# Supplementary material
Source: PubMed Central journal article supplement (PMC4723424)
Supplement: NIHMS255807-supplement-Supp_Table_S1.pdf [file NIHMS255807-supplement-Supp_Table_S1.pdf]

| Chromosome | Gene    | SNP        | Position  | All Sample<br>Genotype n(%)<br>1/1<br>Cases | All Sample<br>Genotype n(%)<br>1/2<br>Cases |
|------------|---------|------------|-----------|---------------------------------------------|---------------------------------------------|
| 15         | CYP19A1 | rs1004983  | 49400944  | 415 (39.3)                                  | 485 (45.9)                                  |
| 15         | CYP19A1 | rs10459592 | 49323433  | 360 (33.3)                                  | 520 (48.1)                                  |
| 15         | CYP19A1 | rs10519295 | 49319939  | 903 (83.1)                                  | 175 (16.1)                                  |
| 15         | CYP19A1 | rs10519296 | 49320386  | 986 (91.4)                                  | 93 (8.6)                                    |
| 15         | CYP19A1 | rs1143704  | 49297994  | 290 (26.8)                                  | 547 (50.6)                                  |
| 15         | CYP19A1 | rs11856927 | 49335997  | 376 (34.7)                                  | 531 (48.9)                                  |
| 15         | CYP19A1 | rs12050772 | 49332163  | 319 (29.4)                                  | 554 (51.0)                                  |
| 15         | CYP19A1 | rs12439137 | 49303596  | 824 (76.2)                                  | 237 (21.9)                                  |
| 15         | CYP19A1 | rs12591359 | 49326660  | 379 (35.0)                                  | 515 (47.6)                                  |
| 15         | CYP19A1 | rs12908960 | 49333152  | 319 (29.4)                                  | 552 (50.9)                                  |
| 15         | CYP19A1 | rs16964258 | 49392700  | 971 (89.7)                                  | 106 (9.8)                                   |
| 15         | CYP19A1 | rs17523880 | 49379835  | 820 (75.6)                                  | 252 (23.2)                                  |
| 15         | CYP19A1 | rs17523922 | 49386497  | 865 (80.0)                                  | 212 (19.6)                                  |
| 15         | CYP19A1 | rs17703883 | 49317389  | 607 (56.2)                                  | 411 (38.0)                                  |
| 15         | CYP19A1 | rs1902584  | 49398946  | 916 (84.4)                                  | 159 (14.7)                                  |
| 15         | CYP19A1 | rs1961177  | 49412370  | 829 (76.4)                                  | 237 (21.8)                                  |
| 15         | CYP19A1 | rs2414099  | 49336074  | 744 (68.7)                                  | 298 (27.5)                                  |
| 15         | CYP19A1 | rs2445762  | 49405000  | 580 (53.7)                                  | 417 (38.6)                                  |
| 15         | CYP19A1 | rs2445765  | 49422190  | 716 (66.0)                                  | 328 (30.2)                                  |
| 15         | CYP19A1 | rs2470144  | 49409017  | 296 (27.3)                                  | 528 (48.6)                                  |
| 15         | CYP19A1 | rs2470146  | 49405661  | 956 (88.3)                                  | 122 (11.3)                                  |
| 15         | CYP19A1 | rs2470152  | 49382264  | 272 (25.2)                                  | 542 (50.3)                                  |
| 15         | CYP19A1 | rs2470157  | 49377192  | 902 (83.1)                                  | 171 (15.7)                                  |
| 15         | CYP19A1 | rs2899470  | 49290969  | 344 (31.7)                                  | 541 (49.9)                                  |
| 15         | CYP19A1 | rs2899472  | 49303347  | 618 (57.1)                                  | 405 (37.4)                                  |
| 15         | CYP19A1 | rs3751591  | 49394002  | 738 (68.1)                                  | 317 (29.3)                                  |
| 15         | CYP19A1 | rs3751592  | 49393870  | 492 (45.4)                                  | 468 (43.2)                                  |
| 15         | CYP19A1 | rs4275794  | 49288409  | 664 (61.5)                                  | 364 (33.7)                                  |
| 15         | CYP19A1 | rs4646     | 49290136  | 604 (55.7)                                  | 400 (36.9)                                  |
| 15         | CYP19A1 | rs700518   | 49316404  | 272 (25.1)                                  | 546 (50.4)                                  |
| 15         | CYP19A1 | rs7172156  | 49333590  | 371 (34.2)                                  | 552 (50.8)                                  |
| 15         | CYP19A1 | rs7174997  | 49409420  | 716 (66.0)                                  | 343 (31.6)                                  |
| 15         | CYP19A1 | rs727479   | 49321839  | 480 (44.3)                                  | 481 (44.4)                                  |
| 15         | CYP19A1 | rs730154   | 49378496  | 796 (73.6)                                  | 256 (23.7)                                  |
| 15         | CYP19A1 | rs8025191  | 49411077  | 686 (63.3)                                  | 347 (32.0)                                  |
| 15         | CYP19A1 | rs8031463  | 49383831  | 958 (89.6)                                  | 95 (8.9)                                    |
| 15         | CYP19A1 | rs934633   | 49287786  | 881 (81.0)                                  | 190 (17.5)                                  |
| 6          | ESR1    | rs10484922 | 152174010 | 889 (81.9)                                  | 181 (16.7)                                  |
| 6          | ESR1    | rs1062577  | 152465598 | 934 (86.6)                                  | 138 (12.8)                                  |
| 6          | ESR1    | rs11964865 | 152352739 | 1026 (94.5)                                 | 59 (5.4)                                    |
| 6          | ESR1    | rs12199102 | 152434254 | 924 (85.1)                                  | 157 (14.5)                                  |
| 6          | ESR1    | rs12199722 | 152276593 | 507 (46.9)                                  | 474 (43.8)                                  |
| 6          | ESR1    | rs12212176 | 152351700 | 726 (67.1)                                  | 319 (29.5)                                  |
| 6          | ESR1    | rs1514348  | 152224008 | 387 (35.8)                                  | 516 (47.7)                                  |
| 6          | ESR1    | rs1543403  | 152470397 | 320 (29.5)                                  | 520 (48.0)                                  |
| 6          | ESR1    | rs1709183  | 152235689 | 566 (52.1)                                  | 438 (40.3)                                  |
| 6          | ESR1    | rs1884051  | 152324972 | 527 (48.7)                                  | 466 (43.1)                                  |
| 6          | ESR1    | rs1884052  | 152333059 | 798 (73.8)                                  | 269 (24.9)                                  |

|    |      |            |           |            |            |
|----|------|------------|-----------|------------|------------|
| 6  | ESR1 | rs2144025  | 152349399 | 793 (73.2) | 266 (24.6) |
| 6  | ESR1 | rs2347923  | 152269114 | 540 (49.9) | 449 (41.5) |
| 6  | ESR1 | rs2747649  | 152468194 | 646 (59.6) | 378 (34.9) |
| 6  | ESR1 | rs2813543  | 152466171 | 650 (59.9) | 382 (35.2) |
| 6  | ESR1 | rs2982683  | 152340128 | 536 (49.5) | 435 (40.2) |
| 6  | ESR1 | rs2982712  | 152399872 | 330 (30.5) | 544 (50.3) |
| 6  | ESR1 | rs2982896  | 152441186 | 658 (60.6) | 368 (33.9) |
| 6  | ESR1 | rs3003925  | 152326151 | 714 (65.7) | 345 (31.7) |
| 6  | ESR1 | rs3020317  | 152320434 | 741 (68.5) | 314 (29.0) |
| 6  | ESR1 | rs3020318  | 152331463 | 483 (44.6) | 496 (45.8) |
| 6  | ESR1 | rs3020368  | 152412883 | 895 (82.6) | 184 (17.0) |
| 6  | ESR1 | rs3020377  | 152314091 | 534 (49.2) | 461 (42.4) |
| 6  | ESR1 | rs3020383  | 152458472 | 910 (84.0) | 168 (15.5) |
| 6  | ESR1 | rs3020393  | 152320578 | 782 (72.2) | 274 (25.3) |
| 6  | ESR1 | rs3020407  | 152348954 | 526 (48.5) | 459 (42.3) |
| 6  | ESR1 | rs3020410  | 152308070 | 839 (77.8) | 226 (21.0) |
| 6  | ESR1 | rs3020434  | 152400633 | 731 (67.3) | 327 (30.1) |
| 6  | ESR1 | rs3778099  | 152460268 | 862 (79.7) | 207 (19.1) |
| 6  | ESR1 | rs3798577  | 152462823 | 279 (25.7) | 541 (49.9) |
| 6  | ESR1 | rs488133   | 152167137 | 467 (43.1) | 473 (43.6) |
| 6  | ESR1 | rs6902771  | 152199574 | 313 (28.8) | 544 (50.1) |
| 6  | ESR1 | rs6912184  | 152301899 | 702 (64.6) | 340 (31.3) |
| 6  | ESR1 | rs6927072  | 152299380 | 524 (48.3) | 469 (43.2) |
| 6  | ESR1 | rs726281   | 152344271 | 584 (54.1) | 426 (39.4) |
| 6  | ESR1 | rs7743290  | 152350825 | 643 (59.4) | 389 (36.0) |
| 6  | ESR1 | rs7757956  | 152358833 | 816 (75.6) | 241 (22.3) |
| 6  | ESR1 | rs7761133  | 152193556 | 770 (71.0) | 286 (26.4) |
| 6  | ESR1 | rs7761846  | 152254201 | 916 (84.8) | 160 (14.8) |
| 6  | ESR1 | rs926777   | 152346740 | 630 (58.0) | 399 (36.7) |
| 6  | ESR1 | rs9322331  | 152204010 | 495 (45.8) | 464 (42.9) |
| 6  | ESR1 | rs9322335  | 152241822 | 631 (58.5) | 390 (36.1) |
| 6  | ESR1 | rs9322336  | 152242123 | 706 (65.0) | 337 (31.0) |
| 6  | ESR1 | rs9340789  | 152185581 | 972 (89.9) | 103 (9.5)  |
| 6  | ESR1 | rs9340835  | 152241624 | 483 (44.6) | 475 (43.8) |
| 6  | ESR1 | rs9340941  | 152354839 | 986 (90.9) | 94 (8.7)   |
| 6  | ESR1 | rs9340954  | 152361865 | 575 (53.3) | 417 (38.7) |
| 6  | ESR1 | rs9340978  | 152375638 | 949 (87.4) | 135 (12.4) |
| 6  | ESR1 | rs9341016  | 152423691 | 963 (88.9) | 115 (10.6) |
| 6  | ESR1 | rs9341019  | 152424381 | 938 (86.3) | 141 (13.0) |
| 6  | ESR1 | rs9341052  | 152458318 | 920 (84.9) | 158 (14.6) |
| 6  | ESR1 | rs9341066  | 152461219 | 961 (88.9) | 118 (10.9) |
| 6  | ESR1 | rs9397463  | 152346021 | 794 (73.1) | 276 (25.4) |
| 6  | ESR1 | rs9479193  | 152436472 | 847 (78.2) | 221 (20.4) |
| 6  | ESR1 | rs985191   | 152325151 | 831 (76.6) | 246 (22.7) |
| 6  | ESR1 | rs985694   | 152328318 | 762 (70.3) | 303 (28.0) |
| 6  | ESR1 | rs988328   | 152282843 | 813 (74.9) | 254 (23.4) |
| 14 | ESR2 | rs12434245 | 63761606  | 896 (82.5) | 179 (16.5) |
| 14 | ESR2 | rs12435857 | 63793278  | 324 (29.9) | 531 (49.1) |
| 14 | ESR2 | rs1255998  | 63763624  | 872 (80.3) | 206 (19.0) |
| 14 | ESR2 | rs1256044  | 63803780  | 356 (32.8) | 540 (49.8) |
| 14 | ESR2 | rs1256063  | 63771970  | 928 (85.5) | 153 (14.1) |
| 14 | ESR2 | rs1256114  | 63879758  | 787 (72.9) | 269 (24.9) |
| 14 | ESR2 | rs1269056  | 63813643  | 359 (33.3) | 531 (49.3) |

|    |       |            |          |             |            |
|----|-------|------------|----------|-------------|------------|
| 14 | ESR2  | rs1887994  | 63830364 | 886 (81.6)  | 191 (17.6) |
| 14 | ESR2  | rs2978381  | 63836405 | 351 (32.4)  | 530 (48.8) |
| 14 | ESR2  | rs3020443  | 63862093 | 602 (55.5)  | 407 (37.5) |
| 14 | ESR2  | rs4986938  | 63769569 | 427 (39.4)  | 492 (45.4) |
| 14 | ESR2  | rs6573553  | 63824114 | 280 (25.8)  | 536 (49.4) |
| 14 | ESR2  | rs7154455  | 63806413 | 502 (46.2)  | 464 (42.7) |
| 14 | ESR2  | rs7159462  | 63828629 | 892 (82.1)  | 182 (16.8) |
| 14 | ESR2  | rs8003490  | 63795122 | 948 (87.8)  | 130 (12.0) |
| 14 | ESR2  | rs8017441  | 63785547 | 905 (84.0)  | 167 (15.5) |
| 14 | ESR2  | rs8020646  | 63761073 | 952 (87.8)  | 129 (11.9) |
| 14 | ESR2  | rs867443   | 63770795 | 576 (53.0)  | 421 (38.8) |
| 1  | PRDM2 | rs11580688 | 13989815 | 589 (54.3)  | 433 (39.9) |
| 1  | PRDM2 | rs1203628  | 13943413 | 932 (85.9)  | 150 (13.8) |
| 1  | PRDM2 | rs1203634  | 13956360 | 639 (58.8)  | 386 (35.5) |
| 1  | PRDM2 | rs1203646  | 13989078 | 1006 (92.8) | 76 (7.0)   |
| 1  | PRDM2 | rs1203679  | 13977211 | 427 (39.4)  | 517 (47.6) |
| 1  | PRDM2 | rs1406417  | 13965452 | 901 (83.0)  | 175 (16.1) |
| 1  | PRDM2 | rs17346675 | 13969669 | 883 (81.5)  | 195 (18.0) |
| 1  | PRDM2 | rs2014788  | 13999040 | 305 (28.1)  | 542 (50.0) |
| 1  | PRDM2 | rs2235514  | 14019522 | 758 (69.9)  | 291 (26.8) |
| 1  | PRDM2 | rs2244634  | 14006741 | 665 (61.7)  | 363 (33.7) |
| 1  | PRDM2 | rs2245197  | 14011783 | 644 (59.3)  | 372 (34.3) |
| 1  | PRDM2 | rs2281164  | 14003215 | 561 (51.7)  | 442 (40.7) |
| 1  | PRDM2 | rs2281166  | 14000739 | 573 (52.9)  | 426 (39.3) |
| 1  | PRDM2 | rs2359756  | 13969007 | 428 (39.4)  | 513 (47.3) |
| 1  | PRDM2 | rs2359758  | 13969110 | 985 (90.6)  | 98 (9.0)   |
| 1  | PRDM2 | rs2473231  | 14028265 | 372 (34.3)  | 536 (49.4) |
| 1  | PRDM2 | rs2495051  | 13920786 | 591 (54.5)  | 411 (37.9) |
| 1  | PRDM2 | rs2495090  | 14027642 | 657 (60.6)  | 383 (35.3) |
| 1  | PRDM2 | rs2697962  | 14023579 | 757 (69.9)  | 291 (26.9) |
| 1  | PRDM2 | rs2744677  | 14027310 | 649 (59.8)  | 384 (35.4) |
| 1  | PRDM2 | rs2744679  | 14024257 | 689 (63.7)  | 343 (31.7) |
| 1  | PRDM2 | rs2744687  | 14011400 | 782 (72.4)  | 270 (25.0) |
| 1  | PRDM2 | rs2744690  | 14010388 | 764 (70.5)  | 284 (26.2) |
| 1  | PRDM2 | rs3820012  | 14022725 | 996 (91.8)  | 87 (8.0)   |
| 1  | PRDM2 | rs6669610  | 14021343 | 942 (86.8)  | 138 (12.7) |

PD = Parkinson's disease

CC = case-unrelated control pairs

CS = case-unaffected sibling pairs

AAO = age at onset

| All Sample Genotype n(%)<br>2/2<br>Cases | All Sample Genotype n(%)<br>1/1<br>Controls | All Sample Genotype n(%)<br>1/2<br>Controls | All Sample Genotype n(%)<br>2/2<br>Controls | PD susceptibility: All Sample Model<br>Trend OR<br>(95%CI) | PD susceptibility: All Sample Trend<br>P-value |
|------------------------------------------|---------------------------------------------|---------------------------------------------|---------------------------------------------|------------------------------------------------------------|------------------------------------------------|
| 156 (14.8)                               | 407 (38.5)                                  | 497 (47.1)                                  | 152 (14.4)                                  | 0.97 (0.84 - 1.13)                                         | 0.7262                                         |
| 201 (18.6)                               | 350 (32.4)                                  | 528 (48.8)                                  | 203 (18.8)                                  | 0.96 (0.83 - 1.10)                                         | 0.531                                          |
| 8 (0.7)                                  | 889 (81.9)                                  | 186 (17.1)                                  | 11 (1.0)                                    | 0.87 (0.68 - 1.11)                                         | 0.2688                                         |
| 0 (0.0)                                  | 997 (92.4)                                  | 79 (7.3)                                    | 3 (0.3)                                     | 1.21 (0.84 - 1.75)                                         | 0.3148                                         |
| 245 (22.6)                               | 290 (26.8)                                  | 535 (49.4)                                  | 257 (23.8)                                  | 0.95 (0.82 - 1.10)                                         | 0.5031                                         |
| 178 (16.4)                               | 380 (35.0)                                  | 521 (48.0)                                  | 184 (17.0)                                  | 1.02 (0.89 - 1.18)                                         | 0.7625                                         |
| 213 (19.6)                               | 331 (30.5)                                  | 531 (48.9)                                  | 224 (20.6)                                  | 1.02 (0.88 - 1.18)                                         | 0.7681                                         |
| 20 (1.9)                                 | 825 (76.3)                                  | 235 (21.7)                                  | 21 (1.9)                                    | 0.99 (0.81 - 1.22)                                         | 0.9531                                         |
| 188 (17.4)                               | 368 (34.0)                                  | 538 (49.7)                                  | 176 (16.3)                                  | 0.99 (0.86 - 1.15)                                         | 0.9338                                         |
| 214 (19.7)                               | 331 (30.5)                                  | 531 (48.9)                                  | 223 (20.6)                                  | 1.03 (0.89 - 1.19)                                         | 0.7121                                         |
| 5 (0.5)                                  | 971 (89.7)                                  | 108 (10.0)                                  | 3 (0.3)                                     | 1.02 (0.74 - 1.41)                                         | 0.9117                                         |
| 12 (1.1)                                 | 851 (78.5)                                  | 209 (19.3)                                  | 24 (2.2)                                    | 1.16 (0.93 - 1.44)                                         | 0.1913                                         |
| 4 (0.4)                                  | 887 (82.1)                                  | 188 (17.4)                                  | 6 (0.6)                                     | 1.18 (0.91 - 1.52)                                         | 0.2113                                         |
| 63 (5.8)                                 | 632 (58.5)                                  | 389 (36.0)                                  | 60 (5.6)                                    | 1.08 (0.92 - 1.28)                                         | 0.3336                                         |
| 10 (0.9)                                 | 923 (85.1)                                  | 155 (14.3)                                  | 7 (0.6)                                     | 1.09 (0.83 - 1.44)                                         | 0.5278                                         |
| 19 (1.8)                                 | 842 (77.6)                                  | 222 (20.5)                                  | 21 (1.9)                                    | 1.05 (0.84 - 1.30)                                         | 0.6801                                         |
| 41 (3.8)                                 | 740 (68.3)                                  | 311 (28.7)                                  | 32 (3.0)                                    | 0.99 (0.81 - 1.20)                                         | 0.8857                                         |
| 84 (7.8)                                 | 572 (52.9)                                  | 439 (40.6)                                  | 70 (6.5)                                    | 1.02 (0.87 - 1.19)                                         | 0.8358                                         |
| 41 (3.8)                                 | 731 (67.4)                                  | 317 (29.2)                                  | 37 (3.4)                                    | 1.07 (0.89 - 1.28)                                         | 0.4585                                         |
| 262 (24.1)                               | 281 (25.9)                                  | 561 (51.7)                                  | 244 (22.5)                                  | 1.01 (0.87 - 1.16)                                         | 0.9211                                         |
| 5 (0.5)                                  | 960 (88.6)                                  | 121 (11.2)                                  | 2 (0.2)                                     | 1.09 (0.82 - 1.46)                                         | 0.5513                                         |
| 264 (24.5)                               | 284 (26.3)                                  | 518 (48.1)                                  | 276 (25.6)                                  | 0.97 (0.85 - 1.12)                                         | 0.7121                                         |
| 13 (1.2)                                 | 858 (79.0)                                  | 216 (19.9)                                  | 12 (1.1)                                    | 0.75 (0.59 - 0.94)                                         | 0.0136                                         |
| 200 (18.4)                               | 337 (31.1)                                  | 533 (49.1)                                  | 215 (19.8)                                  | 0.92 (0.80 - 1.07)                                         | 0.2971                                         |
| 60 (5.5)                                 | 629 (58.1)                                  | 391 (36.1)                                  | 63 (5.8)                                    | 1.05 (0.89 - 1.23)                                         | 0.5859                                         |
| 28 (2.6)                                 | 758 (70.0)                                  | 297 (27.4)                                  | 28 (2.6)                                    | 1.10 (0.91 - 1.33)                                         | 0.3084                                         |
| 123 (11.4)                               | 491 (45.3)                                  | 481 (44.4)                                  | 111 (10.2)                                  | 1.03 (0.89 - 1.19)                                         | 0.7202                                         |
| 52 (4.8)                                 | 680 (63.0)                                  | 353 (32.7)                                  | 47 (4.4)                                    | 1.07 (0.90 - 1.27)                                         | 0.4688                                         |
| 81 (7.5)                                 | 574 (52.9)                                  | 428 (39.4)                                  | 83 (7.6)                                    | 0.89 (0.76 - 1.05)                                         | 0.164                                          |
| 266 (24.5)                               | 273 (25.2)                                  | 541 (49.9)                                  | 270 (24.9)                                  | 0.98 (0.85 - 1.13)                                         | 0.7497                                         |
| 163 (15.0)                               | 421 (38.8)                                  | 484 (44.6)                                  | 181 (16.7)                                  | 1.07 (0.93 - 1.25)                                         | 0.3468                                         |
| 26 (2.4)                                 | 731 (67.4)                                  | 327 (30.1)                                  | 27 (2.5)                                    | 1.06 (0.87 - 1.29)                                         | 0.5499                                         |
| 122 (11.3)                               | 455 (42.0)                                  | 501 (46.3)                                  | 127 (11.7)                                  | 0.91 (0.78 - 1.05)                                         | 0.2037                                         |
| 29 (2.7)                                 | 757 (70.0)                                  | 296 (27.4)                                  | 28 (2.6)                                    | 0.83 (0.68 - 1.00)                                         | 0.0547                                         |
| 51 (4.7)                                 | 673 (62.1)                                  | 365 (33.7)                                  | 46 (4.2)                                    | 0.96 (0.81 - 1.15)                                         | 0.6832                                         |
| 16 (1.5)                                 | 961 (89.9)                                  | 88 (8.2)                                    | 20 (1.9)                                    | 0.97 (0.73 - 1.29)                                         | 0.8174                                         |
| 16 (1.5)                                 | 889 (81.8)                                  | 186 (17.1)                                  | 12 (1.1)                                    | 1.08 (0.86 - 1.37)                                         | 0.5082                                         |
| 15 (1.4)                                 | 907 (83.6)                                  | 167 (15.4)                                  | 11 (1.0)                                    | 1.22 (0.95 - 1.56)                                         | 0.1186                                         |
| 7 (0.6)                                  | 934 (86.6)                                  | 131 (12.1)                                  | 14 (1.3)                                    | 0.95 (0.72 - 1.25)                                         | 0.7036                                         |
| 1 (0.1)                                  | 1015 (93.5)                                 | 70 (6.4)                                    | 1 (0.1)                                     | 0.78 (0.52 - 1.17)                                         | 0.2291                                         |
| 5 (0.5)                                  | 922 (84.9)                                  | 158 (14.5)                                  | 6 (0.6)                                     | 0.98 (0.75 - 1.29)                                         | 0.881                                          |
| 100 (9.3)                                | 522 (48.3)                                  | 438 (40.5)                                  | 121 (11.2)                                  | 0.98 (0.84 - 1.14)                                         | 0.7764                                         |
| 37 (3.4)                                 | 699 (64.6)                                  | 346 (32.0)                                  | 37 (3.4)                                    | 0.90 (0.74 - 1.08)                                         | 0.2503                                         |
| 178 (16.5)                               | 361 (33.4)                                  | 537 (49.7)                                  | 183 (16.9)                                  | 0.91 (0.78 - 1.06)                                         | 0.2203                                         |
| 244 (22.5)                               | 330 (30.4)                                  | 520 (48.0)                                  | 234 (21.6)                                  | 1.07 (0.93 - 1.22)                                         | 0.3737                                         |
| 82 (7.6)                                 | 573 (52.8)                                  | 444 (40.9)                                  | 69 (6.4)                                    | 1.07 (0.91 - 1.26)                                         | 0.4246                                         |
| 89 (8.2)                                 | 536 (49.5)                                  | 453 (41.9)                                  | 93 (8.6)                                    | 1.03 (0.88 - 1.21)                                         | 0.6907                                         |
| 14 (1.3)                                 | 826 (76.4)                                  | 232 (21.5)                                  | 23 (2.1)                                    | 1.13 (0.92 - 1.40)                                         | 0.2413                                         |

|            |            |            |            |                    |        |
|------------|------------|------------|------------|--------------------|--------|
| 24 (2.2)   | 813 (75.1) | 244 (22.5) | 26 (2.4)   | 1.12 (0.91 - 1.37) | 0.2834 |
| 94 (8.7)   | 537 (49.6) | 450 (41.6) | 96 (8.9)   | 0.98 (0.84 - 1.15) | 0.8413 |
| 60 (5.5)   | 660 (60.9) | 365 (33.7) | 59 (5.4)   | 1.08 (0.91 - 1.28) | 0.3848 |
| 53 (4.9)   | 616 (56.8) | 409 (37.7) | 60 (5.5)   | 0.83 (0.70 - 0.99) | 0.0333 |
| 112 (10.3) | 537 (49.6) | 431 (39.8) | 115 (10.6) | 0.97 (0.83 - 1.13) | 0.694  |
| 207 (19.1) | 352 (32.6) | 538 (49.8) | 191 (17.7) | 1.12 (0.96 - 1.30) | 0.146  |
| 59 (5.4)   | 631 (58.2) | 404 (37.2) | 50 (4.6)   | 0.92 (0.77 - 1.10) | 0.3577 |
| 28 (2.6)   | 724 (66.6) | 317 (29.2) | 46 (4.2)   | 0.97 (0.80 - 1.18) | 0.7626 |
| 27 (2.5)   | 746 (68.9) | 305 (28.2) | 31 (2.9)   | 1.02 (0.84 - 1.23) | 0.8683 |
| 103 (9.5)  | 484 (44.7) | 493 (45.6) | 105 (9.7)  | 1.02 (0.87 - 1.19) | 0.845  |
| 5 (0.5)    | 882 (81.4) | 198 (18.3) | 4 (0.4)    | 0.88 (0.68 - 1.15) | 0.3647 |
| 91 (8.4)   | 541 (49.8) | 456 (42.0) | 89 (8.2)   | 1.04 (0.89 - 1.22) | 0.5888 |
| 5 (0.5)    | 900 (83.1) | 180 (16.6) | 3 (0.3)    | 0.91 (0.69 - 1.20) | 0.5097 |
| 27 (2.5)   | 786 (72.6) | 274 (25.3) | 23 (2.1)   | 1.05 (0.86 - 1.29) | 0.61   |
| 99 (9.1)   | 504 (46.5) | 473 (43.6) | 107 (9.9)  | 0.91 (0.77 - 1.07) | 0.2355 |
| 13 (1.2)   | 815 (75.6) | 250 (23.2) | 13 (1.2)   | 0.88 (0.71 - 1.09) | 0.2504 |
| 28 (2.6)   | 720 (66.3) | 336 (30.9) | 30 (2.8)   | 0.92 (0.76 - 1.11) | 0.387  |
| 13 (1.2)   | 902 (83.4) | 166 (15.3) | 14 (1.3)   | 1.37 (1.07 - 1.76) | 0.0116 |
| 265 (24.4) | 317 (29.2) | 506 (46.6) | 262 (24.1) | 1.11 (0.96 - 1.28) | 0.1632 |
| 144 (13.3) | 481 (44.4) | 470 (43.4) | 133 (12.3) | 1.07 (0.93 - 1.25) | 0.3455 |
| 228 (21.0) | 324 (29.9) | 518 (47.7) | 243 (22.4) | 1.00 (0.86 - 1.16) | 0.9909 |
| 45 (4.1)   | 704 (64.8) | 340 (31.3) | 43 (4.0)   | 1.01 (0.85 - 1.21) | 0.897  |
| 93 (8.6)   | 515 (47.4) | 466 (42.9) | 105 (9.7)  | 0.94 (0.80 - 1.10) | 0.4152 |
| 70 (6.5)   | 579 (53.6) | 429 (39.7) | 72 (6.7)   | 0.98 (0.83 - 1.16) | 0.8567 |
| 50 (4.6)   | 663 (61.3) | 372 (34.4) | 47 (4.3)   | 1.10 (0.91 - 1.33) | 0.3073 |
| 23 (2.1)   | 795 (73.6) | 262 (24.3) | 23 (2.1)   | 0.86 (0.69 - 1.07) | 0.1747 |
| 29 (2.7)   | 791 (72.9) | 268 (24.7) | 26 (2.4)   | 1.17 (0.95 - 1.45) | 0.131  |
| 4 (0.4)    | 894 (82.8) | 179 (16.6) | 7 (0.6)    | 0.79 (0.59 - 1.04) | 0.092  |
| 57 (5.2)   | 639 (58.8) | 384 (35.4) | 63 (5.8)   | 1.02 (0.86 - 1.21) | 0.8197 |
| 122 (11.3) | 482 (44.6) | 456 (42.2) | 143 (13.2) | 0.92 (0.79 - 1.07) | 0.2614 |
| 58 (5.4)   | 620 (57.5) | 408 (37.8) | 51 (4.7)   | 0.98 (0.83 - 1.17) | 0.8547 |
| 43 (4.0)   | 696 (64.1) | 348 (32.0) | 42 (3.9)   | 0.96 (0.80 - 1.15) | 0.6808 |
| 6 (0.6)    | 951 (88.0) | 119 (11.0) | 11 (1.0)   | 0.74 (0.55 - 1.01) | 0.0541 |
| 126 (11.6) | 475 (43.8) | 494 (45.6) | 115 (10.6) | 1.01 (0.87 - 1.17) | 0.9209 |
| 5 (0.5)    | 972 (89.6) | 110 (10.1) | 3 (0.3)    | 0.88 (0.65 - 1.18) | 0.3934 |
| 86 (8.0)   | 580 (53.8) | 416 (38.6) | 82 (7.6)   | 1.03 (0.87 - 1.22) | 0.7441 |
| 2 (0.2)    | 946 (87.1) | 139 (12.8) | 1 (0.1)    | 0.97 (0.72 - 1.32) | 0.8585 |
| 5 (0.5)    | 969 (89.5) | 112 (10.3) | 2 (0.2)    | 1.13 (0.84 - 1.52) | 0.4098 |
| 8 (0.7)    | 959 (88.2) | 124 (11.4) | 4 (0.4)    | 1.34 (1.00 - 1.81) | 0.0528 |
| 6 (0.6)    | 915 (84.4) | 160 (14.8) | 9 (0.8)    | 0.92 (0.71 - 1.19) | 0.5113 |
| 2 (0.2)    | 940 (87.0) | 137 (12.7) | 4 (0.4)    | 0.76 (0.56 - 1.03) | 0.0735 |
| 16 (1.5)   | 788 (72.6) | 280 (25.8) | 18 (1.7)   | 0.97 (0.79 - 1.19) | 0.7556 |
| 15 (1.4)   | 876 (80.9) | 192 (17.7) | 15 (1.4)   | 1.23 (0.98 - 1.56) | 0.0759 |
| 8 (0.7)    | 844 (77.8) | 223 (20.6) | 18 (1.7)   | 1.02 (0.81 - 1.29) | 0.8388 |
| 19 (1.8)   | 791 (73.0) | 261 (24.1) | 32 (3.0)   | 1.10 (0.91 - 1.34) | 0.3219 |
| 19 (1.7)   | 816 (75.1) | 250 (23.0) | 20 (1.8)   | 1.00 (0.81 - 1.24) | 0.9905 |
| 11 (1.0)   | 929 (85.5) | 148 (13.6) | 9 (0.8)    | 1.32 (1.03 - 1.69) | 0.0298 |
| 227 (21.0) | 322 (29.8) | 548 (50.6) | 212 (19.6) | 1.04 (0.90 - 1.20) | 0.6029 |
| 8 (0.7)    | 883 (81.3) | 192 (17.7) | 11 (1.0)   | 1.02 (0.79 - 1.30) | 0.9009 |
| 189 (17.4) | 355 (32.7) | 529 (48.8) | 201 (18.5) | 0.98 (0.85 - 1.13) | 0.782  |
| 5 (0.5)    | 929 (85.5) | 149 (13.7) | 8 (0.7)    | 0.96 (0.74 - 1.26) | 0.7943 |
| 24 (2.2)   | 806 (74.6) | 254 (23.5) | 20 (1.9)   | 1.12 (0.91 - 1.37) | 0.2762 |
| 187 (17.4) | 355 (33.0) | 526 (48.8) | 196 (18.2) | 0.98 (0.85 - 1.13) | 0.7857 |

|            |            |            |            |                    |        |
|------------|------------|------------|------------|--------------------|--------|
| 9 (0.8)    | 896 (82.5) | 180 (16.6) | 10 (0.9)   | 1.09 (0.85 - 1.39) | 0.5023 |
| 204 (18.8) | 360 (33.2) | 518 (47.7) | 207 (19.1) | 1.00 (0.87 - 1.15) | 0.9483 |
| 75 (6.9)   | 582 (53.7) | 419 (38.7) | 83 (7.7)   | 0.92 (0.78 - 1.08) | 0.2885 |
| 164 (15.1) | 403 (37.2) | 517 (47.7) | 163 (15.1) | 0.94 (0.81 - 1.08) | 0.3881 |
| 268 (24.7) | 278 (25.6) | 528 (48.7) | 278 (25.6) | 0.97 (0.85 - 1.12) | 0.6999 |
| 120 (11.0) | 486 (44.8) | 473 (43.6) | 127 (11.7) | 0.93 (0.80 - 1.08) | 0.33   |
| 12 (1.1)   | 923 (85.0) | 152 (14.0) | 11 (1.0)   | 1.28 (1.00 - 1.64) | 0.0501 |
| 2 (0.2)    | 953 (88.2) | 123 (11.4) | 4 (0.4)    | 0.99 (0.72 - 1.35) | 0.9332 |
| 5 (0.5)    | 914 (84.9) | 157 (14.6) | 6 (0.6)    | 1.04 (0.79 - 1.37) | 0.7827 |
| 3 (0.3)    | 958 (88.4) | 121 (11.2) | 5 (0.5)    | 1.01 (0.74 - 1.37) | 0.9589 |
| 89 (8.2)   | 549 (50.6) | 439 (40.4) | 98 (9.0)   | 0.90 (0.77 - 1.04) | 0.1606 |
| 62 (5.7)   | 567 (52.3) | 456 (42.1) | 61 (5.6)   | 0.92 (0.78 - 1.09) | 0.3498 |
| 3 (0.3)    | 941 (86.7) | 138 (12.7) | 6 (0.6)    | 1.06 (0.79 - 1.41) | 0.7107 |
| 61 (5.6)   | 626 (57.6) | 398 (36.6) | 62 (5.7)   | 0.95 (0.80 - 1.13) | 0.5673 |
| 2 (0.2)    | 993 (91.6) | 89 (8.2)   | 2 (0.2)    | 0.76 (0.53 - 1.10) | 0.1514 |
| 141 (13.0) | 436 (40.2) | 503 (46.4) | 146 (13.5) | 1.01 (0.87 - 1.17) | 0.9116 |
| 10 (0.9)   | 906 (83.4) | 176 (16.2) | 4 (0.4)    | 1.10 (0.85 - 1.44) | 0.4681 |
| 6 (0.6)    | 894 (82.5) | 179 (16.5) | 11 (1.0)   | 1.06 (0.83 - 1.35) | 0.6409 |
| 238 (21.9) | 290 (26.7) | 577 (53.2) | 218 (20.1) | 1.01 (0.87 - 1.18) | 0.8581 |
| 35 (3.2)   | 825 (76.1) | 231 (21.3) | 28 (2.6)   | 1.41 (1.15 - 1.73) | 0.0011 |
| 50 (4.6)   | 739 (68.6) | 295 (27.4) | 44 (4.1)   | 1.38 (1.14 - 1.66) | 0.0009 |
| 70 (6.4)   | 706 (65.0) | 326 (30.0) | 54 (5.0)   | 1.34 (1.12 - 1.61) | 0.0015 |
| 82 (7.6)   | 546 (50.3) | 453 (41.8) | 86 (7.9)   | 0.93 (0.79 - 1.10) | 0.4045 |
| 85 (7.8)   | 563 (51.9) | 446 (41.1) | 75 (6.9)   | 1.00 (0.85 - 1.18) | 0.9807 |
| 144 (13.3) | 431 (39.7) | 522 (48.1) | 132 (12.2) | 1.05 (0.90 - 1.21) | 0.5515 |
| 4 (0.4)    | 986 (90.7) | 99 (9.1)   | 2 (0.2)    | 1.03 (0.73 - 1.44) | 0.8777 |
| 178 (16.4) | 410 (37.8) | 499 (45.9) | 177 (16.3) | 1.11 (0.95 - 1.29) | 0.1793 |
| 83 (7.6)   | 566 (52.2) | 436 (40.2) | 83 (7.6)   | 0.92 (0.79 - 1.08) | 0.3187 |
| 44 (4.1)   | 655 (60.4) | 379 (35.0) | 50 (4.6)   | 0.97 (0.81 - 1.16) | 0.7376 |
| 35 (3.2)   | 826 (76.3) | 230 (21.2) | 27 (2.5)   | 1.45 (1.18 - 1.79) | 0.0005 |
| 52 (4.8)   | 711 (65.5) | 313 (28.8) | 61 (5.6)   | 1.19 (1.00 - 1.42) | 0.0498 |
| 50 (4.6)   | 759 (70.1) | 285 (26.3) | 38 (3.5)   | 1.39 (1.15 - 1.67) | 0.0006 |
| 28 (2.6)   | 855 (79.2) | 204 (18.9) | 21 (1.9)   | 1.53 (1.23 - 1.91) | 0.0002 |
| 36 (3.3)   | 842 (77.7) | 216 (19.9) | 26 (2.4)   | 1.54 (1.24 - 1.90) | 0.0001 |
| 2 (0.2)    | 998 (92.0) | 86 (7.9)   | 1 (0.1)    | 1.06 (0.74 - 1.53) | 0.7477 |
| 5 (0.5)    | 927 (85.4) | 148 (13.6) | 10 (0.9)   | 0.84 (0.63 - 1.10) | 0.2069 |

| PD susceptibility: All Sample Model | PD susceptibility: All Sample Dominant OR (95%CI) | PD susceptibility: All Sample Dominant P-value | PD susceptibility: All Sample Recessive Model OR (95%CI) | PD susceptibility: All Sample Recessive P-value | Men Genotype n(%) 1/1 Cases | Men Genotype n(%) 1/2 Cases |
|-------------------------------------|---------------------------------------------------|------------------------------------------------|----------------------------------------------------------|-------------------------------------------------|-----------------------------|-----------------------------|
| 0.95 (0.77 - 1.16)                  |                                                   | 0.5971                                         | 1.01 (0.77 - 1.33)                                       | 0.9497                                          | 209 (39.6)                  | 244 (46.2)                  |
| 0.92 (0.75 - 1.13)                  |                                                   | 0.4498                                         | 0.98 (0.76 - 1.26)                                       | 0.8579                                          | 179 (32.9)                  | 258 (47.4)                  |
| 0.87 (0.66 - 1.14)                  |                                                   | 0.3102                                         | 0.74 (0.29 - 1.86)                                       | 0.5171                                          | 451 (82.3)                  | 92 (16.8)                   |
| 1.30 (0.89 - 1.90)                  |                                                   | 0.1813                                         | 0.00 (0.00 - )                                           | 0.9751                                          | 500 (91.9)                  | 44 (8.1)                    |
| 0.98 (0.79 - 1.22)                  |                                                   | 0.8715                                         | 0.89 (0.70 - 1.14)                                       | 0.3582                                          | 144 (26.4)                  | 269 (49.4)                  |
| 1.05 (0.85 - 1.30)                  |                                                   | 0.6366                                         | 1.00 (0.78 - 1.27)                                       | 0.9848                                          | 195 (35.7)                  | 261 (47.8)                  |
| 1.09 (0.88 - 1.37)                  |                                                   | 0.4305                                         | 0.96 (0.76 - 1.21)                                       | 0.7319                                          | 170 (31.0)                  | 269 (49.1)                  |
| 1.00 (0.80 - 1.26)                  |                                                   | 0.9856                                         | 0.91 (0.46 - 1.83)                                       | 0.8007                                          | 419 (76.9)                  | 114 (20.9)                  |
| 0.93 (0.75 - 1.14)                  |                                                   | 0.4813                                         | 1.10 (0.85 - 1.43)                                       | 0.4684                                          | 192 (35.2)                  | 256 (46.9)                  |
| 1.09 (0.88 - 1.37)                  |                                                   | 0.4305                                         | 0.97 (0.77 - 1.23)                                       | 0.823                                           | 170 (31.1)                  | 268 (49.0)                  |
| 1.00 (0.71 - 1.40)                  |                                                   | 0.9818                                         | 1.78 (0.32 - 9.87)                                       | 0.5117                                          | 487 (89.4)                  | 57 (10.5)                   |
| 1.29 (1.02 - 1.65)                  |                                                   | 0.0359                                         | 0.50 (0.24 - 1.04)                                       | 0.0655                                          | 423 (77.5)                  | 118 (21.6)                  |
| 1.22 (0.93 - 1.59)                  |                                                   | 0.1457                                         | 0.51 (0.12 - 2.22)                                       | 0.3666                                          | 439 (80.6)                  | 105 (19.3)                  |
| 1.10 (0.91 - 1.34)                  |                                                   | 0.3335                                         | 1.09 (0.71 - 1.69)                                       | 0.6899                                          | 302 (55.6)                  | 210 (38.7)                  |
| 1.06 (0.79 - 1.42)                  |                                                   | 0.6932                                         | 2.04 (0.59 - 7.13)                                       | 0.2621                                          | 457 (83.7)                  | 85 (15.6)                   |
| 1.06 (0.84 - 1.35)                  |                                                   | 0.6143                                         | 0.93 (0.42 - 2.04)                                       | 0.8596                                          | 416 (76.1)                  | 123 (22.5)                  |
| 0.92 (0.74 - 1.15)                  |                                                   | 0.4804                                         | 1.47 (0.84 - 2.58)                                       | 0.1813                                          | 378 (69.5)                  | 143 (26.3)                  |
| 0.96 (0.79 - 1.17)                  |                                                   | 0.6976                                         | 1.27 (0.87 - 1.86)                                       | 0.2166                                          | 303 (55.7)                  | 199 (36.6)                  |
| 1.07 (0.87 - 1.31)                  |                                                   | 0.5398                                         | 1.18 (0.69 - 2.04)                                       | 0.5392                                          | 359 (65.6)                  | 172 (31.4)                  |
| 0.91 (0.72 - 1.14)                  |                                                   | 0.3941                                         | 1.12 (0.90 - 1.40)                                       | 0.32                                            | 151 (27.6)                  | 269 (49.1)                  |
| 1.06 (0.78 - 1.45)                  |                                                   | 0.6941                                         | 2.51 (0.49 - )                                           | 0.2726                                          | 484 (88.5)                  | 61 (11.2)                   |
| 1.02 (0.82 - 1.27)                  |                                                   | 0.8455                                         | 0.91 (0.72 - 1.15)                                       | 0.414                                           | 139 (25.5)                  | 261 (47.9)                  |
| 0.70 (0.54 - 0.90)                  |                                                   | 0.005                                          | 1.18 (0.52 - 2.68)                                       | 0.7004                                          | 448 (81.9)                  | 90 (16.5)                   |
| 0.94 (0.76 - 1.16)                  |                                                   | 0.5401                                         | 0.87 (0.67 - 1.12)                                       | 0.2796                                          | 172 (31.4)                  | 270 (49.4)                  |
| 1.08 (0.89 - 1.33)                  |                                                   | 0.4261                                         | 0.96 (0.66 - 1.40)                                       | 0.8256                                          | 322 (58.9)                  | 191 (34.9)                  |
| 1.13 (0.91 - 1.39)                  |                                                   | 0.2749                                         | 1.05 (0.57 - 1.93)                                       | 0.8844                                          | 370 (67.6)                  | 164 (30.0)                  |
| 0.99 (0.81 - 1.21)                  |                                                   | 0.9348                                         | 1.15 (0.84 - 1.57)                                       | 0.3822                                          | 253 (46.4)                  | 235 (43.1)                  |
| 1.06 (0.87 - 1.31)                  |                                                   | 0.5482                                         | 1.14 (0.71 - 1.82)                                       | 0.5786                                          | 337 (62.1)                  | 179 (33.0)                  |
| 0.85 (0.70 - 1.03)                  |                                                   | 0.0988                                         | 0.98 (0.67 - 1.42)                                       | 0.9106                                          | 302 (55.1)                  | 199 (36.3)                  |
| 0.99 (0.79 - 1.23)                  |                                                   | 0.9283                                         | 0.95 (0.75 - 1.20)                                       | 0.6738                                          | 137 (25.1)                  | 267 (48.9)                  |
| 1.24 (1.01 - 1.51)                  |                                                   | 0.0361                                         | 0.83 (0.62 - 1.11)                                       | 0.2171                                          | 185 (33.8)                  | 282 (51.6)                  |
| 1.08 (0.88 - 1.34)                  |                                                   | 0.4581                                         | 0.93 (0.51 - 1.70)                                       | 0.809                                           | 365 (66.7)                  | 164 (30.0)                  |
| 0.87 (0.72 - 1.06)                  |                                                   | 0.1752                                         | 0.92 (0.68 - 1.26)                                       | 0.6138                                          | 236 (43.3)                  | 245 (45.0)                  |
| 0.78 (0.62 - 0.97)                  |                                                   | 0.0253                                         | 1.04 (0.58 - 1.89)                                       | 0.8916                                          | 391 (71.7)                  | 140 (25.7)                  |
| 0.93 (0.76 - 1.15)                  |                                                   | 0.5139                                         | 1.11 (0.68 - 1.79)                                       | 0.6842                                          | 350 (64.2)                  | 173 (31.7)                  |
| 1.03 (0.73 - 1.46)                  |                                                   | 0.8528                                         | 0.63 (0.28 - 1.45)                                       | 0.2771                                          | 479 (89.0)                  | 53 (9.9)                    |
| 1.06 (0.82 - 1.37)                  |                                                   | 0.6434                                         | 1.51 (0.61 - 3.76)                                       | 0.3736                                          | 446 (81.4)                  | 91 (16.6)                   |
| 1.22 (0.93 - 1.61)                  |                                                   | 0.1502                                         | 1.44 (0.63 - 3.28)                                       | 0.3905                                          | 435 (79.7)                  | 101 (18.5)                  |
| 1.02 (0.75 - 1.37)                  |                                                   | 0.9117                                         | 0.41 (0.14 - 1.18)                                       | 0.0988                                          | 473 (86.8)                  | 70 (12.8)                   |
| 0.77 (0.50 - 1.17)                  |                                                   | 0.2161                                         | 0.94 (0.06 - )                                           | 0.9651                                          | 520 (95.1)                  | 26 (4.8)                    |
| 1.00 (0.75 - 1.33)                  |                                                   | 0.9874                                         | 0.64 (0.17 - 2.45)                                       | 0.5124                                          | 456 (83.4)                  | 90 (16.5)                   |
| 1.07 (0.88 - 1.31)                  |                                                   | 0.4845                                         | 0.77 (0.56 - 1.05)                                       | 0.0964                                          | 254 (46.6)                  | 242 (44.4)                  |
| 0.87 (0.71 - 1.08)                  |                                                   | 0.2081                                         | 0.97 (0.55 - 1.69)                                       | 0.9067                                          | 361 (66.1)                  | 165 (30.2)                  |
| 0.86 (0.69 - 1.05)                  |                                                   | 0.1412                                         | 0.96 (0.73 - 1.26)                                       | 0.7592                                          | 202 (37.0)                  | 263 (48.2)                  |
| 1.08 (0.87 - 1.34)                  |                                                   | 0.4961                                         | 1.09 (0.87 - 1.38)                                       | 0.4508                                          | 154 (28.2)                  | 264 (48.3)                  |
| 1.03 (0.84 - 1.26)                  |                                                   | 0.8104                                         | 1.28 (0.89 - 1.83)                                       | 0.1873                                          | 291 (53.1)                  | 212 (38.7)                  |
| 1.08 (0.88 - 1.32)                  |                                                   | 0.4646                                         | 0.93 (0.65 - 1.33)                                       | 0.6891                                          | 263 (48.3)                  | 242 (44.5)                  |
| 1.25 (0.99 - 1.58)                  |                                                   | 0.0635                                         | 0.52 (0.24 - 1.10)                                       | 0.0863                                          | 397 (73.0)                  | 140 (25.7)                  |

|                    |        |                    |        |            |            |
|--------------------|--------|--------------------|--------|------------|------------|
| 1.15 (0.92 - 1.45) | 0.226  | 1.01 (0.53 - 1.93) | 0.975  | 399 (73.1) | 138 (25.3) |
| 0.99 (0.81 - 1.21) | 0.921  | 0.95 (0.67 - 1.35) | 0.7882 | 283 (51.8) | 216 (39.6) |
| 1.10 (0.90 - 1.36) | 0.3414 | 1.04 (0.68 - 1.60) | 0.8521 | 313 (57.4) | 198 (36.3) |
| 0.80 (0.65 - 0.98) | 0.03   | 0.85 (0.55 - 1.31) | 0.4615 | 342 (62.5) | 181 (33.1) |
| 0.97 (0.80 - 1.18) | 0.7553 | 0.95 (0.69 - 1.31) | 0.749  | 268 (49.2) | 222 (40.7) |
| 1.15 (0.92 - 1.43) | 0.2203 | 1.14 (0.89 - 1.46) | 0.3077 | 156 (28.7) | 287 (52.8) |
| 0.85 (0.69 - 1.04) | 0.1174 | 1.26 (0.81 - 1.99) | 0.308  | 331 (60.6) | 187 (34.2) |
| 1.08 (0.87 - 1.34) | 0.4932 | 0.50 (0.28 - 0.87) | 0.0141 | 363 (66.2) | 168 (30.7) |
| 1.05 (0.85 - 1.30) | 0.6617 | 0.82 (0.46 - 1.47) | 0.5108 | 375 (68.6) | 157 (28.7) |
| 1.03 (0.84 - 1.25) | 0.7791 | 0.99 (0.70 - 1.39) | 0.953  | 252 (46.2) | 239 (43.9) |
| 0.88 (0.67 - 1.15) | 0.3556 | 1.02 (0.21 - 4.85) | 0.9801 | 446 (81.7) | 98 (17.9)  |
| 1.06 (0.87 - 1.30) | 0.5417 | 1.02 (0.72 - 1.46) | 0.8975 | 268 (49.0) | 237 (43.3) |
| 0.90 (0.68 - 1.18) | 0.4398 | 1.74 (0.30 -       | 0.5354 | 453 (83.1) | 90 (16.5)  |
| 1.05 (0.83 - 1.32) | 0.6852 | 1.16 (0.63 - 2.15) | 0.6361 | 392 (71.9) | 137 (25.1) |
| 0.89 (0.73 - 1.10) | 0.2821 | 0.88 (0.62 - 1.24) | 0.4665 | 269 (49.4) | 229 (42.0) |
| 0.86 (0.68 - 1.10) | 0.23   | 0.93 (0.41 - 2.10) | 0.8617 | 423 (77.9) | 112 (20.6) |
| 0.92 (0.74 - 1.14) | 0.4275 | 0.86 (0.46 - 1.59) | 0.626  | 362 (66.2) | 174 (31.8) |
| 1.44 (1.10 - 1.88) | 0.0077 | 1.11 (0.44 - 2.79) | 0.8235 | 435 (79.8) | 104 (19.1) |
| 1.27 (1.01 - 1.59) | 0.0401 | 1.01 (0.80 - 1.28) | 0.9115 | 139 (25.4) | 277 (50.6) |
| 1.08 (0.88 - 1.32) | 0.4753 | 1.13 (0.84 - 1.52) | 0.4093 | 234 (42.8) | 236 (43.1) |
| 1.08 (0.86 - 1.35) | 0.5088 | 0.92 (0.72 - 1.17) | 0.4947 | 169 (30.9) | 257 (47.0) |
| 1.01 (0.82 - 1.25) | 0.8979 | 1.01 (0.63 - 1.64) | 0.956  | 352 (64.2) | 176 (32.1) |
| 0.95 (0.78 - 1.16) | 0.6406 | 0.85 (0.60 - 1.18) | 0.3298 | 275 (50.3) | 225 (41.1) |
| 0.98 (0.80 - 1.20) | 0.8565 | 0.98 (0.66 - 1.47) | 0.9389 | 303 (55.7) | 207 (38.1) |
| 1.12 (0.90 - 1.39) | 0.2949 | 1.07 (0.67 - 1.73) | 0.7649 | 317 (58.1) | 210 (38.5) |
| 0.83 (0.65 - 1.07) | 0.1453 | 0.96 (0.47 - 1.94) | 0.9003 | 407 (75.0) | 125 (23.0) |
| 1.19 (0.94 - 1.50) | 0.1524 | 1.24 (0.68 - 2.25) | 0.486  | 379 (69.3) | 152 (27.8) |
| 0.79 (0.58 - 1.06) | 0.1178 | 0.54 (0.15 - 1.93) | 0.3423 | 477 (87.5) | 66 (12.1)  |
| 1.06 (0.86 - 1.30) | 0.6076 | 0.89 (0.57 - 1.38) | 0.6044 | 322 (58.8) | 200 (36.5) |
| 0.93 (0.76 - 1.14) | 0.5037 | 0.83 (0.61 - 1.12) | 0.2154 | 266 (48.8) | 219 (40.2) |
| 0.94 (0.77 - 1.15) | 0.5586 | 1.19 (0.77 - 1.85) | 0.4301 | 319 (58.7) | 195 (35.9) |
| 0.94 (0.77 - 1.16) | 0.5825 | 1.05 (0.63 - 1.74) | 0.8472 | 361 (66.0) | 168 (30.7) |
| 0.75 (0.53 - 1.04) | 0.0867 | 0.44 (0.13 - 1.44) | 0.1735 | 488 (89.4) | 55 (10.1)  |
| 0.96 (0.79 - 1.16) | 0.666  | 1.15 (0.84 - 1.57) | 0.3728 | 245 (44.8) | 243 (44.4) |
| 0.84 (0.61 - 1.16) | 0.2866 | 1.61 (0.38 - 6.74) | 0.5146 | 497 (90.9) | 47 (8.6)   |
| 1.03 (0.83 - 1.26) | 0.8125 | 1.06 (0.73 - 1.54) | 0.7715 | 282 (52.0) | 222 (41.0) |
| 0.97 (0.71 - 1.31) | 0.8218 | 1.61 (0.12 -       | 0.7167 | 476 (87.0) | 71 (13.0)  |
| 1.11 (0.81 - 1.52) | 0.5236 | 2.51 (0.49 -       | 0.2724 | 485 (89.2) | 56 (10.3)  |
| 1.34 (0.97 - 1.84) | 0.0746 | 1.99 (0.59 - 6.72) | 0.2687 | 470 (85.8) | 73 (13.3)  |
| 0.93 (0.70 - 1.22) | 0.5851 | 0.65 (0.19 - 2.27) | 0.5017 | 469 (85.7) | 76 (13.9)  |
| 0.76 (0.55 - 1.04) | 0.0843 | 0.51 (0.09 - 2.78) | 0.4365 | 492 (90.4) | 50 (9.2)   |
| 0.98 (0.78 - 1.22) | 0.8284 | 0.84 (0.38 - 1.87) | 0.6735 | 410 (74.8) | 132 (24.1) |
| 1.28 (0.99 - 1.65) | 0.058  | 1.07 (0.46 - 2.48) | 0.878  | 427 (78.2) | 116 (21.2) |
| 1.12 (0.87 - 1.43) | 0.3902 | 0.32 (0.11 - 0.89) | 0.0286 | 424 (77.5) | 121 (22.1) |
| 1.23 (0.99 - 1.53) | 0.066  | 0.52 (0.28 - 0.99) | 0.0472 | 377 (69.0) | 158 (28.9) |
| 1.01 (0.80 - 1.28) | 0.9074 | 0.88 (0.42 - 1.86) | 0.7433 | 411 (75.0) | 131 (23.9) |
| 1.35 (1.03 - 1.77) | 0.0277 | 1.27 (0.50 - 3.23) | 0.6109 | 441 (80.6) | 99 (18.1)  |
| 1.00 (0.81 - 1.24) | 0.9754 | 1.11 (0.87 - 1.41) | 0.3974 | 151 (27.6) | 284 (51.9) |
| 1.05 (0.81 - 1.37) | 0.6967 | 0.58 (0.21 - 1.66) | 0.3141 | 438 (80.1) | 106 (19.4) |
| 1.03 (0.83 - 1.27) | 0.7859 | 0.91 (0.71 - 1.16) | 0.4359 | 187 (34.2) | 269 (49.2) |
| 0.99 (0.74 - 1.32) | 0.9491 | 0.63 (0.20 - 1.94) | 0.417  | 469 (85.6) | 76 (13.9)  |
| 1.12 (0.90 - 1.41) | 0.3154 | 1.23 (0.63 - 2.39) | 0.5413 | 380 (70.1) | 151 (27.9) |
| 1.01 (0.82 - 1.25) | 0.9084 | 0.93 (0.73 - 1.19) | 0.5515 | 189 (34.9) | 264 (48.7) |



|                    |        |                    |        |            |            |
|--------------------|--------|--------------------|--------|------------|------------|
| 1.11 (0.85 - 1.45) | 0.4437 | 0.92 (0.35 - 2.41) | 0.8653 | 444 (81.2) | 102 (18.6) |
| 1.04 (0.84 - 1.28) | 0.7236 | 0.96 (0.76 - 1.23) | 0.7642 | 167 (30.6) | 268 (49.1) |
| 0.92 (0.75 - 1.12) | 0.3911 | 0.86 (0.60 - 1.22) | 0.3872 | 299 (54.7) | 210 (38.4) |
| 0.90 (0.73 - 1.10) | 0.3003 | 0.97 (0.74 - 1.27) | 0.8217 | 215 (39.5) | 247 (45.4) |
| 1.00 (0.80 - 1.26) | 0.9804 | 0.93 (0.75 - 1.16) | 0.5285 | 142 (26.1) | 280 (51.4) |
| 0.92 (0.75 - 1.11) | 0.377  | 0.90 (0.67 - 1.22) | 0.5084 | 257 (47.0) | 226 (41.3) |
| 1.31 (1.01 - 1.71) | 0.044  | 1.18 (0.48 - 2.91) | 0.7229 | 441 (80.5) | 99 (18.1)  |
| 1.01 (0.73 - 1.40) | 0.9368 | 0.33 (0.03 - 3.20) | 0.3408 | 479 (87.9) | 65 (11.9)  |
| 1.06 (0.80 - 1.41) | 0.6951 | 0.72 (0.19 - 2.72) | 0.6282 | 451 (83.4) | 87 (16.1)  |
| 1.04 (0.76 - 1.43) | 0.8034 | 0.42 (0.08 - 2.38) | 0.3297 | 475 (87.0) | 70 (12.8)  |
| 0.88 (0.72 - 1.07) | 0.207  | 0.86 (0.62 - 1.19) | 0.3523 | 291 (53.2) | 210 (38.4) |
| 0.88 (0.72 - 1.08) | 0.2238 | 1.04 (0.69 - 1.57) | 0.8423 | 288 (52.8) | 226 (41.5) |
| 1.10 (0.81 - 1.48) | 0.5561 | 0.54 (0.14 - 2.20) | 0.3931 | 462 (84.5) | 83 (15.2)  |
| 0.93 (0.76 - 1.14) | 0.5057 | 0.99 (0.66 - 1.50) | 0.9648 | 320 (58.4) | 197 (35.9) |
| 0.76 (0.52 - 1.11) | 0.1511 | 0.77 (0.11 - 5.64) | 0.7968 | 511 (93.4) | 35 (6.4)   |
| 1.03 (0.84 - 1.26) | 0.7789 | 0.97 (0.74 - 1.29) | 0.855  | 212 (38.8) | 271 (49.5) |
| 1.05 (0.80 - 1.38) | 0.7301 | 7.40 (0.89 -       | 0.0644 | 456 (83.2) | 89 (16.2)  |
| 1.11 (0.86 - 1.43) | 0.4292 | 0.57 (0.21 - 1.56) | 0.2767 | 445 (81.7) | 96 (17.6)  |
| 0.89 (0.71 - 1.12) | 0.3221 | 1.19 (0.93 - 1.52) | 0.1681 | 153 (28.0) | 279 (51.0) |
| 1.52 (1.20 - 1.92) | 0.0004 | 1.17 (0.67 - 2.05) | 0.5865 | 388 (71.1) | 142 (26.0) |
| 1.51 (1.21 - 1.88) | 0.0002 | 1.08 (0.66 - 1.76) | 0.7521 | 335 (61.6) | 186 (34.2) |
| 1.43 (1.15 - 1.77) | 0.0015 | 1.34 (0.87 - 2.04) | 0.1797 | 332 (60.6) | 188 (34.3) |
| 0.91 (0.74 - 1.12) | 0.377  | 0.95 (0.66 - 1.37) | 0.7956 | 275 (50.3) | 236 (43.1) |
| 0.95 (0.78 - 1.15) | 0.5764 | 1.24 (0.85 - 1.81) | 0.2618 | 287 (52.6) | 220 (40.3) |
| 1.01 (0.83 - 1.23) | 0.9241 | 1.17 (0.87 - 1.56) | 0.3022 | 209 (38.2) | 271 (49.5) |
| 1.00 (0.70 - 1.43) | 0.9844 | 2.08 (0.36 -       | 0.4101 | 494 (90.1) | 52 (9.5)   |
| 1.26 (1.01 - 1.56) | 0.0409 | 0.98 (0.75 - 1.28) | 0.8697 | 188 (34.4) | 280 (51.2) |
| 0.89 (0.72 - 1.09) | 0.2426 | 0.97 (0.68 - 1.37) | 0.8424 | 295 (54.0) | 211 (38.6) |
| 0.99 (0.81 - 1.22) | 0.9485 | 0.85 (0.54 - 1.33) | 0.4701 | 339 (62.0) | 184 (33.6) |
| 1.57 (1.24 - 1.99) | 0.0002 | 1.24 (0.70 - 2.20) | 0.4561 | 387 (70.9) | 142 (26.0) |
| 1.38 (1.11 - 1.70) | 0.003  | 0.75 (0.49 - 1.16) | 0.1962 | 336 (61.4) | 187 (34.2) |
| 1.49 (1.20 - 1.86) | 0.0003 | 1.30 (0.81 - 2.09) | 0.28   | 354 (64.8) | 168 (30.8) |
| 1.67 (1.30 - 2.14) | 0.0001 | 1.25 (0.65 - 2.40) | 0.4969 | 401 (73.6) | 131 (24.0) |
| 1.67 (1.31 - 2.13) | 0      | 1.34 (0.76 - 2.39) | 0.3143 | 388 (71.1) | 143 (26.2) |
| 1.05 (0.72 - 1.52) | 0.8126 | 2.08 (0.17 -       | 0.5665 | 504 (92.3) | 41 (7.5)   |
| 0.86 (0.64 - 1.16) | 0.3171 | 0.40 (0.11 - 1.53) | 0.1824 | 476 (87.0) | 69 (12.6)  |

| Men<br>Genotype n(%)<br>2/2<br>Cases | Men<br>Genotype n(%)<br>1/1<br>Controls | Men<br>Genotype n(%)<br>1/2<br>Controls | Men<br>Genotype n(%)<br>2/2<br>Controls | PD susceptibility: Men<br>Trend Model<br>OR (95%CI) | PD susceptibility:<br>Men Trend<br>P-value |
|--------------------------------------|-----------------------------------------|-----------------------------------------|-----------------------------------------|-----------------------------------------------------|--------------------------------------------|
| 75 (14.2)                            | 203 (38.4)                              | 255 (48.3)                              | 70 (13.3)                               | 1.00 (0.81 - 1.22)                                  | 0.9729                                     |
| 107 (19.7)                           | 180 (33.1)                              | 261 (48.0)                              | 103 (18.9)                              | 1.02 (0.84 - 1.24)                                  | 0.8156                                     |
| 5 (0.9)                              | 448 (81.8)                              | 95 (17.3)                               | 5 (0.9)                                 | 0.96 (0.69 - 1.33)                                  | 0.7953                                     |
| 0 (0.0)                              | 508 (93.4)                              | 34 (6.3)                                | 2 (0.4)                                 | 1.21 (0.73 - 2.00)                                  | 0.4503                                     |
| 132 (24.2)                           | 142 (26.1)                              | 273 (50.1)                              | 130 (23.9)                              | 1.00 (0.82 - 1.22)                                  | 0.9906                                     |
| 90 (16.5)                            | 200 (36.6)                              | 254 (46.5)                              | 92 (16.8)                               | 1.01 (0.84 - 1.22)                                  | 0.8934                                     |
| 109 (19.9)                           | 168 (30.7)                              | 269 (49.1)                              | 111 (20.3)                              | 0.98 (0.81 - 1.19)                                  | 0.8403                                     |
| 12 (2.2)                             | 422 (77.4)                              | 112 (20.6)                              | 11 (2.0)                                | 1.05 (0.79 - 1.38)                                  | 0.7575                                     |
| 98 (17.9)                            | 186 (34.1)                              | 273 (50.0)                              | 87 (15.9)                               | 1.03 (0.84 - 1.25)                                  | 0.8037                                     |
| 109 (19.9)                           | 168 (30.7)                              | 268 (49.0)                              | 111 (20.3)                              | 0.98 (0.81 - 1.19)                                  | 0.8401                                     |
| 1 (0.2)                              | 495 (90.8)                              | 49 (9.0)                                | 1 (0.2)                                 | 1.26 (0.79 - 2.00)                                  | 0.3382                                     |
| 5 (0.9)                              | 433 (79.3)                              | 103 (18.9)                              | 10 (1.8)                                | 1.05 (0.79 - 1.40)                                  | 0.7172                                     |
| 1 (0.2)                              | 443 (81.3)                              | 100 (18.3)                              | 2 (0.4)                                 | 1.05 (0.74 - 1.47)                                  | 0.7983                                     |
| 31 (5.7)                             | 311 (57.3)                              | 202 (37.2)                              | 30 (5.5)                                | 1.07 (0.85 - 1.34)                                  | 0.5683                                     |
| 4 (0.7)                              | 473 (86.6)                              | 69 (12.6)                               | 4 (0.7)                                 | 1.33 (0.92 - 1.94)                                  | 0.1316                                     |
| 8 (1.5)                              | 432 (79.0)                              | 104 (19.0)                              | 11 (2.0)                                | 1.15 (0.86 - 1.54)                                  | 0.3354                                     |
| 23 (4.2)                             | 366 (67.3)                              | 161 (29.6)                              | 17 (3.1)                                | 0.95 (0.73 - 1.23)                                  | 0.7022                                     |
| 42 (7.7)                             | 282 (51.8)                              | 224 (41.2)                              | 38 (7.0)                                | 0.90 (0.73 - 1.12)                                  | 0.3567                                     |
| 16 (2.9)                             | 371 (67.8)                              | 159 (29.1)                              | 17 (3.1)                                | 1.09 (0.85 - 1.38)                                  | 0.4977                                     |
| 128 (23.4)                           | 140 (25.5)                              | 292 (53.3)                              | 116 (21.2)                              | 1.01 (0.83 - 1.22)                                  | 0.9498                                     |
| 2 (0.4)                              | 481 (87.9)                              | 65 (11.9)                               | 1 (0.2)                                 | 0.96 (0.65 - 1.43)                                  | 0.8403                                     |
| 145 (26.6)                           | 140 (25.7)                              | 255 (46.8)                              | 150 (27.5)                              | 0.98 (0.82 - 1.18)                                  | 0.851                                      |
| 9 (1.6)                              | 434 (79.3)                              | 108 (19.7)                              | 5 (0.9)                                 | 0.89 (0.66 - 1.20)                                  | 0.4451                                     |
| 105 (19.2)                           | 162 (29.6)                              | 274 (50.1)                              | 111 (20.3)                              | 0.92 (0.75 - 1.12)                                  | 0.4132                                     |
| 34 (6.2)                             | 313 (57.2)                              | 206 (37.7)                              | 28 (5.1)                                | 0.98 (0.79 - 1.22)                                  | 0.8627                                     |
| 13 (2.4)                             | 401 (73.3)                              | 134 (24.5)                              | 12 (2.2)                                | 1.31 (1.01 - 1.70)                                  | 0.0389                                     |
| 57 (10.5)                            | 243 (44.6)                              | 247 (45.3)                              | 55 (10.1)                               | 0.96 (0.79 - 1.17)                                  | 0.7018                                     |
| 27 (5.0)                             | 339 (62.4)                              | 185 (34.1)                              | 19 (3.5)                                | 1.08 (0.85 - 1.36)                                  | 0.5414                                     |
| 47 (8.6)                             | 287 (52.4)                              | 215 (39.2)                              | 46 (8.4)                                | 0.92 (0.74 - 1.14)                                  | 0.45                                       |
| 142 (26.0)                           | 137 (25.1)                              | 272 (49.8)                              | 137 (25.1)                              | 1.03 (0.84 - 1.25)                                  | 0.7959                                     |
| 80 (14.6)                            | 202 (36.9)                              | 255 (46.6)                              | 90 (16.5)                               | 1.04 (0.85 - 1.27)                                  | 0.712                                      |
| 18 (3.3)                             | 358 (65.4)                              | 175 (32.0)                              | 14 (2.6)                                | 0.97 (0.76 - 1.25)                                  | 0.8406                                     |
| 64 (11.7)                            | 229 (42.0)                              | 249 (45.7)                              | 67 (12.3)                               | 0.95 (0.77 - 1.16)                                  | 0.5966                                     |
| 14 (2.6)                             | 390 (71.6)                              | 141 (25.9)                              | 14 (2.6)                                | 0.99 (0.76 - 1.29)                                  | 0.9483                                     |
| 22 (4.0)                             | 334 (61.3)                              | 186 (34.1)                              | 25 (4.6)                                | 0.87 (0.68 - 1.11)                                  | 0.2526                                     |
| 6 (1.1)                              | 489 (90.9)                              | 40 (7.4)                                | 9 (1.7)                                 | 1.18 (0.78 - 1.79)                                  | 0.4416                                     |
| 11 (2.0)                             | 446 (81.4)                              | 93 (17.0)                               | 9 (1.6)                                 | 1.03 (0.75 - 1.42)                                  | 0.8543                                     |
| 10 (1.8)                             | 464 (85.0)                              | 78 (14.3)                               | 4 (0.7)                                 | 1.64 (1.17 - 2.31)                                  | 0.0041                                     |
| 2 (0.4)                              | 463 (85.0)                              | 73 (13.4)                               | 9 (1.7)                                 | 0.74 (0.51 - 1.07)                                  | 0.1109                                     |
| 1 (0.2)                              | 506 (92.5)                              | 41 (7.5)                                | 0 (0.0)                                 | 0.59 (0.34 - 1.05)                                  | 0.0745                                     |
| 1 (0.2)                              | 462 (84.5)                              | 82 (15.0)                               | 3 (0.5)                                 | 1.07 (0.74 - 1.54)                                  | 0.7105                                     |
| 49 (9.0)                             | 241 (44.2)                              | 243 (44.6)                              | 61 (11.2)                               | 0.87 (0.71 - 1.07)                                  | 0.1911                                     |
| 20 (3.7)                             | 344 (63.0)                              | 180 (33.0)                              | 22 (4.0)                                | 0.86 (0.67 - 1.10)                                  | 0.2277                                     |
| 81 (14.8)                            | 174 (31.9)                              | 278 (50.9)                              | 94 (17.2)                               | 0.81 (0.66 - 0.99)                                  | 0.0371                                     |
| 129 (23.6)                           | 154 (28.2)                              | 267 (48.8)                              | 126 (23.0)                              | 1.02 (0.85 - 1.22)                                  | 0.8627                                     |
| 45 (8.2)                             | 293 (53.5)                              | 228 (41.6)                              | 27 (4.9)                                | 1.13 (0.91 - 1.41)                                  | 0.2624                                     |
| 39 (7.2)                             | 280 (51.5)                              | 222 (40.8)                              | 42 (7.7)                                | 1.09 (0.88 - 1.34)                                  | 0.4477                                     |
| 7 (1.3)                              | 421 (77.4)                              | 117 (21.5)                              | 6 (1.1)                                 | 1.29 (0.97 - 1.71)                                  | 0.0767                                     |

|            |            |            |            |                    |        |
|------------|------------|------------|------------|--------------------|--------|
| 9 (1.6)    | 422 (77.3) | 111 (20.3) | 13 (2.4)   | 1.21 (0.91 - 1.61) | 0.1816 |
| 47 (8.6)   | 276 (50.5) | 228 (41.8) | 42 (7.7)   | 0.99 (0.80 - 1.22) | 0.9198 |
| 34 (6.2)   | 328 (60.2) | 189 (34.7) | 28 (5.1)   | 1.15 (0.92 - 1.45) | 0.2179 |
| 24 (4.4)   | 313 (57.2) | 205 (37.5) | 29 (5.3)   | 0.78 (0.61 - 0.99) | 0.0407 |
| 55 (10.1)  | 259 (47.5) | 223 (40.9) | 63 (11.6)  | 0.91 (0.75 - 1.12) | 0.3808 |
| 101 (18.6) | 185 (34.0) | 262 (48.2) | 97 (17.8)  | 1.19 (0.97 - 1.46) | 0.0906 |
| 28 (5.1)   | 308 (56.4) | 215 (39.4) | 23 (4.2)   | 0.87 (0.69 - 1.11) | 0.2755 |
| 17 (3.1)   | 367 (67.0) | 162 (29.6) | 19 (3.5)   | 1.02 (0.79 - 1.31) | 0.895  |
| 15 (2.7)   | 383 (70.0) | 150 (27.4) | 14 (2.6)   | 1.08 (0.84 - 1.38) | 0.5639 |
| 54 (9.9)   | 259 (47.5) | 239 (43.9) | 47 (8.6)   | 1.08 (0.88 - 1.33) | 0.4618 |
| 2 (0.4)    | 440 (80.6) | 104 (19.0) | 2 (0.4)    | 0.91 (0.63 - 1.29) | 0.5832 |
| 42 (7.7)   | 282 (51.6) | 223 (40.8) | 42 (7.7)   | 1.08 (0.88 - 1.34) | 0.4537 |
| 2 (0.4)    | 448 (82.2) | 95 (17.4)  | 2 (0.4)    | 0.92 (0.64 - 1.32) | 0.6371 |
| 16 (2.9)   | 398 (73.0) | 138 (25.3) | 9 (1.7)    | 1.13 (0.86 - 1.48) | 0.3731 |
| 47 (8.6)   | 262 (48.1) | 234 (42.9) | 49 (9.0)   | 0.94 (0.76 - 1.18) | 0.6101 |
| 8 (1.5)    | 416 (76.6) | 121 (22.3) | 6 (1.1)    | 0.95 (0.72 - 1.26) | 0.7233 |
| 11 (2.0)   | 353 (64.5) | 178 (32.5) | 16 (2.9)   | 0.88 (0.68 - 1.15) | 0.3439 |
| 6 (1.1)    | 462 (84.8) | 78 (14.3)  | 5 (0.9)    | 1.48 (1.06 - 2.06) | 0.0226 |
| 131 (23.9) | 160 (29.3) | 257 (47.0) | 130 (23.8) | 1.11 (0.92 - 1.35) | 0.2835 |
| 77 (14.1)  | 238 (43.5) | 241 (44.1) | 68 (12.4)  | 1.06 (0.88 - 1.29) | 0.5299 |
| 121 (22.1) | 161 (29.4) | 261 (47.7) | 125 (22.9) | 0.95 (0.78 - 1.14) | 0.5622 |
| 20 (3.6)   | 359 (65.5) | 173 (31.6) | 16 (2.9)   | 1.09 (0.85 - 1.39) | 0.4927 |
| 47 (8.6)   | 268 (49.0) | 234 (42.8) | 45 (8.2)   | 0.97 (0.79 - 1.20) | 0.7981 |
| 34 (6.3)   | 306 (56.3) | 204 (37.5) | 34 (6.3)   | 1.02 (0.81 - 1.28) | 0.8637 |
| 19 (3.5)   | 336 (61.5) | 185 (33.9) | 25 (4.6)   | 1.12 (0.86 - 1.44) | 0.403  |
| 11 (2.0)   | 385 (70.9) | 146 (26.9) | 12 (2.2)   | 0.77 (0.57 - 1.04) | 0.0864 |
| 16 (2.9)   | 411 (75.1) | 125 (22.9) | 11 (2.0)   | 1.44 (1.09 - 1.90) | 0.0107 |
| 2 (0.4)    | 456 (83.7) | 85 (15.6)  | 4 (0.7)    | 0.65 (0.44 - 0.96) | 0.0292 |
| 26 (4.7)   | 330 (60.2) | 190 (34.7) | 28 (5.1)   | 1.04 (0.83 - 1.32) | 0.7158 |
| 60 (11.0)  | 232 (42.6) | 238 (43.7) | 75 (13.8)  | 0.78 (0.64 - 0.95) | 0.0154 |
| 29 (5.3)   | 316 (58.2) | 205 (37.8) | 22 (4.1)   | 1.03 (0.81 - 1.31) | 0.8097 |
| 18 (3.3)   | 350 (64.0) | 178 (32.5) | 19 (3.5)   | 0.91 (0.71 - 1.17) | 0.4501 |
| 3 (0.5)    | 474 (86.8) | 65 (11.9)  | 7 (1.3)    | 0.70 (0.47 - 1.04) | 0.0776 |
| 59 (10.8)  | 226 (41.3) | 265 (48.4) | 56 (10.2)  | 0.92 (0.75 - 1.12) | 0.4118 |
| 3 (0.5)    | 491 (89.8) | 54 (9.9)   | 2 (0.4)    | 0.90 (0.60 - 1.35) | 0.6163 |
| 38 (7.0)   | 294 (54.2) | 205 (37.8) | 43 (7.9)   | 1.05 (0.83 - 1.34) | 0.6712 |
| 0 (0.0)    | 471 (86.1) | 76 (13.9)  | 0 (0.0)    | 0.90 (0.60 - 1.35) | 0.6119 |
| 3 (0.6)    | 491 (90.3) | 52 (9.6)   | 1 (0.2)    | 1.18 (0.80 - 1.75) | 0.4106 |
| 5 (0.9)    | 484 (88.3) | 63 (11.5)  | 1 (0.2)    | 1.50 (0.98 - 2.30) | 0.0602 |
| 2 (0.4)    | 457 (83.5) | 86 (15.7)  | 4 (0.7)    | 0.79 (0.55 - 1.13) | 0.2005 |
| 2 (0.4)    | 479 (88.1) | 62 (11.4)  | 3 (0.6)    | 0.73 (0.48 - 1.11) | 0.1419 |
| 6 (1.1)    | 399 (72.8) | 140 (25.5) | 9 (1.6)    | 0.87 (0.65 - 1.15) | 0.3188 |
| 3 (0.5)    | 451 (82.6) | 88 (16.1)  | 7 (1.3)    | 1.31 (0.95 - 1.82) | 0.1015 |
| 2 (0.4)    | 430 (78.6) | 107 (19.6) | 10 (1.8)   | 0.97 (0.71 - 1.33) | 0.8706 |
| 11 (2.0)   | 410 (75.1) | 124 (22.7) | 12 (2.2)   | 1.32 (1.01 - 1.71) | 0.0386 |
| 6 (1.1)    | 420 (76.6) | 120 (21.9) | 8 (1.5)    | 1.08 (0.81 - 1.45) | 0.6073 |
| 7 (1.3)    | 470 (85.9) | 74 (13.5)  | 3 (0.5)    | 1.58 (1.13 - 2.22) | 0.0073 |
| 112 (20.5) | 164 (30.0) | 279 (51.0) | 104 (19.0) | 1.11 (0.91 - 1.34) | 0.3012 |
| 3 (0.5)    | 435 (79.5) | 104 (19.0) | 8 (1.5)    | 0.90 (0.66 - 1.23) | 0.5183 |
| 91 (16.6)  | 187 (34.2) | 260 (47.5) | 100 (18.3) | 0.96 (0.79 - 1.16) | 0.6617 |
| 3 (0.5)    | 477 (87.0) | 67 (12.2)  | 4 (0.7)    | 1.15 (0.78 - 1.71) | 0.4761 |
| 11 (2.0)   | 400 (73.8) | 132 (24.4) | 10 (1.8)   | 1.22 (0.93 - 1.61) | 0.1496 |
| 89 (16.4)  | 186 (34.3) | 256 (47.2) | 100 (18.5) | 0.94 (0.77 - 1.13) | 0.4944 |

|            |            |            |            |                    |        |
|------------|------------|------------|------------|--------------------|--------|
| 1 (0.2)    | 461 (84.3) | 80 (14.6)  | 6 (1.1)    | 1.20 (0.85 - 1.70) | 0.29   |
| 111 (20.3) | 181 (33.2) | 247 (45.2) | 118 (21.6) | 1.03 (0.86 - 1.24) | 0.7434 |
| 38 (6.9)   | 289 (52.8) | 215 (39.3) | 43 (7.9)   | 0.91 (0.74 - 1.13) | 0.4147 |
| 82 (15.1)  | 200 (36.8) | 262 (48.2) | 82 (15.1)  | 0.93 (0.76 - 1.13) | 0.4644 |
| 123 (22.6) | 138 (25.3) | 270 (49.5) | 137 (25.1) | 0.92 (0.76 - 1.11) | 0.3833 |
| 64 (11.7)  | 237 (43.3) | 241 (44.1) | 69 (12.6)  | 0.89 (0.73 - 1.08) | 0.2255 |
| 8 (1.5)    | 466 (85.0) | 78 (14.2)  | 4 (0.7)    | 1.49 (1.07 - 2.07) | 0.0189 |
| 1 (0.2)    | 475 (87.2) | 68 (12.5)  | 2 (0.4)    | 0.90 (0.60 - 1.35) | 0.6077 |
| 3 (0.6)    | 453 (83.7) | 84 (15.5)  | 4 (0.7)    | 1.02 (0.71 - 1.45) | 0.9237 |
| 1 (0.2)    | 474 (86.8) | 69 (12.6)  | 3 (0.5)    | 0.94 (0.63 - 1.40) | 0.7631 |
| 46 (8.4)   | 274 (50.1) | 221 (40.4) | 52 (9.5)   | 0.88 (0.72 - 1.08) | 0.2379 |
| 31 (5.7)   | 277 (50.8) | 237 (43.5) | 31 (5.7)   | 0.93 (0.75 - 1.16) | 0.5334 |
| 2 (0.4)    | 472 (86.3) | 72 (13.2)  | 3 (0.5)    | 1.18 (0.81 - 1.71) | 0.3936 |
| 31 (5.7)   | 318 (58.0) | 202 (36.9) | 28 (5.1)   | 1.01 (0.80 - 1.27) | 0.9553 |
| 1 (0.2)    | 499 (91.2) | 48 (8.8)   | 0 (0.0)    | 0.72 (0.44 - 1.17) | 0.1855 |
| 64 (11.7)  | 222 (40.6) | 256 (46.8) | 69 (12.6)  | 1.03 (0.84 - 1.26) | 0.7903 |
| 3 (0.5)    | 461 (84.1) | 87 (15.9)  | 0 (0.0)    | 1.14 (0.80 - 1.62) | 0.475  |
| 4 (0.7)    | 449 (82.4) | 89 (16.3)  | 7 (1.3)    | 1.01 (0.74 - 1.39) | 0.9278 |
| 115 (21.0) | 152 (27.8) | 287 (52.5) | 108 (19.7) | 1.03 (0.85 - 1.25) | 0.7678 |
| 16 (2.9)   | 402 (73.6) | 127 (23.3) | 17 (3.1)   | 1.15 (0.87 - 1.52) | 0.3411 |
| 23 (4.2)   | 364 (66.9) | 156 (28.7) | 24 (4.4)   | 1.26 (0.98 - 1.63) | 0.0717 |
| 28 (5.1)   | 359 (65.5) | 160 (29.2) | 29 (5.3)   | 1.24 (0.97 - 1.59) | 0.0919 |
| 36 (6.6)   | 280 (51.2) | 225 (41.1) | 42 (7.7)   | 0.99 (0.79 - 1.24) | 0.9374 |
| 39 (7.1)   | 281 (51.5) | 230 (42.1) | 35 (6.4)   | 0.99 (0.79 - 1.23) | 0.9181 |
| 67 (12.2)  | 214 (39.1) | 265 (48.4) | 68 (12.4)  | 1.02 (0.84 - 1.25) | 0.8359 |
| 2 (0.4)    | 493 (90.0) | 54 (9.9)   | 1 (0.2)    | 1.00 (0.65 - 1.54) | 0.9898 |
| 79 (14.4)  | 194 (35.5) | 265 (48.4) | 88 (16.1)  | 0.98 (0.80 - 1.21) | 0.8735 |
| 40 (7.3)   | 282 (51.6) | 223 (40.8) | 41 (7.5)   | 0.92 (0.74 - 1.14) | 0.4398 |
| 24 (4.4)   | 320 (58.5) | 200 (36.6) | 27 (4.9)   | 0.85 (0.67 - 1.08) | 0.178  |
| 17 (3.1)   | 404 (74.0) | 125 (22.9) | 17 (3.1)   | 1.19 (0.90 - 1.58) | 0.2156 |
| 24 (4.4)   | 356 (65.1) | 157 (28.7) | 34 (6.2)   | 1.08 (0.85 - 1.37) | 0.5361 |
| 24 (4.4)   | 375 (68.7) | 149 (27.3) | 22 (4.0)   | 1.20 (0.94 - 1.54) | 0.1423 |
| 13 (2.4)   | 419 (76.9) | 115 (21.1) | 11 (2.0)   | 1.27 (0.94 - 1.72) | 0.1217 |
| 15 (2.7)   | 411 (75.3) | 120 (22.0) | 15 (2.7)   | 1.29 (0.96 - 1.72) | 0.0876 |
| 1 (0.2)    | 507 (92.9) | 39 (7.1)   | 0 (0.0)    | 1.12 (0.70 - 1.80) | 0.6236 |
| 2 (0.4)    | 480 (87.8) | 62 (11.3)  | 5 (0.9)    | 1.02 (0.69 - 1.52) | 0.9096 |

| PD susceptibility: Men<br>Dominant Model<br>OR (95%CI) | PD susceptibility: Men<br>Dominant<br>P-<br>value | PD susceptibility: Men<br>Recessive Model<br>OR (95%CI) | PD susceptibility: Men<br>Recessive<br>P-<br>value | Women<br>Genotype n(%)<br>1/1<br>Cases | Women<br>Genotype n(%)<br>1/2<br>Cases |
|--------------------------------------------------------|---------------------------------------------------|---------------------------------------------------------|----------------------------------------------------|----------------------------------------|----------------------------------------|
| 0.94 (0.71 - 1.24)                                     | 0.6747                                            | 1.10 (0.75 - 1.61)                                      | 0.6107                                             | 126 (39.6)                             | 139 (43.7)                             |
| 1.01 (0.76 - 1.34)                                     | 0.9552                                            | 1.06 (0.76 - 1.47)                                      | 0.7362                                             | 111 (34.3)                             | 161 (49.7)                             |
| 0.95 (0.66 - 1.36)                                     | 0.7754                                            | 1.01 (0.29 - 3.50)                                      | 0.9858                                             | 277 (85.0)                             | 47 (14.4)                              |
| 1.32 (0.78 - 2.22)                                     | 0.2954                                            | 0.00 (0.00 - )                                          | 0.9797                                             | 291 (89.8)                             | 33 (10.2)                              |
| 0.98 (0.72 - 1.32)                                     | 0.8719                                            | 1.03 (0.75 - 1.43)                                      | 0.8483                                             | 90 (27.7)                              | 169 (52.0)                             |
| 1.05 (0.79 - 1.39)                                     | 0.7332                                            | 0.97 (0.70 - 1.36)                                      | 0.8683                                             | 107 (32.8)                             | 168 (51.5)                             |
| 0.97 (0.72 - 1.31)                                     | 0.8644                                            | 0.98 (0.71 - 1.34)                                      | 0.8819                                             | 87 (26.8)                              | 179 (55.1)                             |
| 1.04 (0.76 - 1.42)                                     | 0.7911                                            | 1.14 (0.41 - 3.14)                                      | 0.8035                                             | 239 (73.8)                             | 81 (25.0)                              |
| 0.94 (0.70 - 1.25)                                     | 0.6582                                            | 1.17 (0.84 - 1.64)                                      | 0.3493                                             | 113 (34.9)                             | 162 (50.0)                             |
| 0.97 (0.72 - 1.31)                                     | 0.8637                                            | 0.98 (0.71 - 1.34)                                      | 0.8824                                             | 87 (26.8)                              | 178 (54.8)                             |
| 1.27 (0.79 - 2.05)                                     | 0.3254                                            | 1.02 (0.06 - )                                          | 0.9906                                             | 288 (88.6)                             | 34 (10.5)                              |
| 1.14 (0.83 - 1.56)                                     | 0.4189                                            | 0.49 (0.17 - 1.43)                                      | 0.1924                                             | 239 (73.5)                             | 82 (25.2)                              |
| 1.07 (0.75 - 1.52)                                     | 0.724                                             | 0.50 (0.05 - 5.49)                                      | 0.5684                                             | 266 (82.4)                             | 55 (17.0)                              |
| 1.09 (0.83 - 1.42)                                     | 0.541                                             | 1.04 (0.58 - 1.87)                                      | 0.8833                                             | 195 (60.0)                             | 113 (34.8)                             |
| 1.37 (0.93 - 2.03)                                     | 0.114                                             | 1.00 (0.14 - 7.09)                                      | 0.9992                                             | 275 (84.4)                             | 46 (14.1)                              |
| 1.23 (0.90 - 1.69)                                     | 0.1956                                            | 0.57 (0.17 - 1.94)                                      | 0.3662                                             | 248 (76.3)                             | 68 (20.9)                              |
| 0.88 (0.65 - 1.17)                                     | 0.3775                                            | 1.61 (0.73 - 3.55)                                      | 0.2384                                             | 212 (65.0)                             | 101 (31.0)                             |
| 0.83 (0.64 - 1.08)                                     | 0.1613                                            | 1.15 (0.69 - 1.94)                                      | 0.5867                                             | 166 (51.2)                             | 131 (40.4)                             |
| 1.12 (0.86 - 1.48)                                     | 0.3988                                            | 0.92 (0.42 - 2.01)                                      | 0.8282                                             | 214 (65.6)                             | 94 (28.8)                              |
| 0.88 (0.66 - 1.19)                                     | 0.413                                             | 1.15 (0.85 - 1.55)                                      | 0.358                                              | 85 (26.2)                              | 155 (47.7)                             |
| 0.94 (0.62 - 1.41)                                     | 0.755                                             | 1.98 (0.18 - )                                          | 0.5776                                             | 285 (88.0)                             | 36 (11.1)                              |
| 1.01 (0.75 - 1.35)                                     | 0.9554                                            | 0.95 (0.70 - 1.28)                                      | 0.7168                                             | 81 (25.1)                              | 169 (52.3)                             |
| 0.82 (0.59 - 1.14)                                     | 0.2436                                            | 1.80 (0.60 - 5.38)                                      | 0.2906                                             | 276 (84.7)                             | 47 (14.4)                              |
| 0.90 (0.67 - 1.20)                                     | 0.4538                                            | 0.91 (0.64 - 1.30)                                      | 0.6018                                             | 111 (34.2)                             | 159 (48.9)                             |
| 0.92 (0.70 - 1.20)                                     | 0.5445                                            | 1.21 (0.73 - 2.02)                                      | 0.4595                                             | 179 (55.1)                             | 126 (38.8)                             |
| 1.40 (1.05 - 1.88)                                     | 0.0232                                            | 1.09 (0.48 - 2.47)                                      | 0.8354                                             | 210 (65.0)                             | 103 (31.9)                             |
| 0.92 (0.71 - 1.19)                                     | 0.5267                                            | 1.05 (0.68 - 1.61)                                      | 0.8295                                             | 142 (43.7)                             | 141 (43.4)                             |
| 1.02 (0.77 - 1.35)                                     | 0.8821                                            | 1.54 (0.80 - 2.95)                                      | 0.1949                                             | 201 (62.0)                             | 109 (33.6)                             |
| 0.87 (0.67 - 1.14)                                     | 0.3072                                            | 1.04 (0.64 - 1.69)                                      | 0.8848                                             | 183 (56.5)                             | 119 (36.7)                             |
| 1.00 (0.74 - 1.35)                                     | 0.9935                                            | 1.07 (0.78 - 1.47)                                      | 0.6687                                             | 82 (25.2)                              | 168 (51.7)                             |
| 1.18 (0.90 - 1.56)                                     | 0.2322                                            | 0.83 (0.56 - 1.22)                                      | 0.3343                                             | 112 (34.4)                             | 168 (51.5)                             |
| 0.93 (0.71 - 1.23)                                     | 0.6149                                            | 1.36 (0.62 - 2.96)                                      | 0.4388                                             | 219 (67.4)                             | 102 (31.4)                             |
| 0.93 (0.71 - 1.22)                                     | 0.6184                                            | 0.94 (0.63 - 1.40)                                      | 0.7558                                             | 159 (48.9)                             | 135 (41.5)                             |
| 0.99 (0.74 - 1.33)                                     | 0.9403                                            | 1.00 (0.46 - 2.16)                                      | 0.9978                                             | 243 (74.8)                             | 72 (22.2)                              |
| 0.85 (0.65 - 1.13)                                     | 0.262                                             | 0.83 (0.41 - 1.69)                                      | 0.613                                              | 202 (62.0)                             | 106 (32.5)                             |
| 1.35 (0.84 - 2.19)                                     | 0.22                                              | 0.51 (0.13 - 2.05)                                      | 0.3441                                             | 285 (88.8)                             | 29 (9.0)                               |
| 1.00 (0.71 - 1.42)                                     | 0.9812                                            | 1.40 (0.44 - 4.41)                                      | 0.5664                                             | 255 (78.2)                             | 68 (20.9)                              |
| 1.62 (1.13 - 2.33)                                     | 0.0093                                            | 2.97 (0.80 - )                                          | 0.103                                              | 273 (83.7)                             | 51 (15.6)                              |
| 0.81 (0.54 - 1.21)                                     | 0.2997                                            | 0.13 (0.02 - 1.00)                                      | 0.0505                                             | 280 (87.0)                             | 39 (12.1)                              |
| 0.55 (0.30 - 0.99)                                     | 0.0481                                            | 527867.9 (0.00 - )                                      | 0.9857                                             | 306 (93.9)                             | 20 (6.1)                               |
| 1.12 (0.77 - 1.63)                                     | 0.5636                                            | 0.33 (0.03 - 3.19)                                      | 0.3394                                             | 281 (86.2)                             | 42 (12.9)                              |
| 0.88 (0.68 - 1.16)                                     | 0.3689                                            | 0.75 (0.48 - 1.15)                                      | 0.1881                                             | 160 (49.5)                             | 135 (41.8)                             |
| 0.84 (0.64 - 1.11)                                     | 0.2255                                            | 0.86 (0.41 - 1.81)                                      | 0.6851                                             | 217 (67.2)                             | 97 (30.0)                              |
| 0.75 (0.57 - 1.00)                                     | 0.0463                                            | 0.79 (0.54 - 1.15)                                      | 0.2209                                             | 116 (36.0)                             | 147 (45.7)                             |
| 1.00 (0.76 - 1.33)                                     | 0.9848                                            | 1.05 (0.76 - 1.43)                                      | 0.7834                                             | 97 (29.9)                              | 161 (49.7)                             |
| 1.02 (0.78 - 1.34)                                     | 0.8784                                            | 1.85 (1.09 - 3.15)                                      | 0.0228                                             | 160 (49.2)                             | 143 (44.0)                             |
| 1.18 (0.90 - 1.55)                                     | 0.2369                                            | 0.91 (0.56 - 1.48)                                      | 0.7054                                             | 153 (47.1)                             | 142 (43.7)                             |
| 1.35 (0.99 - 1.85)                                     | 0.0586                                            | 1.16 (0.39 - 3.44)                                      | 0.7944                                             | 241 (74.4)                             | 79 (24.4)                              |

|                    |        |                    |        |            |            |
|--------------------|--------|--------------------|--------|------------|------------|
| 1.35 (0.98 - 1.86) | 0.0662 | 0.64 (0.25 - 1.64) | 0.3504 | 235 (72.5) | 78 (24.1)  |
| 0.93 (0.71 - 1.23) | 0.6297 | 1.16 (0.72 - 1.86) | 0.5467 | 148 (45.7) | 152 (46.9) |
| 1.16 (0.88 - 1.52) | 0.2933 | 1.33 (0.73 - 2.41) | 0.352  | 200 (61.3) | 110 (33.7) |
| 0.75 (0.56 - 0.99) | 0.0406 | 0.79 (0.43 - 1.44) | 0.4458 | 184 (56.6) | 126 (38.8) |
| 0.92 (0.70 - 1.20) | 0.537  | 0.84 (0.55 - 1.27) | 0.4048 | 171 (52.6) | 122 (37.5) |
| 1.41 (1.04 - 1.91) | 0.0279 | 1.06 (0.76 - 1.48) | 0.726  | 100 (30.8) | 156 (48.0) |
| 0.78 (0.59 - 1.04) | 0.0953 | 1.32 (0.69 - 2.52) | 0.4066 | 201 (61.7) | 105 (32.2) |
| 1.05 (0.78 - 1.41) | 0.7508 | 0.87 (0.43 - 1.75) | 0.7006 | 210 (64.4) | 112 (34.4) |
| 1.09 (0.82 - 1.46) | 0.549  | 1.08 (0.49 - 2.37) | 0.8489 | 220 (68.1) | 97 (30.0)  |
| 1.06 (0.82 - 1.38) | 0.6382 | 1.20 (0.76 - 1.90) | 0.4216 | 128 (39.5) | 166 (51.2) |
| 0.90 (0.63 - 1.29) | 0.5828 | 0.96 (0.06 -       | 0.9761 | 273 (84.0) | 51 (15.7)  |
| 1.14 (0.87 - 1.49) | 0.3376 | 1.00 (0.62 - 1.62) | 0.9991 | 151 (46.3) | 145 (44.5) |
| 0.91 (0.63 - 1.32) | 0.6369 | 0.96 (0.06 -       | 0.9769 | 276 (84.9) | 48 (14.8)  |
| 1.08 (0.79 - 1.47) | 0.6299 | 1.87 (0.79 - 4.40) | 0.1543 | 240 (73.8) | 79 (24.3)  |
| 0.93 (0.70 - 1.23) | 0.6127 | 0.94 (0.59 - 1.51) | 0.8066 | 149 (45.7) | 144 (44.2) |
| 0.92 (0.67 - 1.25) | 0.5856 | 1.33 (0.46 - 3.85) | 0.5935 | 246 (76.2) | 75 (23.2)  |
| 0.91 (0.68 - 1.21) | 0.5004 | 0.55 (0.20 - 1.47) | 0.2323 | 229 (70.2) | 88 (27.0)  |
| 1.56 (1.08 - 2.24) | 0.0165 | 1.25 (0.34 - 4.66) | 0.7381 | 255 (78.5) | 66 (20.3)  |
| 1.28 (0.95 - 1.74) | 0.1098 | 1.01 (0.74 - 1.38) | 0.9431 | 86 (26.5)  | 160 (49.2) |
| 1.04 (0.79 - 1.36) | 0.7923 | 1.18 (0.81 - 1.72) | 0.3885 | 134 (41.2) | 150 (46.2) |
| 0.91 (0.68 - 1.23) | 0.5504 | 0.95 (0.69 - 1.30) | 0.748  | 89 (27.4)  | 178 (54.8) |
| 1.08 (0.81 - 1.44) | 0.6066 | 1.28 (0.64 - 2.58) | 0.4838 | 217 (66.6) | 94 (28.8)  |
| 0.94 (0.72 - 1.23) | 0.6372 | 1.06 (0.67 - 1.67) | 0.8108 | 141 (43.3) | 159 (48.8) |
| 1.03 (0.78 - 1.36) | 0.8313 | 1.00 (0.58 - 1.72) | 0.9953 | 162 (49.8) | 140 (43.1) |
| 1.24 (0.92 - 1.67) | 0.1566 | 0.70 (0.35 - 1.39) | 0.3083 | 194 (59.9) | 112 (34.6) |
| 0.74 (0.53 - 1.02) | 0.0688 | 0.88 (0.32 - 2.41) | 0.7973 | 246 (75.9) | 74 (22.8)  |
| 1.48 (1.08 - 2.01) | 0.0134 | 1.62 (0.67 - 3.90) | 0.2855 | 235 (72.3) | 83 (25.5)  |
| 0.63 (0.41 - 0.96) | 0.0305 | 0.50 (0.09 - 2.74) | 0.4249 | 259 (79.9) | 64 (19.8)  |
| 1.09 (0.82 - 1.44) | 0.561  | 0.91 (0.51 - 1.65) | 0.7619 | 178 (54.6) | 129 (39.6) |
| 0.73 (0.55 - 0.95) | 0.0207 | 0.74 (0.50 - 1.10) | 0.135  | 145 (44.9) | 140 (43.3) |
| 0.97 (0.74 - 1.28) | 0.8364 | 1.46 (0.76 - 2.82) | 0.2562 | 181 (56.0) | 124 (38.4) |
| 0.90 (0.68 - 1.19) | 0.4417 | 0.93 (0.44 - 1.98) | 0.8468 | 203 (62.3) | 108 (33.1) |
| 0.71 (0.46 - 1.10) | 0.1245 | 0.33 (0.07 - 1.65) | 0.1782 | 291 (90.4) | 29 (9.0)   |
| 0.85 (0.65 - 1.10) | 0.2076 | 1.07 (0.70 - 1.64) | 0.7404 | 151 (46.5) | 134 (41.2) |
| 0.86 (0.56 - 1.34) | 0.513  | 1.48 (0.25 - 8.89) | 0.6664 | 292 (89.8) | 31 (9.5)   |
| 1.14 (0.85 - 1.53) | 0.3753 | 0.84 (0.49 - 1.42) | 0.5069 | 171 (52.9) | 123 (38.1) |
| 0.90 (0.60 - 1.35) | 0.6119 | ( - )              | --     | 284 (87.1) | 42 (12.9)  |
| 1.15 (0.76 - 1.75) | 0.509  | 3.04 (0.32 -       | 0.3353 | 286 (87.7) | 38 (11.7)  |
| 1.44 (0.92 - 2.26) | 0.1143 | 4.96 (0.58 -       | 0.1439 | 279 (85.6) | 45 (13.8)  |
| 0.80 (0.54 - 1.17) | 0.2475 | 0.33 (0.03 - 3.17) | 0.3364 | 276 (85.2) | 44 (13.6)  |
| 0.71 (0.45 - 1.12) | 0.1398 | 0.67 (0.11 - 3.99) | 0.6566 | 279 (86.1) | 45 (13.9)  |
| 0.88 (0.65 - 1.19) | 0.4029 | 0.63 (0.20 - 1.91) | 0.4107 | 224 (68.7) | 97 (29.8)  |
| 1.49 (1.04 - 2.14) | 0.0306 | 0.43 (0.11 - 1.65) | 0.2179 | 249 (76.6) | 67 (20.6)  |
| 1.09 (0.78 - 1.54) | 0.6054 | 0.20 (0.04 - 0.91) | 0.0377 | 239 (73.5) | 82 (25.2)  |
| 1.45 (1.07 - 1.94) | 0.0148 | 0.91 (0.38 - 2.14) | 0.8227 | 228 (70.2) | 93 (28.6)  |
| 1.13 (0.82 - 1.55) | 0.4667 | 0.72 (0.23 - 2.26) | 0.5699 | 243 (74.8) | 73 (22.5)  |
| 1.60 (1.12 - 2.30) | 0.0104 | 2.36 (0.61 - 9.13) | 0.2141 | 279 (85.6) | 43 (13.2)  |
| 1.15 (0.86 - 1.53) | 0.3458 | 1.12 (0.81 - 1.55) | 0.5002 | 108 (33.2) | 155 (47.7) |
| 0.96 (0.69 - 1.33) | 0.7915 | 0.28 (0.06 - 1.36) | 0.1153 | 262 (80.4) | 61 (18.7)  |
| 1.00 (0.75 - 1.33) | 0.9985 | 0.88 (0.63 - 1.23) | 0.4474 | 92 (28.2)  | 170 (52.1) |
| 1.20 (0.79 - 1.82) | 0.3917 | 0.76 (0.17 - 3.40) | 0.7182 | 269 (82.8) | 55 (16.9)  |
| 1.26 (0.93 - 1.70) | 0.1345 | 1.14 (0.41 - 3.16) | 0.7946 | 248 (76.3) | 68 (20.9)  |
| 0.97 (0.73 - 1.29) | 0.8243 | 0.85 (0.61 - 1.19) | 0.3499 | 92 (28.5)  | 167 (51.7) |

|                    |        |                    |        |            |            |
|--------------------|--------|--------------------|--------|------------|------------|
| 1.34 (0.93 - 1.92) | 0.1184 | 0.17 (0.02 - 1.41) | 0.1001 | 267 (81.9) | 53 (16.3)  |
| 1.15 (0.87 - 1.53) | 0.3196 | 0.91 (0.66 - 1.26) | 0.5701 | 119 (36.5) | 156 (47.9) |
| 0.91 (0.69 - 1.19) | 0.4957 | 0.86 (0.53 - 1.39) | 0.5361 | 185 (56.9) | 124 (38.2) |
| 0.86 (0.65 - 1.14) | 0.2902 | 1.00 (0.71 - 1.42) | 0.9917 | 133 (40.8) | 153 (46.9) |
| 0.95 (0.70 - 1.29) | 0.7498 | 0.84 (0.62 - 1.15) | 0.2761 | 76 (23.3)  | 157 (48.2) |
| 0.83 (0.64 - 1.09) | 0.179  | 0.91 (0.62 - 1.33) | 0.6256 | 156 (47.9) | 143 (43.9) |
| 1.49 (1.04 - 2.12) | 0.0282 | 2.36 (0.61 - 9.13) | 0.2141 | 276 (84.9) | 45 (13.8)  |
| 0.92 (0.61 - 1.39) | 0.6769 | 0.50 (0.05 - 5.51) | 0.5712 | 289 (89.2) | 34 (10.5)  |
| 1.04 (0.71 - 1.51) | 0.8427 | 0.75 (0.17 - 3.33) | 0.7011 | 278 (85.8) | 45 (13.9)  |
| 0.98 (0.65 - 1.48) | 0.9169 | 0.33 (0.03 - 3.20) | 0.3403 | 288 (88.3) | 37 (11.3)  |
| 0.85 (0.65 - 1.12) | 0.2473 | 0.87 (0.57 - 1.33) | 0.5182 | 182 (55.8) | 124 (38.0) |
| 0.90 (0.69 - 1.18) | 0.4555 | 1.00 (0.58 - 1.72) | 0.9917 | 190 (58.3) | 118 (36.2) |
| 1.21 (0.82 - 1.78) | 0.3286 | 0.67 (0.11 - 4.03) | 0.664  | 288 (88.6) | 36 (11.1)  |
| 0.98 (0.74 - 1.29) | 0.885  | 1.15 (0.63 - 2.09) | 0.6475 | 189 (58.0) | 121 (37.1) |
| 0.69 (0.42 - 1.13) | 0.1393 | 543269.0 (0.00 - ) | 0.9857 | 298 (91.7) | 26 (8.0)   |
| 1.10 (0.84 - 1.43) | 0.494  | 0.90 (0.60 - 1.35) | 0.6036 | 133 (40.8) | 143 (43.9) |
| 1.09 (0.76 - 1.57) | 0.6431 | 1475590 (0.00 - )  | 0.9838 | 273 (84.0) | 48 (14.8)  |
| 1.06 (0.76 - 1.50) | 0.7217 | 0.57 (0.17 - 1.96) | 0.3761 | 262 (80.4) | 62 (19.0)  |
| 0.99 (0.74 - 1.32) | 0.9291 | 1.11 (0.79 - 1.54) | 0.5523 | 95 (29.2)  | 162 (49.8) |
| 1.21 (0.88 - 1.67) | 0.2434 | 0.93 (0.44 - 1.99) | 0.8578 | 219 (67.4) | 94 (28.9)  |
| 1.37 (1.03 - 1.84) | 0.0333 | 0.94 (0.47 - 1.90) | 0.8653 | 196 (60.7) | 110 (34.1) |
| 1.38 (1.02 - 1.87) | 0.0363 | 0.96 (0.53 - 1.76) | 0.9031 | 186 (57.2) | 116 (35.7) |
| 1.05 (0.79 - 1.39) | 0.735  | 0.82 (0.50 - 1.35) | 0.4407 | 182 (55.8) | 120 (36.8) |
| 0.95 (0.73 - 1.24) | 0.6878 | 1.16 (0.68 - 1.96) | 0.5853 | 172 (52.8) | 125 (38.3) |
| 1.05 (0.80 - 1.39) | 0.7176 | 0.98 (0.67 - 1.43) | 0.9196 | 137 (42.0) | 144 (44.2) |
| 0.98 (0.62 - 1.54) | 0.9181 | 2.01 (0.18 - )     | 0.5688 | 300 (92.0) | 25 (7.7)   |
| 1.07 (0.80 - 1.44) | 0.6528 | 0.85 (0.59 - 1.24) | 0.401  | 109 (33.4) | 156 (47.9) |
| 0.88 (0.67 - 1.16) | 0.3637 | 0.97 (0.59 - 1.58) | 0.8909 | 177 (54.3) | 119 (36.5) |
| 0.82 (0.62 - 1.09) | 0.1765 | 0.86 (0.46 - 1.59) | 0.628  | 197 (60.8) | 115 (35.5) |
| 1.27 (0.92 - 1.76) | 0.1537 | 1.01 (0.48 - 2.11) | 0.9886 | 218 (67.3) | 94 (29.0)  |
| 1.24 (0.93 - 1.66) | 0.1401 | 0.64 (0.36 - 1.16) | 0.1452 | 189 (58.2) | 119 (36.6) |
| 1.26 (0.94 - 1.69) | 0.1164 | 1.11 (0.60 - 2.07) | 0.7341 | 198 (61.1) | 109 (33.6) |
| 1.31 (0.93 - 1.83) | 0.1198 | 1.25 (0.49 - 3.18) | 0.6334 | 227 (70.3) | 87 (26.9)  |
| 1.38 (0.99 - 1.92) | 0.0537 | 1.01 (0.45 - 2.24) | 0.987  | 225 (69.2) | 86 (26.5)  |
| 1.10 (0.68 - 1.77) | 0.7023 | 525685.8 (0.00 - ) | 0.9857 | 299 (91.7) | 27 (8.3)   |
| 1.10 (0.72 - 1.67) | 0.6635 | 0.25 (0.03 - 2.26) | 0.2188 | 286 (88.0) | 36 (11.1)  |

| Women<br>Genotype n(%)<br>2/2<br>Cases | Women<br>Genotype n(%)<br>1/1<br>Controls | Women<br>Genotype n(%)<br>1/2<br>Controls | Women<br>Genotype n(%)<br>2/2<br>Controls | PD susceptibility:<br>Women Trend Model<br>OR (95%CI) | PD susceptibility:<br>Women Trend P-<br>value |
|----------------------------------------|-------------------------------------------|-------------------------------------------|-------------------------------------------|-------------------------------------------------------|-----------------------------------------------|
| 53 (16.7)                              | 122 (38.4)                                | 142 (44.7)                                | 54 (17.0)                                 | 0.95 (0.74 - 1.22)                                    | 0.6958                                        |
| 52 (16.0)                              | 111 (34.3)                                | 161 (49.7)                                | 52 (16.0)                                 | 1.00 (0.78 - 1.28)                                    | 0.9872                                        |
| 2 (0.6)                                | 269 (82.5)                                | 54 (16.6)                                 | 3 (0.9)                                   | 0.81 (0.52 - 1.24)                                    | 0.3252                                        |
| 0 (0.0)                                | 291 (89.8)                                | 32 (9.9)                                  | 1 (0.3)                                   | 0.94 (0.50 - 1.80)                                    | 0.863                                         |
| 66 (20.3)                              | 93 (28.6)                                 | 161 (49.5)                                | 71 (21.8)                                 | 0.97 (0.75 - 1.25)                                    | 0.8068                                        |
| 51 (15.6)                              | 104 (31.9)                                | 162 (49.7)                                | 60 (18.4)                                 | 0.92 (0.71 - 1.19)                                    | 0.5134                                        |
| 59 (18.2)                              | 90 (27.7)                                 | 163 (50.2)                                | 72 (22.2)                                 | 0.93 (0.72 - 1.20)                                    | 0.5775                                        |
| 4 (1.2)                                | 240 (74.1)                                | 77 (23.8)                                 | 7 (2.2)                                   | 0.95 (0.67 - 1.34)                                    | 0.7616                                        |
| 49 (15.1)                              | 114 (35.2)                                | 163 (50.3)                                | 47 (14.5)                                 | 1.02 (0.79 - 1.32)                                    | 0.8677                                        |
| 60 (18.5)                              | 90 (27.7)                                 | 164 (50.5)                                | 71 (21.8)                                 | 0.95 (0.74 - 1.22)                                    | 0.669                                         |
| 3 (0.9)                                | 284 (87.4)                                | 39 (12.0)                                 | 2 (0.6)                                   | 0.88 (0.52 - 1.48)                                    | 0.6201                                        |
| 4 (1.2)                                | 249 (76.6)                                | 67 (20.6)                                 | 9 (2.8)                                   | 1.12 (0.75 - 1.67)                                    | 0.5819                                        |
| 2 (0.6)                                | 278 (86.1)                                | 43 (13.3)                                 | 2 (0.6)                                   | 1.45 (0.90 - 2.33)                                    | 0.131                                         |
| 17 (5.2)                               | 211 (64.9)                                | 98 (30.2)                                 | 16 (4.9)                                  | 1.20 (0.90 - 1.58)                                    | 0.2089                                        |
| 5 (1.5)                                | 270 (82.8)                                | 56 (17.2)                                 | 0 (0.0)                                   | 1.02 (0.64 - 1.63)                                    | 0.9427                                        |
| 9 (2.8)                                | 245 (75.4)                                | 77 (23.7)                                 | 3 (0.9)                                   | 1.07 (0.74 - 1.56)                                    | 0.7214                                        |
| 13 (4.0)                               | 220 (67.5)                                | 95 (29.1)                                 | 11 (3.4)                                  | 1.13 (0.81 - 1.58)                                    | 0.4823                                        |
| 27 (8.3)                               | 169 (52.2)                                | 131 (40.4)                                | 24 (7.4)                                  | 1.05 (0.80 - 1.39)                                    | 0.7171                                        |
| 18 (5.5)                               | 211 (64.7)                                | 106 (32.5)                                | 9 (2.8)                                   | 1.09 (0.80 - 1.48)                                    | 0.5791                                        |
| 85 (26.2)                              | 79 (24.3)                                 | 164 (50.5)                                | 82 (25.2)                                 | 0.97 (0.76 - 1.24)                                    | 0.8217                                        |
| 3 (0.9)                                | 286 (88.3)                                | 37 (11.4)                                 | 1 (0.3)                                   | 1.11 (0.68 - 1.81)                                    | 0.6688                                        |
| 73 (22.6)                              | 89 (27.6)                                 | 158 (48.9)                                | 76 (23.5)                                 | 1.04 (0.80 - 1.34)                                    | 0.7865                                        |
| 3 (0.9)                                | 255 (78.2)                                | 65 (19.9)                                 | 6 (1.8)                                   | 0.58 (0.37 - 0.89)                                    | 0.0128                                        |
| 55 (16.9)                              | 110 (33.8)                                | 159 (48.9)                                | 56 (17.2)                                 | 0.97 (0.76 - 1.26)                                    | 0.843                                         |
| 20 (6.2)                               | 192 (59.1)                                | 107 (32.9)                                | 26 (8.0)                                  | 1.08 (0.82 - 1.41)                                    | 0.5856                                        |
| 10 (3.1)                               | 204 (63.2)                                | 106 (32.8)                                | 13 (4.0)                                  | 0.87 (0.63 - 1.20)                                    | 0.3972                                        |
| 42 (12.9)                              | 143 (44.0)                                | 144 (44.3)                                | 38 (11.7)                                 | 1.03 (0.80 - 1.34)                                    | 0.803                                         |
| 14 (4.3)                               | 216 (66.7)                                | 90 (27.8)                                 | 18 (5.6)                                  | 1.14 (0.84 - 1.55)                                    | 0.3905                                        |
| 22 (6.8)                               | 170 (52.5)                                | 134 (41.4)                                | 20 (6.2)                                  | 0.88 (0.66 - 1.16)                                    | 0.3536                                        |
| 75 (23.1)                              | 85 (26.2)                                 | 163 (50.2)                                | 77 (23.7)                                 | 0.99 (0.77 - 1.27)                                    | 0.9533                                        |
| 46 (14.1)                              | 144 (44.2)                                | 134 (41.1)                                | 48 (14.7)                                 | 1.29 (1.00 - 1.68)                                    | 0.0514                                        |
| 4 (1.2)                                | 231 (71.1)                                | 86 (26.5)                                 | 8 (2.5)                                   | 1.17 (0.81 - 1.68)                                    | 0.409                                         |
| 31 (9.5)                               | 144 (44.3)                                | 152 (46.8)                                | 29 (8.9)                                  | 0.90 (0.69 - 1.16)                                    | 0.4062                                        |
| 10 (3.1)                               | 220 (67.7)                                | 94 (28.9)                                 | 11 (3.4)                                  | 0.68 (0.48 - 0.97)                                    | 0.0315                                        |
| 18 (5.5)                               | 202 (62.0)                                | 108 (33.1)                                | 16 (4.9)                                  | 1.01 (0.75 - 1.35)                                    | 0.9557                                        |
| 7 (2.2)                                | 283 (88.2)                                | 31 (9.7)                                  | 7 (2.2)                                   | 0.92 (0.57 - 1.46)                                    | 0.7145                                        |
| 3 (0.9)                                | 263 (80.7)                                | 62 (19.0)                                 | 1 (0.3)                                   | 1.20 (0.80 - 1.80)                                    | 0.3711                                        |
| 2 (0.6)                                | 267 (81.9)                                | 54 (16.6)                                 | 5 (1.5)                                   | 0.77 (0.48 - 1.24)                                    | 0.2865                                        |
| 3 (0.9)                                | 285 (88.5)                                | 34 (10.6)                                 | 3 (0.9)                                   | 1.17 (0.73 - 1.88)                                    | 0.5243                                        |
| 0 (0.0)                                | 305 (93.6)                                | 20 (6.1)                                  | 1 (0.3)                                   | 0.88 (0.44 - 1.77)                                    | 0.7213                                        |
| 3 (0.9)                                | 279 (85.6)                                | 45 (13.8)                                 | 2 (0.6)                                   | 0.97 (0.60 - 1.57)                                    | 0.9037                                        |
| 28 (8.7)                               | 167 (51.7)                                | 122 (37.8)                                | 34 (10.5)                                 | 1.02 (0.76 - 1.35)                                    | 0.9155                                        |
| 9 (2.8)                                | 219 (67.8)                                | 93 (28.8)                                 | 11 (3.4)                                  | 0.99 (0.71 - 1.39)                                    | 0.9629                                        |
| 59 (18.3)                              | 113 (35.1)                                | 157 (48.8)                                | 52 (16.1)                                 | 1.03 (0.79 - 1.35)                                    | 0.8297                                        |
| 66 (20.4)                              | 102 (31.5)                                | 163 (50.3)                                | 59 (18.2)                                 | 1.10 (0.85 - 1.41)                                    | 0.4815                                        |
| 22 (6.8)                               | 161 (49.5)                                | 137 (42.2)                                | 27 (8.3)                                  | 0.96 (0.70 - 1.30)                                    | 0.7846                                        |
| 30 (9.2)                               | 150 (46.2)                                | 143 (44.0)                                | 32 (9.8)                                  | 0.95 (0.70 - 1.29)                                    | 0.7568                                        |
| 4 (1.2)                                | 234 (72.2)                                | 81 (25.0)                                 | 9 (2.8)                                   | 0.82 (0.56 - 1.19)                                    | 0.2923                                        |



|           |            |            |           |                    |        |
|-----------|------------|------------|-----------|--------------------|--------|
| 11 (3.4)  | 232 (71.6) | 82 (25.3)  | 10 (3.1)  | 0.97 (0.69 - 1.36) | 0.8664 |
| 24 (7.4)  | 152 (46.9) | 140 (43.2) | 32 (9.9)  | 0.97 (0.72 - 1.31) | 0.8476 |
| 16 (4.9)  | 204 (62.6) | 104 (31.9) | 18 (5.5)  | 1.01 (0.74 - 1.38) | 0.9434 |
| 15 (4.6)  | 178 (54.8) | 128 (39.4) | 19 (5.8)  | 0.89 (0.66 - 1.20) | 0.4545 |
| 32 (9.8)  | 167 (51.4) | 126 (38.8) | 32 (9.8)  | 0.97 (0.72 - 1.29) | 0.8134 |
| 69 (21.2) | 101 (31.1) | 161 (49.5) | 63 (19.4) | 1.06 (0.82 - 1.38) | 0.6466 |
| 20 (6.1)  | 201 (61.7) | 108 (33.1) | 17 (5.2)  | 1.04 (0.76 - 1.42) | 0.7961 |
| 4 (1.2)   | 210 (64.4) | 100 (30.7) | 16 (4.9)  | 0.85 (0.60 - 1.20) | 0.3586 |
| 6 (1.9)   | 214 (66.3) | 95 (29.4)  | 14 (4.3)  | 0.83 (0.59 - 1.16) | 0.2769 |
| 30 (9.3)  | 127 (39.2) | 163 (50.3) | 34 (10.5) | 0.95 (0.70 - 1.31) | 0.7728 |
| 1 (0.3)   | 265 (81.5) | 60 (18.5)  | 0 (0.0)   | 0.82 (0.50 - 1.35) | 0.4336 |
| 30 (9.2)  | 149 (45.7) | 145 (44.5) | 32 (9.8)  | 0.96 (0.71 - 1.30) | 0.8125 |
| 1 (0.3)   | 271 (83.4) | 54 (16.6)  | 0 (0.0)   | 0.90 (0.54 - 1.50) | 0.6825 |
| 6 (1.8)   | 229 (70.5) | 85 (26.2)  | 11 (3.4)  | 0.78 (0.54 - 1.11) | 0.1702 |
| 33 (10.1) | 139 (42.6) | 148 (45.4) | 39 (12.0) | 0.86 (0.65 - 1.14) | 0.2894 |
| 2 (0.6)   | 237 (73.4) | 84 (26.0)  | 2 (0.6)   | 0.85 (0.57 - 1.28) | 0.4377 |
| 9 (2.8)   | 221 (67.8) | 98 (30.1)  | 7 (2.1)   | 0.92 (0.66 - 1.30) | 0.6456 |
| 4 (1.2)   | 261 (80.3) | 61 (18.8)  | 3 (0.9)   | 1.19 (0.78 - 1.81) | 0.4237 |
| 79 (24.3) | 102 (31.4) | 139 (42.8) | 84 (25.8) | 1.10 (0.85 - 1.42) | 0.464  |
| 41 (12.6) | 147 (45.2) | 136 (41.8) | 42 (12.9) | 1.12 (0.86 - 1.47) | 0.3994 |
| 58 (17.8) | 105 (32.3) | 151 (46.5) | 69 (21.2) | 1.04 (0.78 - 1.38) | 0.7889 |
| 15 (4.6)  | 204 (62.6) | 103 (31.6) | 19 (5.8)  | 0.80 (0.58 - 1.11) | 0.1817 |
| 26 (8.0)  | 141 (43.3) | 147 (45.1) | 38 (11.7) | 0.89 (0.66 - 1.19) | 0.4188 |
| 23 (7.1)  | 161 (49.5) | 141 (43.4) | 23 (7.1)  | 1.01 (0.74 - 1.37) | 0.9661 |
| 18 (5.6)  | 192 (59.3) | 119 (36.7) | 13 (4.0)  | 1.05 (0.77 - 1.43) | 0.7677 |
| 4 (1.2)   | 247 (76.2) | 72 (22.2)  | 5 (1.5)   | 1.02 (0.68 - 1.52) | 0.9305 |
| 7 (2.2)   | 230 (70.8) | 87 (26.8)  | 8 (2.5)   | 0.88 (0.59 - 1.31) | 0.5285 |
| 1 (0.3)   | 261 (80.6) | 63 (19.4)  | 0 (0.0)   | 1.11 (0.68 - 1.82) | 0.685  |
| 19 (5.8)  | 180 (55.2) | 125 (38.3) | 21 (6.4)  | 1.02 (0.75 - 1.39) | 0.9138 |
| 38 (11.8) | 156 (48.3) | 128 (39.6) | 39 (12.1) | 1.11 (0.83 - 1.48) | 0.4872 |
| 18 (5.6)  | 175 (54.2) | 128 (39.6) | 20 (6.2)  | 0.91 (0.66 - 1.25) | 0.5613 |
| 15 (4.6)  | 201 (61.7) | 109 (33.4) | 16 (4.9)  | 0.97 (0.71 - 1.34) | 0.8598 |
| 2 (0.6)   | 290 (90.1) | 31 (9.6)   | 1 (0.3)   | 0.97 (0.57 - 1.66) | 0.9248 |
| 40 (12.3) | 148 (45.5) | 147 (45.2) | 30 (9.2)  | 1.06 (0.81 - 1.39) | 0.6468 |
| 2 (0.6)   | 288 (88.6) | 36 (11.1)  | 1 (0.3)   | 0.90 (0.53 - 1.51) | 0.6839 |
| 29 (9.0)  | 166 (51.4) | 132 (40.9) | 25 (7.7)  | 1.00 (0.75 - 1.32) | 0.9791 |
| 0 (0.0)   | 288 (88.3) | 38 (11.7)  | 0 (0.0)   | 1.20 (0.67 - 2.15) | 0.5396 |
| 2 (0.6)   | 296 (90.8) | 29 (8.9)   | 1 (0.3)   | 1.47 (0.86 - 2.51) | 0.1622 |
| 2 (0.6)   | 286 (87.7) | 38 (11.7)  | 2 (0.6)   | 1.23 (0.75 - 2.04) | 0.4114 |
| 4 (1.2)   | 276 (85.2) | 45 (13.9)  | 3 (0.9)   | 1.02 (0.64 - 1.61) | 0.9374 |
| 0 (0.0)   | 279 (86.1) | 44 (13.6)  | 1 (0.3)   | 0.97 (0.59 - 1.61) | 0.9096 |
| 5 (1.5)   | 232 (71.2) | 90 (27.6)  | 4 (1.2)   | 1.19 (0.82 - 1.73) | 0.3562 |
| 9 (2.8)   | 249 (76.6) | 71 (21.8)  | 5 (1.5)   | 1.07 (0.74 - 1.55) | 0.7076 |
| 4 (1.2)   | 249 (76.6) | 72 (22.2)  | 4 (1.2)   | 1.26 (0.83 - 1.92) | 0.2809 |
| 4 (1.2)   | 223 (68.6) | 90 (27.7)  | 12 (3.7)  | 0.82 (0.57 - 1.17) | 0.2713 |
| 9 (2.8)   | 236 (72.6) | 79 (24.3)  | 10 (3.1)  | 0.87 (0.60 - 1.26) | 0.4687 |
| 4 (1.2)   | 279 (85.6) | 41 (12.6)  | 6 (1.8)   | 0.95 (0.60 - 1.51) | 0.8294 |
| 62 (19.1) | 98 (30.2)  | 157 (48.3) | 70 (21.5) | 0.87 (0.68 - 1.12) | 0.2752 |
| 3 (0.9)   | 279 (85.6) | 44 (13.5)  | 3 (0.9)   | 1.68 (1.01 - 2.78) | 0.0445 |
| 64 (19.6) | 100 (30.7) | 159 (48.8) | 67 (20.6) | 1.05 (0.81 - 1.36) | 0.719  |
| 1 (0.3)   | 267 (82.2) | 55 (16.9)  | 3 (0.9)   | 0.90 (0.59 - 1.38) | 0.6253 |
| 9 (2.8)   | 250 (76.9) | 66 (20.3)  | 9 (2.8)   | 1.03 (0.71 - 1.49) | 0.8796 |
| 64 (19.8) | 100 (31.0) | 159 (49.2) | 64 (19.8) | 1.08 (0.83 - 1.39) | 0.5762 |

|           |            |            |           |                    |        |
|-----------|------------|------------|-----------|--------------------|--------|
| 6 (1.8)   | 260 (79.8) | 64 (19.6)  | 2 (0.6)   | 0.96 (0.63 - 1.44) | 0.8276 |
| 51 (15.6) | 108 (33.1) | 166 (50.9) | 52 (16.0) | 0.90 (0.70 - 1.15) | 0.3941 |
| 16 (4.9)  | 176 (54.2) | 123 (37.8) | 26 (8.0)  | 0.82 (0.62 - 1.09) | 0.1672 |
| 40 (12.3) | 128 (39.3) | 146 (44.8) | 52 (16.0) | 0.87 (0.67 - 1.12) | 0.2718 |
| 93 (28.5) | 85 (26.1)  | 155 (47.5) | 86 (26.4) | 1.14 (0.89 - 1.47) | 0.3026 |
| 27 (8.3)  | 157 (48.2) | 135 (41.4) | 34 (10.4) | 0.94 (0.72 - 1.22) | 0.6244 |
| 4 (1.2)   | 277 (85.2) | 42 (12.9)  | 6 (1.8)   | 0.98 (0.62 - 1.55) | 0.9236 |
| 1 (0.3)   | 298 (92.0) | 24 (7.4)   | 2 (0.6)   | 1.44 (0.78 - 2.68) | 0.2449 |
| 1 (0.3)   | 288 (88.9) | 34 (10.5)  | 2 (0.6)   | 1.37 (0.80 - 2.34) | 0.2558 |
| 1 (0.3)   | 298 (91.4) | 26 (8.0)   | 2 (0.6)   | 1.44 (0.81 - 2.55) | 0.2088 |
| 20 (6.1)  | 170 (52.1) | 126 (38.7) | 30 (9.2)  | 0.80 (0.60 - 1.06) | 0.1154 |
| 18 (5.5)  | 188 (57.7) | 125 (38.3) | 13 (4.0)  | 1.03 (0.76 - 1.39) | 0.8509 |
| 1 (0.3)   | 293 (90.2) | 30 (9.2)   | 2 (0.6)   | 1.16 (0.68 - 1.98) | 0.5906 |
| 16 (4.9)  | 183 (56.1) | 119 (36.5) | 24 (7.4)  | 0.87 (0.65 - 1.15) | 0.3326 |
| 1 (0.3)   | 297 (91.4) | 27 (8.3)   | 1 (0.3)   | 0.95 (0.48 - 1.89) | 0.8844 |
| 50 (15.3) | 126 (38.7) | 145 (44.5) | 55 (16.9) | 0.92 (0.72 - 1.17) | 0.5138 |
| 4 (1.2)   | 267 (82.2) | 55 (16.9)  | 3 (0.9)   | 0.89 (0.56 - 1.40) | 0.604  |
| 2 (0.6)   | 271 (83.1) | 52 (16.0)  | 3 (0.9)   | 1.21 (0.78 - 1.88) | 0.4018 |
| 68 (20.9) | 96 (29.5)  | 168 (51.7) | 61 (18.8) | 1.07 (0.81 - 1.41) | 0.6399 |
| 12 (3.7)  | 251 (77.2) | 68 (20.9)  | 6 (1.8)   | 1.80 (1.25 - 2.59) | 0.0016 |
| 17 (5.3)  | 224 (69.3) | 88 (27.2)  | 11 (3.4)  | 1.64 (1.16 - 2.32) | 0.0051 |
| 23 (7.1)  | 198 (60.9) | 111 (34.2) | 16 (4.9)  | 1.24 (0.92 - 1.68) | 0.1632 |
| 24 (7.4)  | 167 (51.2) | 138 (42.3) | 21 (6.4)  | 0.87 (0.65 - 1.17) | 0.3551 |
| 29 (8.9)  | 170 (52.1) | 128 (39.3) | 28 (8.6)  | 0.98 (0.75 - 1.29) | 0.9073 |
| 45 (13.8) | 146 (44.8) | 148 (45.4) | 32 (9.8)  | 1.20 (0.92 - 1.56) | 0.1872 |
| 1 (0.3)   | 302 (92.6) | 24 (7.4)   | 0 (0.0)   | 1.23 (0.60 - 2.49) | 0.5741 |
| 61 (18.7) | 130 (39.9) | 149 (45.7) | 47 (14.4) | 1.37 (1.06 - 1.77) | 0.0177 |
| 30 (9.2)  | 168 (51.5) | 126 (38.7) | 32 (9.8)  | 0.91 (0.69 - 1.19) | 0.4844 |
| 12 (3.7)  | 201 (62.0) | 110 (34.0) | 13 (4.0)  | 1.01 (0.75 - 1.37) | 0.928  |
| 12 (3.7)  | 248 (76.5) | 71 (21.9)  | 5 (1.5)   | 1.81 (1.25 - 2.62) | 0.0016 |
| 17 (5.2)  | 211 (64.9) | 99 (30.5)  | 15 (4.6)  | 1.36 (0.99 - 1.86) | 0.0565 |
| 17 (5.2)  | 233 (71.9) | 80 (24.7)  | 11 (3.4)  | 1.75 (1.24 - 2.46) | 0.0013 |
| 9 (2.8)   | 259 (80.2) | 59 (18.3)  | 5 (1.5)   | 1.97 (1.31 - 2.96) | 0.001  |
| 14 (4.3)  | 257 (79.1) | 62 (19.1)  | 6 (1.8)   | 1.98 (1.34 - 2.92) | 0.0006 |
| 0 (0.0)   | 301 (92.3) | 25 (7.7)   | 0 (0.0)   | 1.14 (0.57 - 2.29) | 0.7077 |
| 3 (0.9)   | 264 (81.2) | 57 (17.5)  | 4 (1.2)   | 0.52 (0.32 - 0.84) | 0.008  |

| PD susceptibility:<br>Women Dominant<br>Model<br>OR (95%CI) | PD susceptibility:<br>Women<br>Dominant P-value | PD susceptibility:<br>Women Recessive<br>Model<br>OR (95%CI) | PD susceptibility:<br>Women<br>Recessive P-value | CC<br>Genotype n(%)<br>1/1<br>Cases | CC<br>Genotype n(%)<br>1/2<br>Cases |
|-------------------------------------------------------------|-------------------------------------------------|--------------------------------------------------------------|--------------------------------------------------|-------------------------------------|-------------------------------------|
| 0.92 (0.64 - 1.31)                                          | 0.6296                                          | 0.98 (0.61 - 1.57)                                           | 0.9316                                           | 176 (41.8)                          | 187 (44.4)                          |
| 1.00 (0.71 - 1.41)                                          | 0.9926                                          | 1.00 (0.62 - 1.60)                                           | 0.9856                                           | 148 (33.7)                          | 217 (49.4)                          |
| 0.80 (0.50 - 1.27)                                          | 0.3449                                          | 0.65 (0.11 - 3.90)                                           | 0.6354                                           | 368 (83.1)                          | 71 (16.0)                           |
| 1.00 (0.51 - 1.96)                                          | 0.9947                                          | 0.00 (0.00 - )                                               | 0.9857                                           | 405 (92.5)                          | 33 (7.5)                            |
| 1.04 (0.72 - 1.51)                                          | 0.8267                                          | 0.86 (0.56 - 1.33)                                           | 0.4999                                           | 118 (26.9)                          | 224 (51.0)                          |
| 0.96 (0.65 - 1.42)                                          | 0.8447                                          | 0.83 (0.54 - 1.27)                                           | 0.3841                                           | 149 (33.7)                          | 215 (48.6)                          |
| 1.09 (0.73 - 1.63)                                          | 0.6822                                          | 0.77 (0.51 - 1.15)                                           | 0.1991                                           | 126 (28.4)                          | 227 (51.2)                          |
| 0.99 (0.67 - 1.47)                                          | 0.9687                                          | 0.57 (0.17 - 1.94)                                           | 0.3672                                           | 329 (74.9)                          | 101 (23.0)                          |
| 1.02 (0.71 - 1.45)                                          | 0.9197                                          | 1.05 (0.64 - 1.71)                                           | 0.8543                                           | 155 (35.1)                          | 216 (49.0)                          |
| 1.09 (0.73 - 1.63)                                          | 0.6838                                          | 0.80 (0.54 - 1.20)                                           | 0.2809                                           | 126 (28.6)                          | 225 (51.0)                          |
| 0.82 (0.46 - 1.45)                                          | 0.4951                                          | 1.97 (0.18 - )                                               | 0.5795                                           | 395 (89.6)                          | 44 (10.0)                           |
| 1.33 (0.84 - 2.10)                                          | 0.2206                                          | 0.42 (0.13 - 1.38)                                           | 0.1555                                           | 329 (74.6)                          | 108 (24.5)                          |
| 1.47 (0.90 - 2.38)                                          | 0.1223                                          | 0.90 (0.06 - )                                               | 0.941                                            | 357 (81.5)                          | 80 (18.3)                           |
| 1.26 (0.91 - 1.76)                                          | 0.1658                                          | 1.10 (0.50 - 2.42)                                           | 0.8112                                           | 250 (56.9)                          | 169 (38.5)                          |
| 0.86 (0.52 - 1.45)                                          | 0.5785                                          | 3790864 (0.00 - )                                            | 0.9865                                           | 381 (86.2)                          | 57 (12.9)                           |
| 0.96 (0.64 - 1.44)                                          | 0.833                                           | 3.84 (0.81 - )                                               | 0.0893                                           | 347 (78.5)                          | 87 (19.7)                           |
| 1.14 (0.77 - 1.69)                                          | 0.5163                                          | 1.19 (0.49 - 2.89)                                           | 0.6951                                           | 306 (69.4)                          | 124 (28.1)                          |
| 1.03 (0.73 - 1.45)                                          | 0.8639                                          | 1.19 (0.62 - 2.28)                                           | 0.5976                                           | 235 (53.4)                          | 170 (38.6)                          |
| 0.97 (0.68 - 1.39)                                          | 0.8867                                          | 2.23 (0.92 - 5.42)                                           | 0.0774                                           | 299 (67.5)                          | 125 (28.2)                          |
| 0.86 (0.58 - 1.28)                                          | 0.4614                                          | 1.07 (0.73 - 1.58)                                           | 0.7185                                           | 125 (28.2)                          | 203 (45.8)                          |
| 1.05 (0.61 - 1.81)                                          | 0.8523                                          | 3.15 (0.33 - )                                               | 0.3209                                           | 385 (87.1)                          | 55 (12.4)                           |
| 1.16 (0.79 - 1.70)                                          | 0.4581                                          | 0.92 (0.59 - 1.42)                                           | 0.7012                                           | 111 (25.3)                          | 228 (51.9)                          |
| 0.56 (0.35 - 0.90)                                          | 0.0157                                          | 0.39 (0.07 - 2.00)                                           | 0.2574                                           | 359 (81.2)                          | 77 (17.4)                           |
| 0.97 (0.68 - 1.39)                                          | 0.8845                                          | 0.96 (0.61 - 1.52)                                           | 0.8623                                           | 144 (32.6)                          | 220 (49.8)                          |
| 1.23 (0.87 - 1.73)                                          | 0.2358                                          | 0.73 (0.39 - 1.40)                                           | 0.3497                                           | 252 (57.0)                          | 160 (36.2)                          |
| 0.88 (0.62 - 1.26)                                          | 0.4992                                          | 0.67 (0.24 - 1.89)                                           | 0.449                                            | 293 (66.3)                          | 135 (30.5)                          |
| 1.00 (0.70 - 1.42)                                          | 0.9898                                          | 1.15 (0.68 - 1.95)                                           | 0.5988                                           | 212 (48.1)                          | 177 (40.1)                          |
| 1.27 (0.89 - 1.80)                                          | 0.1833                                          | 0.67 (0.27 - 1.65)                                           | 0.3855                                           | 274 (62.6)                          | 145 (33.1)                          |
| 0.80 (0.57 - 1.12)                                          | 0.1964                                          | 1.13 (0.56 - 2.26)                                           | 0.737                                            | 246 (55.7)                          | 162 (36.7)                          |
| 1.04 (0.72 - 1.52)                                          | 0.8272                                          | 0.93 (0.61 - 1.41)                                           | 0.7351                                           | 111 (25.2)                          | 221 (50.1)                          |
| 1.60 (1.14 - 2.26)                                          | 0.0067                                          | 0.92 (0.53 - 1.59)                                           | 0.7656                                           | 153 (34.6)                          | 237 (53.6)                          |
| 1.30 (0.88 - 1.93)                                          | 0.1885                                          | 0.40 (0.10 - 1.56)                                           | 0.1883                                           | 304 (68.8)                          | 128 (29.0)                          |
| 0.81 (0.57 - 1.13)                                          | 0.2091                                          | 1.09 (0.61 - 1.95)                                           | 0.7642                                           | 196 (44.5)                          | 199 (45.2)                          |
| 0.62 (0.42 - 0.93)                                          | 0.0192                                          | 0.84 (0.28 - 2.51)                                           | 0.7568                                           | 317 (71.7)                          | 112 (25.3)                          |
| 0.98 (0.69 - 1.40)                                          | 0.9172                                          | 1.16 (0.53 - 2.50)                                           | 0.712                                            | 279 (63.3)                          | 142 (32.2)                          |
| 0.88 (0.49 - 1.58)                                          | 0.6804                                          | 0.94 (0.27 - 3.28)                                           | 0.9233                                           | 390 (89.4)                          | 42 (9.6)                            |
| 1.17 (0.77 - 1.80)                                          | 0.462                                           | 2.91 (0.30 - )                                               | 0.3543                                           | 358 (80.8)                          | 78 (17.6)                           |
| 0.81 (0.48 - 1.37)                                          | 0.4275                                          | 0.39 (0.07 - 2.03)                                           | 0.2625                                           | 355 (80.3)                          | 81 (18.3)                           |
| 1.20 (0.71 - 2.03)                                          | 0.4898                                          | 1.03 (0.21 - 5.09)                                           | 0.9745                                           | 381 (86.8)                          | 54 (12.3)                           |
| 0.93 (0.45 - 1.95)                                          | 0.8568                                          | 0.00 (0.00 - )                                               | 0.9856                                           | 425 (96.2)                          | 17 (3.8)                            |
| 0.94 (0.56 - 1.55)                                          | 0.7971                                          | 2.00 (0.18 - )                                               | 0.5724                                           | 374 (84.6)                          | 66 (14.9)                           |
| 1.15 (0.79 - 1.67)                                          | 0.4739                                          | 0.78 (0.45 - 1.37)                                           | 0.3916                                           | 211 (48.0)                          | 186 (42.3)                          |
| 1.04 (0.71 - 1.52)                                          | 0.8396                                          | 0.68 (0.23 - 1.98)                                           | 0.4817                                           | 294 (66.8)                          | 130 (29.5)                          |
| 0.94 (0.64 - 1.38)                                          | 0.744                                           | 1.21 (0.75 - 1.94)                                           | 0.4346                                           | 168 (38.2)                          | 201 (45.7)                          |
| 1.12 (0.75 - 1.68)                                          | 0.584                                           | 1.14 (0.74 - 1.76)                                           | 0.5439                                           | 138 (31.3)                          | 209 (47.4)                          |
| 1.03 (0.70 - 1.52)                                          | 0.8653                                          | 0.77 (0.42 - 1.44)                                           | 0.4166                                           | 237 (53.5)                          | 169 (38.1)                          |
| 0.96 (0.66 - 1.41)                                          | 0.8486                                          | 0.89 (0.45 - 1.74)                                           | 0.7306                                           | 197 (44.8)                          | 206 (46.8)                          |
| 0.88 (0.58 - 1.32)                                          | 0.5284                                          | 0.37 (0.10 - 1.39)                                           | 0.1409                                           | 313 (71.6)                          | 118 (27.0)                          |

|                    |        |                    |        |            |            |
|--------------------|--------|--------------------|--------|------------|------------|
| 0.94 (0.64 - 1.40) | 0.7746 | 1.13 (0.41 - 3.12) | 0.8136 | 319 (72.3) | 109 (24.7) |
| 1.09 (0.76 - 1.56) | 0.6404 | 0.63 (0.31 - 1.26) | 0.1902 | 216 (49.0) | 193 (43.8) |
| 1.06 (0.73 - 1.54) | 0.7561 | 0.83 (0.38 - 1.80) | 0.6406 | 271 (61.3) | 147 (33.3) |
| 0.91 (0.64 - 1.29) | 0.5888 | 0.74 (0.34 - 1.61) | 0.4446 | 278 (62.9) | 147 (33.3) |
| 0.94 (0.66 - 1.36) | 0.7541 | 1.01 (0.53 - 1.91) | 0.9788 | 223 (50.6) | 171 (38.8) |
| 1.02 (0.69 - 1.51) | 0.9243 | 1.15 (0.75 - 1.77) | 0.5202 | 129 (29.5) | 225 (51.4) |
| 1.00 (0.69 - 1.44) | 0.9849 | 1.30 (0.60 - 2.78) | 0.5057 | 273 (61.9) | 142 (32.2) |
| 1.03 (0.70 - 1.51) | 0.8815 | 0.14 (0.03 - 0.62) | 0.0097 | 282 (63.7) | 151 (34.1) |
| 0.91 (0.62 - 1.34) | 0.6307 | 0.34 (0.11 - 1.06) | 0.0619 | 290 (65.8) | 140 (31.7) |
| 1.01 (0.69 - 1.48) | 0.9699 | 0.80 (0.41 - 1.54) | 0.5044 | 178 (40.5) | 215 (49.0) |
| 0.79 (0.48 - 1.31) | 0.3597 | 539867.2 (0.00 - ) | 0.9857 | 361 (81.7) | 80 (18.1)  |
| 0.98 (0.67 - 1.41) | 0.8951 | 0.90 (0.46 - 1.77) | 0.7688 | 198 (44.7) | 207 (46.7) |
| 0.87 (0.52 - 1.45) | 0.5872 | 539811.8 (0.00 - ) | 0.9857 | 367 (83.4) | 72 (16.4)  |
| 0.80 (0.53 - 1.20) | 0.2842 | 0.45 (0.14 - 1.47) | 0.1886 | 311 (70.5) | 118 (26.8) |
| 0.86 (0.60 - 1.23) | 0.4098 | 0.76 (0.42 - 1.38) | 0.3685 | 217 (49.3) | 179 (40.7) |
| 0.84 (0.55 - 1.28) | 0.4182 | 0.99 (0.14 - 7.03) | 0.9916 | 334 (76.4) | 96 (22.0)  |
| 0.87 (0.59 - 1.27) | 0.4694 | 1.36 (0.47 - 3.91) | 0.5724 | 305 (68.8) | 126 (28.4) |
| 1.19 (0.76 - 1.86) | 0.4481 | 1.37 (0.23 - 8.26) | 0.7303 | 343 (78.0) | 91 (20.7)  |
| 1.40 (0.93 - 2.10) | 0.1077 | 0.90 (0.60 - 1.37) | 0.6331 | 102 (23.1) | 222 (50.2) |
| 1.23 (0.86 - 1.76) | 0.2484 | 0.98 (0.56 - 1.72) | 0.9382 | 185 (41.8) | 194 (43.8) |
| 1.43 (0.93 - 2.20) | 0.1046 | 0.74 (0.46 - 1.16) | 0.19   | 132 (29.8) | 216 (48.8) |
| 0.79 (0.54 - 1.15) | 0.221  | 0.71 (0.30 - 1.66) | 0.4232 | 279 (63.0) | 145 (32.7) |
| 1.02 (0.71 - 1.46) | 0.9313 | 0.53 (0.27 - 1.03) | 0.0619 | 202 (45.7) | 200 (45.2) |
| 1.01 (0.70 - 1.47) | 0.9479 | 0.99 (0.47 - 2.08) | 0.9773 | 234 (53.3) | 172 (39.2) |
| 0.97 (0.68 - 1.40) | 0.8791 | 1.55 (0.69 - 3.47) | 0.2854 | 254 (57.9) | 166 (37.8) |
| 1.04 (0.67 - 1.61) | 0.8642 | 0.86 (0.23 - 3.22) | 0.8211 | 334 (75.9) | 99 (22.5)  |
| 0.88 (0.56 - 1.37) | 0.5653 | 0.82 (0.27 - 2.46) | 0.7274 | 310 (70.3) | 122 (27.7) |
| 1.08 (0.65 - 1.77) | 0.7708 | 468934.8 (0.00 - ) | 0.9858 | 381 (86.4) | 58 (13.2)  |
| 1.06 (0.74 - 1.53) | 0.7497 | 0.83 (0.36 - 1.92) | 0.6587 | 252 (56.9) | 167 (37.7) |
| 1.25 (0.84 - 1.85) | 0.2724 | 0.94 (0.55 - 1.61) | 0.8234 | 211 (48.0) | 174 (39.5) |
| 0.90 (0.61 - 1.33) | 0.6015 | 0.88 (0.44 - 1.77) | 0.7259 | 256 (58.6) | 157 (35.9) |
| 0.98 (0.67 - 1.43) | 0.9112 | 0.91 (0.40 - 2.07) | 0.8308 | 291 (65.8) | 137 (31.0) |
| 0.92 (0.51 - 1.66) | 0.7935 | 2.08 (0.19 - )     | 0.5503 | 401 (91.1) | 36 (8.2)   |
| 0.95 (0.66 - 1.36) | 0.7725 | 1.47 (0.84 - 2.56) | 0.1731 | 208 (47.1) | 176 (39.8) |
| 0.85 (0.49 - 1.49) | 0.5751 | 1.86 (0.17 - )     | 0.6131 | 400 (90.7) | 39 (8.8)   |
| 0.93 (0.65 - 1.32) | 0.6864 | 1.22 (0.66 - 2.25) | 0.5223 | 230 (52.3) | 173 (39.3) |
| 1.20 (0.67 - 2.15) | 0.5396 | ( - )              | --     | 384 (86.7) | 59 (13.3)  |
| 1.51 (0.85 - 2.70) | 0.1616 | 1.85 (0.17 - )     | 0.6167 | 388 (88.2) | 50 (11.4)  |
| 1.29 (0.75 - 2.23) | 0.3564 | 0.90 (0.12 - 6.53) | 0.9171 | 386 (87.1) | 54 (12.2)  |
| 0.99 (0.60 - 1.65) | 0.9698 | 1.48 (0.25 - 8.84) | 0.6693 | 384 (86.9) | 55 (12.4)  |
| 1.00 (0.60 - 1.67) | 0.9993 | 0.00 (0.00 - )     | 0.9859 | 393 (89.3) | 45 (10.2)  |
| 1.19 (0.80 - 1.77) | 0.3816 | 1.54 (0.26 - 9.21) | 0.6373 | 322 (72.7) | 115 (26.0) |
| 1.01 (0.67 - 1.51) | 0.9745 | 2.20 (0.57 - 8.56) | 0.2535 | 342 (77.6) | 94 (21.3)  |
| 1.30 (0.83 - 2.03) | 0.2528 | 1.01 (0.14 - 7.17) | 0.9922 | 336 (76.2) | 102 (23.1) |
| 0.92 (0.62 - 1.36) | 0.6802 | 0.27 (0.07 - 0.97) | 0.0441 | 292 (66.2) | 141 (32.0) |
| 0.86 (0.57 - 1.29) | 0.4614 | 0.88 (0.27 - 2.89) | 0.8297 | 330 (74.5) | 106 (23.9) |
| 1.00 (0.60 - 1.68) | 0.9882 | 0.61 (0.14 - 2.55) | 0.4963 | 356 (80.5) | 82 (18.6)  |
| 0.84 (0.58 - 1.21) | 0.3424 | 0.84 (0.55 - 1.29) | 0.4382 | 132 (29.9) | 219 (49.5) |
| 1.74 (1.03 - 2.94) | 0.0384 | 1.00 (0.14 - 7.11) | 1      | 353 (79.9) | 87 (19.7)  |
| 1.17 (0.79 - 1.73) | 0.4353 | 0.95 (0.62 - 1.44) | 0.8002 | 140 (31.7) | 229 (51.8) |
| 0.94 (0.60 - 1.47) | 0.774  | 0.33 (0.03 - 3.17) | 0.3362 | 378 (85.5) | 64 (14.5)  |
| 1.04 (0.68 - 1.59) | 0.8628 | 1.00 (0.38 - 2.68) | 0.9935 | 310 (70.9) | 121 (27.7) |
| 1.17 (0.79 - 1.73) | 0.4353 | 1.01 (0.67 - 1.54) | 0.9458 | 141 (32.3) | 223 (51.0) |

|                    |        |                    |        |            |            |
|--------------------|--------|--------------------|--------|------------|------------|
| 0.84 (0.53 - 1.34) | 0.4693 | 3.07 (0.62 -       | 0.1701 | 370 (83.7) | 67 (15.2)  |
| 0.81 (0.56 - 1.17) | 0.2543 | 0.97 (0.62 - 1.53) | 0.9082 | 133 (30.1) | 215 (48.6) |
| 0.85 (0.60 - 1.22) | 0.3833 | 0.56 (0.29 - 1.12) | 0.1002 | 238 (53.8) | 175 (39.6) |
| 0.92 (0.65 - 1.30) | 0.6457 | 0.66 (0.39 - 1.12) | 0.1279 | 176 (40.0) | 207 (47.0) |
| 1.20 (0.80 - 1.81) | 0.3863 | 1.16 (0.79 - 1.71) | 0.4395 | 115 (26.1) | 223 (50.6) |
| 0.99 (0.71 - 1.40) | 0.9676 | 0.72 (0.39 - 1.33) | 0.296  | 197 (44.6) | 194 (43.9) |
| 1.04 (0.62 - 1.73) | 0.8839 | 0.61 (0.14 - 2.55) | 0.4963 | 355 (80.3) | 83 (18.8)  |
| 1.53 (0.82 - 2.88) | 0.1834 | 0.00 (0.00 - )     | 0.9857 | 380 (86.6) | 59 (13.4)  |
| 1.43 (0.83 - 2.46) | 0.1999 | 0.00 (0.00 - )     | 0.9857 | 359 (81.8) | 78 (17.8)  |
| 1.52 (0.85 - 2.71) | 0.158  | 0.00 (0.00 - )     | 0.9857 | 377 (85.5) | 64 (14.5)  |
| 0.82 (0.58 - 1.16) | 0.2656 | 0.57 (0.29 - 1.12) | 0.1009 | 229 (51.8) | 178 (40.3) |
| 0.95 (0.67 - 1.36) | 0.7916 | 1.50 (0.69 - 3.24) | 0.3026 | 255 (57.8) | 161 (36.5) |
| 1.25 (0.69 - 2.25) | 0.4582 | 0.49 (0.04 - 5.42) | 0.5622 | 385 (86.9) | 57 (12.9)  |
| 0.91 (0.64 - 1.29) | 0.5898 | 0.64 (0.32 - 1.27) | 0.2018 | 257 (58.0) | 165 (37.2) |
| 0.96 (0.47 - 1.95) | 0.9103 | 0.81 (0.05 -       | 0.8826 | 408 (92.3) | 33 (7.5)   |
| 0.90 (0.64 - 1.28) | 0.5712 | 0.90 (0.58 - 1.40) | 0.6272 | 173 (39.1) | 208 (47.1) |
| 0.85 (0.52 - 1.38) | 0.503  | 2.01 (0.18 -       | 0.5686 | 371 (83.7) | 67 (15.1)  |
| 1.27 (0.80 - 2.04) | 0.3127 | 0.66 (0.11 - 3.97) | 0.6534 | 361 (81.7) | 79 (17.9)  |
| 1.00 (0.67 - 1.50) | 0.9888 | 1.20 (0.75 - 1.92) | 0.4407 | 136 (30.8) | 212 (48.0) |
| 1.92 (1.27 - 2.89) | 0.0019 | 2.45 (0.77 - 7.81) | 0.1309 | 299 (67.8) | 128 (29.0) |
| 1.75 (1.17 - 2.63) | 0.0065 | 1.77 (0.74 - 4.22) | 0.1996 | 246 (56.3) | 170 (38.9) |
| 1.22 (0.85 - 1.77) | 0.2828 | 1.63 (0.77 - 3.45) | 0.2032 | 255 (57.7) | 159 (36.0) |
| 0.77 (0.54 - 1.11) | 0.1642 | 1.23 (0.59 - 2.56) | 0.5811 | 229 (51.7) | 184 (41.5) |
| 0.97 (0.69 - 1.35) | 0.8423 | 1.03 (0.55 - 1.94) | 0.9196 | 232 (52.5) | 176 (39.8) |
| 1.11 (0.80 - 1.54) | 0.5409 | 1.78 (0.96 - 3.28) | 0.0657 | 183 (41.4) | 203 (45.9) |
| 1.15 (0.56 - 2.35) | 0.7095 | 656284.8 (0.00 - ) | 0.9855 | 406 (91.6) | 35 (7.9)   |
| 1.54 (1.05 - 2.25) | 0.0272 | 1.45 (0.92 - 2.29) | 0.1127 | 143 (32.3) | 238 (53.7) |
| 0.86 (0.60 - 1.24) | 0.4328 | 0.93 (0.54 - 1.63) | 0.8128 | 238 (54.0) | 165 (37.4) |
| 1.03 (0.73 - 1.46) | 0.8601 | 0.93 (0.41 - 2.12) | 0.8684 | 283 (64.0) | 144 (32.6) |
| 1.86 (1.23 - 2.79) | 0.003  | 3.15 (0.86 -       | 0.0824 | 297 (67.5) | 128 (29.1) |
| 1.48 (1.02 - 2.13) | 0.0388 | 1.17 (0.52 - 2.62) | 0.705  | 258 (58.4) | 166 (37.6) |
| 1.99 (1.33 - 2.98) | 0.0008 | 1.80 (0.72 - 4.52) | 0.2122 | 274 (62.3) | 143 (32.5) |
| 2.21 (1.40 - 3.49) | 0.0007 | 1.95 (0.59 - 6.47) | 0.2775 | 311 (70.4) | 118 (26.7) |
| 2.11 (1.35 - 3.28) | 0.001  | 2.98 (0.96 - 9.24) | 0.0591 | 301 (68.3) | 123 (27.9) |
| 1.14 (0.57 - 2.29) | 0.7077 | ( - )              | --     | 407 (92.1) | 35 (7.9)   |
| 0.48 (0.28 - 0.81) | 0.0058 | 0.67 (0.11 - 4.04) | 0.6659 | 384 (86.7) | 56 (12.6)  |

| CC<br>Genotype n(%)<br>2/2<br>Cases | CC<br>Genotype n(%)<br>1/1<br>Controls | CC<br>Genotype n(%)<br>1/2<br>Controls | CC<br>Genotype n(%)<br>2/2<br>Controls | PD susceptibility:<br>CC<br>Trend<br>Model<br>OR (95%CI) | PD susceptibility:<br>CC<br>Trend P-value |
|-------------------------------------|----------------------------------------|----------------------------------------|----------------------------------------|----------------------------------------------------------|-------------------------------------------|
| 58 (13.8)                           | 169 (40.1)                             | 194 (46.1)                             | 58 (13.8)                              | 0.98 (0.80 - 1.20)                                       | 0.8582                                    |
| 74 (16.9)                           | 155 (35.3)                             | 202 (46.0)                             | 82 (18.7)                              | 0.95 (0.78 - 1.14)                                       | 0.5571                                    |
| 4 (0.9)                             | 362 (81.7)                             | 76 (17.2)                              | 5 (1.1)                                | 0.93 (0.68 - 1.29)                                       | 0.6761                                    |
| 0 (0.0)                             | 408 (93.2)                             | 28 (6.4)                               | 2 (0.5)                                | 1.24 (0.74 - 2.08)                                       | 0.4078                                    |
| 97 (22.1)                           | 128 (29.2)                             | 213 (48.5)                             | 98 (22.3)                              | 1.02 (0.84 - 1.25)                                       | 0.8102                                    |
| 78 (17.6)                           | 147 (33.3)                             | 203 (45.9)                             | 92 (20.8)                              | 0.96 (0.80 - 1.15)                                       | 0.668                                     |
| 90 (20.3)                           | 128 (28.9)                             | 210 (47.4)                             | 105 (23.7)                             | 0.96 (0.80 - 1.16)                                       | 0.6661                                    |
| 9 (2.1)                             | 339 (77.2)                             | 92 (21.0)                              | 8 (1.8)                                | 1.18 (0.90 - 1.55)                                       | 0.2402                                    |
| 70 (15.9)                           | 164 (37.2)                             | 209 (47.4)                             | 68 (15.4)                              | 1.02 (0.83 - 1.24)                                       | 0.8816                                    |
| 90 (20.4)                           | 128 (29.0)                             | 209 (47.4)                             | 104 (23.6)                             | 0.96 (0.80 - 1.16)                                       | 0.6991                                    |
| 2 (0.5)                             | 397 (90.0)                             | 42 (9.5)                               | 2 (0.5)                                | 1.01 (0.67 - 1.54)                                       | 0.9541                                    |
| 4 (0.9)                             | 343 (77.8)                             | 87 (19.7)                              | 11 (2.5)                               | 1.18 (0.88 - 1.58)                                       | 0.2687                                    |
| 1 (0.2)                             | 367 (83.8)                             | 68 (15.5)                              | 3 (0.7)                                | 1.05 (0.74 - 1.49)                                       | 0.7886                                    |
| 20 (4.6)                            | 272 (62.0)                             | 140 (31.9)                             | 27 (6.2)                               | 1.04 (0.84 - 1.30)                                       | 0.7147                                    |
| 4 (0.9)                             | 386 (87.3)                             | 54 (12.2)                              | 2 (0.5)                                | 1.10 (0.76 - 1.60)                                       | 0.6137                                    |
| 8 (1.8)                             | 350 (79.2)                             | 86 (19.5)                              | 6 (1.4)                                | 1.02 (0.77 - 1.37)                                       | 0.869                                     |
| 11 (2.5)                            | 305 (69.2)                             | 122 (27.7)                             | 14 (3.2)                               | 0.98 (0.76 - 1.27)                                       | 0.8883                                    |
| 35 (8.0)                            | 220 (50.0)                             | 190 (43.2)                             | 30 (6.8)                               | 0.97 (0.78 - 1.21)                                       | 0.7934                                    |
| 19 (4.3)                            | 300 (67.7)                             | 127 (28.7)                             | 16 (3.6)                               | 1.01 (0.80 - 1.28)                                       | 0.9538                                    |
| 115 (26.0)                          | 102 (23.0)                             | 242 (54.6)                             | 99 (22.3)                              | 0.98 (0.81 - 1.19)                                       | 0.8548                                    |
| 2 (0.5)                             | 382 (86.4)                             | 58 (13.1)                              | 2 (0.5)                                | 0.93 (0.63 - 1.37)                                       | 0.7041                                    |
| 100 (22.8)                          | 126 (28.7)                             | 199 (45.3)                             | 114 (26.0)                             | 0.99 (0.82 - 1.20)                                       | 0.9435                                    |
| 6 (1.4)                             | 347 (78.5)                             | 88 (19.9)                              | 7 (1.6)                                | 0.87 (0.65 - 1.18)                                       | 0.3827                                    |
| 78 (17.6)                           | 151 (34.2)                             | 206 (46.6)                             | 85 (19.2)                              | 0.99 (0.81 - 1.19)                                       | 0.8782                                    |
| 30 (6.8)                            | 262 (59.3)                             | 147 (33.3)                             | 33 (7.5)                               | 1.10 (0.89 - 1.35)                                       | 0.3975                                    |
| 14 (3.2)                            | 309 (69.9)                             | 122 (27.6)                             | 11 (2.5)                               | 1.21 (0.94 - 1.56)                                       | 0.1304                                    |
| 52 (11.8)                           | 196 (44.4)                             | 190 (43.1)                             | 55 (12.5)                              | 0.94 (0.78 - 1.15)                                       | 0.5639                                    |
| 19 (4.3)                            | 283 (64.6)                             | 138 (31.5)                             | 17 (3.9)                               | 1.01 (0.80 - 1.28)                                       | 0.924                                     |
| 34 (7.7)                            | 241 (54.5)                             | 168 (38.0)                             | 33 (7.5)                               | 1.00 (0.81 - 1.24)                                       | 0.9663                                    |
| 109 (24.7)                          | 122 (27.7)                             | 215 (48.8)                             | 104 (23.6)                             | 1.05 (0.87 - 1.28)                                       | 0.5941                                    |
| 52 (11.8)                           | 192 (43.4)                             | 179 (40.5)                             | 71 (16.1)                              | 1.08 (0.89 - 1.32)                                       | 0.4385                                    |
| 10 (2.3)                            | 300 (67.9)                             | 130 (29.4)                             | 12 (2.7)                               | 0.96 (0.74 - 1.24)                                       | 0.7452                                    |
| 45 (10.2)                           | 196 (44.5)                             | 188 (42.7)                             | 56 (12.7)                              | 0.91 (0.75 - 1.11)                                       | 0.3471                                    |
| 13 (2.9)                            | 309 (69.9)                             | 119 (26.9)                             | 14 (3.2)                               | 0.93 (0.72 - 1.20)                                       | 0.57                                      |
| 20 (4.5)                            | 272 (61.7)                             | 148 (33.6)                             | 21 (4.8)                               | 1.00 (0.79 - 1.27)                                       | 0.9748                                    |
| 4 (0.9)                             | 393 (90.1)                             | 38 (8.7)                               | 5 (1.1)                                | 0.99 (0.67 - 1.47)                                       | 0.9688                                    |
| 7 (1.6)                             | 372 (84.0)                             | 67 (15.1)                              | 4 (0.9)                                | 1.33 (0.97 - 1.84)                                       | 0.0787                                    |
| 6 (1.4)                             | 377 (85.3)                             | 63 (14.3)                              | 2 (0.5)                                | 1.39 (0.97 - 1.99)                                       | 0.0697                                    |
| 4 (0.9)                             | 370 (84.3)                             | 63 (14.4)                              | 6 (1.4)                                | 0.84 (0.58 - 1.21)                                       | 0.3542                                    |
| 0 (0.0)                             | 407 (92.1)                             | 34 (7.7)                               | 1 (0.2)                                | 0.43 (0.23 - 0.80)                                       | 0.0082                                    |
| 2 (0.5)                             | 382 (86.4)                             | 58 (13.1)                              | 2 (0.5)                                | 1.14 (0.78 - 1.66)                                       | 0.4914                                    |
| 43 (9.8)                            | 202 (45.9)                             | 183 (41.6)                             | 55 (12.5)                              | 0.87 (0.71 - 1.07)                                       | 0.1899                                    |
| 16 (3.6)                            | 298 (67.7)                             | 129 (29.3)                             | 13 (3.0)                               | 1.10 (0.86 - 1.42)                                       | 0.4349                                    |
| 71 (16.1)                           | 141 (32.0)                             | 217 (49.3)                             | 82 (18.6)                              | 0.80 (0.65 - 0.97)                                       | 0.0274                                    |
| 94 (21.3)                           | 139 (31.5)                             | 210 (47.6)                             | 92 (20.9)                              | 0.97 (0.80 - 1.18)                                       | 0.7727                                    |
| 37 (8.4)                            | 234 (52.8)                             | 181 (40.9)                             | 28 (6.3)                               | 1.07 (0.86 - 1.34)                                       | 0.5418                                    |
| 37 (8.4)                            | 208 (47.3)                             | 191 (43.4)                             | 41 (9.3)                               | 1.00 (0.81 - 1.25)                                       | 0.9699                                    |
| 6 (1.4)                             | 325 (74.4)                             | 103 (23.6)                             | 9 (2.1)                                | 1.00 (0.76 - 1.33)                                       | 0.9841                                    |

|            |            |            |            |                    |        |
|------------|------------|------------|------------|--------------------|--------|
| 13 (2.9)   | 325 (73.7) | 101 (22.9) | 15 (3.4)   | 1.05 (0.81 - 1.37) | 0.6996 |
| 32 (7.3)   | 219 (49.7) | 180 (40.8) | 42 (9.5)   | 0.95 (0.77 - 1.18) | 0.6605 |
| 24 (5.4)   | 279 (63.1) | 140 (31.7) | 23 (5.2)   | 1.02 (0.80 - 1.28) | 0.8972 |
| 17 (3.8)   | 246 (55.7) | 173 (39.1) | 23 (5.2)   | 0.84 (0.66 - 1.07) | 0.1496 |
| 47 (10.7)  | 210 (47.6) | 178 (40.4) | 53 (12.0)  | 0.88 (0.71 - 1.08) | 0.2311 |
| 84 (19.2)  | 135 (30.8) | 216 (49.3) | 87 (19.9)  | 1.02 (0.83 - 1.25) | 0.8359 |
| 26 (5.9)   | 246 (55.8) | 175 (39.7) | 20 (4.5)   | 0.87 (0.68 - 1.11) | 0.2546 |
| 10 (2.3)   | 286 (64.6) | 135 (30.5) | 22 (5.0)   | 0.90 (0.69 - 1.16) | 0.3977 |
| 11 (2.5)   | 291 (66.0) | 131 (29.7) | 19 (4.3)   | 0.90 (0.70 - 1.16) | 0.4238 |
| 46 (10.5)  | 188 (42.8) | 208 (47.4) | 43 (9.8)   | 1.07 (0.86 - 1.33) | 0.5499 |
| 1 (0.2)    | 356 (80.5) | 85 (19.2)  | 1 (0.2)    | 0.98 (0.69 - 1.40) | 0.9146 |
| 38 (8.6)   | 208 (47.0) | 192 (43.3) | 43 (9.7)   | 1.00 (0.81 - 1.24) | 0.9986 |
| 1 (0.2)    | 367 (83.4) | 72 (16.4)  | 1 (0.2)    | 1.02 (0.71 - 1.47) | 0.9164 |
| 12 (2.7)   | 313 (71.0) | 114 (25.9) | 14 (3.2)   | 0.94 (0.72 - 1.22) | 0.6288 |
| 44 (10.0)  | 193 (43.9) | 198 (45.0) | 49 (11.1)  | 0.84 (0.68 - 1.04) | 0.1163 |
| 7 (1.6)    | 316 (72.3) | 114 (26.1) | 7 (1.6)    | 0.82 (0.61 - 1.09) | 0.175  |
| 12 (2.7)   | 286 (64.6) | 143 (32.3) | 14 (3.2)   | 0.87 (0.67 - 1.12) | 0.2667 |
| 6 (1.4)    | 362 (82.3) | 73 (16.6)  | 5 (1.1)    | 1.29 (0.94 - 1.77) | 0.1196 |
| 118 (26.7) | 133 (30.1) | 197 (44.6) | 112 (25.3) | 1.17 (0.97 - 1.42) | 0.0973 |
| 64 (14.4)  | 189 (42.7) | 194 (43.8) | 60 (13.5)  | 1.08 (0.88 - 1.31) | 0.4646 |
| 95 (21.4)  | 130 (29.3) | 214 (48.3) | 99 (22.3)  | 0.97 (0.79 - 1.18) | 0.7375 |
| 19 (4.3)   | 283 (63.9) | 141 (31.8) | 19 (4.3)   | 0.98 (0.77 - 1.25) | 0.8843 |
| 40 (9.0)   | 200 (45.2) | 193 (43.7) | 49 (11.1)  | 0.94 (0.77 - 1.16) | 0.5931 |
| 33 (7.5)   | 227 (51.7) | 182 (41.5) | 30 (6.8)   | 0.99 (0.79 - 1.24) | 0.9082 |
| 19 (4.3)   | 260 (59.2) | 158 (36.0) | 21 (4.8)   | 1.08 (0.84 - 1.38) | 0.5432 |
| 7 (1.6)    | 313 (71.1) | 118 (26.8) | 9 (2.0)    | 0.79 (0.58 - 1.07) | 0.1316 |
| 9 (2.0)    | 336 (76.2) | 99 (22.4)  | 6 (1.4)    | 1.34 (0.99 - 1.82) | 0.056  |
| 2 (0.5)    | 366 (83.0) | 71 (16.1)  | 4 (0.9)    | 0.82 (0.57 - 1.19) | 0.3007 |
| 24 (5.4)   | 256 (57.8) | 162 (36.6) | 25 (5.6)   | 1.01 (0.80 - 1.28) | 0.9272 |
| 55 (12.5)  | 186 (42.3) | 190 (43.2) | 64 (14.5)  | 0.85 (0.69 - 1.04) | 0.1066 |
| 24 (5.5)   | 249 (57.0) | 165 (37.8) | 23 (5.3)   | 1.00 (0.79 - 1.27) | 0.9893 |
| 14 (3.2)   | 286 (64.7) | 139 (31.4) | 17 (3.8)   | 0.95 (0.74 - 1.23) | 0.7136 |
| 3 (0.7)    | 388 (88.2) | 48 (10.9)  | 4 (0.9)    | 0.77 (0.52 - 1.16) | 0.2141 |
| 58 (13.1)  | 188 (42.5) | 202 (45.7) | 52 (11.8)  | 0.89 (0.73 - 1.09) | 0.2615 |
| 2 (0.5)    | 386 (87.5) | 52 (11.8)  | 3 (0.7)    | 0.72 (0.48 - 1.08) | 0.1107 |
| 37 (8.4)   | 219 (49.8) | 183 (41.6) | 38 (8.6)   | 0.96 (0.76 - 1.20) | 0.6914 |
| 0 (0.0)    | 388 (87.6) | 55 (12.4)  | 0 (0.0)    | 1.15 (0.76 - 1.74) | 0.5045 |
| 2 (0.5)    | 396 (90.0) | 42 (9.5)   | 2 (0.5)    | 1.16 (0.77 - 1.76) | 0.4741 |
| 3 (0.7)    | 398 (89.8) | 44 (9.9)   | 1 (0.2)    | 1.29 (0.84 - 1.97) | 0.2435 |
| 3 (0.7)    | 367 (83.0) | 71 (16.1)  | 4 (0.9)    | 0.73 (0.51 - 1.05) | 0.0864 |
| 2 (0.5)    | 383 (87.0) | 54 (12.3)  | 3 (0.7)    | 0.79 (0.52 - 1.19) | 0.2657 |
| 6 (1.4)    | 320 (72.2) | 116 (26.2) | 7 (1.6)    | 0.99 (0.75 - 1.32) | 0.9653 |
| 5 (1.1)    | 352 (79.8) | 81 (18.4)  | 8 (1.8)    | 1.11 (0.83 - 1.50) | 0.4761 |
| 3 (0.7)    | 344 (78.0) | 90 (20.4)  | 7 (1.6)    | 1.07 (0.78 - 1.47) | 0.6669 |
| 8 (1.8)    | 311 (70.5) | 115 (26.1) | 15 (3.4)   | 1.03 (0.80 - 1.34) | 0.8158 |
| 7 (1.6)    | 337 (76.1) | 96 (21.7)  | 10 (2.3)   | 1.03 (0.78 - 1.35) | 0.8451 |
| 4 (0.9)    | 389 (88.0) | 47 (10.6)  | 6 (1.4)    | 1.48 (1.03 - 2.13) | 0.0341 |
| 91 (20.6)  | 137 (31.0) | 217 (49.1) | 88 (19.9)  | 1.01 (0.84 - 1.23) | 0.8954 |
| 2 (0.5)    | 366 (82.8) | 71 (16.1)  | 5 (1.1)    | 1.22 (0.87 - 1.71) | 0.2408 |
| 73 (16.5)  | 138 (31.2) | 213 (48.2) | 91 (20.6)  | 0.90 (0.74 - 1.09) | 0.2809 |
| 0 (0.0)    | 372 (84.2) | 65 (14.7)  | 5 (1.1)    | 0.78 (0.54 - 1.12) | 0.1711 |
| 6 (1.4)    | 335 (76.7) | 93 (21.3)  | 9 (2.1)    | 1.24 (0.93 - 1.67) | 0.1423 |
| 73 (16.7)  | 138 (31.6) | 208 (47.6) | 91 (20.8)  | 0.89 (0.73 - 1.09) | 0.2669 |

|            |            |            |            |                    |        |
|------------|------------|------------|------------|--------------------|--------|
| 5 (1.1)    | 369 (83.5) | 68 (15.4)  | 5 (1.1)    | 0.96 (0.68 - 1.35) | 0.8033 |
| 94 (21.3)  | 157 (35.5) | 193 (43.7) | 92 (20.8)  | 1.12 (0.93 - 1.35) | 0.2247 |
| 29 (6.6)   | 233 (52.7) | 169 (38.2) | 40 (9.0)   | 0.93 (0.75 - 1.14) | 0.4775 |
| 57 (13.0)  | 168 (38.2) | 202 (45.9) | 70 (15.9)  | 0.90 (0.74 - 1.10) | 0.3187 |
| 103 (23.4) | 115 (26.1) | 208 (47.2) | 118 (26.8) | 0.94 (0.78 - 1.14) | 0.5473 |
| 51 (11.5)  | 200 (45.2) | 186 (42.1) | 56 (12.7)  | 1.01 (0.84 - 1.23) | 0.8852 |
| 4 (0.9)    | 385 (87.1) | 51 (11.5)  | 6 (1.4)    | 1.40 (0.98 - 2.00) | 0.0628 |
| 0 (0.0)    | 392 (89.3) | 46 (10.5)  | 1 (0.2)    | 1.33 (0.87 - 2.04) | 0.1901 |
| 2 (0.5)    | 382 (87.0) | 55 (12.5)  | 2 (0.5)    | 1.54 (1.06 - 2.23) | 0.0236 |
| 0 (0.0)    | 394 (89.3) | 45 (10.2)  | 2 (0.5)    | 1.38 (0.92 - 2.07) | 0.1162 |
| 35 (7.9)   | 223 (50.5) | 172 (38.9) | 47 (10.6)  | 0.92 (0.75 - 1.14) | 0.4542 |
| 25 (5.7)   | 228 (51.7) | 190 (43.1) | 23 (5.2)   | 0.90 (0.73 - 1.12) | 0.3529 |
| 1 (0.2)    | 389 (87.8) | 52 (11.7)  | 2 (0.5)    | 0.98 (0.66 - 1.44) | 0.912  |
| 21 (4.7)   | 251 (56.7) | 163 (36.8) | 29 (6.5)   | 0.93 (0.74 - 1.16) | 0.5051 |
| 1 (0.2)    | 403 (91.2) | 39 (8.8)   | 0 (0.0)    | 0.87 (0.54 - 1.42) | 0.5843 |
| 61 (13.8)  | 174 (39.4) | 197 (44.6) | 71 (16.1)  | 0.96 (0.79 - 1.16) | 0.6372 |
| 5 (1.1)    | 369 (83.3) | 73 (16.5)  | 1 (0.2)    | 1.01 (0.72 - 1.42) | 0.9423 |
| 2 (0.5)    | 357 (80.8) | 80 (18.1)  | 5 (1.1)    | 0.90 (0.65 - 1.24) | 0.5072 |
| 94 (21.3)  | 125 (28.3) | 229 (51.8) | 88 (19.9)  | 0.99 (0.81 - 1.20) | 0.9075 |
| 14 (3.2)   | 331 (75.1) | 97 (22.0)  | 13 (2.9)   | 1.29 (0.99 - 1.69) | 0.0593 |
| 21 (4.8)   | 300 (68.6) | 123 (28.1) | 14 (3.2)   | 1.60 (1.23 - 2.07) | 0.0004 |
| 28 (6.3)   | 285 (64.5) | 135 (30.5) | 22 (5.0)   | 1.20 (0.95 - 1.52) | 0.1261 |
| 30 (6.8)   | 229 (51.7) | 180 (40.6) | 34 (7.7)   | 0.98 (0.78 - 1.23) | 0.8718 |
| 34 (7.7)   | 225 (50.9) | 181 (41.0) | 36 (8.1)   | 0.96 (0.77 - 1.18) | 0.6736 |
| 56 (12.7)  | 180 (40.7) | 213 (48.2) | 49 (11.1)  | 1.04 (0.85 - 1.26) | 0.7296 |
| 2 (0.5)    | 403 (91.0) | 39 (8.8)   | 1 (0.2)    | 0.99 (0.64 - 1.54) | 0.964  |
| 62 (14.0)  | 164 (37.0) | 206 (46.5) | 73 (16.5)  | 1.06 (0.87 - 1.30) | 0.5452 |
| 38 (8.6)   | 234 (53.1) | 172 (39.0) | 35 (7.9)   | 0.99 (0.80 - 1.23) | 0.9168 |
| 15 (3.4)   | 267 (60.4) | 155 (35.1) | 20 (4.5)   | 0.88 (0.69 - 1.11) | 0.2798 |
| 15 (3.4)   | 331 (75.2) | 97 (22.0)  | 12 (2.7)   | 1.33 (1.02 - 1.74) | 0.0378 |
| 18 (4.1)   | 288 (65.2) | 125 (28.3) | 29 (6.6)   | 1.11 (0.87 - 1.40) | 0.4008 |
| 23 (5.2)   | 303 (68.9) | 119 (27.0) | 18 (4.1)   | 1.20 (0.94 - 1.53) | 0.1466 |
| 13 (2.9)   | 349 (79.0) | 84 (19.0)  | 9 (2.0)    | 1.44 (1.08 - 1.92) | 0.014  |
| 17 (3.9)   | 341 (77.3) | 89 (20.2)  | 11 (2.5)   | 1.44 (1.09 - 1.90) | 0.0105 |
| 0 (0.0)    | 403 (91.2) | 39 (8.8)   | 0 (0.0)    | 0.77 (0.47 - 1.27) | 0.3127 |
| 3 (0.7)    | 380 (85.8) | 60 (13.5)  | 3 (0.7)    | 0.94 (0.65 - 1.37) | 0.7455 |



| PD susceptibility:<br>CC<br>Dominant Model<br>OR (95%CI) | PD susceptibility:<br>CC<br>Dominant<br>P-value | PD susceptibility:<br>Recessive Model<br>OR (95%CI) | CC<br>PD susceptibility:<br>CC<br>Recessive<br>P-value | CS<br>Genotype n(%)<br>1/1<br>Cases | CS<br>Genotype n(%)<br>1/2<br>Cases |
|----------------------------------------------------------|-------------------------------------------------|-----------------------------------------------------|--------------------------------------------------------|-------------------------------------|-------------------------------------|
| 0.95 (0.72 - 1.25)                                       | 0.7068                                          | 1.04 (0.70 - 1.53)                                  | 0.8602                                                 | 239 (37.6)                          | 298 (46.9)                          |
| 1.02 (0.77 - 1.34)                                       | 0.8835                                          | 0.79 (0.55 - 1.13)                                  | 0.1974                                                 | 212 (33.0)                          | 303 (47.2)                          |
| 0.94 (0.66 - 1.34)                                       | 0.7361                                          | 0.74 (0.19 - 2.80)                                  | 0.6525                                                 | 535 (83.2)                          | 104 (16.2)                          |
| 1.34 (0.78 - 2.30)                                       | 0.2929                                          | 0.00 (0.00 - )                                      | 0.9871                                                 | 581 (90.6)                          | 60 (9.4)                            |
| 1.12 (0.83 - 1.53)                                       | 0.4567                                          | 0.94 (0.68 - 1.30)                                  | 0.697                                                  | 172 (26.7)                          | 323 (50.2)                          |
| 1.09 (0.81 - 1.45)                                       | 0.5742                                          | 0.79 (0.57 - 1.10)                                  | 0.1628                                                 | 227 (35.3)                          | 316 (49.1)                          |
| 1.11 (0.82 - 1.49)                                       | 0.499                                           | 0.79 (0.57 - 1.09)                                  | 0.1459                                                 | 193 (30.0)                          | 327 (50.9)                          |
| 1.20 (0.88 - 1.64)                                       | 0.24                                            | 1.27 (0.48 - 3.36)                                  | 0.6335                                                 | 495 (77.1)                          | 136 (21.2)                          |
| 1.05 (0.79 - 1.39)                                       | 0.7535                                          | 0.98 (0.67 - 1.41)                                  | 0.8963                                                 | 224 (34.9)                          | 299 (46.6)                          |
| 1.11 (0.82 - 1.49)                                       | 0.5019                                          | 0.80 (0.58 - 1.10)                                  | 0.1685                                                 | 193 (30.0)                          | 327 (50.8)                          |
| 1.01 (0.65 - 1.59)                                       | 0.9488                                          | 0.99 (0.14 - 7.25)                                  | 0.9918                                                 | 576 (89.9)                          | 62 (9.7)                            |
| 1.33 (0.96 - 1.85)                                       | 0.0862                                          | 0.38 (0.12 - 1.27)                                  | 0.1156                                                 | 491 (76.4)                          | 144 (22.4)                          |
| 1.08 (0.75 - 1.55)                                       | 0.6842                                          | 0.43 (0.04 - 4.34)                                  | 0.4752                                                 | 508 (79.0)                          | 132 (20.5)                          |
| 1.13 (0.87 - 1.47)                                       | 0.3607                                          | 0.71 (0.38 - 1.32)                                  | 0.2742                                                 | 357 (55.6)                          | 242 (37.7)                          |
| 1.08 (0.72 - 1.62)                                       | 0.7101                                          | 1.85 (0.33 - 10.23)                                 | 0.4812                                                 | 535 (83.2)                          | 102 (15.9)                          |
| 1.00 (0.73 - 1.38)                                       | 0.9939                                          | 1.43 (0.48 - 4.28)                                  | 0.5199                                                 | 482 (75.0)                          | 150 (23.3)                          |
| 1.01 (0.75 - 1.37)                                       | 0.9226                                          | 0.75 (0.33 - 1.69)                                  | 0.4865                                                 | 438 (68.2)                          | 174 (27.1)                          |
| 0.90 (0.69 - 1.18)                                       | 0.4434                                          | 1.26 (0.74 - 2.13)                                  | 0.3936                                                 | 345 (53.8)                          | 247 (38.5)                          |
| 0.97 (0.74 - 1.29)                                       | 0.8513                                          | 1.25 (0.63 - 2.48)                                  | 0.5309                                                 | 417 (65.0)                          | 203 (31.6)                          |
| 0.75 (0.54 - 1.03)                                       | 0.0708                                          | 1.25 (0.92 - 1.69)                                  | 0.152                                                  | 171 (26.6)                          | 325 (50.5)                          |
| 0.92 (0.61 - 1.39)                                       | 0.6915                                          | 0.97 (0.13 - 6.95)                                  | 0.9736                                                 | 571 (89.1)                          | 67 (10.5)                           |
| 1.20 (0.89 - 1.62)                                       | 0.2356                                          | 0.80 (0.58 - 1.10)                                  | 0.1698                                                 | 161 (25.2)                          | 314 (49.1)                          |
| 0.85 (0.61 - 1.19)                                       | 0.3468                                          | 0.94 (0.31 - 2.86)                                  | 0.9115                                                 | 543 (84.3)                          | 94 (14.6)                           |
| 1.06 (0.80 - 1.42)                                       | 0.6776                                          | 0.87 (0.62 - 1.23)                                  | 0.4382                                                 | 200 (31.1)                          | 321 (49.9)                          |
| 1.16 (0.89 - 1.51)                                       | 0.2628                                          | 0.97 (0.57 - 1.64)                                  | 0.9061                                                 | 366 (57.1)                          | 245 (38.2)                          |
| 1.25 (0.95 - 1.66)                                       | 0.1149                                          | 1.19 (0.50 - 2.85)                                  | 0.6933                                                 | 445 (69.4)                          | 182 (28.4)                          |
| 0.89 (0.68 - 1.17)                                       | 0.4083                                          | 1.01 (0.67 - 1.53)                                  | 0.967                                                  | 280 (43.6)                          | 291 (45.3)                          |
| 1.01 (0.76 - 1.34)                                       | 0.9506                                          | 1.04 (0.53 - 2.04)                                  | 0.9021                                                 | 390 (60.7)                          | 219 (34.1)                          |
| 0.99 (0.76 - 1.29)                                       | 0.9229                                          | 1.08 (0.64 - 1.84)                                  | 0.7676                                                 | 358 (55.7)                          | 238 (37.0)                          |
| 1.15 (0.84 - 1.56)                                       | 0.3846                                          | 1.00 (0.73 - 1.37)                                  | 0.989                                                  | 161 (25.0)                          | 325 (50.5)                          |
| 1.41 (1.07 - 1.85)                                       | 0.0139                                          | 0.64 (0.43 - 0.97)                                  | 0.0361                                                 | 218 (33.9)                          | 315 (48.9)                          |
| 0.96 (0.72 - 1.28)                                       | 0.7835                                          | 0.89 (0.37 - 2.12)                                  | 0.7901                                                 | 412 (64.1)                          | 215 (33.4)                          |
| 0.95 (0.72 - 1.24)                                       | 0.7053                                          | 0.74 (0.48 - 1.13)                                  | 0.1592                                                 | 284 (44.2)                          | 282 (43.9)                          |
| 0.92 (0.68 - 1.23)                                       | 0.5769                                          | 0.89 (0.40 - 2.00)                                  | 0.7841                                                 | 479 (75.0)                          | 144 (22.5)                          |
| 1.00 (0.76 - 1.33)                                       | 0.9792                                          | 1.01 (0.52 - 1.95)                                  | 0.9782                                                 | 407 (63.3)                          | 205 (31.9)                          |
| 1.03 (0.66 - 1.62)                                       | 0.8884                                          | 0.69 (0.18 - 2.63)                                  | 0.5851                                                 | 568 (89.7)                          | 53 (8.4)                            |
| 1.34 (0.94 - 1.90)                                       | 0.1043                                          | 2.02 (0.57 - 7.12)                                  | 0.2765                                                 | 523 (81.2)                          | 112 (17.4)                          |
| 1.34 (0.92 - 1.96)                                       | 0.1314                                          | 4.11 (0.76 - 22.12)                                 | 0.0996                                                 | 534 (83.0)                          | 100 (15.6)                          |
| 0.85 (0.57 - 1.27)                                       | 0.4201                                          | 0.65 (0.18 - 2.37)                                  | 0.5101                                                 | 553 (86.4)                          | 84 (13.1)                           |
| 0.43 (0.23 - 0.80)                                       | 0.0084                                          | 0.00 (0.00 - )                                      | 0.9868                                                 | 601 (93.3)                          | 42 (6.5)                            |
| 1.15 (0.78 - 1.71)                                       | 0.4729                                          | 0.99 (0.14 - 7.02)                                  | 0.9887                                                 | 550 (85.4)                          | 91 (14.1)                           |
| 0.88 (0.67 - 1.16)                                       | 0.3813                                          | 0.74 (0.48 - 1.14)                                  | 0.167                                                  | 296 (46.2)                          | 288 (44.9)                          |
| 1.10 (0.82 - 1.46)                                       | 0.5195                                          | 1.34 (0.60 - 3.00)                                  | 0.4732                                                 | 432 (67.3)                          | 189 (29.4)                          |
| 0.71 (0.53 - 0.96)                                       | 0.0241                                          | 0.79 (0.54 - 1.15)                                  | 0.2169                                                 | 219 (34.2)                          | 315 (49.1)                          |
| 0.97 (0.72 - 1.31)                                       | 0.841                                           | 0.95 (0.68 - 1.33)                                  | 0.7773                                                 | 182 (28.3)                          | 311 (48.4)                          |
| 1.00 (0.76 - 1.33)                                       | 0.9827                                          | 1.42 (0.85 - 2.36)                                  | 0.179                                                  | 329 (51.2)                          | 269 (41.8)                          |
| 1.06 (0.80 - 1.42)                                       | 0.6721                                          | 0.86 (0.54 - 1.39)                                  | 0.5421                                                 | 330 (51.4)                          | 260 (40.5)                          |
| 1.04 (0.76 - 1.42)                                       | 0.806                                           | 0.66 (0.23 - 1.94)                                  | 0.4518                                                 | 485 (75.3)                          | 151 (23.4)                          |

|                    |        |                     |        |            |            |
|--------------------|--------|---------------------|--------|------------|------------|
| 1.11 (0.81 - 1.52) | 0.5054 | 0.80 (0.36 - 1.79)  | 0.5911 | 474 (73.8) | 157 (24.5) |
| 1.01 (0.77 - 1.33) | 0.9425 | 0.74 (0.45 - 1.23)  | 0.2473 | 324 (50.5) | 256 (39.9) |
| 1.03 (0.78 - 1.37) | 0.8247 | 0.96 (0.51 - 1.78)  | 0.8891 | 375 (58.4) | 231 (36.0) |
| 0.81 (0.61 - 1.06) | 0.1285 | 0.87 (0.45 - 1.67)  | 0.6763 | 372 (57.9) | 235 (36.5) |
| 0.87 (0.66 - 1.15) | 0.3319 | 0.80 (0.51 - 1.25)  | 0.3247 | 313 (48.8) | 264 (41.1) |
| 1.10 (0.81 - 1.49) | 0.54   | 0.94 (0.67 - 1.33)  | 0.7332 | 201 (31.3) | 319 (49.6) |
| 0.77 (0.58 - 1.02) | 0.0691 | 1.39 (0.74 - 2.61)  | 0.3064 | 385 (59.8) | 226 (35.1) |
| 0.99 (0.73 - 1.33) | 0.9399 | 0.43 (0.20 - 0.93)  | 0.0328 | 432 (67.1) | 194 (30.1) |
| 0.95 (0.71 - 1.28) | 0.7449 | 0.55 (0.26 - 1.18)  | 0.124  | 451 (70.4) | 174 (27.1) |
| 1.13 (0.85 - 1.50) | 0.4015 | 0.97 (0.61 - 1.55)  | 0.9108 | 305 (47.4) | 281 (43.7) |
| 0.98 (0.68 - 1.40) | 0.9154 | 0.98 (0.06 - 15.68) | 0.9882 | 534 (83.2) | 104 (16.2) |
| 1.08 (0.81 - 1.44) | 0.589  | 0.81 (0.51 - 1.29)  | 0.3798 | 336 (52.3) | 254 (39.5) |
| 1.02 (0.70 - 1.48) | 0.9141 | 0.98 (0.06 - 15.69) | 0.9884 | 543 (84.4) | 96 (14.9)  |
| 0.94 (0.69 - 1.29) | 0.7017 | 0.83 (0.37 - 1.82)  | 0.6357 | 471 (73.4) | 156 (24.3) |
| 0.80 (0.60 - 1.06) | 0.1198 | 0.82 (0.53 - 1.29)  | 0.3971 | 309 (48.0) | 280 (43.5) |
| 0.79 (0.57 - 1.09) | 0.1487 | 0.92 (0.31 - 2.73)  | 0.874  | 505 (78.8) | 130 (20.3) |
| 0.85 (0.64 - 1.14) | 0.2806 | 0.81 (0.36 - 1.82)  | 0.6175 | 426 (66.3) | 201 (31.3) |
| 1.32 (0.94 - 1.87) | 0.1138 | 1.31 (0.38 - 4.50)  | 0.6676 | 519 (80.8) | 116 (18.1) |
| 1.44 (1.05 - 1.96) | 0.0228 | 1.07 (0.78 - 1.46)  | 0.6774 | 177 (27.5) | 319 (49.6) |
| 1.11 (0.84 - 1.46) | 0.4732 | 1.10 (0.73 - 1.64)  | 0.65   | 282 (44.0) | 279 (43.5) |
| 0.96 (0.70 - 1.31) | 0.7852 | 0.96 (0.69 - 1.33)  | 0.7868 | 181 (28.2) | 328 (51.1) |
| 0.97 (0.72 - 1.29) | 0.8219 | 1.04 (0.54 - 2.01)  | 0.9117 | 423 (65.7) | 195 (30.3) |
| 0.99 (0.75 - 1.30) | 0.927  | 0.79 (0.50 - 1.25)  | 0.3071 | 322 (50.0) | 269 (41.8) |
| 0.97 (0.73 - 1.29) | 0.832  | 1.04 (0.60 - 1.77)  | 0.899  | 350 (54.6) | 254 (39.6) |
| 1.10 (0.83 - 1.47) | 0.5006 | 1.03 (0.52 - 2.05)  | 0.9275 | 389 (60.5) | 223 (34.7) |
| 0.78 (0.56 - 1.09) | 0.149  | 0.65 (0.21 - 1.99)  | 0.4459 | 482 (75.3) | 142 (22.2) |
| 1.37 (0.98 - 1.91) | 0.0668 | 1.63 (0.56 - 4.78)  | 0.3698 | 460 (71.4) | 164 (25.5) |
| 0.84 (0.56 - 1.25) | 0.3812 | 0.42 (0.07 - 2.42)  | 0.3285 | 535 (83.7) | 102 (16.0) |
| 1.06 (0.80 - 1.40) | 0.7048 | 0.84 (0.46 - 1.54)  | 0.5663 | 378 (58.8) | 232 (36.1) |
| 0.77 (0.58 - 1.01) | 0.0634 | 0.89 (0.59 - 1.35)  | 0.578  | 284 (44.3) | 290 (45.2) |
| 0.98 (0.73 - 1.30) | 0.868  | 1.10 (0.60 - 2.01)  | 0.7521 | 375 (58.4) | 233 (36.3) |
| 0.96 (0.72 - 1.28) | 0.7976 | 0.85 (0.40 - 1.80)  | 0.6695 | 415 (64.4) | 200 (31.1) |
| 0.73 (0.46 - 1.14) | 0.1652 | 1.00 (0.21 - 4.68)  | 0.9984 | 571 (89.1) | 67 (10.5)  |
| 0.79 (0.60 - 1.03) | 0.0867 | 1.08 (0.70 - 1.64)  | 0.7353 | 275 (42.8) | 299 (46.6) |
| 0.69 (0.44 - 1.07) | 0.099  | 0.73 (0.12 - 4.58)  | 0.7365 | 586 (91.0) | 55 (8.5)   |
| 0.92 (0.70 - 1.23) | 0.5837 | 1.03 (0.62 - 1.71)  | 0.9243 | 345 (54.1) | 244 (38.2) |
| 1.15 (0.76 - 1.74) | 0.5045 | (-)                 | --     | 565 (87.9) | 76 (11.8)  |
| 1.20 (0.77 - 1.87) | 0.4238 | 0.87 (0.12 - 6.20)  | 0.8857 | 575 (89.4) | 65 (10.1)  |
| 1.29 (0.82 - 2.01) | 0.2725 | 2.10 (0.21 - 21.13) | 0.5288 | 552 (85.7) | 87 (13.5)  |
| 0.70 (0.47 - 1.03) | 0.0728 | 0.83 (0.17 - 3.92)  | 0.8107 | 536 (83.5) | 103 (16.0) |
| 0.78 (0.50 - 1.22) | 0.2776 | 0.64 (0.10 - 4.19)  | 0.646  | 568 (88.6) | 73 (11.4)  |
| 1.01 (0.74 - 1.37) | 0.9573 | 0.78 (0.23 - 2.67)  | 0.687  | 472 (73.4) | 161 (25.0) |
| 1.19 (0.85 - 1.66) | 0.311  | 0.65 (0.21 - 2.06)  | 0.4668 | 505 (78.7) | 127 (19.8) |
| 1.14 (0.81 - 1.60) | 0.458  | 0.47 (0.12 - 1.93)  | 0.2979 | 495 (76.9) | 144 (22.4) |
| 1.13 (0.84 - 1.51) | 0.4328 | 0.51 (0.21 - 1.25)  | 0.1413 | 470 (73.1) | 162 (25.2) |
| 1.08 (0.79 - 1.47) | 0.6444 | 0.68 (0.25 - 1.85)  | 0.4547 | 483 (75.1) | 148 (23.0) |
| 1.74 (1.16 - 2.59) | 0.0069 | 0.45 (0.13 - 1.63)  | 0.2262 | 540 (83.9) | 97 (15.1)  |
| 1.05 (0.78 - 1.40) | 0.754  | 0.98 (0.70 - 1.37)  | 0.8952 | 192 (30.0) | 312 (48.8) |
| 1.30 (0.91 - 1.86) | 0.1474 | 0.48 (0.09 - 2.50)  | 0.3857 | 519 (80.6) | 119 (18.5) |
| 0.94 (0.70 - 1.28) | 0.7095 | 0.78 (0.55 - 1.09)  | 0.1486 | 216 (33.6) | 311 (48.4) |
| 0.83 (0.56 - 1.22) | 0.3417 | 0.00 (0.00 - )      | 0.9862 | 550 (85.4) | 89 (13.8)  |
| 1.38 (1.00 - 1.91) | 0.0498 | 0.56 (0.19 - 1.59)  | 0.2737 | 477 (74.2) | 148 (23.0) |
| 0.94 (0.69 - 1.27) | 0.6791 | 0.78 (0.55 - 1.09)  | 0.1457 | 218 (34.1) | 308 (48.1) |

|                    |        |                     |        |            |            |
|--------------------|--------|---------------------|--------|------------|------------|
| 0.96 (0.66 - 1.40) | 0.8248 | 0.89 (0.25 - 3.16)  | 0.8594 | 516 (80.1) | 124 (19.3) |
| 1.28 (0.96 - 1.71) | 0.0873 | 1.04 (0.74 - 1.45)  | 0.8345 | 218 (33.9) | 315 (49.0) |
| 0.99 (0.75 - 1.30) | 0.9296 | 0.68 (0.41 - 1.12)  | 0.1297 | 364 (56.7) | 232 (36.1) |
| 0.95 (0.72 - 1.26) | 0.7355 | 0.75 (0.51 - 1.10)  | 0.1435 | 251 (39.0) | 285 (44.3) |
| 1.00 (0.74 - 1.37) | 0.9771 | 0.85 (0.63 - 1.16)  | 0.309  | 165 (25.7) | 313 (48.7) |
| 1.08 (0.83 - 1.40) | 0.5775 | 0.89 (0.60 - 1.34)  | 0.5847 | 305 (47.4) | 270 (41.9) |
| 1.62 (1.09 - 2.39) | 0.016  | 0.45 (0.13 - 1.63)  | 0.2257 | 537 (83.4) | 99 (15.4)  |
| 1.37 (0.89 - 2.10) | 0.1548 | 0.00 (0.00 - )      | 0.9857 | 568 (88.6) | 71 (11.1)  |
| 1.58 (1.07 - 2.32) | 0.0199 | 1.10 (0.15 - 7.93)  | 0.9257 | 546 (85.6) | 89 (13.9)  |
| 1.46 (0.97 - 2.21) | 0.0721 | 0.00 (0.00 - )      | 0.9869 | 575 (89.4) | 65 (10.1)  |
| 1.01 (0.77 - 1.32) | 0.959  | 0.66 (0.42 - 1.05)  | 0.0821 | 347 (53.9) | 243 (37.7) |
| 0.83 (0.64 - 1.09) | 0.1775 | 1.16 (0.64 - 2.12)  | 0.6196 | 334 (51.9) | 272 (42.3) |
| 1.00 (0.67 - 1.50) | 0.997  | 0.45 (0.04 - 4.98)  | 0.5125 | 547 (85.2) | 93 (14.5)  |
| 0.96 (0.73 - 1.27) | 0.791  | 0.71 (0.40 - 1.27)  | 0.253  | 382 (59.4) | 221 (34.4) |
| 0.84 (0.51 - 1.39) | 0.4988 | 459478.2 (0.00 - )  | 0.9859 | 598 (93.1) | 43 (6.7)   |
| 0.99 (0.75 - 1.30) | 0.9421 | 0.86 (0.60 - 1.24)  | 0.4206 | 254 (39.5) | 309 (48.1) |
| 0.95 (0.66 - 1.37) | 0.7852 | 5.12 (0.57 - 45.54) | 0.1434 | 530 (82.4) | 108 (16.8) |
| 0.91 (0.65 - 1.29) | 0.5997 | 0.52 (0.10 - 2.73)  | 0.4364 | 522 (81.3) | 116 (18.1) |
| 0.92 (0.68 - 1.25) | 0.6051 | 1.07 (0.76 - 1.52)  | 0.6934 | 169 (26.3) | 330 (51.3) |
| 1.39 (1.02 - 1.90) | 0.0391 | 1.15 (0.53 - 2.49)  | 0.7284 | 459 (71.4) | 163 (25.3) |
| 1.77 (1.30 - 2.39) | 0.0002 | 1.50 (0.75 - 3.01)  | 0.2566 | 419 (65.4) | 193 (30.1) |
| 1.25 (0.94 - 1.67) | 0.1228 | 1.24 (0.68 - 2.26)  | 0.4857 | 389 (60.4) | 213 (33.1) |
| 1.02 (0.76 - 1.36) | 0.9085 | 0.86 (0.51 - 1.45)  | 0.5607 | 332 (51.7) | 258 (40.2) |
| 0.95 (0.73 - 1.24) | 0.717  | 0.92 (0.55 - 1.53)  | 0.7526 | 341 (53.1) | 250 (38.9) |
| 0.99 (0.76 - 1.29) | 0.9508 | 1.19 (0.79 - 1.81)  | 0.4101 | 245 (38.1) | 310 (48.2) |
| 0.97 (0.61 - 1.56) | 0.9125 | 1.46 (0.13 - 16.54) | 0.7603 | 579 (89.9) | 63 (9.8)   |
| 1.24 (0.92 - 1.67) | 0.1613 | 0.88 (0.61 - 1.29)  | 0.5153 | 229 (35.6) | 298 (46.3) |
| 0.94 (0.71 - 1.25) | 0.6577 | 1.15 (0.70 - 1.89)  | 0.5907 | 353 (54.8) | 246 (38.2) |
| 0.88 (0.67 - 1.16) | 0.3572 | 0.74 (0.37 - 1.47)  | 0.3856 | 374 (58.3) | 239 (37.2) |
| 1.41 (1.03 - 1.93) | 0.0334 | 1.35 (0.62 - 2.95)  | 0.4469 | 460 (71.5) | 163 (25.3) |
| 1.27 (0.96 - 1.70) | 0.0995 | 0.67 (0.37 - 1.24)  | 0.2031 | 391 (60.8) | 218 (33.9) |
| 1.26 (0.94 - 1.69) | 0.1177 | 1.15 (0.60 - 2.22)  | 0.679  | 415 (64.6) | 200 (31.2) |
| 1.53 (1.10 - 2.13) | 0.0122 | 1.47 (0.61 - 3.52)  | 0.3874 | 471 (73.8) | 152 (23.8) |
| 1.53 (1.11 - 2.12) | 0.01   | 1.51 (0.69 - 3.28)  | 0.3039 | 463 (72.0) | 161 (25.0) |
| 0.77 (0.47 - 1.27) | 0.3127 | ( - )               | --     | 589 (91.6) | 52 (8.1)   |
| 0.93 (0.62 - 1.38) | 0.7152 | 1.08 (0.20 - 5.80)  | 0.9323 | 558 (86.9) | 82 (12.8)  |

| CS<br>Genotype n(%)<br>2/2<br>Cases | CS<br>Genotype n(%)<br>1/1<br>Controls | CS<br>Genotype n(%)<br>1/2<br>Controls | CS<br>Genotype n(%)<br>2/2<br>Controls | PD susceptibility:<br>Trend Model<br>OR (95%CI) | CS<br>PD susceptibility:<br>Trend<br>P-value |
|-------------------------------------|----------------------------------------|----------------------------------------|----------------------------------------|-------------------------------------------------|----------------------------------------------|
| 98 (15.4)                           | 238 (37.5)                             | 303 (47.7)                             | 94 (14.8)                              | 0.99 (0.78 - 1.26)                              | 0.9277                                       |
| 127 (19.8)                          | 195 (30.4)                             | 326 (50.8)                             | 121 (18.8)                             | 0.89 (0.70 - 1.12)                              | 0.3154                                       |
| 4 (0.6)                             | 527 (82.0)                             | 110 (17.1)                             | 6 (0.9)                                | 0.80 (0.53 - 1.20)                              | 0.2801                                       |
| 0 (0.0)                             | 589 (91.9)                             | 51 (8.0)                               | 1 (0.2)                                | 1.52 (0.86 - 2.70)                              | 0.1499                                       |
| 148 (23.0)                          | 162 (25.2)                             | 322 (50.1)                             | 159 (24.7)                             | 0.82 (0.65 - 1.04)                              | 0.1013                                       |
| 100 (15.6)                          | 233 (36.2)                             | 318 (49.5)                             | 92 (14.3)                              | 1.19 (0.94 - 1.51)                              | 0.1376                                       |
| 123 (19.1)                          | 203 (31.6)                             | 321 (49.9)                             | 119 (18.5)                             | 1.17 (0.92 - 1.48)                              | 0.1964                                       |
| 11 (1.7)                            | 486 (75.7)                             | 143 (22.3)                             | 13 (2.0)                               | 0.84 (0.61 - 1.18)                              | 0.3156                                       |
| 118 (18.4)                          | 204 (31.8)                             | 329 (51.3)                             | 108 (16.8)                             | 0.91 (0.72 - 1.14)                              | 0.4022                                       |
| 124 (19.3)                          | 203 (31.5)                             | 322 (50.0)                             | 119 (18.5)                             | 1.18 (0.93 - 1.49)                              | 0.1766                                       |
| 3 (0.5)                             | 574 (89.5)                             | 66 (10.3)                              | 1 (0.2)                                | 0.96 (0.56 - 1.66)                              | 0.8933                                       |
| 8 (1.2)                             | 508 (79.0)                             | 122 (19.0)                             | 13 (2.0)                               | 1.32 (0.93 - 1.87)                              | 0.1242                                       |
| 3 (0.5)                             | 520 (80.9)                             | 120 (18.7)                             | 3 (0.5)                                | 1.25 (0.84 - 1.85)                              | 0.2703                                       |
| 43 (6.7)                            | 360 (56.1)                             | 249 (38.8)                             | 33 (5.1)                               | 1.08 (0.83 - 1.40)                              | 0.5773                                       |
| 6 (0.9)                             | 537 (83.5)                             | 101 (15.7)                             | 5 (0.8)                                | 1.06 (0.69 - 1.62)                              | 0.7972                                       |
| 11 (1.7)                            | 492 (76.5)                             | 136 (21.2)                             | 15 (2.3)                               | 1.05 (0.74 - 1.48)                              | 0.792                                        |
| 30 (4.7)                            | 435 (67.8)                             | 189 (29.4)                             | 18 (2.8)                               | 1.01 (0.74 - 1.38)                              | 0.9274                                       |
| 49 (7.6)                            | 352 (54.9)                             | 249 (38.8)                             | 40 (6.2)                               | 1.14 (0.88 - 1.48)                              | 0.3087                                       |
| 22 (3.4)                            | 431 (67.1)                             | 190 (29.6)                             | 21 (3.3)                               | 1.16 (0.86 - 1.55)                              | 0.3353                                       |
| 147 (22.9)                          | 179 (27.8)                             | 319 (49.6)                             | 145 (22.6)                             | 1.07 (0.86 - 1.35)                              | 0.5356                                       |
| 3 (0.5)                             | 578 (90.2)                             | 63 (9.8)                               | 0 (0.0)                                | 1.39 (0.86 - 2.24)                              | 0.1833                                       |
| 164 (25.7)                          | 158 (24.7)                             | 319 (49.9)                             | 162 (25.4)                             | 0.93 (0.74 - 1.16)                              | 0.5074                                       |
| 7 (1.1)                             | 511 (79.3)                             | 128 (19.9)                             | 5 (0.8)                                | 0.57 (0.39 - 0.84)                              | 0.0048                                       |
| 122 (19.0)                          | 186 (28.9)                             | 327 (50.9)                             | 130 (20.2)                             | 0.81 (0.63 - 1.03)                              | 0.0852                                       |
| 30 (4.7)                            | 367 (57.3)                             | 244 (38.1)                             | 30 (4.7)                               | 1.07 (0.82 - 1.40)                              | 0.6161                                       |
| 14 (2.2)                            | 449 (70.0)                             | 175 (27.3)                             | 17 (2.7)                               | 1.03 (0.75 - 1.40)                              | 0.8756                                       |
| 71 (11.1)                           | 295 (46.0)                             | 291 (45.3)                             | 56 (8.7)                               | 1.25 (0.98 - 1.60)                              | 0.0724                                       |
| 33 (5.1)                            | 397 (61.8)                             | 215 (33.5)                             | 30 (4.7)                               | 1.05 (0.80 - 1.39)                              | 0.7212                                       |
| 47 (7.3)                            | 333 (51.8)                             | 260 (40.4)                             | 50 (7.8)                               | 0.77 (0.60 - 1.00)                              | 0.0493                                       |
| 157 (24.4)                          | 151 (23.5)                             | 326 (50.7)                             | 166 (25.8)                             | 0.84 (0.66 - 1.06)                              | 0.1359                                       |
| 111 (17.2)                          | 229 (35.6)                             | 305 (47.4)                             | 110 (17.1)                             | 1.04 (0.82 - 1.32)                              | 0.7314                                       |
| 16 (2.5)                            | 431 (67.0)                             | 197 (30.6)                             | 15 (2.3)                               | 1.25 (0.92 - 1.70)                              | 0.153                                        |
| 77 (12.0)                           | 259 (40.3)                             | 313 (48.7)                             | 71 (11.0)                              | 0.84 (0.66 - 1.07)                              | 0.1599                                       |
| 16 (2.5)                            | 448 (70.1)                             | 177 (27.7)                             | 14 (2.2)                               | 0.66 (0.48 - 0.92)                              | 0.0135                                       |
| 31 (4.8)                            | 401 (62.4)                             | 217 (33.7)                             | 25 (3.9)                               | 1.00 (0.75 - 1.32)                              | 0.9759                                       |
| 12 (1.9)                            | 568 (89.7)                             | 50 (7.9)                               | 15 (2.4)                               | 0.86 (0.55 - 1.35)                              | 0.5215                                       |
| 9 (1.4)                             | 517 (80.3)                             | 119 (18.5)                             | 8 (1.2)                                | 0.91 (0.63 - 1.31)                              | 0.5986                                       |
| 9 (1.4)                             | 530 (82.4)                             | 104 (16.2)                             | 9 (1.4)                                | 0.97 (0.67 - 1.39)                              | 0.8632                                       |
| 3 (0.5)                             | 564 (88.1)                             | 68 (10.6)                              | 8 (1.3)                                | 1.22 (0.79 - 1.88)                              | 0.3799                                       |
| 1 (0.2)                             | 608 (94.4)                             | 36 (5.6)                               | 0 (0.0)                                | 1.42 (0.77 - 2.62)                              | 0.2602                                       |
| 3 (0.5)                             | 540 (83.9)                             | 100 (15.5)                             | 4 (0.6)                                | 0.80 (0.52 - 1.21)                              | 0.2823                                       |
| 57 (8.9)                            | 320 (49.9)                             | 255 (39.8)                             | 66 (10.3)                              | 1.11 (0.87 - 1.41)                              | 0.4013                                       |
| 21 (3.3)                            | 401 (62.5)                             | 217 (33.8)                             | 24 (3.7)                               | 0.70 (0.52 - 0.95)                              | 0.0204                                       |
| 107 (16.7)                          | 220 (34.3)                             | 320 (49.9)                             | 101 (15.8)                             | 1.04 (0.82 - 1.31)                              | 0.7632                                       |
| 150 (23.3)                          | 191 (29.7)                             | 310 (48.2)                             | 142 (22.1)                             | 1.14 (0.92 - 1.40)                              | 0.2381                                       |
| 45 (7.0)                            | 339 (52.7)                             | 263 (40.9)                             | 41 (6.4)                               | 1.13 (0.87 - 1.46)                              | 0.3577                                       |
| 52 (8.1)                            | 328 (51.1)                             | 262 (40.8)                             | 52 (8.1)                               | 1.02 (0.80 - 1.31)                              | 0.8589                                       |
| 8 (1.2)                             | 501 (77.8)                             | 129 (20.0)                             | 14 (2.2)                               | 1.21 (0.86 - 1.71)                              | 0.2793                                       |

|            |            |            |            |                    |        |
|------------|------------|------------|------------|--------------------|--------|
| 11 (1.7)   | 488 (76.0) | 143 (22.3) | 11 (1.7)   | 1.28 (0.91 - 1.81) | 0.1541 |
| 62 (9.7)   | 318 (49.5) | 270 (42.1) | 54 (8.4)   | 1.02 (0.80 - 1.31) | 0.853  |
| 36 (5.6)   | 381 (59.3) | 225 (35.0) | 36 (5.6)   | 1.10 (0.84 - 1.43) | 0.4822 |
| 36 (5.6)   | 370 (57.5) | 236 (36.7) | 37 (5.8)   | 0.92 (0.70 - 1.20) | 0.52   |
| 65 (10.1)  | 327 (50.9) | 253 (39.4) | 62 (9.7)   | 1.07 (0.84 - 1.35) | 0.5901 |
| 123 (19.1) | 217 (33.7) | 322 (50.1) | 104 (16.2) | 1.28 (1.01 - 1.62) | 0.0405 |
| 33 (5.1)   | 385 (59.8) | 229 (35.6) | 30 (4.7)   | 1.01 (0.77 - 1.33) | 0.9388 |
| 18 (2.8)   | 438 (68.0) | 182 (28.3) | 24 (3.7)   | 1.03 (0.76 - 1.39) | 0.8669 |
| 16 (2.5)   | 455 (71.0) | 174 (27.1) | 12 (1.9)   | 1.14 (0.84 - 1.55) | 0.404  |
| 57 (8.9)   | 296 (46.0) | 285 (44.3) | 62 (9.6)   | 0.95 (0.75 - 1.20) | 0.6494 |
| 4 (0.6)    | 526 (81.9) | 113 (17.6) | 3 (0.5)    | 0.83 (0.55 - 1.26) | 0.3755 |
| 53 (8.2)   | 333 (51.8) | 264 (41.1) | 46 (7.2)   | 1.07 (0.84 - 1.37) | 0.5859 |
| 4 (0.6)    | 533 (82.9) | 108 (16.8) | 2 (0.3)    | 0.79 (0.51 - 1.22) | 0.2884 |
| 15 (2.3)   | 473 (73.7) | 160 (24.9) | 9 (1.4)    | 1.15 (0.83 - 1.59) | 0.4061 |
| 55 (8.5)   | 311 (48.3) | 275 (42.7) | 58 (9.0)   | 1.00 (0.77 - 1.29) | 0.9955 |
| 6 (0.9)    | 499 (77.8) | 136 (21.2) | 6 (0.9)    | 0.97 (0.68 - 1.38) | 0.8528 |
| 16 (2.5)   | 434 (67.5) | 193 (30.0) | 16 (2.5)   | 1.05 (0.76 - 1.43) | 0.7796 |
| 7 (1.1)    | 540 (84.1) | 93 (14.5)  | 9 (1.4)    | 1.56 (1.03 - 2.35) | 0.035  |
| 147 (22.9) | 184 (28.6) | 309 (48.1) | 150 (23.3) | 1.00 (0.79 - 1.27) | 0.9851 |
| 80 (12.5)  | 292 (45.6) | 276 (43.1) | 73 (11.4)  | 1.14 (0.90 - 1.44) | 0.2906 |
| 133 (20.7) | 194 (30.2) | 304 (47.4) | 144 (22.4) | 1.04 (0.83 - 1.31) | 0.7183 |
| 26 (4.0)   | 421 (65.4) | 199 (30.9) | 24 (3.7)   | 0.99 (0.74 - 1.31) | 0.9266 |
| 53 (8.2)   | 315 (48.9) | 273 (42.4) | 56 (8.7)   | 0.93 (0.73 - 1.20) | 0.5912 |
| 37 (5.8)   | 352 (54.9) | 247 (38.5) | 42 (6.6)   | 1.00 (0.77 - 1.30) | 0.974  |
| 31 (4.8)   | 403 (62.7) | 214 (33.3) | 26 (4.0)   | 1.24 (0.91 - 1.69) | 0.164  |
| 16 (2.5)   | 482 (75.3) | 144 (22.5) | 14 (2.2)   | 0.99 (0.70 - 1.40) | 0.9558 |
| 20 (3.1)   | 455 (70.7) | 169 (26.2) | 20 (3.1)   | 0.99 (0.73 - 1.34) | 0.9498 |
| 2 (0.3)    | 528 (82.6) | 108 (16.9) | 3 (0.5)    | 0.86 (0.54 - 1.35) | 0.5015 |
| 33 (5.1)   | 383 (59.6) | 222 (34.5) | 38 (5.9)   | 1.03 (0.78 - 1.34) | 0.8489 |
| 67 (10.5)  | 296 (46.2) | 266 (41.5) | 79 (12.3)  | 1.04 (0.82 - 1.33) | 0.7335 |
| 34 (5.3)   | 371 (57.8) | 243 (37.9) | 28 (4.4)   | 1.03 (0.79 - 1.34) | 0.8469 |
| 29 (4.5)   | 410 (63.7) | 209 (32.5) | 25 (3.9)   | 1.00 (0.76 - 1.32) | 0.9999 |
| 3 (0.5)    | 563 (87.8) | 71 (11.1)  | 7 (1.1)    | 0.70 (0.43 - 1.15) | 0.1627 |
| 68 (10.6)  | 287 (44.7) | 292 (45.5) | 63 (9.8)   | 1.12 (0.88 - 1.42) | 0.3442 |
| 3 (0.5)    | 586 (91.0) | 58 (9.0)   | 0 (0.0)    | 1.12 (0.69 - 1.80) | 0.6482 |
| 49 (7.7)   | 361 (56.6) | 233 (36.5) | 44 (6.9)   | 1.22 (0.92 - 1.62) | 0.1609 |
| 2 (0.3)    | 558 (86.8) | 84 (13.1)  | 1 (0.2)    | 0.83 (0.51 - 1.35) | 0.4541 |
| 3 (0.5)    | 573 (89.1) | 70 (10.9)  | 0 (0.0)    | 1.08 (0.69 - 1.69) | 0.7248 |
| 5 (0.8)    | 561 (87.1) | 80 (12.4)  | 3 (0.5)    | 1.31 (0.85 - 2.02) | 0.2217 |
| 3 (0.5)    | 548 (85.4) | 89 (13.9)  | 5 (0.8)    | 1.19 (0.79 - 1.77) | 0.4039 |
| 0 (0.0)    | 557 (86.9) | 83 (12.9)  | 1 (0.2)    | 0.70 (0.43 - 1.11) | 0.131  |
| 10 (1.6)   | 468 (72.8) | 164 (25.5) | 11 (1.7)   | 0.97 (0.71 - 1.33) | 0.8681 |
| 10 (1.6)   | 524 (81.6) | 111 (17.3) | 7 (1.1)    | 1.60 (1.07 - 2.38) | 0.021  |
| 5 (0.8)    | 500 (77.6) | 133 (20.7) | 11 (1.7)   | 0.99 (0.69 - 1.42) | 0.9715 |
| 11 (1.7)   | 480 (74.7) | 146 (22.7) | 17 (2.6)   | 1.10 (0.80 - 1.51) | 0.5486 |
| 12 (1.9)   | 479 (74.5) | 154 (24.0) | 10 (1.6)   | 0.94 (0.66 - 1.34) | 0.7424 |
| 7 (1.1)    | 540 (83.9) | 101 (15.7) | 3 (0.5)    | 1.05 (0.73 - 1.52) | 0.7777 |
| 136 (21.3) | 185 (28.9) | 331 (51.7) | 124 (19.4) | 1.04 (0.83 - 1.31) | 0.7173 |
| 6 (0.9)    | 517 (80.3) | 121 (18.8) | 6 (0.9)    | 0.85 (0.58 - 1.25) | 0.414  |
| 116 (18.0) | 217 (33.7) | 316 (49.1) | 110 (17.1) | 1.08 (0.87 - 1.35) | 0.4878 |
| 5 (0.8)    | 557 (86.5) | 84 (13.0)  | 3 (0.5)    | 1.19 (0.77 - 1.83) | 0.4361 |
| 18 (2.8)   | 471 (73.3) | 161 (25.0) | 11 (1.7)   | 0.98 (0.73 - 1.32) | 0.8788 |
| 114 (17.8) | 217 (33.9) | 318 (49.7) | 105 (16.4) | 1.09 (0.87 - 1.36) | 0.4386 |

|            |            |            |            |                    |        |
|------------|------------|------------|------------|--------------------|--------|
| 4 (0.6)    | 527 (81.8) | 112 (17.4) | 5 (0.8)    | 1.25 (0.86 - 1.82) | 0.2483 |
| 110 (17.1) | 203 (31.6) | 325 (50.5) | 115 (17.9) | 0.85 (0.67 - 1.06) | 0.1556 |
| 46 (7.2)   | 349 (54.4) | 250 (38.9) | 43 (6.7)   | 0.92 (0.71 - 1.18) | 0.5082 |
| 107 (16.6) | 235 (36.5) | 315 (49.0) | 93 (14.5)  | 0.99 (0.79 - 1.24) | 0.9297 |
| 165 (25.7) | 163 (25.3) | 320 (49.8) | 160 (24.9) | 1.03 (0.82 - 1.29) | 0.8119 |
| 69 (10.7)  | 286 (44.4) | 287 (44.6) | 71 (11.0)  | 0.84 (0.66 - 1.06) | 0.1435 |
| 8 (1.2)    | 538 (83.5) | 101 (15.7) | 5 (0.8)    | 1.05 (0.73 - 1.51) | 0.797  |
| 2 (0.3)    | 561 (87.5) | 77 (12.0)  | 3 (0.5)    | 0.67 (0.40 - 1.12) | 0.1242 |
| 3 (0.5)    | 532 (83.4) | 102 (16.0) | 4 (0.6)    | 0.61 (0.38 - 0.96) | 0.032  |
| 3 (0.5)    | 564 (87.7) | 76 (11.8)  | 3 (0.5)    | 0.61 (0.36 - 1.03) | 0.065  |
| 54 (8.4)   | 326 (50.6) | 267 (41.5) | 51 (7.9)   | 0.87 (0.68 - 1.12) | 0.2794 |
| 37 (5.8)   | 339 (52.7) | 266 (41.4) | 38 (5.9)   | 1.03 (0.78 - 1.35) | 0.8341 |
| 2 (0.3)    | 552 (86.0) | 86 (13.4)  | 4 (0.6)    | 1.05 (0.66 - 1.67) | 0.8234 |
| 40 (6.2)   | 375 (58.3) | 235 (36.5) | 33 (5.1)   | 1.02 (0.78 - 1.34) | 0.902  |
| 1 (0.2)    | 590 (91.9) | 50 (7.8)   | 2 (0.3)    | 0.61 (0.34 - 1.10) | 0.0983 |
| 80 (12.4)  | 262 (40.7) | 306 (47.6) | 75 (11.7)  | 1.11 (0.87 - 1.41) | 0.4127 |
| 5 (0.8)    | 537 (83.5) | 103 (16.0) | 3 (0.5)    | 1.24 (0.80 - 1.94) | 0.3341 |
| 4 (0.6)    | 537 (83.6) | 99 (15.4)  | 6 (0.9)    | 1.32 (0.90 - 1.93) | 0.1569 |
| 144 (22.4) | 165 (25.7) | 348 (54.1) | 130 (20.2) | 1.07 (0.84 - 1.37) | 0.583  |
| 21 (3.3)   | 494 (76.8) | 134 (20.8) | 15 (2.3)   | 1.54 (1.11 - 2.15) | 0.0107 |
| 29 (4.5)   | 439 (68.5) | 172 (26.8) | 30 (4.7)   | 1.11 (0.83 - 1.49) | 0.4899 |
| 42 (6.5)   | 421 (65.4) | 191 (29.7) | 32 (5.0)   | 1.48 (1.10 - 2.00) | 0.0096 |
| 52 (8.1)   | 317 (49.4) | 273 (42.5) | 52 (8.1)   | 0.87 (0.67 - 1.13) | 0.2919 |
| 51 (7.9)   | 338 (52.6) | 265 (41.3) | 39 (6.1)   | 1.10 (0.84 - 1.44) | 0.4805 |
| 88 (13.7)  | 251 (39.0) | 309 (48.1) | 83 (12.9)  | 1.09 (0.85 - 1.38) | 0.5018 |
| 2 (0.3)    | 583 (90.5) | 60 (9.3)   | 1 (0.2)    | 1.18 (0.68 - 2.06) | 0.552  |
| 116 (18.0) | 246 (38.3) | 293 (45.6) | 104 (16.2) | 1.22 (0.95 - 1.56) | 0.1199 |
| 45 (7.0)   | 332 (51.6) | 264 (41.0) | 48 (7.5)   | 0.83 (0.65 - 1.06) | 0.1314 |
| 29 (4.5)   | 388 (60.4) | 224 (34.9) | 30 (4.7)   | 1.15 (0.86 - 1.53) | 0.3378 |
| 20 (3.1)   | 495 (77.0) | 133 (20.7) | 15 (2.3)   | 1.58 (1.12 - 2.22) | 0.0085 |
| 34 (5.3)   | 423 (65.8) | 188 (29.2) | 32 (5.0)   | 1.29 (0.97 - 1.71) | 0.0777 |
| 27 (4.2)   | 456 (71.0) | 166 (25.9) | 20 (3.1)   | 1.60 (1.18 - 2.18) | 0.0026 |
| 15 (2.4)   | 506 (79.3) | 120 (18.8) | 12 (1.9)   | 1.57 (1.10 - 2.26) | 0.0133 |
| 19 (3.0)   | 501 (77.9) | 127 (19.8) | 15 (2.3)   | 1.57 (1.11 - 2.21) | 0.0111 |
| 2 (0.3)    | 595 (92.5) | 47 (7.3)   | 1 (0.2)    | 1.36 (0.76 - 2.41) | 0.3001 |
| 2 (0.3)    | 547 (85.2) | 88 (13.7)  | 7 (1.1)    | 0.70 (0.44 - 1.09) | 0.1167 |

| PD susceptibility:<br>Dominant Model<br>OR (95%CI) | CS | PD susceptibility:<br>CS<br>Dominant<br>value | P-                 | PD susceptibility:<br>Recessive Model<br>OR (95%CI) | CS | PD susceptibility:<br>CS<br>Recessive<br>P-value | Age<Q1<br>Genotype n(%)<br>1/1<br>Cases | Age<Q1<br>Genotype n(%)<br>1/2<br>Cases |
|----------------------------------------------------|----|-----------------------------------------------|--------------------|-----------------------------------------------------|----|--------------------------------------------------|-----------------------------------------|-----------------------------------------|
| 0.96 (0.69 - 1.33)                                 |    | 0.7946                                        |                    | 1.04 (0.69 - 1.55)                                  |    | 0.8642                                           | 118 (43.5)                              | 109 (40.2)                              |
| 0.74 (0.53 - 1.03)                                 |    | 0.0723                                        |                    | 1.09 (0.75 - 1.59)                                  |    | 0.6465                                           | 77 (28.2)                               | 134 (49.1)                              |
| 0.80 (0.51 - 1.25)                                 |    | 0.3202                                        |                    | 0.70 (0.19 - 2.58)                                  |    | 0.5928                                           | 228 (83.5)                              | 45 (16.5)                               |
| 1.61 (0.90 - 2.88)                                 |    | 0.1064                                        |                    | 0.00 (0.00 - )                                      |    | 0.9854                                           | 249 (91.5)                              | 23 (8.5)                                |
| 0.83 (0.60 - 1.16)                                 |    | 0.2779                                        |                    | 0.77 (0.53 - 1.12)                                  |    | 0.1706                                           | 64 (23.4)                               | 134 (49.1)                              |
| 1.18 (0.84 - 1.64)                                 |    | 0.3392                                        |                    | 1.30 (0.89 - 1.91)                                  |    | 0.1808                                           | 97 (35.7)                               | 142 (52.2)                              |
| 1.23 (0.86 - 1.76)                                 |    | 0.2645                                        |                    | 1.16 (0.82 - 1.65)                                  |    | 0.4088                                           | 88 (32.2)                               | 140 (51.3)                              |
| 0.85 (0.59 - 1.22)                                 |    | 0.3733                                        |                    | 0.73 (0.26 - 2.02)                                  |    | 0.54                                             | 213 (78.0)                              | 55 (20.1)                               |
| 0.73 (0.52 - 1.02)                                 |    | 0.0616                                        |                    | 1.16 (0.80 - 1.70)                                  |    | 0.4267                                           | 79 (29.0)                               | 134 (49.3)                              |
| 1.23 (0.86 - 1.76)                                 |    | 0.2646                                        |                    | 1.18 (0.83 - 1.68)                                  |    | 0.3601                                           | 88 (32.2)                               | 140 (51.3)                              |
| 0.90 (0.51 - 1.58)                                 |    | 0.7115                                        | 383393.5 (0.00 - ) |                                                     |    | 0.9797                                           | 236 (86.8)                              | 34 (12.5)                               |
| 1.50 (1.02 - 2.20)                                 |    | 0.0403                                        |                    | 0.64 (0.24 - 1.65)                                  |    | 0.3535                                           | 213 (78.0)                              | 56 (20.5)                               |
| 1.28 (0.85 - 1.91)                                 |    | 0.2352                                        |                    | 0.74 (0.09 - 5.86)                                  |    | 0.7728                                           | 226 (82.8)                              | 45 (16.5)                               |
| 0.97 (0.72 - 1.32)                                 |    | 0.8551                                        |                    | 1.79 (0.93 - 3.48)                                  |    | 0.0836                                           | 141 (52.0)                              | 107 (39.5)                              |
| 1.02 (0.65 - 1.59)                                 |    | 0.9362                                        |                    | 2.03 (0.32 - 12.92)                                 |    | 0.4516                                           | 234 (86.0)                              | 36 (13.2)                               |
| 1.11 (0.77 - 1.61)                                 |    | 0.5765                                        |                    | 0.57 (0.16 - 1.98)                                  |    | 0.3751                                           | 211 (77.3)                              | 57 (20.9)                               |
| 0.83 (0.58 - 1.18)                                 |    | 0.3009                                        |                    | 2.98 (1.23 - 7.23)                                  |    | 0.0158                                           | 199 (73.2)                              | 65 (23.9)                               |
| 1.09 (0.80 - 1.47)                                 |    | 0.5823                                        |                    | 1.46 (0.81 - 2.64)                                  |    | 0.2097                                           | 154 (56.8)                              | 97 (35.8)                               |
| 1.17 (0.85 - 1.61)                                 |    | 0.3461                                        |                    | 1.15 (0.45 - 2.94)                                  |    | 0.7674                                           | 182 (66.7)                              | 79 (28.9)                               |
| 1.13 (0.81 - 1.58)                                 |    | 0.4812                                        |                    | 1.04 (0.73 - 1.47)                                  |    | 0.8321                                           | 90 (33.1)                               | 118 (43.4)                              |
| 1.30 (0.79 - 2.15)                                 |    | 0.3049                                        | 1491899 (0.00 - )  |                                                     |    | 0.9837                                           | 240 (88.2)                              | 30 (11.0)                               |
| 0.84 (0.60 - 1.18)                                 |    | 0.3165                                        |                    | 1.01 (0.70 - 1.44)                                  |    | 0.9638                                           | 68 (25.1)                               | 132 (48.7)                              |
| 0.50 (0.33 - 0.76)                                 |    | 0.0012                                        |                    | 1.84 (0.50 - 6.70)                                  |    | 0.3559                                           | 227 (83.2)                              | 40 (14.7)                               |
| 0.78 (0.56 - 1.07)                                 |    | 0.1244                                        |                    | 0.82 (0.54 - 1.23)                                  |    | 0.3368                                           | 82 (30.0)                               | 134 (49.1)                              |
| 1.10 (0.79 - 1.54)                                 |    | 0.5641                                        |                    | 1.02 (0.58 - 1.80)                                  |    | 0.9461                                           | 161 (59.2)                              | 100 (36.8)                              |
| 1.07 (0.75 - 1.51)                                 |    | 0.7203                                        |                    | 0.79 (0.31 - 2.02)                                  |    | 0.624                                            | 183 (67.3)                              | 83 (30.5)                               |
| 1.20 (0.88 - 1.63)                                 |    | 0.2493                                        |                    | 1.59 (0.96 - 2.64)                                  |    | 0.0745                                           | 129 (47.3)                              | 119 (43.6)                              |
| 1.03 (0.75 - 1.41)                                 |    | 0.8439                                        |                    | 1.17 (0.59 - 2.29)                                  |    | 0.6551                                           | 160 (58.8)                              | 91 (33.5)                               |
| 0.71 (0.53 - 0.96)                                 |    | 0.0279                                        |                    | 0.93 (0.53 - 1.62)                                  |    | 0.8017                                           | 150 (54.9)                              | 98 (35.9)                               |
| 0.83 (0.60 - 1.16)                                 |    | 0.2845                                        |                    | 0.81 (0.56 - 1.16)                                  |    | 0.2458                                           | 59 (21.7)                               | 136 (50.0)                              |
| 1.04 (0.76 - 1.41)                                 |    | 0.816                                         |                    | 1.07 (0.69 - 1.66)                                  |    | 0.7612                                           | 89 (32.6)                               | 139 (50.9)                              |
| 1.29 (0.93 - 1.79)                                 |    | 0.1335                                        |                    | 1.04 (0.43 - 2.51)                                  |    | 0.933                                            | 177 (64.8)                              | 84 (30.8)                               |
| 0.71 (0.52 - 0.97)                                 |    | 0.0334                                        |                    | 1.14 (0.71 - 1.83)                                  |    | 0.5853                                           | 109 (39.9)                              | 127 (46.5)                              |
| 0.58 (0.40 - 0.84)                                 |    | 0.0037                                        |                    | 1.22 (0.49 - 3.04)                                  |    | 0.674                                            | 192 (70.8)                              | 69 (25.5)                               |
| 0.93 (0.67 - 1.28)                                 |    | 0.658                                         |                    | 1.41 (0.67 - 2.95)                                  |    | 0.3619                                           | 180 (66.4)                              | 76 (28.0)                               |
| 0.94 (0.53 - 1.68)                                 |    | 0.8404                                        |                    | 0.54 (0.18 - 1.57)                                  |    | 0.2548                                           | 232 (86.6)                              | 29 (10.8)                               |
| 0.88 (0.60 - 1.30)                                 |    | 0.5154                                        |                    | 1.25 (0.32 - 4.93)                                  |    | 0.7484                                           | 226 (82.8)                              | 45 (16.5)                               |
| 0.96 (0.63 - 1.46)                                 |    | 0.8413                                        |                    | 1.00 (0.37 - 2.75)                                  |    | 0.9954                                           | 229 (84.2)                              | 40 (14.7)                               |
| 1.47 (0.90 - 2.38)                                 |    | 0.1203                                        |                    | 0.15 (0.02 - 1.33)                                  |    | 0.0893                                           | 233 (85.7)                              | 37 (13.6)                               |
| 1.39 (0.74 - 2.60)                                 |    | 0.3064                                        | 471303.1 (0.00 - ) |                                                     |    | 0.9858                                           | 255 (93.4)                              | 18 (6.6)                                |
| 0.82 (0.53 - 1.27)                                 |    | 0.364                                         |                    | 0.41 (0.06 - 2.67)                                  |    | 0.3533                                           | 236 (86.4)                              | 35 (12.8)                               |
| 1.32 (0.97 - 1.79)                                 |    | 0.0815                                        |                    | 0.77 (0.48 - 1.24)                                  |    | 0.2876                                           | 127 (46.7)                              | 126 (46.3)                              |
| 0.69 (0.50 - 0.96)                                 |    | 0.027                                         |                    | 0.70 (0.31 - 1.55)                                  |    | 0.3766                                           | 187 (69.0)                              | 70 (25.8)                               |
| 0.98 (0.72 - 1.34)                                 |    | 0.9068                                        |                    | 1.15 (0.77 - 1.73)                                  |    | 0.4995                                           | 97 (35.7)                               | 136 (50.0)                              |
| 1.17 (0.84 - 1.62)                                 |    | 0.3489                                        |                    | 1.16 (0.83 - 1.62)                                  |    | 0.3699                                           | 79 (28.9)                               | 124 (45.4)                              |
| 1.11 (0.82 - 1.52)                                 |    | 0.4981                                        |                    | 1.22 (0.71 - 2.09)                                  |    | 0.4636                                           | 129 (47.3)                              | 120 (44.0)                              |
| 1.04 (0.77 - 1.39)                                 |    | 0.8028                                        |                    | 0.98 (0.56 - 1.72)                                  |    | 0.9432                                           | 124 (45.6)                              | 122 (44.9)                              |
| 1.41 (0.97 - 2.06)                                 |    | 0.0724                                        |                    | 0.39 (0.13 - 1.18)                                  |    | 0.0955                                           | 194 (71.3)                              | 73 (26.8)                               |

|                    |        |                     |        |            |            |
|--------------------|--------|---------------------|--------|------------|------------|
| 1.28 (0.89 - 1.85) | 0.1899 | 1.51 (0.46 - 4.90)  | 0.4946 | 194 (71.1) | 70 (25.6)  |
| 0.95 (0.70 - 1.29) | 0.7369 | 1.27 (0.76 - 2.12)  | 0.3537 | 117 (43.0) | 127 (46.7) |
| 1.13 (0.83 - 1.53) | 0.4465 | 1.04 (0.56 - 1.92)  | 0.9023 | 158 (57.9) | 96 (35.2)  |
| 0.89 (0.65 - 1.22) | 0.4567 | 0.99 (0.54 - 1.81)  | 0.9771 | 175 (64.1) | 82 (30.0)  |
| 1.08 (0.81 - 1.45) | 0.6113 | 1.07 (0.65 - 1.76)  | 0.7866 | 139 (51.1) | 110 (40.4) |
| 1.24 (0.89 - 1.74) | 0.1973 | 1.41 (0.97 - 2.06)  | 0.0702 | 79 (29.0)  | 132 (48.5) |
| 0.97 (0.70 - 1.35) | 0.8603 | 1.21 (0.62 - 2.36)  | 0.5845 | 168 (61.5) | 84 (30.8)  |
| 1.14 (0.81 - 1.61) | 0.4379 | 0.54 (0.23 - 1.27)  | 0.1556 | 162 (59.3) | 104 (38.1) |
| 1.11 (0.79 - 1.56) | 0.5373 | 1.53 (0.57 - 4.11)  | 0.4001 | 183 (67.3) | 83 (30.5)  |
| 0.96 (0.72 - 1.28) | 0.7857 | 0.87 (0.51 - 1.47)  | 0.6023 | 105 (38.6) | 138 (50.7) |
| 0.82 (0.54 - 1.26) | 0.3654 | 0.99 (0.15 - 6.47)  | 0.9887 | 224 (82.7) | 46 (17.0)  |
| 1.02 (0.77 - 1.37) | 0.8716 | 1.34 (0.74 - 2.44)  | 0.3318 | 129 (47.4) | 118 (43.4) |
| 0.75 (0.48 - 1.18) | 0.2141 | 2.39 (0.22 - 25.73) | 0.4714 | 227 (83.2) | 45 (16.5)  |
| 1.09 (0.76 - 1.55) | 0.6442 | 2.02 (0.68 - 6.04)  | 0.2084 | 190 (69.9) | 75 (27.6)  |
| 1.05 (0.77 - 1.42) | 0.7762 | 0.85 (0.48 - 1.52)  | 0.5876 | 120 (44.0) | 129 (47.3) |
| 0.98 (0.67 - 1.43) | 0.9115 | 0.82 (0.22 - 3.00)  | 0.7644 | 204 (75.6) | 64 (23.7)  |
| 1.07 (0.76 - 1.50) | 0.697  | 0.86 (0.30 - 2.45)  | 0.7847 | 177 (64.8) | 89 (32.6)  |
| 1.66 (1.07 - 2.58) | 0.0247 | 0.98 (0.22 - 4.31)  | 0.976  | 217 (80.1) | 49 (18.1)  |
| 1.06 (0.75 - 1.51) | 0.7343 | 0.93 (0.65 - 1.34)  | 0.7026 | 70 (25.6)  | 138 (50.5) |
| 1.13 (0.83 - 1.53) | 0.4331 | 1.21 (0.78 - 1.90)  | 0.3958 | 121 (44.5) | 118 (43.4) |
| 1.22 (0.87 - 1.72) | 0.2479 | 0.88 (0.61 - 1.27)  | 0.5017 | 81 (29.7)  | 133 (48.7) |
| 0.98 (0.71 - 1.35) | 0.8794 | 1.04 (0.50 - 2.17)  | 0.9138 | 161 (59.0) | 98 (35.9)  |
| 0.92 (0.68 - 1.25) | 0.6096 | 0.93 (0.55 - 1.58)  | 0.801  | 114 (41.8) | 136 (49.8) |
| 1.06 (0.78 - 1.44) | 0.7171 | 0.80 (0.42 - 1.53)  | 0.497  | 130 (47.8) | 125 (46.0) |
| 1.22 (0.87 - 1.73) | 0.2518 | 1.35 (0.68 - 2.72)  | 0.3925 | 152 (55.7) | 104 (38.1) |
| 0.96 (0.66 - 1.41) | 0.8485 | 1.18 (0.45 - 3.10)  | 0.7407 | 203 (74.6) | 63 (23.2)  |
| 0.97 (0.68 - 1.37) | 0.8522 | 1.09 (0.52 - 2.29)  | 0.8106 | 196 (72.1) | 66 (24.3)  |
| 0.87 (0.54 - 1.41) | 0.5713 | 0.57 (0.08 - 3.98)  | 0.5713 | 227 (83.5) | 45 (16.5)  |
| 1.09 (0.80 - 1.49) | 0.5899 | 0.79 (0.40 - 1.56)  | 0.4937 | 139 (50.9) | 121 (44.3) |
| 1.17 (0.85 - 1.60) | 0.332  | 0.83 (0.52 - 1.32)  | 0.4354 | 120 (44.4) | 120 (44.4) |
| 0.96 (0.71 - 1.30) | 0.7903 | 1.43 (0.73 - 2.80)  | 0.2949 | 148 (54.4) | 107 (39.3) |
| 0.94 (0.68 - 1.29) | 0.7069 | 1.35 (0.66 - 2.73)  | 0.409  | 166 (60.8) | 95 (34.8)  |
| 0.76 (0.45 - 1.30) | 0.3189 | 0.19 (0.02 - 1.70)  | 0.1374 | 244 (89.4) | 29 (10.6)  |
| 1.13 (0.84 - 1.52) | 0.4327 | 1.17 (0.73 - 1.88)  | 0.5217 | 121 (44.3) | 127 (46.5) |
| 1.03 (0.63 - 1.70) | 0.8986 | 1273122 (0.00 - )   | 0.984  | 246 (90.4) | 26 (9.6)   |
| 1.24 (0.89 - 1.72) | 0.2031 | 1.22 (0.67 - 2.22)  | 0.5109 | 134 (49.8) | 108 (40.1) |
| 0.81 (0.49 - 1.33) | 0.4032 | 1.59 (0.12 - 20.84) | 0.7221 | 238 (87.5) | 34 (12.5)  |
| 1.00 (0.63 - 1.61) | 0.9879 | 1482089 (0.00 - )   | 0.9837 | 242 (89.6) | 24 (8.9)   |
| 1.32 (0.82 - 2.13) | 0.2502 | 1.57 (0.36 - 6.82)  | 0.5483 | 242 (88.6) | 29 (10.6)  |
| 1.24 (0.81 - 1.90) | 0.3148 | 0.48 (0.05 - 4.92)  | 0.5366 | 227 (83.2) | 45 (16.5)  |
| 0.70 (0.44 - 1.14) | 0.1507 | 0.00 (0.00 - )      | 0.9859 | 242 (89.6) | 27 (10.0)  |
| 0.99 (0.70 - 1.39) | 0.9369 | 0.84 (0.29 - 2.46)  | 0.7485 | 187 (68.5) | 81 (29.7)  |
| 1.55 (1.02 - 2.35) | 0.0393 | 2.44 (0.58 - 10.20) | 0.2214 | 203 (74.6) | 60 (22.1)  |
| 1.12 (0.76 - 1.64) | 0.5763 | 0.22 (0.04 - 1.08)  | 0.0626 | 205 (75.1) | 65 (23.8)  |
| 1.24 (0.87 - 1.75) | 0.2352 | 0.51 (0.20 - 1.33)  | 0.1701 | 187 (68.5) | 80 (29.3)  |
| 0.91 (0.63 - 1.33) | 0.636  | 1.29 (0.38 - 4.35)  | 0.6816 | 195 (71.4) | 71 (26.0)  |
| 0.98 (0.67 - 1.44) | 0.9125 | 3.15 (0.63 - 15.69) | 0.1616 | 224 (82.1) | 48 (17.6)  |
| 0.94 (0.68 - 1.29) | 0.7062 | 1.21 (0.84 - 1.73)  | 0.3134 | 83 (30.4)  | 129 (47.3) |
| 0.85 (0.57 - 1.28) | 0.4456 | 0.79 (0.19 - 3.23)  | 0.7416 | 219 (80.2) | 52 (19.0)  |
| 1.09 (0.80 - 1.48) | 0.594  | 1.10 (0.77 - 1.59)  | 0.5991 | 97 (35.5)  | 126 (46.2) |
| 1.14 (0.73 - 1.81) | 0.5623 | 1.76 (0.41 - 7.55)  | 0.4474 | 229 (83.9) | 43 (15.8)  |
| 0.88 (0.63 - 1.23) | 0.4616 | 1.97 (0.78 - 4.95)  | 0.1505 | 197 (72.2) | 72 (26.4)  |
| 1.06 (0.78 - 1.45) | 0.6981 | 1.17 (0.81 - 1.70)  | 0.4053 | 97 (35.7)  | 125 (46.0) |



|                    |        |                     |        |            |            |
|--------------------|--------|---------------------|--------|------------|------------|
| 1.29 (0.87 - 1.91) | 0.2104 | 0.86 (0.19 - 3.96)  | 0.8452 | 221 (81.0) | 51 (18.7)  |
| 0.79 (0.57 - 1.09) | 0.1434 | 0.89 (0.61 - 1.29)  | 0.5284 | 89 (32.6)  | 128 (46.9) |
| 0.86 (0.63 - 1.19) | 0.3666 | 1.04 (0.61 - 1.75)  | 0.8925 | 144 (52.7) | 110 (40.3) |
| 0.86 (0.63 - 1.19) | 0.3673 | 1.22 (0.82 - 1.83)  | 0.3243 | 105 (38.5) | 125 (45.8) |
| 1.00 (0.71 - 1.42) | 0.9894 | 1.06 (0.76 - 1.48)  | 0.7342 | 78 (28.7)  | 128 (47.1) |
| 0.77 (0.56 - 1.05) | 0.1027 | 0.91 (0.57 - 1.43)  | 0.6763 | 122 (44.7) | 120 (44.0) |
| 0.99 (0.67 - 1.45) | 0.9433 | 2.28 (0.56 - 9.23)  | 0.249  | 224 (82.1) | 47 (17.2)  |
| 0.68 (0.40 - 1.15) | 0.1483 | 0.50 (0.05 - 5.51)  | 0.5701 | 238 (87.2) | 34 (12.5)  |
| 0.60 (0.37 - 0.97) | 0.038  | 0.54 (0.09 - 3.34)  | 0.5115 | 231 (84.9) | 39 (14.3)  |
| 0.59 (0.34 - 1.02) | 0.0592 | 0.81 (0.11 - 5.92)  | 0.8313 | 241 (88.6) | 29 (10.7)  |
| 0.79 (0.58 - 1.09) | 0.1531 | 1.02 (0.62 - 1.66)  | 0.9503 | 140 (51.3) | 110 (40.3) |
| 1.04 (0.76 - 1.43) | 0.8103 | 1.00 (0.56 - 1.79)  | 0.9921 | 151 (55.5) | 103 (37.9) |
| 1.11 (0.68 - 1.82) | 0.665  | 0.57 (0.10 - 3.15)  | 0.5188 | 230 (84.2) | 41 (15.0)  |
| 0.92 (0.67 - 1.27) | 0.6135 | 1.50 (0.80 - 2.83)  | 0.2055 | 159 (58.5) | 93 (34.2)  |
| 0.62 (0.33 - 1.16) | 0.1336 | 0.33 (0.03 - 3.72)  | 0.3669 | 253 (92.7) | 19 (7.0)   |
| 1.07 (0.79 - 1.45) | 0.6715 | 1.23 (0.78 - 1.95)  | 0.3666 | 108 (39.7) | 129 (47.4) |
| 1.20 (0.76 - 1.88) | 0.4363 | 1582602 (0.00 - )   | 0.9852 | 230 (84.2) | 43 (15.8)  |
| 1.41 (0.94 - 2.13) | 0.0978 | 0.75 (0.21 - 2.69)  | 0.6585 | 224 (82.1) | 47 (17.2)  |
| 0.89 (0.63 - 1.27) | 0.5336 | 1.31 (0.91 - 1.89)  | 0.1484 | 77 (28.2)  | 136 (49.8) |
| 1.64 (1.13 - 2.37) | 0.0095 | 1.31 (0.56 - 3.09)  | 0.5326 | 196 (71.8) | 65 (23.8)  |
| 1.22 (0.87 - 1.70) | 0.2493 | 0.75 (0.37 - 1.53)  | 0.4249 | 172 (63.0) | 85 (31.1)  |
| 1.58 (1.10 - 2.26) | 0.0126 | 1.41 (0.76 - 2.61)  | 0.2772 | 173 (63.4) | 82 (30.0)  |
| 0.80 (0.59 - 1.10) | 0.1736 | 1.04 (0.62 - 1.75)  | 0.8778 | 138 (50.7) | 114 (41.9) |
| 0.95 (0.70 - 1.31) | 0.7714 | 1.91 (1.04 - 3.52)  | 0.0373 | 137 (50.4) | 114 (41.9) |
| 1.06 (0.78 - 1.44) | 0.7226 | 1.17 (0.76 - 1.80)  | 0.4749 | 109 (39.9) | 124 (45.4) |
| 1.16 (0.64 - 2.09) | 0.6245 | 2.11 (0.17 - 26.10) | 0.5614 | 250 (91.6) | 21 (7.7)   |
| 1.26 (0.90 - 1.77) | 0.1705 | 1.20 (0.80 - 1.79)  | 0.3723 | 100 (36.6) | 121 (44.3) |
| 0.79 (0.58 - 1.08) | 0.1373 | 0.84 (0.50 - 1.39)  | 0.4938 | 148 (54.2) | 107 (39.2) |
| 1.23 (0.88 - 1.71) | 0.2215 | 0.93 (0.50 - 1.75)  | 0.8245 | 162 (59.3) | 98 (35.9)  |
| 1.69 (1.16 - 2.47) | 0.0066 | 1.24 (0.52 - 2.95)  | 0.6199 | 197 (72.2) | 65 (23.8)  |
| 1.41 (1.02 - 1.96) | 0.0374 | 0.97 (0.50 - 1.89)  | 0.9336 | 170 (62.5) | 85 (31.3)  |
| 1.75 (1.23 - 2.48) | 0.0018 | 1.31 (0.64 - 2.68)  | 0.4625 | 175 (64.1) | 85 (31.1)  |
| 1.73 (1.16 - 2.57) | 0.0066 | 1.02 (0.37 - 2.78)  | 0.9694 | 197 (72.2) | 68 (24.9)  |
| 1.72 (1.17 - 2.54) | 0.006  | 1.12 (0.46 - 2.70)  | 0.8007 | 196 (71.8) | 66 (24.2)  |
| 1.34 (0.73 - 2.45) | 0.3419 | 2.02 (0.17 - 24.28) | 0.5797 | 247 (90.5) | 26 (9.5)   |
| 0.76 (0.48 - 1.22) | 0.2567 | 0.00 (0.00 - )      | 0.9792 | 246 (90.4) | 25 (9.2)   |

| Age<Q1<br>Genotype n(%)<br>2/2<br>Cases | Age<Q1<br>Genotype n(%)<br>1/1<br>Controls | Age<Q1<br>Genotype n(%)<br>1/2<br>Controls | Age<Q1<br>Genotype n(%)<br>2/2<br>Controls | PD susceptibility:<br>Age<Q1<br>Trend Model<br>OR (95%CI) | PD susceptibility:<br>Age<Q1<br>Trend P-value |
|-----------------------------------------|--------------------------------------------|--------------------------------------------|--------------------------------------------|-----------------------------------------------------------|-----------------------------------------------|
| 44 (16.2)                               | 103 (38.0)                                 | 128 (47.2)                                 | 40 (14.8)                                  | 0.80 (0.57 - 1.12)                                        | 0.1904                                        |
| 62 (22.7)                               | 79 (28.9)                                  | 142 (52.0)                                 | 52 (19.0)                                  | 1.15 (0.85 - 1.56)                                        | 0.354                                         |
| 0 (0.0)                                 | 220 (80.6)                                 | 53 (19.4)                                  | 0 (0.0)                                    | 0.73 (0.40 - 1.33)                                        | 0.3043                                        |
| 0 (0.0)                                 | 255 (93.8)                                 | 15 (5.5)                                   | 2 (0.7)                                    | 1.24 (0.56 - 2.75)                                        | 0.5958                                        |
| 75 (27.5)                               | 66 (24.2)                                  | 138 (50.5)                                 | 69 (25.3)                                  | 1.08 (0.79 - 1.48)                                        | 0.6189                                        |
| 33 (12.1)                               | 97 (35.7)                                  | 138 (50.7)                                 | 37 (13.6)                                  | 0.99 (0.73 - 1.33)                                        | 0.9285                                        |
| 45 (16.5)                               | 84 (30.8)                                  | 140 (51.3)                                 | 49 (17.9)                                  | 0.92 (0.68 - 1.25)                                        | 0.6015                                        |
| 5 (1.8)                                 | 205 (75.1)                                 | 63 (23.1)                                  | 5 (1.8)                                    | 0.79 (0.51 - 1.23)                                        | 0.294                                         |
| 59 (21.7)                               | 84 (30.9)                                  | 142 (52.2)                                 | 46 (16.9)                                  | 1.26 (0.92 - 1.73)                                        | 0.1466                                        |
| 45 (16.5)                               | 84 (30.8)                                  | 140 (51.3)                                 | 49 (17.9)                                  | 0.92 (0.68 - 1.25)                                        | 0.6015                                        |
| 2 (0.7)                                 | 241 (88.6)                                 | 29 (10.7)                                  | 2 (0.7)                                    | 1.20 (0.61 - 2.37)                                        | 0.6                                           |
| 4 (1.5)                                 | 222 (81.3)                                 | 47 (17.2)                                  | 4 (1.5)                                    | 1.20 (0.76 - 1.92)                                        | 0.4332                                        |
| 2 (0.7)                                 | 229 (83.9)                                 | 43 (15.8)                                  | 1 (0.4)                                    | 1.26 (0.72 - 2.21)                                        | 0.4218                                        |
| 23 (8.5)                                | 154 (56.8)                                 | 97 (35.8)                                  | 20 (7.4)                                   | 1.28 (0.90 - 1.80)                                        | 0.1663                                        |
| 2 (0.7)                                 | 231 (84.9)                                 | 39 (14.3)                                  | 2 (0.7)                                    | 0.86 (0.47 - 1.57)                                        | 0.6274                                        |
| 5 (1.8)                                 | 209 (76.6)                                 | 56 (20.5)                                  | 8 (2.9)                                    | 0.83 (0.51 - 1.32)                                        | 0.4269                                        |
| 8 (2.9)                                 | 183 (67.3)                                 | 79 (29.0)                                  | 10 (3.7)                                   | 0.59 (0.37 - 0.94)                                        | 0.0251                                        |
| 20 (7.4)                                | 146 (53.9)                                 | 104 (38.4)                                 | 21 (7.7)                                   | 0.82 (0.58 - 1.16)                                        | 0.2606                                        |
| 12 (4.4)                                | 180 (65.9)                                 | 80 (29.3)                                  | 13 (4.8)                                   | 0.91 (0.62 - 1.34)                                        | 0.647                                         |
| 64 (23.5)                               | 72 (26.5)                                  | 138 (50.7)                                 | 62 (22.8)                                  | 0.78 (0.57 - 1.07)                                        | 0.1301                                        |
| 2 (0.7)                                 | 241 (88.6)                                 | 30 (11.0)                                  | 1 (0.4)                                    | 1.10 (0.63 - 1.92)                                        | 0.732                                         |
| 71 (26.2)                               | 67 (24.7)                                  | 133 (49.1)                                 | 71 (26.2)                                  | 1.00 (0.74 - 1.34)                                        | 0.98                                          |
| 6 (2.2)                                 | 221 (81.0)                                 | 48 (17.6)                                  | 4 (1.5)                                    | 0.95 (0.60 - 1.49)                                        | 0.8221                                        |
| 57 (20.9)                               | 81 (29.7)                                  | 135 (49.5)                                 | 57 (20.9)                                  | 0.99 (0.73 - 1.36)                                        | 0.9746                                        |
| 11 (4.0)                                | 168 (61.8)                                 | 94 (34.6)                                  | 10 (3.7)                                   | 1.11 (0.78 - 1.58)                                        | 0.5533                                        |
| 6 (2.2)                                 | 185 (68.0)                                 | 83 (30.5)                                  | 4 (1.5)                                    | 1.08 (0.72 - 1.61)                                        | 0.7011                                        |
| 25 (9.2)                                | 124 (45.4)                                 | 123 (45.1)                                 | 26 (9.5)                                   | 0.90 (0.65 - 1.24)                                        | 0.5071                                        |
| 21 (7.7)                                | 166 (61.0)                                 | 95 (34.9)                                  | 11 (4.0)                                   | 1.24 (0.85 - 1.80)                                        | 0.2603                                        |
| 25 (9.2)                                | 134 (49.1)                                 | 122 (44.7)                                 | 17 (6.2)                                   | 0.92 (0.65 - 1.28)                                        | 0.6078                                        |
| 77 (28.3)                               | 61 (22.4)                                  | 144 (52.9)                                 | 67 (24.6)                                  | 1.14 (0.84 - 1.55)                                        | 0.4122                                        |
| 45 (16.5)                               | 102 (37.4)                                 | 121 (44.3)                                 | 50 (18.3)                                  | 1.08 (0.80 - 1.45)                                        | 0.6275                                        |
| 12 (4.4)                                | 192 (70.3)                                 | 76 (27.8)                                  | 5 (1.8)                                    | 1.66 (1.08 - 2.53)                                        | 0.0203                                        |
| 37 (13.6)                               | 112 (41.0)                                 | 126 (46.2)                                 | 35 (12.8)                                  | 1.11 (0.81 - 1.53)                                        | 0.5158                                        |
| 10 (3.7)                                | 190 (70.1)                                 | 73 (26.9)                                  | 8 (3.0)                                    | 1.00 (0.67 - 1.49)                                        | 0.9995                                        |
| 15 (5.5)                                | 169 (62.4)                                 | 88 (32.5)                                  | 14 (5.2)                                   | 0.75 (0.50 - 1.11)                                        | 0.1493                                        |
| 7 (2.6)                                 | 238 (88.8)                                 | 19 (7.1)                                   | 11 (4.1)                                   | 0.96 (0.55 - 1.67)                                        | 0.8781                                        |
| 2 (0.7)                                 | 222 (81.3)                                 | 49 (17.9)                                  | 2 (0.7)                                    | 0.82 (0.49 - 1.38)                                        | 0.4574                                        |
| 3 (1.1)                                 | 230 (84.6)                                 | 41 (15.1)                                  | 1 (0.4)                                    | 1.13 (0.64 - 1.98)                                        | 0.6791                                        |
| 2 (0.7)                                 | 242 (89.0)                                 | 26 (9.6)                                   | 4 (1.5)                                    | 1.26 (0.73 - 2.18)                                        | 0.4062                                        |
| 0 (0.0)                                 | 251 (91.9)                                 | 22 (8.1)                                   | 0 (0.0)                                    | 0.70 (0.33 - 1.50)                                        | 0.3616                                        |
| 2 (0.7)                                 | 228 (83.5)                                 | 42 (15.4)                                  | 3 (1.1)                                    | 0.64 (0.34 - 1.21)                                        | 0.1682                                        |
| 19 (7.0)                                | 142 (52.2)                                 | 100 (36.8)                                 | 30 (11.0)                                  | 1.04 (0.75 - 1.45)                                        | 0.7997                                        |
| 14 (5.2)                                | 163 (60.1)                                 | 95 (35.1)                                  | 13 (4.8)                                   | 0.66 (0.44 - 0.98)                                        | 0.0396                                        |
| 39 (14.3)                               | 101 (37.1)                                 | 128 (47.1)                                 | 43 (15.8)                                  | 1.01 (0.73 - 1.38)                                        | 0.9661                                        |
| 70 (25.6)                               | 83 (30.4)                                  | 130 (47.6)                                 | 60 (22.0)                                  | 1.08 (0.81 - 1.45)                                        | 0.6079                                        |
| 24 (8.8)                                | 135 (49.5)                                 | 117 (42.9)                                 | 21 (7.7)                                   | 1.11 (0.80 - 1.56)                                        | 0.5283                                        |
| 26 (9.6)                                | 131 (48.2)                                 | 115 (42.3)                                 | 26 (9.6)                                   | 1.08 (0.77 - 1.52)                                        | 0.6592                                        |
| 5 (1.8)                                 | 213 (78.3)                                 | 50 (18.4)                                  | 9 (3.3)                                    | 1.44 (0.90 - 2.30)                                        | 0.1323                                        |

|           |            |            |           |                    |        |
|-----------|------------|------------|-----------|--------------------|--------|
| 9 (3.3)   | 208 (76.2) | 58 (21.2)  | 7 (2.6)   | 1.63 (1.02 - 2.60) | 0.0427 |
| 28 (10.3) | 125 (46.0) | 122 (44.9) | 25 (9.2)  | 1.12 (0.79 - 1.60) | 0.5151 |
| 19 (7.0)  | 170 (62.3) | 86 (31.5)  | 17 (6.2)  | 1.18 (0.83 - 1.69) | 0.3601 |
| 16 (5.9)  | 156 (57.1) | 104 (38.1) | 13 (4.8)  | 0.77 (0.53 - 1.11) | 0.1644 |
| 23 (8.5)  | 135 (49.6) | 112 (41.2) | 25 (9.2)  | 0.91 (0.66 - 1.26) | 0.566  |
| 61 (22.4) | 88 (32.4)  | 143 (52.6) | 41 (15.1) | 1.50 (1.08 - 2.09) | 0.0161 |
| 21 (7.7)  | 152 (55.7) | 112 (41.0) | 9 (3.3)   | 0.91 (0.64 - 1.29) | 0.5873 |
| 7 (2.6)   | 180 (65.9) | 79 (28.9)  | 14 (5.1)  | 1.23 (0.80 - 1.89) | 0.3379 |
| 6 (2.2)   | 182 (66.9) | 81 (29.8)  | 9 (3.3)   | 0.90 (0.59 - 1.37) | 0.6125 |
| 29 (10.7) | 118 (43.4) | 130 (47.8) | 24 (8.8)  | 1.27 (0.90 - 1.80) | 0.1677 |
| 1 (0.4)   | 216 (79.7) | 54 (19.9)  | 1 (0.4)   | 0.74 (0.43 - 1.27) | 0.2752 |
| 25 (9.2)  | 132 (48.5) | 118 (43.4) | 22 (8.1)  | 1.06 (0.75 - 1.49) | 0.7351 |
| 1 (0.4)   | 219 (80.2) | 53 (19.4)  | 1 (0.4)   | 0.70 (0.40 - 1.23) | 0.2188 |
| 7 (2.6)   | 194 (71.3) | 70 (25.7)  | 8 (2.9)   | 1.02 (0.66 - 1.58) | 0.9149 |
| 24 (8.8)  | 133 (48.7) | 113 (41.4) | 27 (9.9)  | 1.15 (0.82 - 1.61) | 0.4184 |
| 2 (0.7)   | 194 (71.9) | 74 (27.4)  | 2 (0.7)   | 0.72 (0.45 - 1.15) | 0.169  |
| 7 (2.6)   | 174 (63.7) | 94 (34.4)  | 5 (1.8)   | 0.95 (0.64 - 1.42) | 0.8036 |
| 5 (1.8)   | 231 (85.2) | 34 (12.5)  | 6 (2.2)   | 1.82 (1.02 - 3.25) | 0.0436 |
| 65 (23.8) | 76 (27.8)  | 133 (48.7) | 64 (23.4) | 1.11 (0.81 - 1.53) | 0.5224 |
| 33 (12.1) | 112 (41.2) | 129 (47.4) | 31 (11.4) | 0.91 (0.66 - 1.26) | 0.5861 |
| 59 (21.6) | 80 (29.3)  | 149 (54.6) | 44 (16.1) | 1.21 (0.88 - 1.66) | 0.2418 |
| 14 (5.1)  | 175 (64.1) | 86 (31.5)  | 12 (4.4)  | 1.27 (0.86 - 1.87) | 0.2327 |
| 23 (8.4)  | 123 (45.1) | 126 (46.2) | 24 (8.8)  | 1.09 (0.77 - 1.53) | 0.6432 |
| 17 (6.3)  | 149 (54.8) | 106 (39.0) | 17 (6.3)  | 1.36 (0.94 - 1.95) | 0.103  |
| 17 (6.2)  | 171 (62.6) | 89 (32.6)  | 13 (4.8)  | 1.67 (1.10 - 2.54) | 0.0159 |
| 6 (2.2)   | 198 (72.8) | 68 (25.0)  | 6 (2.2)   | 0.81 (0.50 - 1.30) | 0.3751 |
| 10 (3.7)  | 197 (72.4) | 67 (24.6)  | 8 (2.9)   | 1.11 (0.71 - 1.74) | 0.6444 |
| 0 (0.0)   | 223 (82.0) | 48 (17.6)  | 1 (0.4)   | 0.76 (0.41 - 1.41) | 0.3878 |
| 13 (4.8)  | 164 (60.1) | 94 (34.4)  | 15 (5.5)  | 1.44 (0.99 - 2.10) | 0.0551 |
| 30 (11.1) | 122 (45.2) | 125 (46.3) | 23 (8.5)  | 1.12 (0.82 - 1.55) | 0.4711 |
| 17 (6.3)  | 146 (53.7) | 113 (41.5) | 13 (4.8)  | 1.00 (0.71 - 1.42) | 0.9901 |
| 12 (4.4)  | 163 (59.7) | 101 (37.0) | 9 (3.3)   | 0.94 (0.64 - 1.37) | 0.7326 |
| 0 (0.0)   | 237 (86.8) | 34 (12.5)  | 2 (0.7)   | 0.61 (0.31 - 1.17) | 0.1362 |
| 25 (9.2)  | 138 (50.5) | 110 (40.3) | 25 (9.2)  | 1.25 (0.90 - 1.72) | 0.1822 |
| 0 (0.0)   | 241 (88.6) | 31 (11.4)  | 0 (0.0)   | 0.80 (0.44 - 1.46) | 0.4652 |
| 27 (10.0) | 146 (54.3) | 101 (37.5) | 22 (8.2)  | 1.37 (0.94 - 1.98) | 0.097  |
| 0 (0.0)   | 234 (86.0) | 38 (14.0)  | 0 (0.0)   | 0.76 (0.39 - 1.49) | 0.4292 |
| 4 (1.5)   | 242 (89.6) | 28 (10.4)  | 0 (0.0)   | 1.11 (0.64 - 1.94) | 0.7078 |
| 2 (0.7)   | 242 (88.6) | 31 (11.4)  | 0 (0.0)   | 1.14 (0.61 - 2.13) | 0.6778 |
| 1 (0.4)   | 229 (83.9) | 44 (16.1)  | 0 (0.0)   | 1.11 (0.65 - 1.90) | 0.7018 |
| 1 (0.4)   | 237 (87.8) | 32 (11.9)  | 1 (0.4)   | 0.84 (0.44 - 1.61) | 0.605  |
| 5 (1.8)   | 196 (71.8) | 72 (26.4)  | 5 (1.8)   | 1.16 (0.77 - 1.74) | 0.4916 |
| 9 (3.3)   | 224 (82.4) | 43 (15.8)  | 5 (1.8)   | 2.71 (1.52 - 4.82) | 0.0007 |
| 3 (1.1)   | 214 (78.4) | 53 (19.4)  | 6 (2.2)   | 1.11 (0.70 - 1.77) | 0.6557 |
| 6 (2.2)   | 204 (74.7) | 58 (21.2)  | 11 (4.0)  | 1.31 (0.85 - 2.02) | 0.2219 |
| 7 (2.6)   | 206 (75.5) | 62 (22.7)  | 5 (1.8)   | 1.38 (0.88 - 2.16) | 0.1643 |
| 1 (0.4)   | 233 (85.3) | 39 (14.3)  | 1 (0.4)   | 1.33 (0.78 - 2.28) | 0.2905 |
| 61 (22.3) | 86 (31.5)  | 143 (52.4) | 44 (16.1) | 1.23 (0.92 - 1.65) | 0.1653 |
| 2 (0.7)   | 221 (81.0) | 49 (17.9)  | 3 (1.1)   | 0.98 (0.56 - 1.74) | 0.9533 |
| 50 (18.3) | 81 (29.7)  | 138 (50.5) | 54 (19.8) | 0.83 (0.62 - 1.11) | 0.2087 |
| 1 (0.4)   | 234 (85.7) | 38 (13.9)  | 1 (0.4)   | 1.20 (0.67 - 2.16) | 0.5354 |
| 4 (1.5)   | 200 (73.3) | 68 (24.9)  | 5 (1.8)   | 1.06 (0.69 - 1.63) | 0.8033 |
| 50 (18.4) | 79 (29.0)  | 139 (51.1) | 54 (19.9) | 0.81 (0.61 - 1.08) | 0.1567 |

|           |            |            |           |                    |        |
|-----------|------------|------------|-----------|--------------------|--------|
| 1 (0.4)   | 225 (82.4) | 47 (17.2)  | 1 (0.4)   | 1.13 (0.65 - 1.99) | 0.6642 |
| 56 (20.5) | 96 (35.2)  | 134 (49.1) | 43 (15.8) | 1.24 (0.92 - 1.67) | 0.1548 |
| 19 (7.0)  | 156 (57.1) | 99 (36.3)  | 18 (6.6)  | 1.22 (0.86 - 1.71) | 0.2615 |
| 43 (15.8) | 112 (41.0) | 126 (46.2) | 35 (12.8) | 1.17 (0.86 - 1.59) | 0.309  |
| 66 (24.3) | 59 (21.7)  | 136 (50.0) | 77 (28.3) | 0.74 (0.55 - 1.00) | 0.05   |
| 31 (11.4) | 135 (49.5) | 109 (39.9) | 29 (10.6) | 1.16 (0.86 - 1.58) | 0.3327 |
| 2 (0.7)   | 231 (84.6) | 39 (14.3)  | 3 (1.1)   | 1.21 (0.72 - 2.03) | 0.4702 |
| 1 (0.4)   | 245 (89.7) | 27 (9.9)   | 1 (0.4)   | 1.37 (0.65 - 2.88) | 0.4129 |
| 2 (0.7)   | 234 (86.0) | 36 (13.2)  | 2 (0.7)   | 1.12 (0.58 - 2.15) | 0.7428 |
| 2 (0.7)   | 243 (89.3) | 27 (9.9)   | 2 (0.7)   | 1.09 (0.53 - 2.24) | 0.8131 |
| 23 (8.4)  | 151 (55.3) | 101 (37.0) | 21 (7.7)  | 1.16 (0.85 - 1.59) | 0.3561 |
| 18 (6.6)  | 131 (48.2) | 119 (43.8) | 22 (8.1)  | 0.67 (0.46 - 0.96) | 0.0305 |
| 2 (0.7)   | 229 (83.9) | 44 (16.1)  | 0 (0.0)   | 0.94 (0.51 - 1.74) | 0.8436 |
| 20 (7.4)  | 159 (58.5) | 103 (37.9) | 10 (3.7)  | 1.14 (0.78 - 1.66) | 0.4931 |
| 1 (0.4)   | 247 (90.5) | 25 (9.2)   | 1 (0.4)   | 0.57 (0.24 - 1.31) | 0.1855 |
| 35 (12.9) | 121 (44.5) | 117 (43.0) | 34 (12.5) | 1.14 (0.84 - 1.56) | 0.3975 |
| 0 (0.0)   | 230 (84.2) | 43 (15.8)  | 0 (0.0)   | 1.03 (0.58 - 1.83) | 0.9246 |
| 2 (0.7)   | 226 (82.8) | 42 (15.4)  | 5 (1.8)   | 0.94 (0.56 - 1.58) | 0.8136 |
| 60 (22.0) | 60 (22.0)  | 159 (58.2) | 54 (19.8) | 0.87 (0.61 - 1.23) | 0.425  |
| 12 (4.4)  | 213 (78.0) | 53 (19.4)  | 7 (2.6)   | 1.56 (1.01 - 2.42) | 0.046  |
| 16 (5.9)  | 187 (68.5) | 69 (25.3)  | 17 (6.2)  | 1.29 (0.86 - 1.93) | 0.2224 |
| 18 (6.6)  | 179 (65.6) | 82 (30.0)  | 12 (4.4)  | 1.18 (0.80 - 1.75) | 0.4014 |
| 20 (7.4)  | 139 (51.1) | 110 (40.4) | 23 (8.5)  | 1.01 (0.70 - 1.46) | 0.9505 |
| 21 (7.7)  | 143 (52.6) | 113 (41.5) | 16 (5.9)  | 1.15 (0.81 - 1.64) | 0.4392 |
| 40 (14.7) | 98 (35.9)  | 136 (49.8) | 39 (14.3) | 0.89 (0.63 - 1.24) | 0.4792 |
| 2 (0.7)   | 243 (89.0) | 29 (10.6)  | 1 (0.4)   | 0.64 (0.32 - 1.30) | 0.2167 |
| 52 (19.0) | 111 (40.7) | 117 (42.9) | 45 (16.5) | 1.23 (0.90 - 1.69) | 0.1949 |
| 18 (6.6)  | 144 (52.7) | 108 (39.6) | 21 (7.7)  | 0.93 (0.67 - 1.28) | 0.6469 |
| 13 (4.8)  | 157 (57.5) | 100 (36.6) | 16 (5.9)  | 0.85 (0.58 - 1.23) | 0.3829 |
| 11 (4.0)  | 213 (78.0) | 53 (19.4)  | 7 (2.6)   | 1.51 (0.97 - 2.37) | 0.0682 |
| 17 (6.3)  | 181 (66.5) | 73 (26.8)  | 18 (6.6)  | 1.16 (0.80 - 1.67) | 0.4321 |
| 13 (4.8)  | 199 (72.9) | 66 (24.2)  | 8 (2.9)   | 1.64 (1.09 - 2.47) | 0.0174 |
| 8 (2.9)   | 221 (81.0) | 48 (17.6)  | 4 (1.5)   | 2.10 (1.26 - 3.50) | 0.0042 |
| 11 (4.0)  | 216 (79.1) | 52 (19.0)  | 5 (1.8)   | 1.80 (1.12 - 2.89) | 0.016  |
| 0 (0.0)   | 253 (92.7) | 20 (7.3)   | 0 (0.0)   | 1.38 (0.65 - 2.91) | 0.3966 |
| 1 (0.4)   | 232 (85.3) | 38 (14.0)  | 2 (0.7)   | 0.61 (0.34 - 1.09) | 0.097  |

| PD susceptibility:<br>Age<Q1<br>Dominant Model<br>OR (95%CI) | PD susceptibility:<br>Age<Q1<br>Dominant<br>P-value | PD susceptibility:<br>Age<Q1<br>Recessive Model<br>OR (95%CI) | PD susceptibility:<br>Age<Q1<br>Recessive<br>P-value | Age<Q2<br>Genotype n(%)<br>1/1<br>Cases | Age<Q2<br>Genotype n(%)<br>1/2<br>Cases |
|--------------------------------------------------------------|-----------------------------------------------------|---------------------------------------------------------------|------------------------------------------------------|-----------------------------------------|-----------------------------------------|
| 0.67 (0.43 - 1.04)                                           | 0.0734                                              | 1.04 (0.57 - 1.91)                                            | 0.888                                                | 216 (39.9)                              | 239 (44.1)                              |
| 1.01 (0.64 - 1.60)                                           | 0.954                                               | 1.47 (0.88 - 2.44)                                            | 0.139                                                | 181 (33.2)                              | 260 (47.6)                              |
| 0.73 (0.40 - 1.33)                                           | 0.3043                                              | ( - )                                                         | --                                                   | 455 (83.2)                              | 90 (16.5)                               |
| 1.55 (0.64 - 3.76)                                           | 0.3322                                              | 0.00 (0.00 - )                                                | 0.9869                                               | 503 (92.1)                              | 43 (7.9)                                |
| 1.04 (0.65 - 1.64)                                           | 0.8813                                              | 1.19 (0.71 - 1.98)                                            | 0.5133                                               | 147 (26.9)                              | 271 (49.6)                              |
| 1.02 (0.67 - 1.57)                                           | 0.9103                                              | 0.91 (0.52 - 1.60)                                            | 0.753                                                | 194 (35.5)                              | 266 (48.7)                              |
| 0.88 (0.55 - 1.40)                                           | 0.5878                                              | 0.93 (0.56 - 1.53)                                            | 0.7783                                               | 167 (30.5)                              | 270 (49.4)                              |
| 0.78 (0.47 - 1.27)                                           | 0.308                                               | 0.72 (0.17 - 3.08)                                            | 0.6609                                               | 415 (75.9)                              | 122 (22.3)                              |
| 1.14 (0.71 - 1.83)                                           | 0.5765                                              | 1.58 (0.94 - 2.65)                                            | 0.0813                                               | 186 (34.2)                              | 260 (47.8)                              |
| 0.88 (0.55 - 1.40)                                           | 0.5878                                              | 0.93 (0.56 - 1.53)                                            | 0.7783                                               | 167 (30.5)                              | 270 (49.4)                              |
| 1.24 (0.60 - 2.56)                                           | 0.5644                                              | 0.91 (0.06 - 14.54)                                           | 0.9447                                               | 485 (89.0)                              | 57 (10.5)                               |
| 1.27 (0.76 - 2.13)                                           | 0.3667                                              | 0.94 (0.22 - 3.89)                                            | 0.9266                                               | 420 (76.9)                              | 120 (22.0)                              |
| 1.22 (0.69 - 2.18)                                           | 0.4937                                              | 1442436 (0.00 - )                                             | 0.9907                                               | 447 (81.9)                              | 97 (17.8)                               |
| 1.31 (0.86 - 1.98)                                           | 0.2082                                              | 1.36 (0.62 - 2.98)                                            | 0.4377                                               | 311 (57.2)                              | 198 (36.4)                              |
| 0.84 (0.45 - 1.54)                                           | 0.5713                                              | 1.61 (0.09 - 27.57)                                           | 0.7408                                               | 455 (83.3)                              | 85 (15.6)                               |
| 0.88 (0.53 - 1.45)                                           | 0.617                                               | 0.25 (0.03 - 2.42)                                            | 0.2313                                               | 416 (76.1)                              | 120 (21.9)                              |
| 0.58 (0.36 - 0.94)                                           | 0.0273                                              | 0.65 (0.15 - 2.88)                                            | 0.5724                                               | 369 (67.7)                              | 158 (29.0)                              |
| 0.78 (0.52 - 1.18)                                           | 0.2451                                              | 0.87 (0.39 - 1.90)                                            | 0.7213                                               | 295 (54.2)                              | 209 (38.4)                              |
| 0.90 (0.58 - 1.41)                                           | 0.6548                                              | 0.90 (0.30 - 2.72)                                            | 0.8465                                               | 353 (64.7)                              | 172 (31.5)                              |
| 0.61 (0.38 - 0.97)                                           | 0.0374                                              | 0.97 (0.60 - 1.56)                                            | 0.8906                                               | 154 (28.2)                              | 262 (48.0)                              |
| 1.08 (0.58 - 1.98)                                           | 0.8114                                              | 1.87 (0.17 - 20.68)                                           | 0.6099                                               | 478 (87.7)                              | 64 (11.7)                               |
| 0.94 (0.59 - 1.50)                                           | 0.7933                                              | 1.06 (0.66 - 1.70)                                            | 0.8223                                               | 134 (24.7)                              | 269 (49.5)                              |
| 0.86 (0.51 - 1.44)                                           | 0.566                                               | 1.65 (0.46 - 5.96)                                            | 0.4443                                               | 450 (82.3)                              | 87 (15.9)                               |
| 0.99 (0.64 - 1.53)                                           | 0.9548                                              | 1.00 (0.57 - 1.77)                                            | 0.988                                                | 178 (32.5)                              | 267 (48.8)                              |
| 1.12 (0.73 - 1.72)                                           | 0.6019                                              | 1.21 (0.50 - 2.91)                                            | 0.6741                                               | 314 (57.7)                              | 204 (37.5)                              |
| 1.04 (0.68 - 1.61)                                           | 0.8525                                              | 2.06 (0.38 - 11.26)                                           | 0.4058                                               | 364 (66.8)                              | 168 (30.8)                              |
| 0.85 (0.56 - 1.30)                                           | 0.4504                                              | 0.94 (0.48 - 1.86)                                            | 0.8635                                               | 246 (45.1)                              | 243 (44.5)                              |
| 1.04 (0.67 - 1.61)                                           | 0.849                                               | 2.98 (1.12 - 7.92)                                            | 0.0289                                               | 335 (61.5)                              | 179 (32.8)                              |
| 0.72 (0.47 - 1.09)                                           | 0.1218                                              | 1.95 (0.88 - 4.34)                                            | 0.0993                                               | 308 (56.3)                              | 194 (35.5)                              |
| 1.04 (0.66 - 1.65)                                           | 0.8699                                              | 1.35 (0.81 - 2.25)                                            | 0.243                                                | 138 (25.3)                              | 271 (49.6)                              |
| 1.22 (0.81 - 1.83)                                           | 0.3467                                              | 0.89 (0.50 - 1.59)                                            | 0.6915                                               | 195 (35.6)                              | 265 (48.4)                              |
| 1.52 (0.95 - 2.43)                                           | 0.0779                                              | 3.59 (0.98 - 13.16)                                           | 0.0533                                               | 363 (66.5)                              | 170 (31.1)                              |
| 1.12 (0.73 - 1.73)                                           | 0.6019                                              | 1.17 (0.63 - 2.17)                                            | 0.6116                                               | 245 (44.9)                              | 240 (44.0)                              |
| 0.94 (0.59 - 1.48)                                           | 0.7775                                              | 1.42 (0.49 - 4.15)                                            | 0.5186                                               | 392 (72.2)                              | 133 (24.5)                              |
| 0.69 (0.44 - 1.09)                                           | 0.1149                                              | 0.90 (0.31 - 2.63)                                            | 0.8539                                               | 348 (63.9)                              | 171 (31.4)                              |
| 1.33 (0.63 - 2.80)                                           | 0.4501                                              | 0.32 (0.08 - 1.30)                                            | 0.1105                                               | 479 (89.0)                              | 49 (9.1)                                |
| 0.81 (0.47 - 1.39)                                           | 0.4467                                              | 0.94 (0.06 - 15.00)                                           | 0.9624                                               | 443 (81.0)                              | 97 (17.7)                               |
| 1.03 (0.56 - 1.88)                                           | 0.9213                                              | 3.46 (0.35 - 33.97)                                           | 0.287                                                | 462 (84.8)                              | 75 (13.8)                               |
| 1.46 (0.79 - 2.70)                                           | 0.2252                                              | 0.34 (0.03 - 3.34)                                            | 0.3556                                               | 468 (86.0)                              | 71 (13.1)                               |
| 0.70 (0.33 - 1.50)                                           | 0.3616                                              | ( - )                                                         | --                                                   | 513 (93.8)                              | 34 (6.2)                                |
| 0.65 (0.34 - 1.27)                                           | 0.2094                                              | 0.39 (0.03 - 4.52)                                            | 0.4548                                               | 468 (85.6)                              | 75 (13.7)                               |
| 1.33 (0.88 - 2.02)                                           | 0.1756                                              | 0.49 (0.22 - 1.06)                                            | 0.071                                                | 254 (46.6)                              | 240 (44.0)                              |
| 0.55 (0.35 - 0.87)                                           | 0.0115                                              | 1.22 (0.43 - 3.42)                                            | 0.7115                                               | 369 (67.7)                              | 154 (28.3)                              |
| 1.12 (0.72 - 1.72)                                           | 0.6227                                              | 0.83 (0.45 - 1.52)                                            | 0.546                                                | 188 (34.4)                              | 266 (48.7)                              |
| 1.01 (0.65 - 1.58)                                           | 0.9678                                              | 1.22 (0.75 - 1.99)                                            | 0.4193                                               | 167 (30.5)                              | 251 (45.9)                              |
| 1.07 (0.71 - 1.63)                                           | 0.7453                                              | 1.30 (0.66 - 2.57)                                            | 0.4531                                               | 267 (48.8)                              | 231 (42.2)                              |
| 1.15 (0.75 - 1.77)                                           | 0.524                                               | 0.95 (0.47 - 1.93)                                            | 0.8947                                               | 262 (48.1)                              | 232 (42.6)                              |
| 1.81 (1.06 - 3.11)                                           | 0.0311                                              | 0.43 (0.10 - 1.74)                                            | 0.2353                                               | 397 (72.8)                              | 136 (25.0)                              |

|                    |        |                     |        |            |            |
|--------------------|--------|---------------------|--------|------------|------------|
| 1.61 (0.95 - 2.72) | 0.0753 | 2.29 (0.61 - 8.58)  | 0.218  | 394 (72.2) | 137 (25.1) |
| 1.17 (0.75 - 1.82) | 0.5005 | 1.10 (0.53 - 2.27)  | 0.8013 | 250 (45.9) | 234 (42.9) |
| 1.23 (0.80 - 1.90) | 0.3404 | 1.14 (0.49 - 2.68)  | 0.7577 | 319 (58.5) | 188 (34.5) |
| 0.66 (0.43 - 1.02) | 0.0638 | 1.32 (0.49 - 3.51)  | 0.583  | 332 (60.8) | 180 (33.0) |
| 0.87 (0.57 - 1.32) | 0.5107 | 0.95 (0.46 - 1.97)  | 0.8932 | 271 (49.7) | 216 (39.6) |
| 1.33 (0.83 - 2.12) | 0.2344 | 1.98 (1.16 - 3.39)  | 0.012  | 163 (29.9) | 274 (50.2) |
| 0.67 (0.44 - 1.02) | 0.0634 | 4.98 (1.42 - 17.49) | 0.0122 | 335 (61.4) | 180 (33.0) |
| 1.60 (0.97 - 2.64) | 0.0661 | 0.40 (0.13 - 1.28)  | 0.1223 | 341 (62.3) | 186 (34.0) |
| 0.95 (0.59 - 1.51) | 0.8188 | 0.57 (0.16 - 2.04)  | 0.3905 | 375 (68.8) | 153 (28.1) |
| 1.29 (0.84 - 1.97) | 0.2465 | 1.41 (0.69 - 2.91)  | 0.3453 | 233 (42.7) | 254 (46.5) |
| 0.74 (0.43 - 1.27) | 0.2752 | ( - )               | --     | 453 (83.1) | 90 (16.5)  |
| 1.05 (0.68 - 1.61) | 0.8412 | 1.16 (0.55 - 2.43)  | 0.6969 | 266 (48.7) | 230 (42.1) |
| 0.70 (0.40 - 1.23) | 0.2188 | ( - )               | --     | 460 (84.1) | 85 (15.5)  |
| 1.07 (0.65 - 1.75) | 0.7912 | 0.80 (0.24 - 2.72)  | 0.7254 | 389 (71.5) | 137 (25.2) |
| 1.38 (0.88 - 2.17) | 0.1622 | 0.85 (0.44 - 1.65)  | 0.6332 | 252 (46.2) | 241 (44.1) |
| 0.70 (0.43 - 1.14) | 0.1544 | 1.06 (0.07 - 16.97) | 0.9673 | 414 (76.1) | 124 (22.8) |
| 0.89 (0.58 - 1.39) | 0.6186 | 1.73 (0.40 - 7.53)  | 0.4658 | 355 (65.0) | 177 (32.4) |
| 2.00 (1.07 - 3.74) | 0.03   | 0.97 (0.15 - 6.06)  | 0.9727 | 428 (78.5) | 108 (19.8) |
| 1.20 (0.74 - 1.94) | 0.4716 | 1.07 (0.64 - 1.78)  | 0.7899 | 157 (28.7) | 262 (47.9) |
| 0.83 (0.54 - 1.29) | 0.4151 | 1.04 (0.56 - 1.91)  | 0.9084 | 247 (45.3) | 225 (41.3) |
| 0.99 (0.62 - 1.57) | 0.9651 | 1.80 (1.02 - 3.17)  | 0.041  | 164 (30.1) | 262 (48.1) |
| 1.36 (0.86 - 2.15) | 0.1913 | 1.11 (0.44 - 2.80)  | 0.8173 | 342 (62.5) | 176 (32.2) |
| 1.18 (0.76 - 1.83) | 0.4544 | 0.90 (0.44 - 1.87)  | 0.7856 | 250 (45.7) | 244 (44.6) |
| 1.55 (0.99 - 2.42) | 0.0555 | 1.06 (0.45 - 2.50)  | 0.8859 | 277 (51.0) | 230 (42.4) |
| 1.81 (1.11 - 2.95) | 0.0168 | 1.57 (0.60 - 4.16)  | 0.3598 | 315 (57.6) | 202 (36.9) |
| 0.78 (0.46 - 1.31) | 0.3438 | 0.95 (0.23 - 3.96)  | 0.9439 | 402 (73.9) | 132 (24.3) |
| 1.05 (0.62 - 1.77) | 0.8525 | 1.51 (0.50 - 4.51)  | 0.4641 | 396 (72.5) | 133 (24.4) |
| 0.81 (0.43 - 1.52) | 0.5152 | 0.00 (0.00 - )      | 0.99   | 449 (82.7) | 93 (17.1)  |
| 1.82 (1.15 - 2.89) | 0.0112 | 0.82 (0.33 - 2.01)  | 0.6667 | 299 (54.7) | 218 (39.9) |
| 1.02 (0.67 - 1.55) | 0.9213 | 1.58 (0.81 - 3.10)  | 0.1838 | 240 (44.1) | 242 (44.5) |
| 0.93 (0.62 - 1.41) | 0.7496 | 1.35 (0.57 - 3.19)  | 0.4952 | 303 (55.8) | 207 (38.1) |
| 0.86 (0.56 - 1.34) | 0.5145 | 1.41 (0.49 - 4.08)  | 0.5275 | 338 (61.8) | 183 (33.5) |
| 0.67 (0.34 - 1.30) | 0.2329 | 0.00 (0.00 - )      | 0.9854 | 487 (89.5) | 55 (10.1)  |
| 1.42 (0.94 - 2.13) | 0.0963 | 1.01 (0.50 - 2.06)  | 0.9741 | 234 (42.9) | 254 (46.5) |
| 0.80 (0.44 - 1.46) | 0.4652 | ( - )               | --     | 496 (90.8) | 50 (9.2)   |
| 1.37 (0.88 - 2.13) | 0.1686 | 1.46 (0.70 - 3.04)  | 0.3088 | 278 (51.4) | 217 (40.1) |
| 0.76 (0.39 - 1.49) | 0.4292 | ( - )               | --     | 480 (87.9) | 65 (11.9)  |
| 0.93 (0.49 - 1.76) | 0.8233 | 4110854 (0.00 - )   | 0.9878 | 493 (90.8) | 46 (8.5)   |
| 1.03 (0.54 - 1.99) | 0.92   | 1526293 (0.00 - )   | 0.9867 | 487 (89.0) | 55 (10.1)  |
| 1.07 (0.62 - 1.86) | 0.7984 | 1444152 (0.00 - )   | 0.9907 | 454 (83.0) | 90 (16.5)  |
| 0.82 (0.42 - 1.63) | 0.5804 | 1.03 (0.06 - 16.53) | 0.9822 | 485 (89.3) | 57 (10.5)  |
| 1.22 (0.77 - 1.91) | 0.3951 | 0.80 (0.19 - 3.33)  | 0.7642 | 391 (71.5) | 146 (26.7) |
| 2.63 (1.43 - 4.82) | 0.0018 | 6.13 (0.70 - 53.79) | 0.1015 | 417 (76.4) | 115 (21.1) |
| 1.28 (0.75 - 2.17) | 0.3625 | 0.24 (0.03 - 2.17)  | 0.2054 | 413 (75.8) | 127 (23.3) |
| 1.61 (0.98 - 2.65) | 0.059  | 0.47 (0.14 - 1.60)  | 0.2282 | 382 (70.1) | 149 (27.3) |
| 1.44 (0.87 - 2.37) | 0.1548 | 1.33 (0.31 - 5.72)  | 0.6994 | 399 (72.9) | 136 (24.9) |
| 1.37 (0.78 - 2.38) | 0.2695 | 0.95 (0.06 - 15.31) | 0.974  | 458 (83.7) | 85 (15.5)  |
| 1.12 (0.73 - 1.72) | 0.6092 | 1.56 (0.95 - 2.59)  | 0.0813 | 172 (31.6) | 272 (50.0) |
| 1.04 (0.57 - 1.90) | 0.8903 | 0.37 (0.03 - 4.62)  | 0.4411 | 434 (79.3) | 107 (19.6) |
| 0.73 (0.47 - 1.13) | 0.1607 | 0.87 (0.54 - 1.41)  | 0.5752 | 173 (31.6) | 270 (49.4) |
| 1.22 (0.67 - 2.22) | 0.5196 | 0.94 (0.06 - 14.99) | 0.9629 | 456 (83.5) | 87 (15.9)  |
| 1.09 (0.68 - 1.75) | 0.7182 | 0.79 (0.17 - 3.81)  | 0.7737 | 400 (73.1) | 134 (24.5) |
| 0.69 (0.44 - 1.08) | 0.1015 | 0.87 (0.53 - 1.41)  | 0.5649 | 173 (31.7) | 269 (49.3) |

|                    |        |                     |        |            |            |
|--------------------|--------|---------------------|--------|------------|------------|
| 1.11 (0.63 - 1.98) | 0.7116 | 1.74 (0.10 - 31.68) | 0.7075 | 447 (81.7) | 99 (18.1)  |
| 1.16 (0.75 - 1.79) | 0.5007 | 1.56 (0.93 - 2.62)  | 0.0949 | 190 (34.7) | 252 (46.1) |
| 1.34 (0.86 - 2.08) | 0.1938 | 1.10 (0.52 - 2.31)  | 0.8035 | 300 (54.9) | 217 (39.7) |
| 1.24 (0.79 - 1.93) | 0.356  | 1.21 (0.70 - 2.08)  | 0.493  | 215 (39.4) | 264 (48.4) |
| 0.63 (0.39 - 1.02) | 0.0613 | 0.74 (0.47 - 1.18)  | 0.2095 | 133 (24.4) | 271 (49.6) |
| 1.30 (0.85 - 1.98) | 0.2301 | 1.07 (0.58 - 1.98)  | 0.8349 | 252 (46.1) | 242 (44.2) |
| 1.26 (0.73 - 2.16) | 0.4096 | 0.67 (0.06 - 8.02)  | 0.754  | 457 (83.5) | 85 (15.5)  |
| 1.37 (0.65 - 2.88) | 0.4129 | ( - )               | --     | 477 (87.5) | 66 (12.1)  |
| 1.16 (0.58 - 2.32) | 0.6666 | 0.59 (0.03 - 10.58) | 0.7187 | 456 (84.0) | 83 (15.3)  |
| 1.15 (0.53 - 2.48) | 0.7287 | 0.59 (0.03 - 10.59) | 0.7196 | 478 (87.5) | 65 (11.9)  |
| 1.28 (0.83 - 1.97) | 0.2657 | 1.08 (0.56 - 2.06)  | 0.8261 | 287 (52.5) | 225 (41.1) |
| 0.60 (0.38 - 0.94) | 0.0253 | 0.76 (0.36 - 1.58)  | 0.4561 | 307 (56.2) | 207 (37.9) |
| 0.85 (0.45 - 1.60) | 0.6136 | 1333375 (0.00 - )   | 0.9868 | 466 (85.3) | 78 (14.3)  |
| 0.92 (0.58 - 1.46) | 0.7366 | 2.53 (1.03 - 6.19)  | 0.0424 | 314 (57.5) | 198 (36.3) |
| 0.52 (0.22 - 1.27) | 0.1532 | 1.24 (0.08 - 20.26) | 0.8776 | 506 (92.5) | 40 (7.3)   |
| 1.20 (0.79 - 1.80) | 0.3943 | 1.13 (0.62 - 2.03)  | 0.6931 | 209 (38.3) | 262 (48.0) |
| 1.03 (0.58 - 1.83) | 0.9246 | ( - )               | --     | 451 (82.6) | 90 (16.5)  |
| 1.03 (0.58 - 1.83) | 0.9255 | 0.47 (0.09 - 2.44)  | 0.3652 | 451 (82.6) | 92 (16.8)  |
| 0.60 (0.36 - 1.00) | 0.0487 | 1.29 (0.75 - 2.22)  | 0.3625 | 156 (28.5) | 278 (50.8) |
| 1.68 (1.01 - 2.81) | 0.0466 | 1.72 (0.51 - 5.77)  | 0.3771 | 390 (71.4) | 136 (24.9) |
| 1.52 (0.95 - 2.45) | 0.083  | 0.71 (0.27 - 1.91)  | 0.504  | 346 (63.3) | 176 (32.2) |
| 1.15 (0.71 - 1.85) | 0.5772 | 1.54 (0.60 - 3.97)  | 0.3679 | 334 (61.1) | 179 (32.7) |
| 1.06 (0.69 - 1.64) | 0.7904 | 0.87 (0.40 - 1.91)  | 0.7296 | 282 (51.6) | 225 (41.2) |
| 1.07 (0.69 - 1.64) | 0.7742 | 1.65 (0.73 - 3.73)  | 0.2287 | 274 (50.3) | 230 (42.2) |
| 0.76 (0.48 - 1.18) | 0.2203 | 1.13 (0.63 - 2.03)  | 0.693  | 222 (40.6) | 253 (46.3) |
| 0.55 (0.25 - 1.22) | 0.1418 | 1.42 (0.12 - 16.24) | 0.7792 | 497 (90.9) | 46 (8.4)   |
| 1.32 (0.84 - 2.06) | 0.23   | 1.27 (0.71 - 2.27)  | 0.4121 | 187 (34.2) | 260 (47.6) |
| 0.92 (0.60 - 1.39) | 0.6772 | 0.90 (0.45 - 1.80)  | 0.7639 | 298 (54.5) | 213 (38.9) |
| 0.84 (0.54 - 1.31) | 0.4485 | 0.79 (0.33 - 1.90)  | 0.5936 | 331 (60.5) | 196 (35.8) |
| 1.64 (0.98 - 2.74) | 0.0599 | 1.46 (0.42 - 5.04)  | 0.5466 | 390 (71.3) | 139 (25.4) |
| 1.33 (0.85 - 2.08) | 0.2157 | 0.77 (0.32 - 1.88)  | 0.5695 | 331 (60.6) | 188 (34.4) |
| 1.75 (1.10 - 2.76) | 0.0173 | 1.55 (0.52 - 4.67)  | 0.4329 | 359 (65.6) | 162 (29.6) |
| 2.26 (1.30 - 3.96) | 0.0041 | 2.33 (0.45 - 11.97) | 0.3117 | 396 (72.7) | 136 (25.0) |
| 1.83 (1.08 - 3.12) | 0.0252 | 2.96 (0.61 - 14.42) | 0.1795 | 393 (72.0) | 136 (24.9) |
| 1.38 (0.65 - 2.91) | 0.3966 | ( - )               | --     | 502 (91.8) | 45 (8.2)   |
| 0.58 (0.31 - 1.09) | 0.0895 | 0.70 (0.06 - 8.48)  | 0.7759 | 476 (87.2) | 69 (12.6)  |

| Age<Q2<br>Genotype n(%)<br>2/2<br>Cases | Age<Q2<br>Genotype n(%)<br>1/1<br>Controls | Age<Q2<br>Genotype n(%)<br>1/2<br>Controls | Age<Q2<br>Genotype n(%)<br>2/2<br>Controls | PD susceptibility:<br>Age<Q2<br>Trend Model<br>OR (95%CI) | PD susceptibility:<br>Age<Q2<br>Trend P-value |
|-----------------------------------------|--------------------------------------------|--------------------------------------------|--------------------------------------------|-----------------------------------------------------------|-----------------------------------------------|
| 87 (16.1)                               | 203 (37.5)                                 | 253 (46.7)                                 | 86 (15.9)                                  | 0.91 (0.74 - 1.13)                                        | 0.4078                                        |
| 105 (19.2)                              | 179 (32.8)                                 | 266 (48.7)                                 | 101 (18.5)                                 | 1.02 (0.83 - 1.26)                                        | 0.8259                                        |
| 2 (0.4)                                 | 453 (82.8)                                 | 90 (16.5)                                  | 4 (0.7)                                    | 0.92 (0.63 - 1.33)                                        | 0.6425                                        |
| 0 (0.0)                                 | 503 (92.1)                                 | 41 (7.5)                                   | 2 (0.4)                                    | 0.95 (0.57 - 1.58)                                        | 0.8414                                        |
| 128 (23.4)                              | 151 (27.7)                                 | 260 (47.6)                                 | 135 (24.7)                                 | 0.99 (0.80 - 1.22)                                        | 0.9071                                        |
| 86 (15.8)                               | 198 (36.3)                                 | 257 (47.1)                                 | 91 (16.7)                                  | 0.99 (0.81 - 1.22)                                        | 0.9461                                        |
| 110 (20.1)                              | 175 (32.0)                                 | 256 (46.8)                                 | 116 (21.2)                                 | 1.00 (0.81 - 1.23)                                        | 0.9877                                        |
| 10 (1.8)                                | 410 (75.0)                                 | 122 (22.3)                                 | 15 (2.7)                                   | 0.90 (0.67 - 1.20)                                        | 0.4595                                        |
| 98 (18.0)                               | 192 (35.3)                                 | 264 (48.5)                                 | 88 (16.2)                                  | 1.13 (0.91 - 1.40)                                        | 0.2819                                        |
| 110 (20.1)                              | 175 (32.0)                                 | 256 (46.8)                                 | 116 (21.2)                                 | 1.00 (0.81 - 1.23)                                        | 0.9877                                        |
| 3 (0.6)                                 | 484 (88.8)                                 | 58 (10.6)                                  | 3 (0.6)                                    | 0.97 (0.62 - 1.54)                                        | 0.9085                                        |
| 6 (1.1)                                 | 429 (78.6)                                 | 106 (19.4)                                 | 11 (2.0)                                   | 1.05 (0.77 - 1.43)                                        | 0.7686                                        |
| 2 (0.4)                                 | 459 (84.1)                                 | 84 (15.4)                                  | 3 (0.5)                                    | 1.24 (0.86 - 1.78)                                        | 0.2542                                        |
| 35 (6.4)                                | 328 (60.3)                                 | 184 (33.8)                                 | 32 (5.9)                                   | 1.15 (0.91 - 1.45)                                        | 0.2515                                        |
| 6 (1.1)                                 | 459 (84.1)                                 | 82 (15.0)                                  | 5 (0.9)                                    | 1.10 (0.75 - 1.61)                                        | 0.6114                                        |
| 11 (2.0)                                | 419 (76.6)                                 | 113 (20.7)                                 | 15 (2.7)                                   | 0.97 (0.71 - 1.33)                                        | 0.8662                                        |
| 18 (3.3)                                | 362 (66.4)                                 | 164 (30.1)                                 | 19 (3.5)                                   | 0.88 (0.65 - 1.19)                                        | 0.4074                                        |
| 40 (7.4)                                | 287 (52.8)                                 | 218 (40.1)                                 | 39 (7.2)                                   | 0.94 (0.75 - 1.18)                                        | 0.5815                                        |
| 21 (3.8)                                | 360 (65.9)                                 | 163 (29.9)                                 | 23 (4.2)                                   | 1.04 (0.80 - 1.35)                                        | 0.7729                                        |
| 130 (23.8)                              | 131 (24.0)                                 | 283 (51.8)                                 | 132 (24.2)                                 | 0.85 (0.69 - 1.05)                                        | 0.1432                                        |
| 3 (0.6)                                 | 482 (88.4)                                 | 61 (11.2)                                  | 2 (0.4)                                    | 1.13 (0.76 - 1.68)                                        | 0.557                                         |
| 140 (25.8)                              | 144 (26.5)                                 | 254 (46.8)                                 | 145 (26.7)                                 | 1.02 (0.83 - 1.25)                                        | 0.8278                                        |
| 10 (1.8)                                | 431 (78.8)                                 | 110 (20.1)                                 | 6 (1.1)                                    | 0.82 (0.60 - 1.14)                                        | 0.2357                                        |
| 102 (18.6)                              | 177 (32.4)                                 | 256 (46.8)                                 | 114 (20.8)                                 | 0.93 (0.75 - 1.15)                                        | 0.5153                                        |
| 26 (4.8)                                | 329 (60.5)                                 | 187 (34.4)                                 | 28 (5.1)                                   | 1.08 (0.86 - 1.36)                                        | 0.5077                                        |
| 13 (2.4)                                | 367 (67.3)                                 | 164 (30.1)                                 | 14 (2.6)                                   | 1.03 (0.78 - 1.34)                                        | 0.8447                                        |
| 57 (10.4)                               | 249 (45.6)                                 | 239 (43.8)                                 | 58 (10.6)                                  | 1.00 (0.81 - 1.23)                                        | 0.9915                                        |
| 31 (5.7)                                | 350 (64.2)                                 | 168 (30.8)                                 | 27 (5.0)                                   | 1.16 (0.90 - 1.48)                                        | 0.2516                                        |
| 45 (8.2)                                | 287 (52.5)                                 | 214 (39.1)                                 | 46 (8.4)                                   | 0.87 (0.70 - 1.09)                                        | 0.2297                                        |
| 137 (25.1)                              | 140 (25.6)                                 | 268 (49.1)                                 | 138 (25.3)                                 | 1.01 (0.82 - 1.25)                                        | 0.8997                                        |
| 87 (15.9)                               | 216 (39.5)                                 | 232 (42.4)                                 | 99 (18.1)                                  | 1.05 (0.85 - 1.29)                                        | 0.6712                                        |
| 13 (2.4)                                | 385 (70.5)                                 | 147 (26.9)                                 | 14 (2.6)                                   | 1.25 (0.95 - 1.66)                                        | 0.1125                                        |
| 61 (11.2)                               | 240 (44.0)                                 | 243 (44.5)                                 | 63 (11.5)                                  | 0.97 (0.78 - 1.21)                                        | 0.7872                                        |
| 18 (3.3)                                | 374 (68.9)                                 | 156 (28.7)                                 | 13 (2.4)                                   | 0.89 (0.67 - 1.17)                                        | 0.3867                                        |
| 26 (4.8)                                | 341 (62.6)                                 | 174 (31.9)                                 | 30 (5.5)                                   | 0.89 (0.70 - 1.15)                                        | 0.3771                                        |
| 10 (1.9)                                | 481 (89.4)                                 | 43 (8.0)                                   | 14 (2.6)                                   | 0.93 (0.61 - 1.41)                                        | 0.7375                                        |
| 7 (1.3)                                 | 443 (81.0)                                 | 95 (17.4)                                  | 9 (1.6)                                    | 0.97 (0.69 - 1.35)                                        | 0.8538                                        |
| 8 (1.5)                                 | 456 (83.7)                                 | 85 (15.6)                                  | 4 (0.7)                                    | 1.01 (0.71 - 1.45)                                        | 0.9446                                        |
| 5 (0.9)                                 | 478 (87.9)                                 | 59 (10.8)                                  | 7 (1.3)                                    | 1.18 (0.80 - 1.73)                                        | 0.4024                                        |
| 0 (0.0)                                 | 504 (92.1)                                 | 43 (7.9)                                   | 0 (0.0)                                    | 0.67 (0.38 - 1.18)                                        | 0.1663                                        |
| 4 (0.7)                                 | 470 (85.9)                                 | 73 (13.3)                                  | 4 (0.7)                                    | 1.05 (0.69 - 1.60)                                        | 0.83                                          |
| 51 (9.4)                                | 270 (49.5)                                 | 212 (38.9)                                 | 63 (11.6)                                  | 1.02 (0.82 - 1.27)                                        | 0.8318                                        |
| 22 (4.0)                                | 354 (65.0)                                 | 173 (31.7)                                 | 18 (3.3)                                   | 0.90 (0.68 - 1.19)                                        | 0.4523                                        |
| 92 (16.8)                               | 190 (34.8)                                 | 270 (49.5)                                 | 86 (15.8)                                  | 1.05 (0.84 - 1.30)                                        | 0.6708                                        |
| 129 (23.6)                              | 163 (29.8)                                 | 262 (47.9)                                 | 122 (22.3)                                 | 1.00 (0.82 - 1.22)                                        | 0.9897                                        |
| 49 (9.0)                                | 272 (49.7)                                 | 240 (43.9)                                 | 35 (6.4)                                   | 1.12 (0.90 - 1.41)                                        | 0.3153                                        |
| 51 (9.4)                                | 268 (49.2)                                 | 233 (42.8)                                 | 44 (8.1)                                   | 1.08 (0.86 - 1.35)                                        | 0.5198                                        |
| 12 (2.2)                                | 418 (76.7)                                 | 114 (20.9)                                 | 13 (2.4)                                   | 1.25 (0.92 - 1.69)                                        | 0.1491                                        |



|            |            |            |            |                    |        |
|------------|------------|------------|------------|--------------------|--------|
| 15 (2.7)   | 406 (74.4) | 127 (23.3) | 13 (2.4)   | 1.20 (0.89 - 1.61) | 0.232  |
| 61 (11.2)  | 251 (46.1) | 245 (45.0) | 49 (9.0)   | 1.07 (0.85 - 1.35) | 0.5488 |
| 38 (7.0)   | 335 (61.5) | 176 (32.3) | 34 (6.2)   | 1.14 (0.90 - 1.44) | 0.2932 |
| 34 (6.2)   | 297 (54.4) | 216 (39.6) | 33 (6.0)   | 0.77 (0.60 - 0.98) | 0.0367 |
| 58 (10.6)  | 265 (48.6) | 219 (40.2) | 61 (11.2)  | 0.94 (0.76 - 1.17) | 0.5865 |
| 109 (20.0) | 181 (33.2) | 268 (49.1) | 97 (17.8)  | 1.20 (0.97 - 1.50) | 0.0945 |
| 31 (5.7)   | 317 (58.1) | 207 (37.9) | 22 (4.0)   | 0.91 (0.71 - 1.17) | 0.4686 |
| 20 (3.7)   | 359 (65.6) | 166 (30.3) | 22 (4.0)   | 1.15 (0.87 - 1.51) | 0.3181 |
| 17 (3.1)   | 372 (68.3) | 158 (29.0) | 15 (2.8)   | 0.98 (0.75 - 1.29) | 0.9099 |
| 59 (10.8)  | 246 (45.1) | 251 (46.0) | 49 (9.0)   | 1.16 (0.93 - 1.45) | 0.1974 |
| 2 (0.4)    | 457 (83.9) | 84 (15.4)  | 4 (0.7)    | 1.01 (0.68 - 1.50) | 0.9563 |
| 50 (9.2)   | 274 (50.2) | 232 (42.5) | 40 (7.3)   | 1.11 (0.89 - 1.39) | 0.3619 |
| 2 (0.4)    | 464 (84.8) | 80 (14.6)  | 3 (0.5)    | 1.04 (0.69 - 1.57) | 0.8447 |
| 18 (3.3)   | 390 (71.7) | 144 (26.5) | 10 (1.8)   | 1.09 (0.82 - 1.45) | 0.5641 |
| 53 (9.7)   | 250 (45.8) | 250 (45.8) | 46 (8.4)   | 1.03 (0.81 - 1.31) | 0.8028 |
| 6 (1.1)    | 407 (74.8) | 131 (24.1) | 6 (1.1)    | 0.91 (0.67 - 1.25) | 0.5711 |
| 14 (2.6)   | 366 (67.0) | 167 (30.6) | 13 (2.4)   | 1.10 (0.83 - 1.45) | 0.5199 |
| 9 (1.7)    | 453 (83.1) | 86 (15.8)  | 6 (1.1)    | 1.59 (1.11 - 2.28) | 0.0108 |
| 128 (23.4) | 164 (30.0) | 263 (48.1) | 120 (21.9) | 1.08 (0.87 - 1.33) | 0.4836 |
| 73 (13.4)  | 245 (45.0) | 235 (43.1) | 65 (11.9)  | 1.04 (0.84 - 1.28) | 0.7213 |
| 119 (21.8) | 161 (29.5) | 269 (49.4) | 115 (21.1) | 1.02 (0.82 - 1.26) | 0.8802 |
| 29 (5.3)   | 351 (64.2) | 178 (32.5) | 18 (3.3)   | 1.15 (0.89 - 1.50) | 0.2825 |
| 53 (9.7)   | 248 (45.3) | 251 (45.9) | 48 (8.8)   | 1.00 (0.80 - 1.25) | 0.9978 |
| 36 (6.6)   | 290 (53.4) | 222 (40.9) | 31 (5.7)   | 1.15 (0.90 - 1.47) | 0.2731 |
| 30 (5.5)   | 340 (62.2) | 185 (33.8) | 22 (4.0)   | 1.32 (1.02 - 1.73) | 0.0377 |
| 10 (1.8)   | 402 (73.9) | 131 (24.1) | 11 (2.0)   | 0.95 (0.68 - 1.32) | 0.7484 |
| 17 (3.1)   | 391 (71.6) | 143 (26.2) | 12 (2.2)   | 1.04 (0.77 - 1.40) | 0.7959 |
| 1 (0.2)    | 438 (80.7) | 103 (19.0) | 2 (0.4)    | 0.77 (0.51 - 1.16) | 0.209  |
| 30 (5.5)   | 322 (58.9) | 198 (36.2) | 27 (4.9)   | 1.23 (0.95 - 1.58) | 0.1192 |
| 62 (11.4)  | 244 (44.9) | 237 (43.6) | 63 (11.6)  | 1.03 (0.82 - 1.28) | 0.8185 |
| 33 (6.1)   | 300 (55.2) | 219 (40.3) | 24 (4.4)   | 1.03 (0.81 - 1.31) | 0.8178 |
| 26 (4.8)   | 344 (62.9) | 183 (33.5) | 20 (3.7)   | 1.08 (0.84 - 1.40) | 0.5488 |
| 2 (0.4)    | 474 (87.1) | 63 (11.6)  | 7 (1.3)    | 0.64 (0.41 - 0.99) | 0.0462 |
| 58 (10.6)  | 251 (46.0) | 245 (44.9) | 50 (9.2)   | 1.17 (0.94 - 1.46) | 0.1501 |
| 0 (0.0)    | 481 (88.1) | 64 (11.7)  | 1 (0.2)    | 0.69 (0.45 - 1.07) | 0.0946 |
| 46 (8.5)   | 287 (53.0) | 216 (39.9) | 38 (7.0)   | 1.13 (0.88 - 1.44) | 0.3343 |
| 1 (0.2)    | 484 (88.6) | 61 (11.2)  | 1 (0.2)    | 1.07 (0.67 - 1.71) | 0.7702 |
| 4 (0.7)    | 480 (88.4) | 63 (11.6)  | 0 (0.0)    | 0.83 (0.55 - 1.25) | 0.3686 |
| 5 (0.9)    | 486 (88.8) | 60 (11.0)  | 1 (0.2)    | 1.13 (0.74 - 1.73) | 0.5601 |
| 3 (0.5)    | 455 (83.2) | 89 (16.3)  | 3 (0.5)    | 1.00 (0.69 - 1.43) | 0.9887 |
| 1 (0.2)    | 472 (86.9) | 70 (12.9)  | 1 (0.2)    | 0.73 (0.47 - 1.12) | 0.15   |
| 10 (1.8)   | 398 (72.8) | 141 (25.8) | 8 (1.5)    | 1.08 (0.80 - 1.46) | 0.5975 |
| 14 (2.6)   | 434 (79.5) | 105 (19.2) | 7 (1.3)    | 1.40 (1.00 - 1.94) | 0.0472 |
| 5 (0.9)    | 427 (78.3) | 110 (20.2) | 8 (1.5)    | 1.14 (0.81 - 1.60) | 0.453  |
| 14 (2.6)   | 399 (73.2) | 128 (23.5) | 18 (3.3)   | 1.13 (0.86 - 1.49) | 0.371  |
| 12 (2.2)   | 404 (73.9) | 137 (25.0) | 6 (1.1)    | 1.11 (0.82 - 1.52) | 0.4951 |
| 4 (0.7)    | 471 (86.1) | 72 (13.2)  | 4 (0.7)    | 1.24 (0.86 - 1.79) | 0.2412 |
| 100 (18.4) | 167 (30.7) | 282 (51.8) | 95 (17.5)  | 1.00 (0.81 - 1.23) | 0.9866 |
| 6 (1.1)    | 443 (81.0) | 99 (18.1)  | 5 (0.9)    | 1.11 (0.78 - 1.58) | 0.5532 |
| 104 (19.0) | 174 (31.8) | 262 (47.9) | 111 (20.3) | 0.99 (0.81 - 1.21) | 0.9381 |
| 3 (0.5)    | 464 (85.0) | 80 (14.7)  | 2 (0.4)    | 1.18 (0.79 - 1.76) | 0.4177 |
| 13 (2.4)   | 402 (73.5) | 135 (24.7) | 10 (1.8)   | 1.06 (0.79 - 1.41) | 0.7106 |
| 104 (19.0) | 171 (31.3) | 265 (48.5) | 110 (20.1) | 0.98 (0.80 - 1.20) | 0.839  |

|            |            |            |            |                    |        |
|------------|------------|------------|------------|--------------------|--------|
| 1 (0.2)    | 452 (82.6) | 90 (16.5)  | 5 (0.9)    | 1.00 (0.69 - 1.44) | 0.9981 |
| 105 (19.2) | 194 (35.5) | 255 (46.6) | 98 (17.9)  | 1.04 (0.86 - 1.27) | 0.667  |
| 29 (5.3)   | 306 (56.0) | 204 (37.4) | 36 (6.6)   | 1.00 (0.79 - 1.27) | 0.9935 |
| 67 (12.3)  | 211 (38.6) | 261 (47.8) | 74 (13.6)  | 0.92 (0.74 - 1.15) | 0.4659 |
| 142 (26.0) | 127 (23.3) | 267 (48.9) | 152 (27.8) | 0.93 (0.76 - 1.15) | 0.5161 |
| 53 (9.7)   | 260 (47.5) | 228 (41.7) | 59 (10.8)  | 0.99 (0.80 - 1.23) | 0.9586 |
| 5 (0.9)    | 467 (85.4) | 74 (13.5)  | 6 (1.1)    | 1.16 (0.81 - 1.66) | 0.4043 |
| 2 (0.4)    | 485 (89.0) | 59 (10.8)  | 1 (0.2)    | 1.17 (0.73 - 1.89) | 0.5107 |
| 4 (0.7)    | 460 (84.7) | 80 (14.7)  | 3 (0.6)    | 1.05 (0.70 - 1.56) | 0.8153 |
| 3 (0.5)    | 482 (88.3) | 61 (11.2)  | 3 (0.5)    | 1.05 (0.68 - 1.62) | 0.8201 |
| 35 (6.4)   | 291 (53.2) | 214 (39.1) | 42 (7.7)   | 0.97 (0.77 - 1.22) | 0.7958 |
| 32 (5.9)   | 289 (52.9) | 226 (41.4) | 31 (5.7)   | 0.87 (0.69 - 1.11) | 0.2748 |
| 2 (0.4)    | 467 (85.5) | 76 (13.9)  | 3 (0.5)    | 0.93 (0.60 - 1.44) | 0.7382 |
| 34 (6.2)   | 300 (54.9) | 217 (39.7) | 29 (5.3)   | 0.91 (0.71 - 1.17) | 0.4514 |
| 1 (0.2)    | 503 (92.0) | 43 (7.9)   | 1 (0.2)    | 0.86 (0.49 - 1.49) | 0.5828 |
| 75 (13.7)  | 212 (38.8) | 256 (46.9) | 78 (14.3)  | 0.98 (0.79 - 1.21) | 0.8456 |
| 5 (0.9)    | 461 (84.4) | 82 (15.0)  | 3 (0.5)    | 1.27 (0.86 - 1.86) | 0.2347 |
| 3 (0.5)    | 461 (84.4) | 79 (14.5)  | 6 (1.1)    | 1.10 (0.76 - 1.59) | 0.6038 |
| 113 (20.7) | 141 (25.8) | 308 (56.3) | 98 (17.9)  | 1.00 (0.79 - 1.26) | 0.9964 |
| 20 (3.7)   | 425 (77.8) | 110 (20.1) | 11 (2.0)   | 1.59 (1.17 - 2.17) | 0.0031 |
| 25 (4.6)   | 386 (70.6) | 138 (25.2) | 23 (4.2)   | 1.50 (1.13 - 2.00) | 0.0056 |
| 34 (6.2)   | 367 (67.1) | 158 (28.9) | 22 (4.0)   | 1.47 (1.12 - 1.93) | 0.0059 |
| 39 (7.1)   | 284 (52.0) | 216 (39.6) | 46 (8.4)   | 0.97 (0.76 - 1.25) | 0.8206 |
| 41 (7.5)   | 264 (48.4) | 244 (44.8) | 37 (6.8)   | 0.94 (0.74 - 1.19) | 0.597  |
| 72 (13.2)  | 220 (40.2) | 262 (47.9) | 65 (11.9)  | 1.03 (0.83 - 1.29) | 0.778  |
| 4 (0.7)    | 495 (90.5) | 51 (9.3)   | 1 (0.2)    | 1.05 (0.65 - 1.71) | 0.8356 |
| 99 (18.1)  | 209 (38.3) | 244 (44.7) | 93 (17.0)  | 1.18 (0.94 - 1.48) | 0.1479 |
| 36 (6.6)   | 287 (52.5) | 223 (40.8) | 37 (6.8)   | 0.94 (0.75 - 1.19) | 0.6209 |
| 20 (3.7)   | 330 (60.3) | 187 (34.2) | 30 (5.5)   | 0.90 (0.70 - 1.17) | 0.4446 |
| 18 (3.3)   | 427 (78.1) | 109 (19.9) | 11 (2.0)   | 1.62 (1.18 - 2.21) | 0.0028 |
| 27 (4.9)   | 359 (65.8) | 158 (28.9) | 29 (5.3)   | 1.22 (0.94 - 1.59) | 0.1345 |
| 26 (4.8)   | 400 (73.1) | 133 (24.3) | 14 (2.6)   | 1.61 (1.22 - 2.14) | 0.0009 |
| 13 (2.4)   | 438 (80.4) | 99 (18.2)  | 8 (1.5)    | 1.82 (1.30 - 2.56) | 0.0006 |
| 17 (3.1)   | 432 (79.1) | 104 (19.0) | 10 (1.8)   | 1.69 (1.22 - 2.34) | 0.0016 |
| 0 (0.0)    | 507 (92.7) | 40 (7.3)   | 0 (0.0)    | 1.19 (0.69 - 2.06) | 0.528  |
| 1 (0.2)    | 463 (84.8) | 81 (14.8)  | 2 (0.4)    | 0.79 (0.53 - 1.19) | 0.255  |

| PD susceptibility:<br>Age<Q2<br>Dominant Model<br>OR (95%CI) | PD susceptibility:<br>Age<Q2<br>Dominant<br>P-value | PD susceptibility:<br>Age<Q2<br>Recessive Model<br>OR (95%CI) | PD susceptibility:<br>Age<Q2<br>Recessive<br>P-value | Age>Q2<br>Genotype n(%)<br>1/1<br>Cases | Age>Q2<br>Genotype n(%)<br>1/2<br>Cases |
|--------------------------------------------------------------|-----------------------------------------------------|---------------------------------------------------------------|------------------------------------------------------|-----------------------------------------|-----------------------------------------|
| 0.86 (0.64 - 1.15)                                           | 0.3114                                              | 0.97 (0.66 - 1.41)                                            | 0.855                                                | 199 (38.7)                              | 246 (47.9)                              |
| 0.97 (0.72 - 1.30)                                           | 0.8193                                              | 1.13 (0.79 - 1.64)                                            | 0.5006                                               | 179 (33.5)                              | 260 (48.6)                              |
| 0.96 (0.65 - 1.42)                                           | 0.8364                                              | 0.35 (0.06 - 2.03)                                            | 0.2433                                               | 448 (83.1)                              | 85 (15.8)                               |
| 1.01 (0.60 - 1.72)                                           | 0.9564                                              | 0.00 (0.00 - )                                                | 0.9868                                               | 483 (90.6)                              | 50 (9.4)                                |
| 1.06 (0.78 - 1.46)                                           | 0.6985                                              | 0.90 (0.64 - 1.27)                                            | 0.5442                                               | 143 (26.7)                              | 276 (51.5)                              |
| 1.04 (0.77 - 1.41)                                           | 0.7817                                              | 0.93 (0.65 - 1.31)                                            | 0.6646                                               | 182 (33.8)                              | 265 (49.2)                              |
| 1.08 (0.79 - 1.49)                                           | 0.6256                                              | 0.92 (0.66 - 1.28)                                            | 0.6295                                               | 152 (28.2)                              | 284 (52.7)                              |
| 0.94 (0.68 - 1.31)                                           | 0.7157                                              | 0.53 (0.20 - 1.37)                                            | 0.1893                                               | 409 (76.6)                              | 115 (21.5)                              |
| 1.10 (0.81 - 1.50)                                           | 0.5345                                              | 1.23 (0.85 - 1.79)                                            | 0.2763                                               | 193 (35.9)                              | 255 (47.4)                              |
| 1.08 (0.79 - 1.49)                                           | 0.6256                                              | 0.92 (0.66 - 1.28)                                            | 0.6295                                               | 152 (28.3)                              | 282 (52.4)                              |
| 0.97 (0.59 - 1.59)                                           | 0.9045                                              | 0.99 (0.14 - 7.00)                                            | 0.9886                                               | 486 (90.5)                              | 49 (9.1)                                |
| 1.14 (0.81 - 1.61)                                           | 0.4523                                              | 0.55 (0.20 - 1.49)                                            | 0.2384                                               | 400 (74.3)                              | 132 (24.5)                              |
| 1.27 (0.87 - 1.85)                                           | 0.2077                                              | 0.50 (0.05 - 5.52)                                            | 0.572                                                | 418 (78.1)                              | 115 (21.5)                              |
| 1.17 (0.88 - 1.54)                                           | 0.2797                                              | 1.20 (0.66 - 2.18)                                            | 0.5429                                               | 296 (55.1)                              | 213 (39.7)                              |
| 1.08 (0.72 - 1.62)                                           | 0.7227                                              | 1.73 (0.38 - 7.99)                                            | 0.4809                                               | 461 (85.5)                              | 74 (13.7)                               |
| 1.02 (0.73 - 1.43)                                           | 0.9111                                              | 0.59 (0.20 - 1.80)                                            | 0.3573                                               | 413 (76.8)                              | 117 (21.7)                              |
| 0.87 (0.63 - 1.20)                                           | 0.3937                                              | 0.93 (0.38 - 2.32)                                            | 0.8819                                               | 375 (69.7)                              | 140 (26.0)                              |
| 0.91 (0.68 - 1.20)                                           | 0.4909                                              | 1.00 (0.60 - 1.69)                                            | 0.9865                                               | 285 (53.1)                              | 208 (38.7)                              |
| 1.07 (0.80 - 1.45)                                           | 0.6433                                              | 0.88 (0.41 - 1.87)                                            | 0.7385                                               | 363 (67.3)                              | 156 (28.9)                              |
| 0.73 (0.52 - 1.01)                                           | 0.0589                                              | 0.94 (0.68 - 1.29)                                            | 0.6906                                               | 142 (26.3)                              | 266 (49.3)                              |
| 1.13 (0.73 - 1.73)                                           | 0.5921                                              | 1.46 (0.24 - 8.77)                                            | 0.677                                                | 478 (88.8)                              | 58 (10.8)                               |
| 1.10 (0.80 - 1.50)                                           | 0.5705                                              | 0.96 (0.69 - 1.34)                                            | 0.8094                                               | 138 (25.8)                              | 273 (51.0)                              |
| 0.74 (0.52 - 1.05)                                           | 0.091                                               | 1.91 (0.63 - 5.73)                                            | 0.25                                                 | 452 (83.9)                              | 84 (15.6)                               |
| 1.00 (0.73 - 1.35)                                           | 0.9817                                              | 0.81 (0.56 - 1.18)                                            | 0.2713                                               | 166 (30.9)                              | 274 (50.9)                              |
| 1.16 (0.87 - 1.54)                                           | 0.3173                                              | 0.91 (0.53 - 1.56)                                            | 0.7337                                               | 304 (56.4)                              | 201 (37.3)                              |
| 1.04 (0.77 - 1.40)                                           | 0.813                                               | 0.98 (0.41 - 2.32)                                            | 0.9629                                               | 374 (69.5)                              | 149 (27.7)                              |
| 1.02 (0.77 - 1.35)                                           | 0.8898                                              | 0.95 (0.60 - 1.48)                                            | 0.8058                                               | 246 (45.8)                              | 225 (41.9)                              |
| 1.16 (0.87 - 1.56)                                           | 0.3131                                              | 1.27 (0.68 - 2.35)                                            | 0.4568                                               | 329 (61.5)                              | 185 (34.6)                              |
| 0.81 (0.61 - 1.07)                                           | 0.1411                                              | 0.98 (0.59 - 1.61)                                            | 0.9288                                               | 296 (55.0)                              | 206 (38.3)                              |
| 1.04 (0.76 - 1.43)                                           | 0.7913                                              | 0.99 (0.71 - 1.38)                                            | 0.9365                                               | 134 (24.9)                              | 275 (51.1)                              |
| 1.20 (0.90 - 1.59)                                           | 0.2108                                              | 0.82 (0.55 - 1.23)                                            | 0.33                                                 | 176 (32.7)                              | 287 (53.2)                              |
| 1.32 (0.97 - 1.79)                                           | 0.0797                                              | 0.99 (0.42 - 2.35)                                            | 0.983                                                | 353 (65.5)                              | 173 (32.1)                              |
| 0.96 (0.72 - 1.28)                                           | 0.772                                               | 0.98 (0.63 - 1.52)                                            | 0.9204                                               | 235 (43.8)                              | 241 (44.9)                              |
| 0.79 (0.58 - 1.09)                                           | 0.1498                                              | 1.60 (0.71 - 3.58)                                            | 0.255                                                | 404 (75.1)                              | 123 (22.9)                              |
| 0.91 (0.68 - 1.22)                                           | 0.5312                                              | 0.74 (0.39 - 1.40)                                            | 0.3566                                               | 338 (62.7)                              | 176 (32.7)                              |
| 1.06 (0.64 - 1.75)                                           | 0.8243                                              | 0.42 (0.12 - 1.43)                                            | 0.165                                                | 479 (90.2)                              | 46 (8.7)                                |
| 1.00 (0.69 - 1.43)                                           | 0.9802                                              | 0.67 (0.19 - 2.43)                                            | 0.5428                                               | 438 (81.1)                              | 93 (17.2)                               |
| 0.91 (0.60 - 1.36)                                           | 0.6375                                              | 2.59 (0.76 - 8.87)                                            | 0.1286                                               | 427 (79.1)                              | 106 (19.6)                              |
| 1.28 (0.84 - 1.94)                                           | 0.2582                                              | 0.60 (0.14 - 2.52)                                            | 0.4867                                               | 466 (87.1)                              | 67 (12.5)                               |
| 0.67 (0.38 - 1.18)                                           | 0.1663                                              | ( - )                                                         | --                                                   | 513 (95.2)                              | 25 (4.6)                                |
| 1.07 (0.69 - 1.68)                                           | 0.7551                                              | 0.77 (0.15 - 3.96)                                            | 0.7591                                               | 456 (84.6)                              | 82 (15.2)                               |
| 1.16 (0.88 - 1.53)                                           | 0.2876                                              | 0.74 (0.46 - 1.17)                                            | 0.1915                                               | 253 (47.2)                              | 234 (43.7)                              |
| 0.84 (0.61 - 1.14)                                           | 0.2659                                              | 1.41 (0.59 - 3.36)                                            | 0.4357                                               | 357 (66.5)                              | 165 (30.7)                              |
| 1.01 (0.75 - 1.37)                                           | 0.9529                                              | 1.14 (0.78 - 1.69)                                            | 0.4939                                               | 199 (37.2)                              | 250 (46.7)                              |
| 0.94 (0.69 - 1.28)                                           | 0.7041                                              | 1.07 (0.77 - 1.49)                                            | 0.667                                                | 153 (28.5)                              | 269 (50.1)                              |
| 1.02 (0.77 - 1.35)                                           | 0.8923                                              | 1.65 (0.99 - 2.72)                                            | 0.0524                                               | 299 (55.5)                              | 207 (38.4)                              |
| 1.05 (0.79 - 1.40)                                           | 0.7273                                              | 1.23 (0.75 - 2.03)                                            | 0.4098                                               | 265 (49.3)                              | 234 (43.6)                              |
| 1.35 (0.96 - 1.90)                                           | 0.0834                                              | 0.87 (0.35 - 2.18)                                            | 0.7659                                               | 401 (74.8)                              | 133 (24.8)                              |

|                    |        |                     |        |            |            |
|--------------------|--------|---------------------|--------|------------|------------|
| 1.20 (0.86 - 1.67) | 0.2912 | 1.44 (0.59 - 3.52)  | 0.4264 | 399 (74.3) | 129 (24.0) |
| 0.99 (0.73 - 1.32) | 0.9229 | 1.41 (0.87 - 2.29)  | 0.1642 | 290 (53.9) | 215 (40.0) |
| 1.17 (0.87 - 1.57) | 0.2937 | 1.15 (0.66 - 2.02)  | 0.619  | 327 (60.7) | 190 (35.3) |
| 0.68 (0.50 - 0.91) | 0.0104 | 1.04 (0.58 - 1.85)  | 0.9035 | 318 (59.0) | 202 (37.5) |
| 0.92 (0.69 - 1.23) | 0.5813 | 0.94 (0.59 - 1.50)  | 0.8    | 265 (49.3) | 219 (40.7) |
| 1.28 (0.93 - 1.76) | 0.1283 | 1.20 (0.85 - 1.71)  | 0.305  | 167 (31.2) | 270 (50.5) |
| 0.80 (0.59 - 1.08) | 0.1458 | 1.56 (0.80 - 3.06)  | 0.1953 | 323 (59.9) | 188 (34.9) |
| 1.23 (0.90 - 1.67) | 0.2021 | 0.88 (0.41 - 1.87)  | 0.7373 | 373 (69.1) | 159 (29.4) |
| 0.95 (0.70 - 1.29) | 0.7468 | 1.23 (0.55 - 2.78)  | 0.6119 | 366 (68.2) | 161 (30.0) |
| 1.14 (0.85 - 1.51) | 0.3775 | 1.40 (0.85 - 2.30)  | 0.1875 | 250 (46.6) | 242 (45.1) |
| 1.06 (0.71 - 1.59) | 0.7661 | 0.24 (0.02 - 2.55)  | 0.2372 | 442 (82.0) | 94 (17.4)  |
| 1.07 (0.80 - 1.43) | 0.6382 | 1.38 (0.83 - 2.31)  | 0.2187 | 268 (49.6) | 231 (42.8) |
| 1.07 (0.70 - 1.62) | 0.7625 | 0.47 (0.04 - 5.88)  | 0.5607 | 450 (84.0) | 83 (15.5)  |
| 1.00 (0.72 - 1.38) | 0.9781 | 2.41 (0.92 - 6.33)  | 0.0739 | 393 (72.9) | 137 (25.4) |
| 0.96 (0.71 - 1.31) | 0.8125 | 1.25 (0.77 - 2.06)  | 0.3683 | 274 (50.9) | 218 (40.5) |
| 0.91 (0.65 - 1.27) | 0.5675 | 0.93 (0.26 - 3.33)  | 0.9118 | 425 (79.6) | 102 (19.1) |
| 1.11 (0.82 - 1.50) | 0.5125 | 1.08 (0.41 - 2.86)  | 0.8805 | 376 (69.6) | 150 (27.8) |
| 1.59 (1.09 - 2.32) | 0.0172 | 2.47 (0.60 - 10.08) | 0.2084 | 434 (80.8) | 99 (18.4)  |
| 1.06 (0.77 - 1.46) | 0.729  | 1.14 (0.81 - 1.60)  | 0.4399 | 122 (22.7) | 279 (51.9) |
| 0.99 (0.75 - 1.32) | 0.9654 | 1.18 (0.78 - 1.77)  | 0.4421 | 220 (40.8) | 248 (46.0) |
| 0.97 (0.70 - 1.34) | 0.8311 | 1.09 (0.76 - 1.57)  | 0.627  | 149 (27.6) | 282 (52.2) |
| 1.07 (0.79 - 1.45) | 0.6479 | 1.89 (0.93 - 3.84)  | 0.0806 | 360 (66.7) | 164 (30.4) |
| 0.94 (0.71 - 1.26) | 0.6931 | 1.17 (0.72 - 1.90)  | 0.5139 | 274 (50.8) | 225 (41.7) |
| 1.14 (0.84 - 1.53) | 0.4055 | 1.37 (0.74 - 2.53)  | 0.3114 | 307 (57.2) | 196 (36.5) |
| 1.34 (0.98 - 1.83) | 0.0647 | 1.54 (0.80 - 2.98)  | 0.1976 | 328 (61.3) | 187 (35.0) |
| 0.96 (0.67 - 1.36) | 0.8053 | 0.84 (0.28 - 2.58)  | 0.766  | 414 (77.2) | 109 (20.3) |
| 0.95 (0.68 - 1.34) | 0.7784 | 1.76 (0.77 - 3.99)  | 0.1775 | 374 (69.4) | 153 (28.4) |
| 0.78 (0.51 - 1.18) | 0.2413 | 0.47 (0.04 - 5.84)  | 0.5563 | 467 (87.0) | 67 (12.5)  |
| 1.27 (0.94 - 1.72) | 0.1254 | 1.26 (0.66 - 2.44)  | 0.4849 | 331 (61.4) | 181 (33.6) |
| 1.05 (0.78 - 1.40) | 0.7689 | 1.00 (0.65 - 1.56)  | 0.9849 | 255 (47.5) | 222 (41.3) |
| 0.95 (0.71 - 1.27) | 0.7435 | 1.48 (0.80 - 2.76)  | 0.2123 | 328 (61.2) | 183 (34.1) |
| 1.04 (0.77 - 1.39) | 0.8107 | 1.47 (0.72 - 3.02)  | 0.2917 | 368 (68.3) | 154 (28.6) |
| 0.68 (0.42 - 1.10) | 0.114  | 0.15 (0.02 - 1.32)  | 0.0874 | 485 (90.3) | 48 (8.9)   |
| 1.20 (0.91 - 1.58) | 0.2065 | 1.25 (0.79 - 1.96)  | 0.3425 | 249 (46.3) | 221 (41.1) |
| 0.70 (0.45 - 1.09) | 0.111  | 0.00 (0.00 - )      | 0.9857 | 490 (90.9) | 44 (8.2)   |
| 1.09 (0.81 - 1.46) | 0.5862 | 1.36 (0.79 - 2.31)  | 0.2639 | 297 (55.3) | 200 (37.2) |
| 1.07 (0.67 - 1.72) | 0.7702 | 1.04 (0.05 - 21.23) | 0.9811 | 469 (86.9) | 70 (13.0)  |
| 0.72 (0.46 - 1.13) | 0.1576 | 1480453 (0.00 - )   | 0.9813 | 470 (87.0) | 69 (12.8)  |
| 1.03 (0.65 - 1.62) | 0.9045 | 5.93 (0.68 - 51.84) | 0.1079 | 451 (83.5) | 86 (15.9)  |
| 1.00 (0.68 - 1.46) | 0.9874 | 1.00 (0.14 - 7.13)  | 0.9964 | 466 (86.8) | 68 (12.7)  |
| 0.71 (0.46 - 1.12) | 0.1397 | 1.01 (0.06 - 16.16) | 0.9942 | 476 (88.5) | 61 (11.3)  |
| 1.07 (0.78 - 1.48) | 0.6697 | 1.35 (0.42 - 4.33)  | 0.6186 | 403 (74.8) | 130 (24.1) |
| 1.32 (0.92 - 1.89) | 0.1315 | 3.65 (1.00 - 13.38) | 0.0503 | 430 (80.1) | 106 (19.7) |
| 1.23 (0.85 - 1.79) | 0.2735 | 0.49 (0.12 - 2.02)  | 0.3243 | 418 (77.4) | 119 (22.0) |
| 1.24 (0.91 - 1.71) | 0.1791 | 0.73 (0.33 - 1.61)  | 0.4374 | 380 (70.5) | 154 (28.6) |
| 1.05 (0.75 - 1.47) | 0.7712 | 2.67 (0.72 - 9.93)  | 0.1441 | 414 (76.8) | 118 (21.9) |
| 1.29 (0.87 - 1.90) | 0.2071 | 1.00 (0.25 - 3.99)  | 0.9977 | 438 (81.3) | 94 (17.4)  |
| 0.97 (0.72 - 1.30) | 0.8401 | 1.04 (0.73 - 1.48)  | 0.833  | 152 (28.3) | 259 (48.1) |
| 1.12 (0.77 - 1.62) | 0.5668 | 1.16 (0.31 - 4.39)  | 0.8224 | 438 (81.3) | 99 (18.4)  |
| 1.07 (0.79 - 1.44) | 0.6665 | 0.90 (0.64 - 1.26)  | 0.5401 | 183 (34.0) | 270 (50.2) |
| 1.16 (0.77 - 1.75) | 0.4862 | 1.78 (0.29 - 10.97) | 0.5364 | 472 (87.4) | 66 (12.2)  |
| 1.03 (0.74 - 1.42) | 0.8724 | 1.40 (0.56 - 3.51)  | 0.4729 | 387 (72.6) | 135 (25.3) |
| 1.03 (0.76 - 1.40) | 0.8392 | 0.91 (0.65 - 1.27)  | 0.5703 | 186 (35.0) | 262 (49.3) |

|                    |        |                     |        |            |            |
|--------------------|--------|---------------------|--------|------------|------------|
| 1.07 (0.73 - 1.59) | 0.7173 | 0.22 (0.03 - 1.89)  | 0.1667 | 439 (81.4) | 92 (17.1)  |
| 1.03 (0.77 - 1.37) | 0.8427 | 1.10 (0.77 - 1.56)  | 0.5959 | 161 (29.9) | 278 (51.7) |
| 1.08 (0.81 - 1.44) | 0.6159 | 0.76 (0.44 - 1.32)  | 0.337  | 302 (56.1) | 190 (35.3) |
| 0.97 (0.72 - 1.31) | 0.8483 | 0.80 (0.53 - 1.20)  | 0.2746 | 212 (39.5) | 228 (42.5) |
| 0.97 (0.69 - 1.36) | 0.8601 | 0.88 (0.65 - 1.20)  | 0.4128 | 147 (27.3) | 265 (49.3) |
| 1.07 (0.81 - 1.42) | 0.639  | 0.82 (0.53 - 1.29)  | 0.3984 | 250 (46.4) | 222 (41.2) |
| 1.21 (0.82 - 1.77) | 0.3391 | 0.87 (0.23 - 3.29)  | 0.8411 | 435 (80.7) | 97 (18.0)  |
| 1.14 (0.71 - 1.85) | 0.5878 | 531357.7 (0.00 - )  | 0.9857 | 471 (88.0) | 64 (12.0)  |
| 1.04 (0.69 - 1.57) | 0.8585 | 1.30 (0.21 - 7.97)  | 0.7757 | 449 (84.1) | 84 (15.7)  |
| 1.07 (0.68 - 1.69) | 0.7771 | 0.82 (0.11 - 6.04)  | 0.8469 | 474 (88.1) | 64 (11.9)  |
| 1.04 (0.78 - 1.38) | 0.789  | 0.77 (0.46 - 1.27)  | 0.301  | 289 (53.6) | 196 (36.4) |
| 0.80 (0.59 - 1.08) | 0.1442 | 1.07 (0.61 - 1.87)  | 0.813  | 282 (52.4) | 226 (42.0) |
| 0.95 (0.60 - 1.50) | 0.8206 | 0.65 (0.11 - 3.92)  | 0.6412 | 466 (86.5) | 72 (13.4)  |
| 0.83 (0.62 - 1.11) | 0.2089 | 1.24 (0.69 - 2.25)  | 0.4708 | 325 (60.2) | 188 (34.8) |
| 0.85 (0.48 - 1.49) | 0.568  | 1.07 (0.07 - 17.31) | 0.9599 | 500 (93.1) | 36 (6.7)   |
| 0.97 (0.73 - 1.30) | 0.8485 | 0.98 (0.66 - 1.45)  | 0.9189 | 218 (40.4) | 255 (47.3) |
| 1.24 (0.83 - 1.86) | 0.3017 | 3.38 (0.33 - 34.52) | 0.3051 | 450 (83.3) | 85 (15.7)  |
| 1.18 (0.80 - 1.75) | 0.4114 | 0.54 (0.13 - 2.16)  | 0.3799 | 432 (80.3) | 103 (19.1) |
| 0.80 (0.57 - 1.12) | 0.1922 | 1.33 (0.91 - 1.94)  | 0.1414 | 149 (27.7) | 264 (49.1) |
| 1.64 (1.16 - 2.32) | 0.0048 | 1.91 (0.77 - 4.69)  | 0.1605 | 368 (68.4) | 155 (28.8) |
| 1.67 (1.21 - 2.32) | 0.0019 | 1.02 (0.48 - 2.18)  | 0.9535 | 319 (60.1) | 187 (35.2) |
| 1.53 (1.11 - 2.12) | 0.0102 | 1.67 (0.86 - 3.23)  | 0.1306 | 310 (57.5) | 193 (35.8) |
| 1.02 (0.75 - 1.38) | 0.9141 | 0.83 (0.49 - 1.42)  | 0.5023 | 279 (51.8) | 217 (40.3) |
| 0.87 (0.66 - 1.16) | 0.3515 | 1.19 (0.68 - 2.08)  | 0.5518 | 299 (55.5) | 196 (36.4) |
| 0.96 (0.72 - 1.29) | 0.806  | 1.22 (0.79 - 1.88)  | 0.3638 | 206 (38.3) | 260 (48.3) |
| 0.95 (0.55 - 1.63) | 0.8539 | 4.38 (0.46 - 41.35) | 0.1976 | 488 (90.4) | 52 (9.6)   |
| 1.35 (0.97 - 1.87) | 0.0732 | 1.07 (0.73 - 1.58)  | 0.7258 | 185 (34.3) | 276 (51.1) |
| 0.91 (0.68 - 1.21) | 0.5151 | 1.02 (0.61 - 1.70)  | 0.9545 | 293 (54.5) | 198 (36.8) |
| 0.98 (0.72 - 1.32) | 0.8827 | 0.59 (0.30 - 1.14)  | 0.1159 | 326 (60.7) | 187 (34.8) |
| 1.70 (1.20 - 2.41) | 0.0031 | 1.67 (0.67 - 4.20)  | 0.2741 | 367 (68.5) | 152 (28.4) |
| 1.37 (1.01 - 1.86) | 0.0457 | 0.83 (0.42 - 1.61)  | 0.5722 | 318 (59.0) | 196 (36.4) |
| 1.65 (1.20 - 2.27) | 0.0022 | 2.01 (0.91 - 4.43)  | 0.0838 | 330 (61.7) | 181 (33.8) |
| 1.93 (1.33 - 2.79) | 0.0005 | 1.66 (0.56 - 4.92)  | 0.3637 | 386 (72.1) | 134 (25.0) |
| 1.77 (1.24 - 2.54) | 0.0019 | 1.79 (0.67 - 4.78)  | 0.2459 | 371 (69.0) | 148 (27.5) |
| 1.19 (0.69 - 2.06) | 0.528  | ( - )               | --     | 494 (91.8) | 42 (7.8)   |
| 0.79 (0.52 - 1.20) | 0.264  | 0.65 (0.06 - 7.54)  | 0.7305 | 466 (86.5) | 69 (12.8)  |

| Age>Q2<br>Genotype n(%)<br>2/2<br>Cases | Age>Q2<br>Genotype n(%)<br>1/1<br>Controls | Age>Q2<br>Genotype n(%)<br>1/2<br>Controls | Age>Q2<br>Genotype n(%)<br>2/2<br>Controls | PD susceptibility:<br>Age>Q2<br>Trend Model<br>OR (95%CI) | PD susceptibility:<br>Age>Q2<br>Trend P-value |
|-----------------------------------------|--------------------------------------------|--------------------------------------------|--------------------------------------------|-----------------------------------------------------------|-----------------------------------------------|
| 69 (13.4)                               | 204 (39.7)                                 | 244 (47.5)                                 | 66 (12.8)                                  | 1.02 (0.82 - 1.27)                                        | 0.834                                         |
| 96 (17.9)                               | 171 (32.0)                                 | 262 (49.0)                                 | 102 (19.1)                                 | 0.90 (0.74 - 1.10)                                        | 0.3062                                        |
| 6 (1.1)                                 | 436 (80.9)                                 | 96 (17.8)                                  | 7 (1.3)                                    | 0.84 (0.60 - 1.18)                                        | 0.3238                                        |
| 0 (0.0)                                 | 494 (92.7)                                 | 38 (7.1)                                   | 1 (0.2)                                    | 1.60 (0.93 - 2.76)                                        | 0.0912                                        |
| 117 (21.8)                              | 139 (25.9)                                 | 275 (51.3)                                 | 122 (22.8)                                 | 0.91 (0.74 - 1.11)                                        | 0.3522                                        |
| 92 (17.1)                               | 182 (33.8)                                 | 264 (49.0)                                 | 93 (17.3)                                  | 1.05 (0.86 - 1.28)                                        | 0.6545                                        |
| 103 (19.1)                              | 156 (28.9)                                 | 275 (51.0)                                 | 108 (20.0)                                 | 1.04 (0.85 - 1.27)                                        | 0.7049                                        |
| 10 (1.9)                                | 415 (77.7)                                 | 113 (21.2)                                 | 6 (1.1)                                    | 1.10 (0.82 - 1.47)                                        | 0.543                                         |
| 90 (16.7)                               | 176 (32.7)                                 | 274 (50.9)                                 | 88 (16.4)                                  | 0.90 (0.73 - 1.10)                                        | 0.2912                                        |
| 104 (19.3)                              | 156 (29.0)                                 | 275 (51.1)                                 | 107 (19.9)                                 | 1.05 (0.86 - 1.28)                                        | 0.6283                                        |
| 2 (0.4)                                 | 487 (90.7)                                 | 50 (9.3)                                   | 0 (0.0)                                    | 1.06 (0.66 - 1.68)                                        | 0.8173                                        |
| 6 (1.1)                                 | 422 (78.4)                                 | 103 (19.1)                                 | 13 (2.4)                                   | 1.26 (0.93 - 1.73)                                        | 0.1385                                        |
| 2 (0.4)                                 | 428 (80.0)                                 | 104 (19.4)                                 | 3 (0.6)                                    | 1.15 (0.80 - 1.65)                                        | 0.4489                                        |
| 28 (5.2)                                | 304 (56.6)                                 | 205 (38.2)                                 | 28 (5.2)                                   | 1.03 (0.82 - 1.30)                                        | 0.7994                                        |
| 4 (0.7)                                 | 464 (86.1)                                 | 73 (13.5)                                  | 2 (0.4)                                    | 1.14 (0.76 - 1.70)                                        | 0.5314                                        |
| 8 (1.5)                                 | 423 (78.6)                                 | 109 (20.3)                                 | 6 (1.1)                                    | 1.15 (0.85 - 1.56)                                        | 0.3755                                        |
| 23 (4.3)                                | 378 (70.3)                                 | 147 (27.3)                                 | 13 (2.4)                                   | 1.08 (0.83 - 1.40)                                        | 0.5669                                        |
| 44 (8.2)                                | 285 (53.1)                                 | 221 (41.2)                                 | 31 (5.8)                                   | 1.08 (0.86 - 1.36)                                        | 0.4876                                        |
| 20 (3.7)                                | 371 (68.8)                                 | 154 (28.6)                                 | 14 (2.6)                                   | 1.12 (0.88 - 1.45)                                        | 0.3587                                        |
| 132 (24.4)                              | 150 (27.8)                                 | 278 (51.5)                                 | 112 (20.7)                                 | 1.15 (0.95 - 1.40)                                        | 0.1573                                        |
| 2 (0.4)                                 | 478 (88.8)                                 | 60 (11.2)                                  | 0 (0.0)                                    | 1.07 (0.69 - 1.65)                                        | 0.7669                                        |
| 124 (23.2)                              | 140 (26.2)                                 | 264 (49.3)                                 | 131 (24.5)                                 | 0.93 (0.76 - 1.13)                                        | 0.4744                                        |
| 3 (0.6)                                 | 427 (79.2)                                 | 106 (19.7)                                 | 6 (1.1)                                    | 0.66 (0.47 - 0.92)                                        | 0.0156                                        |
| 98 (18.2)                               | 160 (29.7)                                 | 277 (51.5)                                 | 101 (18.8)                                 | 0.91 (0.74 - 1.12)                                        | 0.3709                                        |
| 34 (6.3)                                | 300 (55.7)                                 | 204 (37.8)                                 | 35 (6.5)                                   | 1.01 (0.81 - 1.27)                                        | 0.904                                         |
| 15 (2.8)                                | 391 (72.7)                                 | 133 (24.7)                                 | 14 (2.6)                                   | 1.17 (0.90 - 1.53)                                        | 0.24                                          |
| 66 (12.3)                               | 242 (45.1)                                 | 242 (45.1)                                 | 53 (9.9)                                   | 1.05 (0.85 - 1.30)                                        | 0.6496                                        |
| 21 (3.9)                                | 330 (61.7)                                 | 185 (34.6)                                 | 20 (3.7)                                   | 0.98 (0.76 - 1.26)                                        | 0.8825                                        |
| 36 (6.7)                                | 287 (53.3)                                 | 214 (39.8)                                 | 37 (6.9)                                   | 0.90 (0.72 - 1.14)                                        | 0.381                                         |
| 129 (24.0)                              | 133 (24.7)                                 | 273 (50.7)                                 | 132 (24.5)                                 | 0.93 (0.76 - 1.14)                                        | 0.5111                                        |
| 76 (14.1)                               | 205 (38.0)                                 | 252 (46.8)                                 | 82 (15.2)                                  | 1.11 (0.90 - 1.38)                                        | 0.3194                                        |
| 13 (2.4)                                | 346 (64.2)                                 | 180 (33.4)                                 | 13 (2.4)                                   | 0.91 (0.69 - 1.19)                                        | 0.4824                                        |
| 61 (11.4)                               | 215 (40.0)                                 | 258 (48.0)                                 | 64 (11.9)                                  | 0.85 (0.69 - 1.05)                                        | 0.1297                                        |
| 11 (2.0)                                | 383 (71.2)                                 | 140 (26.0)                                 | 15 (2.8)                                   | 0.75 (0.57 - 1.00)                                        | 0.0485                                        |
| 25 (4.6)                                | 332 (61.6)                                 | 191 (35.4)                                 | 16 (3.0)                                   | 1.01 (0.79 - 1.30)                                        | 0.9176                                        |
| 6 (1.1)                                 | 480 (90.4)                                 | 45 (8.5)                                   | 6 (1.1)                                    | 1.00 (0.67 - 1.49)                                        | 0.9878                                        |
| 9 (1.7)                                 | 446 (82.6)                                 | 91 (16.9)                                  | 3 (0.6)                                    | 1.19 (0.85 - 1.66)                                        | 0.3082                                        |
| 7 (1.3)                                 | 451 (83.5)                                 | 82 (15.2)                                  | 7 (1.3)                                    | 1.43 (1.01 - 2.02)                                        | 0.0442                                        |
| 2 (0.4)                                 | 456 (85.2)                                 | 72 (13.5)                                  | 7 (1.3)                                    | 0.74 (0.50 - 1.10)                                        | 0.1358                                        |
| 1 (0.2)                                 | 511 (94.8)                                 | 27 (5.0)                                   | 1 (0.2)                                    | 0.91 (0.50 - 1.65)                                        | 0.7584                                        |
| 1 (0.2)                                 | 452 (83.9)                                 | 85 (15.8)                                  | 2 (0.4)                                    | 0.93 (0.65 - 1.34)                                        | 0.7087                                        |
| 49 (9.1)                                | 252 (47.0)                                 | 226 (42.2)                                 | 58 (10.8)                                  | 0.94 (0.76 - 1.17)                                        | 0.6085                                        |
| 15 (2.8)                                | 345 (64.2)                                 | 173 (32.2)                                 | 19 (3.5)                                   | 0.91 (0.71 - 1.16)                                        | 0.4429                                        |
| 86 (16.1)                               | 171 (32.0)                                 | 267 (49.9)                                 | 97 (18.1)                                  | 0.81 (0.65 - 1.00)                                        | 0.045                                         |
| 115 (21.4)                              | 167 (31.1)                                 | 258 (48.0)                                 | 112 (20.9)                                 | 1.12 (0.92 - 1.37)                                        | 0.2579                                        |
| 33 (6.1)                                | 301 (55.8)                                 | 204 (37.8)                                 | 34 (6.3)                                   | 0.99 (0.78 - 1.27)                                        | 0.9522                                        |
| 38 (7.1)                                | 268 (49.9)                                 | 220 (41.0)                                 | 49 (9.1)                                   | 0.98 (0.78 - 1.23)                                        | 0.8618                                        |
| 2 (0.4)                                 | 408 (76.1)                                 | 118 (22.0)                                 | 10 (1.9)                                   | 1.05 (0.78 - 1.42)                                        | 0.7401                                        |

|            |            |            |            |                    |        |
|------------|------------|------------|------------|--------------------|--------|
| 9 (1.7)    | 407 (75.8) | 117 (21.8) | 13 (2.4)   | 1.06 (0.80 - 1.39) | 0.7007 |
| 33 (6.1)   | 286 (53.2) | 205 (38.1) | 47 (8.7)   | 0.89 (0.71 - 1.11) | 0.304  |
| 22 (4.1)   | 325 (60.3) | 189 (35.1) | 25 (4.6)   | 1.02 (0.79 - 1.31) | 0.8969 |
| 19 (3.5)   | 319 (59.2) | 193 (35.8) | 27 (5.0)   | 0.88 (0.69 - 1.12) | 0.3105 |
| 54 (10.0)  | 272 (50.6) | 212 (39.4) | 54 (10.0)  | 1.02 (0.82 - 1.26) | 0.8879 |
| 98 (18.3)  | 171 (32.0) | 270 (50.5) | 94 (17.6)  | 1.05 (0.85 - 1.29) | 0.6695 |
| 28 (5.2)   | 314 (58.3) | 197 (36.5) | 28 (5.2)   | 0.92 (0.72 - 1.18) | 0.5326 |
| 8 (1.5)    | 365 (67.6) | 151 (28.0) | 24 (4.4)   | 0.82 (0.62 - 1.08) | 0.1511 |
| 10 (1.9)   | 374 (69.6) | 147 (27.4) | 16 (3.0)   | 1.05 (0.80 - 1.37) | 0.7286 |
| 44 (8.2)   | 238 (44.4) | 242 (45.1) | 56 (10.4)  | 0.88 (0.70 - 1.10) | 0.2631 |
| 3 (0.6)    | 425 (78.8) | 114 (21.2) | 0 (0.0)    | 0.77 (0.53 - 1.10) | 0.1456 |
| 41 (7.6)   | 267 (49.4) | 224 (41.5) | 49 (9.1)   | 0.98 (0.78 - 1.22) | 0.8355 |
| 3 (0.6)    | 436 (81.3) | 100 (18.7) | 0 (0.0)    | 0.78 (0.54 - 1.14) | 0.2019 |
| 9 (1.7)    | 396 (73.5) | 130 (24.1) | 13 (2.4)   | 1.02 (0.77 - 1.35) | 0.9046 |
| 46 (8.6)   | 254 (47.2) | 223 (41.4) | 61 (11.3)  | 0.81 (0.65 - 1.01) | 0.0587 |
| 7 (1.3)    | 408 (76.4) | 119 (22.3) | 7 (1.3)    | 0.84 (0.62 - 1.14) | 0.2598 |
| 14 (2.6)   | 354 (65.6) | 169 (31.3) | 17 (3.1)   | 0.77 (0.59 - 1.01) | 0.0562 |
| 4 (0.7)    | 449 (83.6) | 80 (14.9)  | 8 (1.5)    | 1.23 (0.87 - 1.73) | 0.2429 |
| 137 (25.5) | 153 (28.4) | 243 (45.2) | 142 (26.4) | 1.16 (0.95 - 1.43) | 0.1506 |
| 71 (13.2)  | 236 (43.8) | 235 (43.6) | 68 (12.6)  | 1.11 (0.90 - 1.38) | 0.3287 |
| 109 (20.2) | 163 (30.2) | 249 (46.1) | 128 (23.7) | 0.99 (0.81 - 1.21) | 0.9311 |
| 16 (3.0)   | 353 (65.4) | 162 (30.0) | 25 (4.6)   | 0.90 (0.70 - 1.15) | 0.3824 |
| 40 (7.4)   | 267 (49.5) | 215 (39.9) | 57 (10.6)  | 0.88 (0.71 - 1.09) | 0.2316 |
| 34 (6.3)   | 289 (53.8) | 207 (38.5) | 41 (7.6)   | 0.85 (0.67 - 1.07) | 0.1689 |
| 20 (3.7)   | 323 (60.4) | 187 (35.0) | 25 (4.7)   | 0.91 (0.70 - 1.19) | 0.4953 |
| 13 (2.4)   | 393 (73.3) | 131 (24.4) | 12 (2.2)   | 0.77 (0.57 - 1.05) | 0.0962 |
| 12 (2.2)   | 400 (74.2) | 125 (23.2) | 14 (2.6)   | 1.32 (0.98 - 1.79) | 0.0657 |
| 3 (0.6)    | 456 (84.9) | 76 (14.2)  | 5 (0.9)    | 0.78 (0.53 - 1.15) | 0.2057 |
| 27 (5.0)   | 317 (58.8) | 186 (34.5) | 36 (6.7)   | 0.86 (0.68 - 1.09) | 0.2094 |
| 60 (11.2)  | 238 (44.3) | 219 (40.8) | 80 (14.9)  | 0.83 (0.67 - 1.02) | 0.082  |
| 25 (4.7)   | 320 (59.7) | 189 (35.3) | 27 (5.0)   | 0.92 (0.72 - 1.18) | 0.5097 |
| 17 (3.2)   | 352 (65.3) | 165 (30.6) | 22 (4.1)   | 0.83 (0.64 - 1.08) | 0.1665 |
| 4 (0.7)    | 477 (88.8) | 56 (10.4)  | 4 (0.7)    | 0.85 (0.56 - 1.30) | 0.4588 |
| 68 (12.6)  | 224 (41.6) | 249 (46.3) | 65 (12.1)  | 0.88 (0.72 - 1.09) | 0.2468 |
| 5 (0.9)    | 491 (91.1) | 46 (8.5)   | 2 (0.4)    | 1.11 (0.73 - 1.70) | 0.6277 |
| 40 (7.4)   | 293 (54.6) | 200 (37.2) | 44 (8.2)   | 0.94 (0.74 - 1.20) | 0.6168 |
| 1 (0.2)    | 462 (85.6) | 78 (14.4)  | 0 (0.0)    | 0.87 (0.58 - 1.31) | 0.5038 |
| 1 (0.2)    | 489 (90.6) | 49 (9.1)   | 2 (0.4)    | 1.63 (1.05 - 2.53) | 0.0298 |
| 3 (0.6)    | 473 (87.6) | 64 (11.9)  | 3 (0.6)    | 1.56 (1.02 - 2.40) | 0.0413 |
| 3 (0.6)    | 460 (85.7) | 71 (13.2)  | 6 (1.1)    | 0.84 (0.57 - 1.23) | 0.3666 |
| 1 (0.2)    | 468 (87.0) | 67 (12.5)  | 3 (0.6)    | 0.79 (0.52 - 1.21) | 0.2826 |
| 6 (1.1)    | 390 (72.4) | 139 (25.8) | 10 (1.9)   | 0.84 (0.63 - 1.12) | 0.2439 |
| 1 (0.2)    | 442 (82.3) | 87 (16.2)  | 8 (1.5)    | 1.11 (0.80 - 1.54) | 0.5456 |
| 3 (0.6)    | 417 (77.2) | 113 (20.9) | 10 (1.9)   | 0.91 (0.67 - 1.25) | 0.574  |
| 5 (0.9)    | 392 (72.7) | 133 (24.7) | 14 (2.6)   | 1.09 (0.83 - 1.45) | 0.5289 |
| 7 (1.3)    | 412 (76.4) | 113 (21.0) | 14 (2.6)   | 0.91 (0.68 - 1.22) | 0.5409 |
| 7 (1.3)    | 458 (85.0) | 76 (14.1)  | 5 (0.9)    | 1.40 (0.99 - 1.98) | 0.0543 |
| 127 (23.6) | 155 (28.8) | 266 (49.4) | 117 (21.7) | 1.07 (0.88 - 1.31) | 0.4773 |
| 2 (0.4)    | 440 (81.6) | 93 (17.3)  | 6 (1.1)    | 0.92 (0.65 - 1.31) | 0.6515 |
| 85 (15.8)  | 181 (33.6) | 267 (49.6) | 90 (16.7)  | 0.97 (0.79 - 1.19) | 0.787  |
| 2 (0.4)    | 465 (86.1) | 69 (12.8)  | 6 (1.1)    | 0.83 (0.57 - 1.20) | 0.3243 |
| 11 (2.1)   | 404 (75.8) | 119 (22.3) | 10 (1.9)   | 1.19 (0.89 - 1.60) | 0.2354 |
| 83 (15.6)  | 184 (34.7) | 261 (49.2) | 86 (16.2)  | 0.98 (0.80 - 1.21) | 0.8854 |

|            |            |            |            |                    |        |
|------------|------------|------------|------------|--------------------|--------|
| 8 (1.5)    | 444 (82.4) | 90 (16.7)  | 5 (0.9)    | 1.18 (0.84 - 1.65) | 0.3437 |
| 99 (18.4)  | 166 (30.9) | 263 (48.9) | 109 (20.3) | 0.96 (0.79 - 1.17) | 0.6961 |
| 46 (8.6)   | 276 (51.3) | 215 (40.0) | 47 (8.7)   | 0.85 (0.69 - 1.05) | 0.1357 |
| 97 (18.1)  | 192 (35.8) | 256 (47.7) | 89 (16.6)  | 0.95 (0.78 - 1.15) | 0.5843 |
| 126 (23.4) | 151 (28.1) | 261 (48.5) | 126 (23.4) | 1.01 (0.83 - 1.23) | 0.9035 |
| 67 (12.4)  | 226 (41.9) | 245 (45.5) | 68 (12.6)  | 0.87 (0.72 - 1.07) | 0.1831 |
| 7 (1.3)    | 456 (84.6) | 78 (14.5)  | 5 (0.9)    | 1.41 (1.00 - 1.99) | 0.051  |
| 0 (0.0)    | 468 (87.5) | 64 (12.0)  | 3 (0.6)    | 0.85 (0.56 - 1.31) | 0.4683 |
| 1 (0.2)    | 454 (85.0) | 77 (14.4)  | 3 (0.6)    | 1.04 (0.71 - 1.52) | 0.857  |
| 0 (0.0)    | 476 (88.5) | 60 (11.2)  | 2 (0.4)    | 0.97 (0.62 - 1.50) | 0.8794 |
| 54 (10.0)  | 258 (47.9) | 225 (41.7) | 56 (10.4)  | 0.84 (0.68 - 1.03) | 0.0915 |
| 30 (5.6)   | 278 (51.7) | 230 (42.8) | 30 (5.6)   | 0.96 (0.77 - 1.21) | 0.7559 |
| 1 (0.2)    | 474 (87.9) | 62 (11.5)  | 3 (0.6)    | 1.16 (0.78 - 1.70) | 0.4639 |
| 27 (5.0)   | 326 (60.4) | 181 (33.5) | 33 (6.1)   | 0.99 (0.78 - 1.24) | 0.9004 |
| 1 (0.2)    | 490 (91.2) | 46 (8.6)   | 1 (0.2)    | 0.70 (0.43 - 1.15) | 0.1549 |
| 66 (12.2)  | 224 (41.6) | 247 (45.8) | 68 (12.6)  | 1.03 (0.84 - 1.26) | 0.7755 |
| 5 (0.9)    | 445 (82.4) | 94 (17.4)  | 1 (0.2)    | 0.98 (0.68 - 1.41) | 0.9265 |
| 3 (0.6)    | 433 (80.5) | 100 (18.6) | 5 (0.9)    | 1.02 (0.74 - 1.40) | 0.9178 |
| 125 (23.2) | 149 (27.7) | 269 (50.0) | 120 (22.3) | 1.02 (0.84 - 1.24) | 0.833  |
| 15 (2.8)   | 400 (74.3) | 121 (22.5) | 17 (3.2)   | 1.24 (0.94 - 1.63) | 0.1303 |
| 25 (4.7)   | 353 (66.5) | 157 (29.6) | 21 (4.0)   | 1.27 (0.98 - 1.63) | 0.0693 |
| 36 (6.7)   | 339 (62.9) | 168 (31.2) | 32 (5.9)   | 1.23 (0.96 - 1.57) | 0.095  |
| 43 (8.0)   | 262 (48.6) | 237 (44.0) | 40 (7.4)   | 0.91 (0.73 - 1.14) | 0.4223 |
| 44 (8.2)   | 299 (55.5) | 202 (37.5) | 38 (7.1)   | 1.06 (0.85 - 1.32) | 0.6259 |
| 72 (13.4)  | 211 (39.2) | 260 (48.3) | 67 (12.5)  | 1.05 (0.86 - 1.29) | 0.6    |
| 0 (0.0)    | 491 (90.9) | 48 (8.9)   | 1 (0.2)    | 1.01 (0.63 - 1.61) | 0.9813 |
| 79 (14.6)  | 201 (37.2) | 255 (47.2) | 84 (15.6)  | 1.04 (0.84 - 1.28) | 0.7413 |
| 47 (8.7)   | 279 (51.9) | 213 (39.6) | 46 (8.6)   | 0.91 (0.73 - 1.14) | 0.4129 |
| 24 (4.5)   | 325 (60.5) | 192 (35.8) | 20 (3.7)   | 1.03 (0.81 - 1.31) | 0.8088 |
| 17 (3.2)   | 399 (74.4) | 121 (22.6) | 16 (3.0)   | 1.29 (0.98 - 1.71) | 0.0735 |
| 25 (4.6)   | 352 (65.3) | 155 (28.8) | 32 (5.9)   | 1.13 (0.89 - 1.44) | 0.3135 |
| 24 (4.5)   | 359 (67.1) | 152 (28.4) | 24 (4.5)   | 1.20 (0.93 - 1.54) | 0.1548 |
| 15 (2.8)   | 417 (77.9) | 105 (19.6) | 13 (2.4)   | 1.31 (0.98 - 1.76) | 0.0709 |
| 19 (3.5)   | 410 (76.2) | 112 (20.8) | 16 (3.0)   | 1.40 (1.05 - 1.86) | 0.02   |
| 2 (0.4)    | 491 (91.3) | 46 (8.6)   | 1 (0.2)    | 0.96 (0.59 - 1.56) | 0.8717 |
| 4 (0.7)    | 464 (86.1) | 67 (12.4)  | 8 (1.5)    | 0.88 (0.60 - 1.29) | 0.5096 |



| PD susceptibility:<br>Age>Q2<br>Dominant Model<br>OR (95%CI) | PD susceptibility:<br>Age>Q2<br>Dominant<br>P-value | PD susceptibility:<br>Age>Q2<br>Recessive Model<br>OR (95%CI) | PD susceptibility:<br>Age>Q2<br>Recessive<br>P-value | AAO_All<br>Genotype n(%)<br>1/1<br>Cases | AAO_All<br>Genotype n(%)<br>1/2<br>Cases |
|--------------------------------------------------------------|-----------------------------------------------------|---------------------------------------------------------------|------------------------------------------------------|------------------------------------------|------------------------------------------|
| 1.02 (0.77 - 1.37)                                           | 0.8698                                              | 1.03 (0.69 - 1.55)                                            | 0.8689                                               | 418 (38.8)                               | 497 (46.2)                               |
| 0.89 (0.67 - 1.19)                                           | 0.4331                                              | 0.86 (0.60 - 1.22)                                            | 0.3894                                               | 365 (33.5)                               | 520 (47.8)                               |
| 0.81 (0.55 - 1.18)                                           | 0.2671                                              | 1.02 (0.34 - 3.09)                                            | 0.9759                                               | 906 (83.1)                               | 176 (16.1)                               |
| 1.71 (0.98 - 3.00)                                           | 0.0606                                              | 0.00 (0.00 - )                                                | 0.9857                                               | 993 (91.4)                               | 93 (8.6)                                 |
| 0.89 (0.65 - 1.21)                                           | 0.4439                                              | 0.89 (0.63 - 1.25)                                            | 0.4886                                               | 294 (27.0)                               | 549 (50.4)                               |
| 1.06 (0.78 - 1.43)                                           | 0.7143                                              | 1.06 (0.76 - 1.49)                                            | 0.7227                                               | 379 (34.7)                               | 532 (48.8)                               |
| 1.10 (0.80 - 1.51)                                           | 0.5493                                              | 1.00 (0.72 - 1.38)                                            | 0.9972                                               | 322 (29.5)                               | 553 (50.7)                               |
| 1.05 (0.76 - 1.45)                                           | 0.7774                                              | 2.06 (0.67 - 6.31)                                            | 0.2076                                               | 827 (76.1)                               | 240 (22.1)                               |
| 0.80 (0.60 - 1.07)                                           | 0.1274                                              | 1.00 (0.70 - 1.44)                                            | 0.9918                                               | 383 (35.2)                               | 517 (47.5)                               |
| 1.10 (0.80 - 1.51)                                           | 0.5491                                              | 1.03 (0.74 - 1.42)                                            | 0.8673                                               | 322 (29.5)                               | 552 (50.6)                               |
| 1.01 (0.63 - 1.64)                                           | 0.954                                               | 908044.9 (0.00 - )                                            | 0.9869                                               | 978 (89.7)                               | 107 (9.8)                                |
| 1.45 (1.03 - 2.04)                                           | 0.0336                                              | 0.46 (0.16 - 1.33)                                            | 0.1492                                               | 823 (75.6)                               | 254 (23.3)                               |
| 1.20 (0.82 - 1.75)                                           | 0.3434                                              | 0.47 (0.07 - 3.05)                                            | 0.4265                                               | 870 (79.9)                               | 215 (19.7)                               |
| 1.05 (0.80 - 1.38)                                           | 0.7219                                              | 0.96 (0.50 - 1.83)                                            | 0.8919                                               | 610 (56.2)                               | 413 (38.0)                               |
| 1.10 (0.72 - 1.69)                                           | 0.6565                                              | 3.01 (0.31 - )                                                | 0.3406                                               | 916 (84.1)                               | 163 (15.0)                               |
| 1.12 (0.81 - 1.56)                                           | 0.4948                                              | 1.82 (0.55 - 6.00)                                            | 0.3267                                               | 830 (76.1)                               | 242 (22.2)                               |
| 0.98 (0.72 - 1.34)                                           | 0.908                                               | 1.95 (0.93 - 4.08)                                            | 0.075                                                | 744 (68.4)                               | 303 (27.8)                               |
| 1.01 (0.76 - 1.33)                                           | 0.9664                                              | 1.59 (0.90 - 2.82)                                            | 0.1126                                               | 583 (53.5)                               | 424 (38.9)                               |
| 1.08 (0.81 - 1.44)                                           | 0.5838                                              | 1.74 (0.78 - 3.90)                                            | 0.176                                                | 714 (65.6)                               | 335 (30.8)                               |
| 1.10 (0.81 - 1.50)                                           | 0.5388                                              | 1.30 (0.95 - 1.78)                                            | 0.0995                                               | 294 (26.9)                               | 535 (49.0)                               |
| 1.02 (0.66 - 1.60)                                           | 0.9144                                              | 1145681 (0.00 - )                                             | 0.987                                                | 960 (88.2)                               | 125 (11.5)                               |
| 0.97 (0.72 - 1.32)                                           | 0.8549                                              | 0.85 (0.61 - 1.18)                                            | 0.319                                                | 274 (25.3)                               | 544 (50.1)                               |
| 0.64 (0.45 - 0.93)                                           | 0.0173                                              | 0.53 (0.13 - 2.14)                                            | 0.3682                                               | 907 (83.2)                               | 170 (15.6)                               |
| 0.87 (0.65 - 1.17)                                           | 0.3603                                              | 0.92 (0.64 - 1.33)                                            | 0.6612                                               | 348 (31.9)                               | 541 (49.6)                               |
| 1.01 (0.76 - 1.34)                                           | 0.9264                                              | 1.03 (0.61 - 1.75)                                            | 0.9134                                               | 621 (57.1)                               | 407 (37.4)                               |
| 1.20 (0.89 - 1.62)                                           | 0.2248                                              | 1.14 (0.48 - 2.73)                                            | 0.7669                                               | 746 (68.5)                               | 315 (28.9)                               |
| 0.95 (0.72 - 1.26)                                           | 0.7331                                              | 1.37 (0.89 - 2.12)                                            | 0.1524                                               | 495 (45.5)                               | 471 (43.3)                               |
| 0.98 (0.73 - 1.30)                                           | 0.8748                                              | 0.99 (0.48 - 2.03)                                            | 0.977                                                | 674 (61.8)                               | 364 (33.4)                               |
| 0.87 (0.66 - 1.14)                                           | 0.3026                                              | 0.99 (0.56 - 1.75)                                            | 0.9771                                               | 607 (55.6)                               | 403 (36.9)                               |
| 0.92 (0.67 - 1.26)                                           | 0.5964                                              | 0.92 (0.66 - 1.28)                                            | 0.6098                                               | 276 (25.3)                               | 546 (50.1)                               |
| 1.31 (0.98 - 1.74)                                           | 0.0637                                              | 0.84 (0.55 - 1.29)                                            | 0.4215                                               | 372 (34.1)                               | 552 (50.6)                               |
| 0.90 (0.67 - 1.21)                                           | 0.4931                                              | 0.90 (0.38 - 2.10)                                            | 0.8024                                               | 720 (66.1)                               | 344 (31.6)                               |
| 0.80 (0.61 - 1.05)                                           | 0.106                                               | 0.87 (0.57 - 1.34)                                            | 0.5342                                               | 484 (44.4)                               | 482 (44.3)                               |
| 0.75 (0.54 - 1.03)                                           | 0.073                                               | 0.55 (0.22 - 1.39)                                            | 0.2045                                               | 802 (73.8)                               | 256 (23.6)                               |
| 0.93 (0.70 - 1.25)                                           | 0.6454                                              | 1.77 (0.82 - 3.83)                                            | 0.1473                                               | 689 (63.3)                               | 349 (32.0)                               |
| 1.01 (0.63 - 1.64)                                           | 0.9566                                              | 0.90 (0.27 - 2.93)                                            | 0.8579                                               | 963 (89.6)                               | 96 (8.9)                                 |
| 1.10 (0.77 - 1.57)                                           | 0.593                                               | 4.49 (0.92 - )                                                | 0.0632                                               | 884 (81.0)                               | 191 (17.5)                               |
| 1.56 (1.07 - 2.27)                                           | 0.022                                               | 0.84 (0.26 - 2.64)                                            | 0.7612                                               | 893 (81.9)                               | 182 (16.7)                               |
| 0.78 (0.51 - 1.20)                                           | 0.265                                               | 0.28 (0.06 - 1.41)                                            | 0.1225                                               | 941 (86.6)                               | 139 (12.8)                               |
| 0.91 (0.48 - 1.72)                                           | 0.7627                                              | 0.84 (0.05 - )                                                | 0.8991                                               | 1031 (94.5)                              | 59 (5.4)                                 |
| 0.95 (0.66 - 1.37)                                           | 0.7822                                              | 0.45 (0.04 - 5.00)                                            | 0.5165                                               | 928 (85.1)                               | 158 (14.5)                               |
| 1.00 (0.75 - 1.34)                                           | 0.9974                                              | 0.80 (0.52 - 1.23)                                            | 0.3088                                               | 514 (47.2)                               | 475 (43.6)                               |
| 0.92 (0.69 - 1.22)                                           | 0.5482                                              | 0.76 (0.36 - 1.59)                                            | 0.4615                                               | 729 (66.9)                               | 322 (29.6)                               |
| 0.76 (0.57 - 1.01)                                           | 0.0595                                              | 0.79 (0.54 - 1.16)                                            | 0.2306                                               | 390 (35.8)                               | 519 (47.6)                               |
| 1.21 (0.89 - 1.66)                                           | 0.2229                                              | 1.10 (0.79 - 1.54)                                            | 0.5567                                               | 322 (29.6)                               | 524 (48.1)                               |
| 1.00 (0.75 - 1.35)                                           | 0.9775                                              | 0.95 (0.56 - 1.62)                                            | 0.8563                                               | 574 (52.6)                               | 435 (39.9)                               |
| 1.09 (0.82 - 1.46)                                           | 0.535                                               | 0.68 (0.40 - 1.13)                                            | 0.1378                                               | 532 (48.9)                               | 467 (42.9)                               |
| 1.18 (0.85 - 1.63)                                           | 0.3173                                              | 0.19 (0.04 - 0.90)                                            | 0.0365                                               | 805 (73.9)                               | 271 (24.9)                               |

|                    |        |                    |        |            |            |
|--------------------|--------|--------------------|--------|------------|------------|
| 1.12 (0.82 - 1.55) | 0.4733 | 0.68 (0.26 - 1.76) | 0.4218 | 796 (73.0) | 270 (24.8) |
| 0.96 (0.73 - 1.27) | 0.797  | 0.60 (0.35 - 1.01) | 0.0566 | 543 (49.9) | 451 (41.5) |
| 1.04 (0.78 - 1.39) | 0.7702 | 0.89 (0.46 - 1.74) | 0.7407 | 651 (59.7) | 379 (34.8) |
| 0.92 (0.69 - 1.22) | 0.5412 | 0.64 (0.33 - 1.25) | 0.1897 | 654 (59.9) | 384 (35.2) |
| 1.03 (0.79 - 1.36) | 0.8126 | 0.98 (0.62 - 1.54) | 0.925  | 540 (49.5) | 438 (40.1) |
| 1.05 (0.77 - 1.42) | 0.7783 | 1.07 (0.76 - 1.52) | 0.6931 | 331 (30.4) | 549 (50.4) |
| 0.88 (0.65 - 1.18) | 0.3845 | 1.09 (0.59 - 2.02) | 0.7856 | 660 (60.6) | 370 (33.9) |
| 0.94 (0.69 - 1.29) | 0.706  | 0.25 (0.10 - 0.63) | 0.0034 | 718 (65.8) | 346 (31.7) |
| 1.15 (0.85 - 1.56) | 0.3584 | 0.55 (0.23 - 1.28) | 0.1652 | 748 (68.7) | 314 (28.8) |
| 0.93 (0.70 - 1.23) | 0.6019 | 0.70 (0.43 - 1.13) | 0.1407 | 489 (44.9) | 498 (45.7) |
| 0.73 (0.51 - 1.05) | 0.0915 | 983057.8 (0.00 - ) | 0.9841 | 898 (82.5) | 186 (17.1) |
| 1.05 (0.79 - 1.38) | 0.7513 | 0.76 (0.46 - 1.27) | 0.3003 | 536 (49.2) | 462 (42.4) |
| 0.75 (0.51 - 1.09) | 0.1296 | 980946.8 (0.00 - ) | 0.9841 | 914 (83.9) | 171 (15.7) |
| 1.09 (0.79 - 1.50) | 0.6025 | 0.64 (0.26 - 1.53) | 0.3113 | 787 (72.3) | 274 (25.2) |
| 0.83 (0.63 - 1.09) | 0.183  | 0.63 (0.38 - 1.03) | 0.0657 | 530 (48.6) | 461 (42.3) |
| 0.81 (0.57 - 1.14) | 0.217  | 0.96 (0.33 - 2.82) | 0.9414 | 848 (78.0) | 227 (20.9) |
| 0.74 (0.55 - 1.01) | 0.058  | 0.74 (0.33 - 1.67) | 0.4706 | 730 (67.0) | 332 (30.5) |
| 1.34 (0.92 - 1.96) | 0.1263 | 0.54 (0.14 - 2.15) | 0.3854 | 864 (79.6) | 208 (19.2) |
| 1.57 (1.13 - 2.17) | 0.0067 | 0.92 (0.67 - 1.27) | 0.6211 | 280 (25.7) | 541 (49.6) |
| 1.17 (0.88 - 1.55) | 0.2855 | 1.07 (0.71 - 1.63) | 0.7361 | 468 (43.0) | 477 (43.8) |
| 1.21 (0.88 - 1.66) | 0.2461 | 0.80 (0.58 - 1.11) | 0.1846 | 314 (28.8) | 549 (50.4) |
| 0.95 (0.71 - 1.28) | 0.7368 | 0.56 (0.28 - 1.13) | 0.1051 | 704 (64.5) | 342 (31.3) |
| 0.94 (0.71 - 1.25) | 0.6775 | 0.62 (0.38 - 1.01) | 0.0563 | 527 (48.3) | 470 (43.1) |
| 0.85 (0.64 - 1.13) | 0.2654 | 0.74 (0.43 - 1.28) | 0.2795 | 590 (54.3) | 427 (39.3) |
| 0.95 (0.70 - 1.28) | 0.7195 | 0.70 (0.35 - 1.43) | 0.3343 | 649 (59.6) | 389 (35.7) |
| 0.71 (0.51 - 1.01) | 0.0544 | 1.03 (0.41 - 2.60) | 0.9443 | 821 (75.4) | 245 (22.5) |
| 1.46 (1.05 - 2.03) | 0.0259 | 0.77 (0.31 - 1.90) | 0.5733 | 776 (71.1) | 286 (26.2) |
| 0.77 (0.50 - 1.18) | 0.2365 | 0.56 (0.13 - 2.46) | 0.4471 | 922 (84.9) | 160 (14.7) |
| 0.89 (0.67 - 1.18) | 0.4023 | 0.65 (0.35 - 1.20) | 0.1653 | 633 (58.1) | 400 (36.7) |
| 0.84 (0.63 - 1.11) | 0.2207 | 0.70 (0.46 - 1.07) | 0.0994 | 500 (45.9) | 467 (42.9) |
| 0.91 (0.68 - 1.21) | 0.5046 | 0.93 (0.49 - 1.76) | 0.8275 | 639 (58.8) | 389 (35.8) |
| 0.83 (0.62 - 1.12) | 0.2177 | 0.72 (0.35 - 1.50) | 0.3839 | 713 (65.4) | 334 (30.6) |
| 0.82 (0.51 - 1.32) | 0.4097 | 0.98 (0.20 - 4.86) | 0.9801 | 980 (90.0) | 103 (9.5)  |
| 0.78 (0.60 - 1.03) | 0.083  | 1.07 (0.70 - 1.64) | 0.7466 | 484 (44.4) | 478 (43.9) |
| 1.06 (0.65 - 1.72) | 0.8159 | 2.23 (0.43 - )     | 0.3394 | 991 (90.9) | 94 (8.6)   |
| 0.97 (0.72 - 1.30) | 0.832  | 0.82 (0.48 - 1.40) | 0.464  | 580 (53.4) | 418 (38.5) |
| 0.86 (0.57 - 1.29) | 0.4583 | 277664.0 (0.00 - ) | 0.9864 | 954 (87.5) | 134 (12.3) |
| 1.77 (1.11 - 2.81) | 0.0161 | 0.51 (0.05 - 5.66) | 0.5858 | 970 (89.1) | 114 (10.5) |
| 1.73 (1.09 - 2.74) | 0.0208 | 0.73 (0.14 - 3.70) | 0.6997 | 943 (86.4) | 140 (12.8) |
| 0.85 (0.56 - 1.29) | 0.4465 | 0.49 (0.09 - 2.62) | 0.4017 | 922 (84.6) | 162 (14.9) |
| 0.80 (0.51 - 1.26) | 0.341  | 0.37 (0.04 - 3.56) | 0.3884 | 968 (88.9) | 119 (10.9) |
| 0.85 (0.62 - 1.17) | 0.3229 | 0.57 (0.18 - 1.80) | 0.3393 | 798 (73.2) | 276 (25.3) |
| 1.26 (0.88 - 1.80) | 0.2128 | 0.14 (0.02 - 1.10) | 0.0611 | 853 (78.3) | 221 (20.3) |
| 1.00 (0.71 - 1.41) | 0.9915 | 0.20 (0.04 - 0.96) | 0.0444 | 834 (76.4) | 248 (22.7) |
| 1.24 (0.91 - 1.69) | 0.1736 | 0.31 (0.10 - 0.96) | 0.0431 | 767 (70.4) | 304 (27.9) |
| 0.98 (0.71 - 1.36) | 0.9082 | 0.40 (0.13 - 1.17) | 0.094  | 816 (74.8) | 256 (23.5) |
| 1.43 (0.98 - 2.07) | 0.0625 | 1.65 (0.46 - 5.91) | 0.4424 | 902 (82.7) | 178 (16.3) |
| 1.04 (0.77 - 1.40) | 0.8134 | 1.17 (0.84 - 1.64) | 0.3461 | 324 (29.8) | 534 (49.1) |
| 0.99 (0.69 - 1.42) | 0.9552 | 0.17 (0.02 - 1.46) | 0.1058 | 875 (80.2) | 208 (19.1) |
| 1.01 (0.74 - 1.36) | 0.9587 | 0.91 (0.64 - 1.29) | 0.6035 | 360 (33.0) | 541 (49.6) |
| 0.88 (0.59 - 1.31) | 0.5231 | 0.30 (0.06 - 1.53) | 0.1489 | 932 (85.4) | 154 (14.1) |
| 1.22 (0.89 - 1.69) | 0.2218 | 1.15 (0.44 - 3.04) | 0.7769 | 793 (72.8) | 273 (25.0) |
| 1.01 (0.75 - 1.36) | 0.9568 | 0.94 (0.66 - 1.35) | 0.7547 | 363 (33.4) | 535 (49.3) |

|                    |        |                    |        |             |            |
|--------------------|--------|--------------------|--------|-------------|------------|
| 1.14 (0.79 - 1.64) | 0.4719 | 1.85 (0.54 - 6.39) | 0.329  | 890 (81.7)  | 191 (17.5) |
| 1.05 (0.78 - 1.42) | 0.7512 | 0.84 (0.59 - 1.18) | 0.3066 | 351 (32.2)  | 530 (48.6) |
| 0.78 (0.59 - 1.03) | 0.0815 | 0.92 (0.57 - 1.46) | 0.7123 | 602 (55.3)  | 408 (37.5) |
| 0.83 (0.63 - 1.10) | 0.1922 | 1.14 (0.79 - 1.63) | 0.4905 | 428 (39.3)  | 494 (45.3) |
| 1.05 (0.77 - 1.42) | 0.7769 | 0.98 (0.71 - 1.36) | 0.9218 | 286 (26.2)  | 536 (49.2) |
| 0.79 (0.60 - 1.04) | 0.0891 | 0.96 (0.64 - 1.42) | 0.8259 | 501 (45.9)  | 465 (42.6) |
| 1.43 (0.99 - 2.08) | 0.0586 | 1.65 (0.46 - 5.91) | 0.4425 | 897 (82.3)  | 181 (16.6) |
| 0.91 (0.59 - 1.42) | 0.6893 | 0.00 (0.00 - )     | 0.9838 | 954 (87.7)  | 131 (12.0) |
| 1.08 (0.73 - 1.61) | 0.6957 | 0.33 (0.03 - 3.15) | 0.3335 | 912 (84.0)  | 169 (15.6) |
| 1.02 (0.65 - 1.58) | 0.9458 | 0.00 (0.00 - )     | 0.9868 | 955 (87.7)  | 131 (12.0) |
| 0.74 (0.56 - 0.99) | 0.0392 | 0.93 (0.60 - 1.43) | 0.7444 | 575 (52.7)  | 424 (38.9) |
| 0.95 (0.73 - 1.25) | 0.7278 | 0.99 (0.54 - 1.81) | 0.9683 | 591 (54.2)  | 438 (40.1) |
| 1.22 (0.81 - 1.83) | 0.3428 | 0.37 (0.04 - 3.66) | 0.3983 | 938 (86.0)  | 150 (13.7) |
| 1.03 (0.78 - 1.37) | 0.8136 | 0.79 (0.44 - 1.42) | 0.4239 | 643 (58.9)  | 386 (35.4) |
| 0.68 (0.41 - 1.15) | 0.1515 | 0.64 (0.04 - )     | 0.7616 | 1010 (92.7) | 78 (7.2)   |
| 1.07 (0.81 - 1.41) | 0.6381 | 0.98 (0.66 - 1.45) | 0.9041 | 431 (39.5)  | 516 (47.3) |
| 0.91 (0.62 - 1.33) | 0.6264 | 1501215 (0.00 - )  | 0.9813 | 906 (83.0)  | 175 (16.0) |
| 1.05 (0.75 - 1.47) | 0.7792 | 0.60 (0.14 - 2.53) | 0.4886 | 888 (81.4)  | 197 (18.1) |
| 0.98 (0.72 - 1.32) | 0.8878 | 1.09 (0.78 - 1.51) | 0.616  | 306 (28.0)  | 547 (50.1) |
| 1.38 (1.00 - 1.90) | 0.0503 | 0.82 (0.39 - 1.75) | 0.611  | 759 (69.7)  | 295 (27.1) |
| 1.36 (1.01 - 1.83) | 0.0457 | 1.11 (0.58 - 2.09) | 0.7567 | 669 (61.6)  | 366 (33.7) |
| 1.31 (0.98 - 1.77) | 0.0726 | 1.14 (0.65 - 2.00) | 0.6372 | 645 (59.1)  | 376 (34.5) |
| 0.84 (0.63 - 1.12) | 0.2376 | 1.09 (0.66 - 1.79) | 0.7461 | 563 (51.7)  | 445 (40.8) |
| 1.01 (0.77 - 1.34) | 0.9314 | 1.29 (0.77 - 2.15) | 0.3379 | 577 (52.9)  | 429 (39.3) |
| 1.05 (0.80 - 1.38) | 0.715  | 1.11 (0.74 - 1.65) | 0.6134 | 428 (39.3)  | 518 (47.5) |
| 1.04 (0.64 - 1.67) | 0.8872 | 0.00 (0.00 - )     | 0.9858 | 988 (90.6)  | 99 (9.1)   |
| 1.16 (0.86 - 1.55) | 0.3359 | 0.89 (0.61 - 1.29) | 0.5305 | 374 (34.3)  | 537 (49.2) |
| 0.87 (0.65 - 1.16) | 0.3438 | 0.95 (0.59 - 1.52) | 0.8218 | 595 (54.5)  | 414 (37.9) |
| 0.99 (0.75 - 1.32) | 0.955  | 1.29 (0.67 - 2.48) | 0.4371 | 662 (60.7)  | 384 (35.2) |
| 1.41 (1.02 - 1.95) | 0.0371 | 0.99 (0.47 - 2.08) | 0.9781 | 759 (69.6)  | 296 (27.2) |
| 1.33 (0.99 - 1.79) | 0.0576 | 0.68 (0.38 - 1.21) | 0.1887 | 649 (59.6)  | 387 (35.5) |
| 1.32 (0.98 - 1.79) | 0.0718 | 0.96 (0.52 - 1.77) | 0.886  | 691 (63.5)  | 347 (31.9) |
| 1.43 (1.01 - 2.00) | 0.0417 | 1.07 (0.47 - 2.42) | 0.877  | 782 (72.1)  | 274 (25.3) |
| 1.55 (1.11 - 2.16) | 0.0102 | 1.16 (0.56 - 2.37) | 0.6932 | 765 (70.2)  | 289 (26.5) |
| 0.93 (0.56 - 1.54) | 0.7763 | 1.95 (0.16 - )     | 0.5975 | 1001 (91.8) | 87 (8.0)   |
| 0.93 (0.61 - 1.42) | 0.7517 | 0.35 (0.07 - 1.75) | 0.2005 | 947 (86.9)  | 138 (12.7) |

| AAO_All<br>Genotype n(%)<br>2/2<br>Cases | AAO_All<br>Trend Model<br>HR (95%CI) | AAO_All Trend P-<br>value | AAO_All<br>Dominant Model<br>HR (95%CI) | AAO_All Dominant<br>P-value |
|------------------------------------------|--------------------------------------|---------------------------|-----------------------------------------|-----------------------------|
| 161 (15.0)                               | 0.99 (0.90 - 1.08)                   | 0.8136                    | 0.91 (0.81 - 1.03)                      | 0.1481                      |
| 204 (18.7)                               | 1.09 (1.00 - 1.18)                   | 0.0409                    | 1.16 (1.02 - 1.31)                      | 0.0221                      |
| 8 (0.7)                                  | 0.97 (0.84 - 1.12)                   | 0.6852                    | 0.99 (0.84 - 1.16)                      | 0.8837                      |
| 0 (0.0)                                  | 0.96 (0.78 - 1.19)                   | 0.7206                    | 0.96 (0.78 - 1.19)                      | 0.7206                      |
| 246 (22.6)                               | 1.01 (0.93 - 1.10)                   | 0.8115                    | 1.02 (0.89 - 1.16)                      | 0.7906                      |
| 180 (16.5)                               | 0.96 (0.88 - 1.05)                   | 0.3649                    | 0.99 (0.88 - 1.12)                      | 0.9059                      |
| 216 (19.8)                               | 0.98 (0.90 - 1.07)                   | 0.671                     | 1.01 (0.89 - 1.15)                      | 0.8543                      |
| 20 (1.8)                                 | 0.91 (0.81 - 1.03)                   | 0.1542                    | 0.91 (0.79 - 1.05)                      | 0.2035                      |
| 189 (17.4)                               | 1.05 (0.97 - 1.15)                   | 0.2225                    | 1.06 (0.93 - 1.20)                      | 0.3667                      |
| 216 (19.8)                               | 0.98 (0.90 - 1.07)                   | 0.6675                    | 1.01 (0.89 - 1.15)                      | 0.8692                      |
| 5 (0.5)                                  | 1.32 (1.10 - 1.59)                   | 0.003                     | 1.32 (1.09 - 1.61)                      | 0.0051                      |
| 12 (1.1)                                 | 0.92 (0.81 - 1.05)                   | 0.2296                    | 0.91 (0.79 - 1.04)                      | 0.1677                      |
| 4 (0.4)                                  | 0.92 (0.80 - 1.06)                   | 0.26                      | 0.91 (0.78 - 1.06)                      | 0.2149                      |
| 63 (5.8)                                 | 1.02 (0.93 - 1.13)                   | 0.6551                    | 1.03 (0.91 - 1.16)                      | 0.6598                      |
| 10 (0.9)                                 | 1.08 (0.93 - 1.26)                   | 0.2991                    | 1.06 (0.90 - 1.25)                      | 0.4554                      |
| 19 (1.7)                                 | 1.04 (0.91 - 1.18)                   | 0.5564                    | 1.01 (0.88 - 1.16)                      | 0.8926                      |
| 41 (3.8)                                 | 0.95 (0.85 - 1.06)                   | 0.347                     | 0.94 (0.83 - 1.07)                      | 0.3781                      |
| 82 (7.5)                                 | 0.95 (0.87 - 1.04)                   | 0.2977                    | 0.96 (0.85 - 1.08)                      | 0.5044                      |
| 40 (3.7)                                 | 1.06 (0.96 - 1.19)                   | 0.2572                    | 1.06 (0.93 - 1.20)                      | 0.3649                      |
| 262 (24.0)                               | 0.96 (0.88 - 1.04)                   | 0.3442                    | 0.90 (0.79 - 1.03)                      | 0.1423                      |
| 4 (0.4)                                  | 1.08 (0.91 - 1.28)                   | 0.3975                    | 1.10 (0.92 - 1.33)                      | 0.2971                      |
| 267 (24.6)                               | 1.02 (0.94 - 1.11)                   | 0.6727                    | 1.02 (0.89 - 1.17)                      | 0.7803                      |
| 13 (1.2)                                 | 1.08 (0.94 - 1.25)                   | 0.2907                    | 1.09 (0.93 - 1.27)                      | 0.3069                      |
| 201 (18.4)                               | 0.97 (0.89 - 1.06)                   | 0.4732                    | 0.98 (0.86 - 1.12)                      | 0.7744                      |
| 60 (5.5)                                 | 0.95 (0.86 - 1.05)                   | 0.3478                    | 0.95 (0.84 - 1.07)                      | 0.4274                      |
| 28 (2.6)                                 | 1.11 (0.99 - 1.24)                   | 0.0828                    | 1.11 (0.97 - 1.26)                      | 0.1265                      |
| 123 (11.3)                               | 0.96 (0.88 - 1.05)                   | 0.4212                    | 0.96 (0.85 - 1.09)                      | 0.5335                      |
| 52 (4.8)                                 | 1.10 (0.99 - 1.22)                   | 0.0813                    | 1.08 (0.95 - 1.22)                      | 0.233                       |
| 81 (7.4)                                 | 0.94 (0.86 - 1.04)                   | 0.2204                    | 0.93 (0.82 - 1.05)                      | 0.2168                      |
| 268 (24.6)                               | 1.03 (0.95 - 1.12)                   | 0.4906                    | 1.05 (0.92 - 1.21)                      | 0.4547                      |
| 166 (15.2)                               | 0.95 (0.87 - 1.04)                   | 0.2702                    | 0.95 (0.83 - 1.07)                      | 0.3775                      |
| 26 (2.4)                                 | 1.05 (0.93 - 1.17)                   | 0.4531                    | 1.02 (0.90 - 1.16)                      | 0.755                       |
| 123 (11.3)                               | 1.03 (0.94 - 1.12)                   | 0.5831                    | 1.05 (0.93 - 1.18)                      | 0.4209                      |
| 29 (2.7)                                 | 1.17 (1.04 - 1.31)                   | 0.009                     | 1.20 (1.05 - 1.38)                      | 0.0076                      |
| 51 (4.7)                                 | 0.94 (0.85 - 1.04)                   | 0.2422                    | 0.93 (0.82 - 1.05)                      | 0.2524                      |
| 16 (1.5)                                 | 1.33 (1.12 - 1.57)                   | 0.0009                    | 1.32 (1.08 - 1.60)                      | 0.0058                      |
| 16 (1.5)                                 | 0.88 (0.77 - 1.00)                   | 0.0565                    | 0.89 (0.76 - 1.03)                      | 0.1193                      |
| 15 (1.4)                                 | 0.91 (0.79 - 1.04)                   | 0.1612                    | 0.90 (0.77 - 1.05)                      | 0.1859                      |
| 7 (0.6)                                  | 1.06 (0.89 - 1.25)                   | 0.5245                    | 1.02 (0.86 - 1.22)                      | 0.7881                      |
| 1 (0.1)                                  | 1.18 (0.91 - 1.51)                   | 0.2079                    | 1.20 (0.92 - 1.55)                      | 0.1812                      |
| 5 (0.5)                                  | 1.03 (0.87 - 1.21)                   | 0.7377                    | 1.02 (0.86 - 1.20)                      | 0.8448                      |
| 100 (9.2)                                | 1.01 (0.92 - 1.11)                   | 0.8949                    | 0.98 (0.87 - 1.10)                      | 0.6775                      |
| 38 (3.5)                                 | 1.01 (0.90 - 1.12)                   | 0.9077                    | 0.99 (0.87 - 1.13)                      | 0.8994                      |
| 181 (16.6)                               | 1.01 (0.93 - 1.10)                   | 0.7479                    | 1.03 (0.91 - 1.16)                      | 0.6782                      |
| 243 (22.3)                               | 1.07 (0.98 - 1.16)                   | 0.1211                    | 1.07 (0.94 - 1.22)                      | 0.3178                      |
| 82 (7.5)                                 | 1.16 (1.06 - 1.27)                   | 0.0019                    | 1.21 (1.08 - 1.37)                      | 0.0016                      |
| 90 (8.3)                                 | 1.00 (0.91 - 1.10)                   | 0.9268                    | 1.00 (0.88 - 1.12)                      | 0.9496                      |
| 13 (1.2)                                 | 1.09 (0.96 - 1.24)                   | 0.1972                    | 1.06 (0.93 - 1.22)                      | 0.3662                      |

|            |                    |        |                    |        |
|------------|--------------------|--------|--------------------|--------|
| 24 (2.2)   | 1.03 (0.92 - 1.16) | 0.602  | 1.03 (0.90 - 1.18) | 0.6575 |
| 94 (8.6)   | 1.11 (1.01 - 1.22) | 0.027  | 1.13 (1.00 - 1.27) | 0.0535 |
| 60 (5.5)   | 1.10 (1.00 - 1.22) | 0.054  | 1.10 (0.97 - 1.24) | 0.1293 |
| 53 (4.9)   | 0.96 (0.86 - 1.06) | 0.4082 | 0.92 (0.81 - 1.04) | 0.1628 |
| 113 (10.4) | 1.07 (0.98 - 1.17) | 0.1405 | 1.05 (0.93 - 1.18) | 0.4119 |
| 209 (19.2) | 1.04 (0.96 - 1.14) | 0.3443 | 1.06 (0.93 - 1.21) | 0.3612 |
| 60 (5.5)   | 1.01 (0.91 - 1.12) | 0.8544 | 0.99 (0.88 - 1.12) | 0.8983 |
| 27 (2.5)   | 1.11 (0.99 - 1.25) | 0.0637 | 1.11 (0.98 - 1.26) | 0.0961 |
| 27 (2.5)   | 1.05 (0.93 - 1.18) | 0.4086 | 1.02 (0.90 - 1.16) | 0.7618 |
| 102 (9.4)  | 0.99 (0.90 - 1.08) | 0.8156 | 1.00 (0.89 - 1.13) | 0.9905 |
| 5 (0.5)    | 0.90 (0.77 - 1.05) | 0.1702 | 0.90 (0.77 - 1.05) | 0.1787 |
| 92 (8.4)   | 0.99 (0.90 - 1.09) | 0.891  | 0.99 (0.87 - 1.11) | 0.8039 |
| 5 (0.5)    | 0.92 (0.78 - 1.07) | 0.2729 | 0.92 (0.78 - 1.08) | 0.2906 |
| 27 (2.5)   | 1.07 (0.95 - 1.21) | 0.2531 | 1.05 (0.92 - 1.20) | 0.4435 |
| 100 (9.2)  | 1.04 (0.95 - 1.14) | 0.3457 | 1.13 (1.00 - 1.27) | 0.0487 |
| 12 (1.1)   | 1.07 (0.93 - 1.22) | 0.3355 | 1.08 (0.93 - 1.24) | 0.3109 |
| 28 (2.6)   | 1.04 (0.93 - 1.16) | 0.5144 | 1.05 (0.93 - 1.19) | 0.4452 |
| 13 (1.2)   | 1.08 (0.94 - 1.24) | 0.2721 | 1.05 (0.91 - 1.22) | 0.4921 |
| 269 (24.7) | 0.94 (0.86 - 1.02) | 0.1376 | 0.91 (0.79 - 1.04) | 0.1706 |
| 143 (13.1) | 1.06 (0.97 - 1.16) | 0.1994 | 1.04 (0.92 - 1.17) | 0.5614 |
| 227 (20.8) | 0.95 (0.87 - 1.04) | 0.2533 | 0.90 (0.79 - 1.03) | 0.1212 |
| 45 (4.1)   | 1.13 (1.01 - 1.25) | 0.0267 | 1.12 (0.99 - 1.27) | 0.0787 |
| 93 (8.5)   | 1.07 (0.97 - 1.17) | 0.1605 | 1.08 (0.96 - 1.22) | 0.1926 |
| 70 (6.4)   | 0.99 (0.90 - 1.09) | 0.8299 | 1.03 (0.92 - 1.17) | 0.5818 |
| 51 (4.7)   | 1.01 (0.91 - 1.12) | 0.8133 | 0.99 (0.88 - 1.12) | 0.9039 |
| 23 (2.1)   | 1.03 (0.91 - 1.17) | 0.6295 | 1.03 (0.89 - 1.18) | 0.6979 |
| 29 (2.7)   | 0.96 (0.86 - 1.08) | 0.5149 | 0.93 (0.82 - 1.06) | 0.2945 |
| 4 (0.4)    | 0.98 (0.84 - 1.15) | 0.8452 | 1.02 (0.86 - 1.21) | 0.8108 |
| 57 (5.2)   | 0.99 (0.90 - 1.09) | 0.8472 | 1.03 (0.91 - 1.16) | 0.6506 |
| 122 (11.2) | 0.97 (0.89 - 1.06) | 0.5293 | 0.96 (0.85 - 1.08) | 0.4914 |
| 58 (5.3)   | 1.12 (1.02 - 1.24) | 0.0199 | 1.17 (1.03 - 1.32) | 0.0126 |
| 43 (3.9)   | 1.10 (0.99 - 1.23) | 0.0639 | 1.14 (1.01 - 1.29) | 0.0384 |
| 6 (0.6)    | 0.95 (0.79 - 1.14) | 0.5598 | 0.96 (0.79 - 1.17) | 0.6967 |
| 127 (11.7) | 1.00 (0.92 - 1.10) | 0.9178 | 1.01 (0.90 - 1.14) | 0.8465 |
| 5 (0.5)    | 1.08 (0.89 - 1.30) | 0.4443 | 1.12 (0.91 - 1.38) | 0.2962 |
| 88 (8.1)   | 1.04 (0.95 - 1.14) | 0.401  | 1.04 (0.92 - 1.17) | 0.5498 |
| 2 (0.2)    | 0.86 (0.72 - 1.02) | 0.0889 | 0.84 (0.70 - 1.01) | 0.0686 |
| 5 (0.5)    | 1.00 (0.83 - 1.20) | 0.9655 | 0.96 (0.79 - 1.16) | 0.6813 |
| 8 (0.7)    | 0.88 (0.75 - 1.03) | 0.1193 | 0.86 (0.73 - 1.03) | 0.0962 |
| 6 (0.6)    | 1.15 (0.98 - 1.34) | 0.0823 | 1.17 (0.99 - 1.38) | 0.0648 |
| 2 (0.2)    | 1.04 (0.87 - 1.26) | 0.6631 | 1.03 (0.86 - 1.25) | 0.726  |
| 16 (1.5)   | 0.94 (0.83 - 1.06) | 0.3206 | 0.95 (0.83 - 1.08) | 0.4238 |
| 15 (1.4)   | 1.11 (0.97 - 1.27) | 0.1372 | 1.07 (0.93 - 1.24) | 0.3629 |
| 9 (0.8)    | 0.92 (0.81 - 1.06) | 0.2425 | 0.92 (0.80 - 1.06) | 0.2385 |
| 18 (1.7)   | 1.09 (0.97 - 1.23) | 0.1634 | 1.06 (0.93 - 1.21) | 0.3523 |
| 19 (1.7)   | 1.13 (0.99 - 1.28) | 0.0642 | 1.11 (0.97 - 1.28) | 0.1231 |
| 11 (1.0)   | 0.90 (0.78 - 1.04) | 0.1592 | 0.90 (0.77 - 1.05) | 0.1817 |
| 230 (21.1) | 0.96 (0.88 - 1.04) | 0.3005 | 0.97 (0.85 - 1.10) | 0.6133 |
| 8 (0.7)    | 1.14 (0.99 - 1.32) | 0.0687 | 1.14 (0.98 - 1.32) | 0.0906 |
| 189 (17.3) | 1.04 (0.96 - 1.14) | 0.3178 | 1.06 (0.93 - 1.20) | 0.3952 |
| 5 (0.5)    | 1.18 (1.01 - 1.39) | 0.0402 | 1.20 (1.01 - 1.42) | 0.0342 |
| 24 (2.2)   | 0.96 (0.85 - 1.08) | 0.4887 | 0.94 (0.82 - 1.08) | 0.3697 |
| 188 (17.3) | 1.05 (0.96 - 1.14) | 0.2984 | 1.07 (0.94 - 1.21) | 0.3266 |

|            |                    |        |                    |        |
|------------|--------------------|--------|--------------------|--------|
| 9 (0.8)    | 0.95 (0.82 - 1.09) | 0.4447 | 0.96 (0.83 - 1.12) | 0.6448 |
| 209 (19.2) | 0.98 (0.90 - 1.06) | 0.5892 | 0.95 (0.83 - 1.07) | 0.3914 |
| 79 (7.3)   | 1.02 (0.93 - 1.12) | 0.6917 | 1.08 (0.96 - 1.22) | 0.1952 |
| 168 (15.4) | 0.97 (0.89 - 1.05) | 0.4779 | 1.02 (0.91 - 1.16) | 0.716  |
| 268 (24.6) | 1.04 (0.96 - 1.14) | 0.2986 | 1.09 (0.95 - 1.24) | 0.2375 |
| 125 (11.5) | 1.00 (0.91 - 1.09) | 0.9402 | 1.02 (0.90 - 1.15) | 0.7496 |
| 12 (1.1)   | 0.90 (0.78 - 1.04) | 0.165  | 0.90 (0.77 - 1.05) | 0.1654 |
| 3 (0.3)    | 0.95 (0.79 - 1.13) | 0.55   | 0.94 (0.78 - 1.13) | 0.4934 |
| 5 (0.5)    | 0.97 (0.82 - 1.13) | 0.6723 | 0.95 (0.80 - 1.12) | 0.5175 |
| 3 (0.3)    | 1.10 (0.92 - 1.31) | 0.2972 | 1.09 (0.91 - 1.30) | 0.3739 |
| 92 (8.4)   | 1.00 (0.91 - 1.09) | 0.9672 | 1.02 (0.91 - 1.15) | 0.7358 |
| 62 (5.7)   | 0.93 (0.84 - 1.02) | 0.1386 | 0.90 (0.80 - 1.01) | 0.0805 |
| 3 (0.3)    | 0.99 (0.84 - 1.17) | 0.94   | 0.99 (0.83 - 1.17) | 0.8792 |
| 62 (5.7)   | 1.05 (0.95 - 1.16) | 0.3435 | 1.03 (0.92 - 1.17) | 0.5932 |
| 2 (0.2)    | 1.09 (0.88 - 1.35) | 0.4431 | 1.10 (0.88 - 1.39) | 0.3949 |
| 143 (13.1) | 1.05 (0.96 - 1.15) | 0.2741 | 1.05 (0.93 - 1.18) | 0.4641 |
| 10 (0.9)   | 0.99 (0.86 - 1.15) | 0.9198 | 1.02 (0.87 - 1.20) | 0.8056 |
| 6 (0.5)    | 0.97 (0.84 - 1.12) | 0.6868 | 0.97 (0.84 - 1.13) | 0.7234 |
| 238 (21.8) | 0.96 (0.89 - 1.05) | 0.3949 | 0.98 (0.86 - 1.12) | 0.7279 |
| 35 (3.2)   | 0.94 (0.84 - 1.05) | 0.2467 | 0.94 (0.82 - 1.06) | 0.3117 |
| 51 (4.7)   | 0.98 (0.89 - 1.09) | 0.7496 | 1.00 (0.88 - 1.13) | 0.9643 |
| 70 (6.4)   | 0.99 (0.90 - 1.09) | 0.8891 | 0.99 (0.88 - 1.12) | 0.9325 |
| 82 (7.5)   | 0.95 (0.86 - 1.05) | 0.313  | 0.91 (0.81 - 1.03) | 0.1267 |
| 85 (7.8)   | 1.07 (0.97 - 1.17) | 0.1749 | 1.09 (0.97 - 1.23) | 0.1531 |
| 144 (13.2) | 0.96 (0.87 - 1.04) | 0.3065 | 0.95 (0.84 - 1.07) | 0.3999 |
| 4 (0.4)    | 0.99 (0.82 - 1.21) | 0.9523 | 0.97 (0.79 - 1.19) | 0.7882 |
| 180 (16.5) | 0.95 (0.87 - 1.04) | 0.2533 | 0.90 (0.80 - 1.03) | 0.1176 |
| 82 (7.5)   | 0.99 (0.90 - 1.08) | 0.8303 | 1.04 (0.92 - 1.17) | 0.5072 |
| 44 (4.0)   | 1.04 (0.94 - 1.16) | 0.4211 | 1.04 (0.92 - 1.18) | 0.4982 |
| 35 (3.2)   | 0.93 (0.83 - 1.04) | 0.215  | 0.93 (0.82 - 1.06) | 0.3007 |
| 53 (4.9)   | 0.94 (0.84 - 1.04) | 0.2039 | 0.91 (0.81 - 1.03) | 0.1363 |
| 50 (4.6)   | 0.96 (0.87 - 1.06) | 0.4252 | 0.97 (0.86 - 1.10) | 0.6682 |
| 28 (2.6)   | 0.95 (0.85 - 1.07) | 0.3784 | 0.96 (0.84 - 1.10) | 0.5952 |
| 36 (3.3)   | 0.94 (0.84 - 1.05) | 0.287  | 0.94 (0.83 - 1.08) | 0.3896 |
| 2 (0.2)    | 1.11 (0.91 - 1.37) | 0.3029 | 1.14 (0.92 - 1.42) | 0.2374 |
| 5 (0.5)    | 0.96 (0.81 - 1.13) | 0.5939 | 0.97 (0.81 - 1.16) | 0.7345 |

| AAO_All<br>Recessive Model<br>HR (95%CI) | AAO_All Recessive<br>P-value | AAO_Men<br>Genotype n(%)<br>1/1<br>Cases | AAO_Men<br>Genotype n(%)<br>1/2<br>Cases | AAO_Men<br>Genotype n(%)<br>2/2<br>Cases | AAO_Men<br>Trend Model<br>HR (95%CI) |
|------------------------------------------|------------------------------|------------------------------------------|------------------------------------------|------------------------------------------|--------------------------------------|
| 1.14 (0.97 - 1.35)                       | 0.1137                       | 273 (39.6)                               | 316 (45.8)                               | 101 (14.6)                               | 0.98 (0.87 - 1.09)                   |
| 1.07 (0.92 - 1.25)                       | 0.3535                       | 226 (32.3)                               | 335 (47.9)                               | 138 (19.7)                               | 1.09 (0.98 - 1.20)                   |
| 0.68 (0.34 - 1.36)                       | 0.2745                       | 577 (82.4)                               | 117 (16.7)                               | 6 (0.9)                                  | 0.95 (0.80 - 1.14)                   |
| ( - )                                    | --                           | 645 (92.5)                               | 52 (7.5)                                 | 0 (0.0)                                  | 1.13 (0.86 - 1.51)                   |
| 1.01 (0.87 - 1.16)                       | 0.9064                       | 184 (26.3)                               | 349 (49.9)                               | 167 (23.9)                               | 0.99 (0.89 - 1.10)                   |
| 0.88 (0.75 - 1.04)                       | 0.1275                       | 251 (35.8)                               | 335 (47.8)                               | 115 (16.4)                               | 0.96 (0.86 - 1.06)                   |
| 0.93 (0.80 - 1.08)                       | 0.3441                       | 215 (30.7)                               | 345 (49.2)                               | 141 (20.1)                               | 1.00 (0.90 - 1.11)                   |
| 0.79 (0.51 - 1.24)                       | 0.3064                       | 543 (77.8)                               | 140 (20.1)                               | 15 (2.1)                                 | 0.89 (0.76 - 1.04)                   |
| 1.09 (0.93 - 1.28)                       | 0.2684                       | 243 (34.7)                               | 329 (46.9)                               | 129 (18.4)                               | 1.03 (0.93 - 1.14)                   |
| 0.93 (0.80 - 1.08)                       | 0.3507                       | 215 (30.7)                               | 344 (49.1)                               | 141 (20.1)                               | 1.00 (0.90 - 1.11)                   |
| 2.09 (0.87 - 5.04)                       | 0.1005                       | 628 (89.7)                               | 70 (10.0)                                | 2 (0.3)                                  | 1.38 (1.08 - 1.75)                   |
| 1.15 (0.65 - 2.03)                       | 0.6345                       | 537 (76.7)                               | 156 (22.3)                               | 7 (1.0)                                  | 0.98 (0.83 - 1.16)                   |
| 1.46 (0.55 - 3.90)                       | 0.447                        | 555 (79.3)                               | 143 (20.4)                               | 2 (0.3)                                  | 0.88 (0.74 - 1.06)                   |
| 1.03 (0.80 - 1.33)                       | 0.8271                       | 374 (53.7)                               | 281 (40.3)                               | 42 (6.0)                                 | 0.99 (0.88 - 1.12)                   |
| 1.71 (0.92 - 3.20)                       | 0.0916                       | 588 (84.1)                               | 107 (15.3)                               | 4 (0.6)                                  | 1.12 (0.92 - 1.36)                   |
| 1.58 (1.00 - 2.49)                       | 0.049                        | 532 (75.9)                               | 161 (23.0)                               | 8 (1.1)                                  | 0.99 (0.84 - 1.17)                   |
| 0.91 (0.67 - 1.25)                       | 0.566                        | 488 (69.9)                               | 185 (26.5)                               | 25 (3.6)                                 | 0.96 (0.84 - 1.11)                   |
| 0.87 (0.69 - 1.09)                       | 0.2251                       | 384 (54.9)                               | 262 (37.5)                               | 53 (7.6)                                 | 0.96 (0.85 - 1.07)                   |
| 1.19 (0.87 - 1.63)                       | 0.2813                       | 460 (65.8)                               | 219 (31.3)                               | 20 (2.9)                                 | 0.99 (0.86 - 1.14)                   |
| 1.00 (0.87 - 1.14)                       | 0.949                        | 196 (28.0)                               | 342 (48.8)                               | 163 (23.3)                               | 0.92 (0.83 - 1.02)                   |
| 0.74 (0.27 - 1.97)                       | 0.5421                       | 620 (88.7)                               | 77 (11.0)                                | 2 (0.3)                                  | 0.97 (0.78 - 1.21)                   |
| 1.03 (0.90 - 1.18)                       | 0.6795                       | 176 (25.2)                               | 343 (49.1)                               | 179 (25.6)                               | 1.01 (0.90 - 1.12)                   |
| 1.15 (0.66 - 2.00)                       | 0.6132                       | 578 (82.6)                               | 113 (16.1)                               | 9 (1.3)                                  | 1.07 (0.90 - 1.28)                   |
| 0.93 (0.80 - 1.08)                       | 0.3466                       | 215 (30.7)                               | 351 (50.1)                               | 134 (19.1)                               | 0.94 (0.85 - 1.05)                   |
| 0.91 (0.70 - 1.18)                       | 0.4585                       | 408 (58.5)                               | 251 (36.0)                               | 39 (5.6)                                 | 0.99 (0.88 - 1.13)                   |
| 1.28 (0.88 - 1.87)                       | 0.1986                       | 489 (69.9)                               | 196 (28.0)                               | 15 (2.1)                                 | 1.16 (1.00 - 1.34)                   |
| 0.93 (0.77 - 1.12)                       | 0.4624                       | 331 (47.3)                               | 296 (42.3)                               | 73 (10.4)                                | 0.98 (0.88 - 1.10)                   |
| 1.36 (1.03 - 1.79)                       | 0.0318                       | 427 (61.0)                               | 238 (34.0)                               | 35 (5.0)                                 | 1.09 (0.96 - 1.24)                   |
| 0.93 (0.74 - 1.17)                       | 0.5445                       | 387 (55.2)                               | 261 (37.2)                               | 53 (7.6)                                 | 0.92 (0.82 - 1.04)                   |
| 1.03 (0.89 - 1.18)                       | 0.7067                       | 174 (24.9)                               | 347 (49.6)                               | 179 (25.6)                               | 1.00 (0.90 - 1.11)                   |
| 0.93 (0.78 - 1.09)                       | 0.3576                       | 236 (33.7)                               | 357 (51.0)                               | 107 (15.3)                               | 0.93 (0.83 - 1.04)                   |
| 1.43 (0.97 - 2.11)                       | 0.0718                       | 458 (65.3)                               | 222 (31.7)                               | 21 (3.0)                                 | 1.06 (0.92 - 1.22)                   |
| 0.99 (0.82 - 1.19)                       | 0.9146                       | 295 (42.1)                               | 320 (45.7)                               | 85 (12.1)                                | 0.99 (0.89 - 1.10)                   |
| 1.20 (0.83 - 1.73)                       | 0.345                        | 508 (72.8)                               | 173 (24.8)                               | 17 (2.4)                                 | 1.17 (1.01 - 1.35)                   |
| 0.92 (0.69 - 1.21)                       | 0.5442                       | 448 (64.1)                               | 218 (31.2)                               | 33 (4.7)                                 | 0.98 (0.86 - 1.11)                   |
| 2.20 (1.34 - 3.61)                       | 0.0019                       | 618 (89.4)                               | 64 (9.3)                                 | 9 (1.3)                                  | 1.40 (1.13 - 1.73)                   |
| 0.64 (0.39 - 1.04)                       | 0.0726                       | 579 (82.6)                               | 110 (15.7)                               | 12 (1.7)                                 | 0.85 (0.72 - 1.01)                   |
| 0.81 (0.48 - 1.35)                       | 0.4213                       | 568 (81.1)                               | 120 (17.1)                               | 12 (1.7)                                 | 0.92 (0.78 - 1.09)                   |
| 2.64 (1.25 - 5.57)                       | 0.0109                       | 607 (86.8)                               | 89 (12.7)                                | 3 (0.4)                                  | 0.96 (0.78 - 1.20)                   |
| 0.82 (0.12 - 5.82)                       | 0.8419                       | 666 (95.0)                               | 34 (4.9)                                 | 1 (0.1)                                  | 1.42 (1.03 - 1.94)                   |
| 1.53 (0.63 - 3.69)                       | 0.3444                       | 591 (84.3)                               | 108 (15.4)                               | 2 (0.3)                                  | 0.95 (0.78 - 1.16)                   |
| 1.12 (0.91 - 1.37)                       | 0.2921                       | 317 (45.3)                               | 315 (45.0)                               | 68 (9.7)                                 | 1.06 (0.94 - 1.18)                   |
| 1.12 (0.81 - 1.55)                       | 0.4827                       | 468 (66.8)                               | 207 (29.5)                               | 26 (3.7)                                 | 0.93 (0.81 - 1.06)                   |
| 1.01 (0.86 - 1.18)                       | 0.9475                       | 251 (35.9)                               | 337 (48.1)                               | 112 (16.0)                               | 1.00 (0.90 - 1.11)                   |
| 1.12 (0.97 - 1.30)                       | 0.1161                       | 203 (29.0)                               | 336 (48.0)                               | 161 (23.0)                               | 1.04 (0.94 - 1.15)                   |
| 1.18 (0.94 - 1.47)                       | 0.1585                       | 376 (53.6)                               | 270 (38.5)                               | 55 (7.8)                                 | 1.21 (1.08 - 1.36)                   |
| 1.04 (0.84 - 1.29)                       | 0.7366                       | 348 (49.8)                               | 299 (42.8)                               | 52 (7.4)                                 | 1.05 (0.93 - 1.19)                   |
| 1.94 (1.12 - 3.36)                       | 0.0176                       | 519 (74.2)                               | 172 (24.6)                               | 8 (1.1)                                  | 1.08 (0.91 - 1.27)                   |

|                     |        |            |            |            |                    |
|---------------------|--------|------------|------------|------------|--------------------|
| 1.09 (0.73 - 1.64)  | 0.6673 | 516 (73.6) | 175 (25.0) | 10 (1.4)   | 1.01 (0.87 - 1.18) |
| 1.19 (0.97 - 1.47)  | 0.1026 | 365 (52.1) | 274 (39.1) | 61 (8.7)   | 1.15 (1.02 - 1.29) |
| 1.28 (0.98 - 1.66)  | 0.0677 | 413 (59.0) | 246 (35.1) | 41 (5.9)   | 1.16 (1.02 - 1.31) |
| 1.16 (0.88 - 1.53)  | 0.2932 | 426 (60.8) | 242 (34.5) | 33 (4.7)   | 0.95 (0.83 - 1.08) |
| 1.21 (1.00 - 1.47)  | 0.0546 | 330 (47.1) | 295 (42.1) | 76 (10.8)  | 1.10 (0.98 - 1.23) |
| 1.05 (0.90 - 1.22)  | 0.5523 | 211 (30.1) | 364 (52.0) | 125 (17.9) | 1.09 (0.98 - 1.22) |
| 1.11 (0.85 - 1.44)  | 0.4362 | 420 (60.0) | 244 (34.9) | 36 (5.1)   | 1.15 (1.01 - 1.30) |
| 1.28 (0.87 - 1.88)  | 0.2043 | 469 (66.9) | 212 (30.2) | 20 (2.9)   | 1.10 (0.96 - 1.26) |
| 1.52 (1.04 - 2.24)  | 0.0312 | 485 (69.3) | 197 (28.1) | 18 (2.6)   | 1.06 (0.91 - 1.22) |
| 0.95 (0.77 - 1.16)  | 0.5969 | 332 (47.4) | 302 (43.1) | 66 (9.4)   | 1.04 (0.93 - 1.16) |
| 0.81 (0.34 - 1.95)  | 0.6375 | 577 (82.4) | 120 (17.1) | 3 (0.4)    | 1.03 (0.86 - 1.25) |
| 1.01 (0.82 - 1.26)  | 0.8938 | 353 (50.4) | 293 (41.9) | 54 (7.7)   | 1.03 (0.92 - 1.16) |
| 0.81 (0.33 - 1.94)  | 0.6323 | 587 (83.9) | 110 (15.7) | 3 (0.4)    | 1.08 (0.89 - 1.31) |
| 1.38 (0.94 - 2.03)  | 0.0973 | 506 (72.4) | 174 (24.9) | 19 (2.7)   | 1.08 (0.93 - 1.25) |
| 0.88 (0.72 - 1.09)  | 0.244  | 352 (50.2) | 290 (41.4) | 59 (8.4)   | 1.12 (1.00 - 1.26) |
| 1.03 (0.58 - 1.83)  | 0.912  | 552 (79.1) | 138 (19.8) | 8 (1.1)    | 1.09 (0.92 - 1.28) |
| 0.98 (0.68 - 1.43)  | 0.9361 | 460 (65.7) | 224 (32.0) | 16 (2.3)   | 1.17 (1.02 - 1.34) |
| 1.90 (1.10 - 3.29)  | 0.0218 | 558 (80.2) | 131 (18.8) | 7 (1.0)    | 1.04 (0.87 - 1.24) |
| 0.93 (0.81 - 1.07)  | 0.2906 | 177 (25.3) | 349 (49.9) | 174 (24.9) | 0.94 (0.84 - 1.04) |
| 1.18 (0.99 - 1.40)  | 0.0729 | 305 (43.6) | 296 (42.3) | 98 (14.0)  | 1.05 (0.94 - 1.16) |
| 0.98 (0.85 - 1.14)  | 0.7979 | 213 (30.4) | 336 (47.9) | 152 (21.7) | 0.95 (0.86 - 1.06) |
| 1.39 (1.03 - 1.87)  | 0.0323 | 451 (64.3) | 222 (31.7) | 28 (4.0)   | 1.12 (0.98 - 1.28) |
| 1.10 (0.89 - 1.36)  | 0.3783 | 356 (50.9) | 286 (40.9) | 58 (8.3)   | 1.09 (0.97 - 1.22) |
| 0.83 (0.65 - 1.05)  | 0.1246 | 392 (56.2) | 265 (38.0) | 41 (5.9)   | 1.03 (0.91 - 1.16) |
| 1.15 (0.87 - 1.53)  | 0.3273 | 418 (59.7) | 254 (36.3) | 28 (4.0)   | 1.04 (0.91 - 1.18) |
| 1.10 (0.73 - 1.67)  | 0.6393 | 527 (75.4) | 156 (22.3) | 16 (2.3)   | 1.17 (1.01 - 1.36) |
| 1.21 (0.83 - 1.75)  | 0.3145 | 495 (70.6) | 186 (26.5) | 20 (2.9)   | 0.96 (0.83 - 1.11) |
| 0.43 (0.16 - 1.15)  | 0.0924 | 612 (87.6) | 84 (12.0)  | 3 (0.4)    | 1.09 (0.89 - 1.33) |
| 0.83 (0.63 - 1.08)  | 0.1609 | 417 (59.6) | 250 (35.7) | 33 (4.7)   | 1.03 (0.91 - 1.17) |
| 0.98 (0.81 - 1.18)  | 0.7952 | 335 (47.9) | 289 (41.3) | 76 (10.9)  | 0.97 (0.87 - 1.08) |
| 1.10 (0.84 - 1.43)  | 0.4785 | 418 (59.9) | 243 (34.8) | 37 (5.3)   | 1.15 (1.02 - 1.30) |
| 1.05 (0.77 - 1.42)  | 0.753  | 467 (66.7) | 209 (29.9) | 24 (3.4)   | 1.10 (0.96 - 1.26) |
| 0.70 (0.31 - 1.57)  | 0.3877 | 630 (90.0) | 66 (9.4)   | 4 (0.6)    | 0.90 (0.72 - 1.13) |
| 0.99 (0.82 - 1.19)  | 0.9345 | 306 (43.7) | 313 (44.7) | 81 (11.6)  | 1.04 (0.94 - 1.16) |
| 0.74 (0.31 - 1.78)  | 0.5008 | 641 (91.4) | 57 (8.1)   | 3 (0.4)    | 1.24 (0.98 - 1.56) |
| 1.10 (0.89 - 1.37)  | 0.3775 | 377 (54.0) | 271 (38.8) | 50 (7.2)   | 1.10 (0.98 - 1.24) |
| 2.60 (0.65 - 10.42) | 0.1787 | 616 (88.0) | 83 (11.9)  | 1 (0.1)    | 0.98 (0.78 - 1.23) |
| 4.56 (1.89 - 11.04) | 0.0008 | 625 (89.4) | 71 (10.2)  | 3 (0.4)    | 1.10 (0.87 - 1.40) |
| 0.99 (0.49 - 1.98)  | 0.969  | 608 (86.7) | 87 (12.4)  | 6 (0.9)    | 0.87 (0.72 - 1.07) |
| 1.00 (0.45 - 2.23)  | 0.9941 | 589 (84.0) | 110 (15.7) | 2 (0.3)    | 1.26 (1.04 - 1.54) |
| 1.83 (0.46 - 7.34)  | 0.3933 | 630 (90.0) | 68 (9.7)   | 2 (0.3)    | 1.13 (0.89 - 1.43) |
| 0.78 (0.48 - 1.28)  | 0.3266 | 526 (75.1) | 164 (23.4) | 10 (1.4)   | 1.02 (0.87 - 1.18) |
| 2.37 (1.42 - 3.96)  | 0.001  | 556 (79.3) | 141 (20.1) | 4 (0.6)    | 1.01 (0.85 - 1.21) |
| 0.92 (0.47 - 1.76)  | 0.791  | 543 (77.5) | 155 (22.1) | 3 (0.4)    | 0.98 (0.83 - 1.17) |
| 1.82 (1.14 - 2.90)  | 0.0123 | 495 (70.8) | 192 (27.5) | 12 (1.7)   | 1.11 (0.95 - 1.29) |
| 1.51 (0.96 - 2.38)  | 0.0749 | 526 (75.0) | 165 (23.5) | 10 (1.4)   | 1.13 (0.96 - 1.33) |
| 0.80 (0.44 - 1.44)  | 0.4502 | 570 (81.3) | 124 (17.7) | 7 (1.0)    | 0.90 (0.75 - 1.07) |
| 0.91 (0.79 - 1.06)  | 0.2185 | 195 (27.9) | 360 (51.5) | 144 (20.6) | 0.94 (0.85 - 1.05) |
| 1.49 (0.74 - 2.99)  | 0.2628 | 561 (80.0) | 135 (19.3) | 5 (0.7)    | 1.16 (0.97 - 1.39) |
| 1.06 (0.91 - 1.24)  | 0.4512 | 240 (34.3) | 344 (49.1) | 116 (16.6) | 1.06 (0.95 - 1.17) |
| 1.09 (0.45 - 2.63)  | 0.843  | 605 (86.3) | 93 (13.3)  | 3 (0.4)    | 1.21 (0.99 - 1.49) |
| 1.09 (0.72 - 1.63)  | 0.6896 | 498 (71.1) | 188 (26.9) | 14 (2.0)   | 0.96 (0.83 - 1.12) |
| 1.06 (0.90 - 1.24)  | 0.4998 | 243 (34.9) | 340 (48.8) | 114 (16.4) | 1.06 (0.95 - 1.18) |



|                    |        |            |            |            |                    |
|--------------------|--------|------------|------------|------------|--------------------|
| 0.64 (0.33 - 1.24) | 0.1893 | 571 (81.6) | 127 (18.1) | 2 (0.3)    | 0.98 (0.81 - 1.18) |
| 1.00 (0.86 - 1.17) | 0.9602 | 211 (30.1) | 349 (49.9) | 140 (20.0) | 0.97 (0.87 - 1.07) |
| 0.85 (0.68 - 1.07) | 0.1675 | 383 (54.7) | 266 (38.0) | 51 (7.3)   | 1.01 (0.90 - 1.13) |
| 0.86 (0.73 - 1.01) | 0.0668 | 272 (38.9) | 319 (45.6) | 109 (15.6) | 0.96 (0.86 - 1.06) |
| 1.04 (0.90 - 1.19) | 0.6087 | 184 (26.3) | 357 (51.0) | 159 (22.7) | 1.05 (0.95 - 1.17) |
| 0.94 (0.78 - 1.13) | 0.5183 | 317 (45.2) | 300 (42.8) | 84 (12.0)  | 0.98 (0.88 - 1.09) |
| 0.87 (0.49 - 1.53) | 0.6192 | 568 (81.0) | 125 (17.8) | 8 (1.1)    | 0.91 (0.76 - 1.08) |
| 1.36 (0.44 - 4.24) | 0.5911 | 608 (87.0) | 89 (12.7)  | 2 (0.3)    | 0.95 (0.77 - 1.18) |
| 2.06 (0.86 - 4.97) | 0.1066 | 578 (82.8) | 116 (16.6) | 4 (0.6)    | 0.98 (0.81 - 1.19) |
| 2.46 (0.79 - 7.64) | 0.1208 | 608 (86.9) | 90 (12.9)  | 2 (0.3)    | 1.13 (0.91 - 1.40) |
| 0.93 (0.75 - 1.15) | 0.4967 | 363 (51.8) | 279 (39.8) | 59 (8.4)   | 0.97 (0.87 - 1.09) |
| 0.99 (0.77 - 1.28) | 0.9385 | 362 (51.6) | 300 (42.8) | 39 (5.6)   | 0.95 (0.84 - 1.08) |
| 1.41 (0.45 - 4.40) | 0.55   | 591 (84.3) | 108 (15.4) | 2 (0.3)    | 1.02 (0.83 - 1.25) |
| 1.20 (0.93 - 1.55) | 0.1697 | 411 (58.6) | 249 (35.5) | 41 (5.8)   | 1.07 (0.94 - 1.21) |
| 0.84 (0.21 - 3.36) | 0.8048 | 651 (93.0) | 48 (6.9)   | 1 (0.1)    | 0.94 (0.71 - 1.24) |
| 1.11 (0.93 - 1.32) | 0.2633 | 271 (38.7) | 348 (49.6) | 82 (11.7)  | 1.04 (0.93 - 1.17) |
| 0.69 (0.37 - 1.29) | 0.2446 | 583 (83.2) | 114 (16.3) | 4 (0.6)    | 0.92 (0.77 - 1.11) |
| 0.86 (0.39 - 1.93) | 0.7214 | 573 (81.7) | 124 (17.7) | 4 (0.6)    | 1.01 (0.85 - 1.21) |
| 0.92 (0.80 - 1.07) | 0.2857 | 190 (27.1) | 363 (51.8) | 148 (21.1) | 0.94 (0.85 - 1.05) |
| 0.86 (0.61 - 1.21) | 0.3806 | 495 (70.7) | 183 (26.1) | 22 (3.1)   | 0.92 (0.80 - 1.06) |
| 0.89 (0.67 - 1.19) | 0.4465 | 432 (62.0) | 234 (33.6) | 31 (4.4)   | 0.94 (0.83 - 1.07) |
| 0.98 (0.77 - 1.25) | 0.8584 | 425 (60.6) | 233 (33.2) | 43 (6.1)   | 0.94 (0.84 - 1.06) |
| 1.06 (0.85 - 1.33) | 0.6001 | 344 (49.1) | 305 (43.6) | 51 (7.3)   | 0.93 (0.82 - 1.05) |
| 1.07 (0.85 - 1.33) | 0.5754 | 366 (52.2) | 285 (40.7) | 50 (7.1)   | 1.06 (0.94 - 1.20) |
| 0.93 (0.78 - 1.11) | 0.3975 | 260 (37.1) | 351 (50.1) | 89 (12.7)  | 0.93 (0.83 - 1.04) |
| 2.06 (0.77 - 5.50) | 0.1501 | 631 (90.0) | 68 (9.7)   | 2 (0.3)    | 0.91 (0.71 - 1.15) |
| 0.99 (0.84 - 1.16) | 0.9047 | 244 (34.8) | 351 (50.1) | 106 (15.1) | 0.99 (0.88 - 1.11) |
| 0.83 (0.66 - 1.04) | 0.0998 | 387 (55.2) | 266 (37.9) | 48 (6.8)   | 1.03 (0.92 - 1.16) |
| 1.11 (0.82 - 1.50) | 0.5055 | 424 (60.5) | 246 (35.1) | 31 (4.4)   | 1.05 (0.92 - 1.20) |
| 0.83 (0.59 - 1.17) | 0.2905 | 496 (70.8) | 183 (26.1) | 22 (3.1)   | 0.92 (0.80 - 1.06) |
| 0.99 (0.75 - 1.32) | 0.9668 | 425 (60.7) | 241 (34.4) | 34 (4.9)   | 0.94 (0.82 - 1.06) |
| 0.84 (0.63 - 1.12) | 0.2395 | 451 (64.5) | 216 (30.9) | 32 (4.6)   | 0.96 (0.84 - 1.09) |
| 0.78 (0.53 - 1.14) | 0.2028 | 509 (73.0) | 170 (24.4) | 18 (2.6)   | 0.90 (0.78 - 1.04) |
| 0.84 (0.60 - 1.19) | 0.3282 | 494 (70.5) | 186 (26.5) | 21 (3.0)   | 0.91 (0.79 - 1.05) |
| 0.71 (0.18 - 2.84) | 0.6262 | 643 (91.9) | 55 (7.9)   | 2 (0.3)    | 1.11 (0.86 - 1.42) |
| 0.66 (0.27 - 1.58) | 0.3462 | 610 (87.1) | 88 (12.6)  | 2 (0.3)    | 0.91 (0.73 - 1.13) |

| AAO_Men Trend P-value | AAO_Men Dominant Model HR (95%CI) | AAO_Men Dominant P-value | AAO_Men Recessive Model HR (95%CI) | AAO_Men Recessive P-value | AAO_Women Genotype n(%) 1/1 Cases |
|-----------------------|-----------------------------------|--------------------------|------------------------------------|---------------------------|-----------------------------------|
| 0.6606                | 0.92 (0.79 - 1.07)                | 0.2872                   | 1.07 (0.87 - 1.32)                 | 0.5313                    | 145 (37.6)                        |
| 0.1123                | 1.18 (1.01 - 1.39)                | 0.0369                   | 1.04 (0.86 - 1.25)                 | 0.7041                    | 139 (35.6)                        |
| 0.6022                | 0.97 (0.79 - 1.17)                | 0.7245                   | 0.73 (0.33 - 1.63)                 | 0.4415                    | 329 (84.4)                        |
| 0.3807                | 1.13 (0.86 - 1.51)                | 0.3807                   | ( - )                              | --                        | 348 (89.5)                        |
| 0.8144                | 0.97 (0.82 - 1.15)                | 0.7259                   | 1.00 (0.84 - 1.19)                 | 0.9753                    | 110 (28.3)                        |
| 0.4173                | 0.99 (0.84 - 1.15)                | 0.8627                   | 0.88 (0.72 - 1.07)                 | 0.197                     | 128 (32.8)                        |
| 0.9373                | 1.00 (0.85 - 1.17)                | 1                        | 0.99 (0.82 - 1.19)                 | 0.8942                    | 107 (27.4)                        |
| 0.1416                | 0.88 (0.74 - 1.06)                | 0.1697                   | 0.79 (0.47 - 1.32)                 | 0.3644                    | 284 (73.0)                        |
| 0.5841                | 1.05 (0.90 - 1.22)                | 0.5649                   | 1.03 (0.85 - 1.25)                 | 0.7716                    | 140 (36.1)                        |
| 0.9329                | 1.00 (0.85 - 1.17)                | 0.9776                   | 0.99 (0.82 - 1.19)                 | 0.908                     | 107 (27.4)                        |
| 0.0085                | 1.36 (1.07 - 1.74)                | 0.0129                   | 3.26 (0.81 - 13.08)                | 0.0954                    | 350 (89.7)                        |
| 0.8029                | 0.96 (0.80 - 1.14)                | 0.635                    | 1.54 (0.73 - 3.25)                 | 0.254                     | 286 (73.5)                        |
| 0.1795                | 0.87 (0.73 - 1.05)                | 0.1505                   | 1.81 (0.45 - 7.28)                 | 0.4009                    | 315 (81.0)                        |
| 0.8553                | 1.00 (0.86 - 1.17)                | 0.9619                   | 0.92 (0.67 - 1.25)                 | 0.5808                    | 236 (60.7)                        |
| 0.256                 | 1.10 (0.90 - 1.35)                | 0.3508                   | 2.22 (0.83 - 5.95)                 | 0.1116                    | 328 (84.1)                        |
| 0.9347                | 0.98 (0.82 - 1.16)                | 0.7797                   | 1.39 (0.69 - 2.79)                 | 0.3534                    | 298 (76.4)                        |
| 0.5985                | 0.96 (0.82 - 1.13)                | 0.6413                   | 0.93 (0.62 - 1.38)                 | 0.703                     | 256 (65.6)                        |
| 0.4605                | 1.00 (0.86 - 1.16)                | 0.95                     | 0.80 (0.60 - 1.06)                 | 0.1181                    | 199 (51.0)                        |
| 0.8898                | 0.99 (0.85 - 1.16)                | 0.9184                   | 0.97 (0.62 - 1.51)                 | 0.8775                    | 254 (65.1)                        |
| 0.1096                | 0.86 (0.73 - 1.02)                | 0.0852                   | 0.92 (0.77 - 1.10)                 | 0.3757                    | 98 (25.1)                         |
| 0.7952                | 1.01 (0.80 - 1.27)                | 0.9521                   | 0.40 (0.10 - 1.62)                 | 0.2013                    | 340 (87.2)                        |
| 0.9219                | 0.98 (0.82 - 1.16)                | 0.8013                   | 1.04 (0.87 - 1.23)                 | 0.6791                    | 98 (25.3)                         |
| 0.4216                | 1.09 (0.89 - 1.32)                | 0.4124                   | 1.09 (0.56 - 2.11)                 | 0.8043                    | 329 (84.4)                        |
| 0.2912                | 0.93 (0.79 - 1.09)                | 0.3737                   | 0.92 (0.76 - 1.12)                 | 0.4059                    | 133 (34.1)                        |
| 0.9287                | 1.00 (0.86 - 1.16)                | 0.9612                   | 0.98 (0.71 - 1.35)                 | 0.8979                    | 213 (54.6)                        |
| 0.0442                | 1.18 (1.00 - 1.39)                | 0.0441                   | 1.20 (0.72 - 2.01)                 | 0.4823                    | 257 (66.1)                        |
| 0.777                 | 1.00 (0.86 - 1.16)                | 0.9672                   | 0.93 (0.73 - 1.19)                 | 0.5873                    | 164 (42.2)                        |
| 0.1645                | 1.09 (0.93 - 1.26)                | 0.289                    | 1.28 (0.91 - 1.80)                 | 0.1583                    | 247 (63.3)                        |
| 0.1816                | 0.90 (0.77 - 1.04)                | 0.1543                   | 0.93 (0.70 - 1.23)                 | 0.6106                    | 220 (56.4)                        |
| 0.9805                | 1.01 (0.85 - 1.20)                | 0.8964                   | 0.99 (0.84 - 1.18)                 | 0.9287                    | 102 (26.2)                        |
| 0.1854                | 0.90 (0.77 - 1.05)                | 0.1956                   | 0.92 (0.75 - 1.13)                 | 0.4281                    | 136 (34.9)                        |
| 0.4262                | 1.03 (0.88 - 1.20)                | 0.7038                   | 1.44 (0.93 - 2.22)                 | 0.1022                    | 262 (67.4)                        |
| 0.8729                | 1.03 (0.89 - 1.20)                | 0.6638                   | 0.89 (0.71 - 1.12)                 | 0.3384                    | 189 (48.6)                        |
| 0.0312                | 1.23 (1.04 - 1.46)                | 0.0138                   | 1.02 (0.63 - 1.65)                 | 0.9363                    | 294 (75.6)                        |
| 0.729                 | 1.00 (0.85 - 1.16)                | 0.953                    | 0.87 (0.61 - 1.23)                 | 0.4309                    | 241 (61.8)                        |
| 0.0022                | 1.37 (1.07 - 1.75)                | 0.0117                   | 2.84 (1.46 - 5.50)                 | 0.002                     | 345 (89.8)                        |
| 0.0664                | 0.86 (0.70 - 1.04)                | 0.1221                   | 0.63 (0.35 - 1.11)                 | 0.1091                    | 305 (78.2)                        |
| 0.3349                | 0.94 (0.78 - 1.14)                | 0.5438                   | 0.67 (0.38 - 1.19)                 | 0.1721                    | 325 (83.3)                        |
| 0.7387                | 0.93 (0.75 - 1.16)                | 0.5457                   | 5.09 (1.62 - 15.95)                | 0.0052                    | 334 (86.1)                        |
| 0.0304                | 1.51 (1.07 - 2.12)                | 0.0179                   | 0.83 (0.12 - 5.89)                 | 0.8497                    | 365 (93.6)                        |
| 0.6021                | 0.94 (0.76 - 1.15)                | 0.5196                   | 2.35 (0.59 - 9.43)                 | 0.2283                    | 337 (86.4)                        |
| 0.3539                | 1.05 (0.91 - 1.22)                | 0.4888                   | 1.12 (0.87 - 1.44)                 | 0.3812                    | 197 (50.6)                        |
| 0.2905                | 0.90 (0.77 - 1.06)                | 0.2131                   | 1.00 (0.68 - 1.49)                 | 0.9831                    | 261 (67.3)                        |
| 0.9338                | 1.07 (0.91 - 1.24)                | 0.4162                   | 0.91 (0.75 - 1.12)                 | 0.377                     | 139 (35.6)                        |
| 0.4666                | 1.05 (0.89 - 1.24)                | 0.5567                   | 1.06 (0.88 - 1.26)                 | 0.5475                    | 119 (30.6)                        |
| 0.0014                | 1.25 (1.08 - 1.46)                | 0.0032                   | 1.34 (1.01 - 1.76)                 | 0.0403                    | 198 (50.8)                        |
| 0.3972                | 1.04 (0.90 - 1.21)                | 0.6018                   | 1.16 (0.88 - 1.54)                 | 0.2938                    | 184 (47.2)                        |
| 0.3776                | 1.05 (0.89 - 1.24)                | 0.5808                   | 2.09 (1.04 - 4.21)                 | 0.0385                    | 286 (73.3)                        |

|        |                    |        |                     |        |            |
|--------|--------------------|--------|---------------------|--------|------------|
| 0.8691 | 1.02 (0.87 - 1.21) | 0.7776 | 0.89 (0.48 - 1.67)  | 0.7248 | 280 (72.0) |
| 0.0195 | 1.16 (1.00 - 1.35) | 0.0499 | 1.29 (0.99 - 1.68)  | 0.0587 | 178 (45.9) |
| 0.0236 | 1.13 (0.97 - 1.32) | 0.1094 | 1.52 (1.11 - 2.09)  | 0.0094 | 238 (61.0) |
| 0.411  | 0.93 (0.80 - 1.08) | 0.3275 | 1.00 (0.70 - 1.42)  | 1      | 228 (58.5) |
| 0.1126 | 1.07 (0.92 - 1.24) | 0.382  | 1.29 (1.01 - 1.64)  | 0.0388 | 210 (53.8) |
| 0.1181 | 1.11 (0.95 - 1.31) | 0.1885 | 1.13 (0.93 - 1.37)  | 0.2294 | 120 (30.8) |
| 0.0316 | 1.17 (1.00 - 1.36) | 0.0477 | 1.26 (0.90 - 1.77)  | 0.1753 | 240 (61.5) |
| 0.1801 | 1.11 (0.95 - 1.30) | 0.1873 | 1.14 (0.73 - 1.78)  | 0.5625 | 249 (63.8) |
| 0.4557 | 1.03 (0.88 - 1.21) | 0.7264 | 1.48 (0.92 - 2.36)  | 0.1038 | 263 (67.6) |
| 0.5092 | 1.05 (0.90 - 1.22) | 0.5272 | 1.05 (0.81 - 1.35)  | 0.7059 | 157 (40.4) |
| 0.7241 | 1.03 (0.85 - 1.26) | 0.7484 | 1.17 (0.38 - 3.63)  | 0.7894 | 321 (82.5) |
| 0.614  | 1.01 (0.87 - 1.18) | 0.8507 | 1.13 (0.85 - 1.49)  | 0.3925 | 183 (46.9) |
| 0.4233 | 1.08 (0.89 - 1.33) | 0.4307 | 1.16 (0.37 - 3.61)  | 0.7977 | 327 (83.8) |
| 0.2969 | 1.07 (0.90 - 1.26) | 0.4426 | 1.34 (0.85 - 2.11)  | 0.2109 | 281 (72.2) |
| 0.042  | 1.23 (1.06 - 1.43) | 0.0061 | 0.98 (0.75 - 1.28)  | 0.88   | 178 (45.6) |
| 0.3298 | 1.11 (0.93 - 1.34) | 0.2437 | 0.89 (0.44 - 1.79)  | 0.7489 | 296 (76.1) |
| 0.0263 | 1.21 (1.04 - 1.42) | 0.0168 | 1.07 (0.65 - 1.76)  | 0.7898 | 270 (69.2) |
| 0.6739 | 1.03 (0.85 - 1.24) | 0.7855 | 1.34 (0.64 - 2.84)  | 0.437  | 306 (78.7) |
| 0.2242 | 0.91 (0.77 - 1.08) | 0.2887 | 0.92 (0.78 - 1.09)  | 0.3555 | 103 (26.4) |
| 0.4234 | 1.02 (0.88 - 1.18) | 0.8012 | 1.15 (0.93 - 1.42)  | 0.2057 | 163 (41.9) |
| 0.3674 | 0.90 (0.77 - 1.06) | 0.2241 | 0.98 (0.82 - 1.17)  | 0.8273 | 101 (26.0) |
| 0.0957 | 1.10 (0.95 - 1.29) | 0.2069 | 1.41 (0.97 - 2.06)  | 0.0745 | 253 (64.9) |
| 0.1509 | 1.12 (0.97 - 1.30) | 0.1306 | 1.09 (0.83 - 1.42)  | 0.5519 | 171 (43.8) |
| 0.6236 | 1.09 (0.94 - 1.27) | 0.2562 | 0.85 (0.62 - 1.16)  | 0.3093 | 198 (50.9) |
| 0.5657 | 1.04 (0.90 - 1.22) | 0.5691 | 1.05 (0.72 - 1.53)  | 0.8062 | 231 (59.4) |
| 0.0331 | 1.23 (1.03 - 1.46) | 0.0205 | 1.10 (0.67 - 1.81)  | 0.705  | 294 (75.4) |
| 0.5721 | 0.95 (0.81 - 1.12) | 0.5174 | 1.00 (0.64 - 1.56)  | 1      | 281 (72.1) |
| 0.422  | 1.19 (0.95 - 1.49) | 0.128  | 0.38 (0.12 - 1.17)  | 0.0916 | 310 (80.1) |
| 0.6076 | 1.08 (0.93 - 1.26) | 0.2941 | 0.85 (0.60 - 1.21)  | 0.3652 | 216 (55.4) |
| 0.5654 | 0.94 (0.81 - 1.09) | 0.4376 | 1.00 (0.79 - 1.27)  | 1      | 165 (42.4) |
| 0.028  | 1.19 (1.02 - 1.38) | 0.0269 | 1.18 (0.85 - 1.64)  | 0.3314 | 221 (57.0) |
| 0.1556 | 1.15 (0.98 - 1.35) | 0.0835 | 0.97 (0.65 - 1.46)  | 0.8941 | 246 (63.1) |
| 0.3692 | 0.92 (0.72 - 1.18) | 0.523  | 0.56 (0.21 - 1.49)  | 0.2443 | 350 (90.0) |
| 0.44   | 1.08 (0.93 - 1.25) | 0.3221 | 1.01 (0.80 - 1.27)  | 0.9438 | 178 (45.8) |
| 0.0711 | 1.37 (1.05 - 1.79) | 0.0195 | 0.63 (0.20 - 1.97)  | 0.4277 | 350 (90.0) |
| 0.113  | 1.14 (0.98 - 1.32) | 0.0947 | 1.09 (0.82 - 1.46)  | 0.5389 | 203 (52.3) |
| 0.8689 | 0.97 (0.77 - 1.22) | 0.7925 | 7.09 (0.99 - 50.84) | 0.0512 | 338 (86.7) |
| 0.4115 | 1.06 (0.84 - 1.36) | 0.6091 | 6.44 (2.05 - 20.24) | 0.0014 | 345 (88.5) |
| 0.1899 | 0.87 (0.70 - 1.08) | 0.1971 | 0.80 (0.36 - 1.78)  | 0.5769 | 335 (85.9) |
| 0.0201 | 1.28 (1.04 - 1.57) | 0.0176 | 1.11 (0.28 - 4.44)  | 0.8857 | 333 (85.6) |
| 0.3305 | 1.12 (0.87 - 1.43) | 0.3783 | 1.81 (0.45 - 7.28)  | 0.4008 | 338 (86.9) |
| 0.8488 | 1.04 (0.88 - 1.24) | 0.6318 | 0.77 (0.41 - 1.44)  | 0.4078 | 272 (69.7) |
| 0.9175 | 1.00 (0.83 - 1.20) | 0.9752 | 1.59 (0.59 - 4.24)  | 0.3585 | 297 (76.5) |
| 0.8547 | 1.00 (0.84 - 1.19) | 0.9881 | 0.60 (0.19 - 1.87)  | 0.3811 | 291 (74.6) |
| 0.1872 | 1.08 (0.92 - 1.28) | 0.3314 | 1.74 (0.98 - 3.08)  | 0.0592 | 272 (69.7) |
| 0.1331 | 1.11 (0.94 - 1.32) | 0.2159 | 1.66 (0.89 - 3.11)  | 0.1115 | 290 (74.4) |
| 0.2274 | 0.90 (0.74 - 1.09) | 0.2804 | 0.72 (0.34 - 1.51)  | 0.3859 | 332 (85.1) |
| 0.2587 | 0.96 (0.81 - 1.13) | 0.5916 | 0.88 (0.73 - 1.06)  | 0.1812 | 129 (33.2) |
| 0.0936 | 1.17 (0.97 - 1.41) | 0.0937 | 1.22 (0.50 - 2.93)  | 0.6634 | 314 (80.5) |
| 0.3158 | 1.11 (0.94 - 1.29) | 0.2099 | 1.03 (0.84 - 1.25)  | 0.7993 | 120 (30.8) |
| 0.0648 | 1.24 (1.00 - 1.54) | 0.054  | 1.06 (0.34 - 3.29)  | 0.9236 | 327 (83.8) |
| 0.5939 | 0.94 (0.79 - 1.10) | 0.4294 | 1.23 (0.72 - 2.08)  | 0.4504 | 295 (75.6) |
| 0.3021 | 1.12 (0.96 - 1.31) | 0.156  | 1.01 (0.83 - 1.24)  | 0.9165 | 120 (30.8) |

|        |                    |        |                      |        |            |
|--------|--------------------|--------|----------------------|--------|------------|
| 0.7967 | 0.97 (0.80 - 1.18) | 0.7746 | 1.14 (0.28 - 4.56)   | 0.8555 | 319 (81.8) |
| 0.5195 | 0.98 (0.84 - 1.15) | 0.8248 | 0.92 (0.76 - 1.11)   | 0.3833 | 140 (35.9) |
| 0.8468 | 1.10 (0.95 - 1.28) | 0.2154 | 0.78 (0.59 - 1.04)   | 0.0906 | 219 (56.3) |
| 0.3866 | 1.01 (0.86 - 1.17) | 0.9308 | 0.83 (0.67 - 1.02)   | 0.0784 | 156 (40.0) |
| 0.3392 | 1.14 (0.96 - 1.35) | 0.123  | 1.00 (0.84 - 1.19)   | 0.9719 | 102 (26.2) |
| 0.6968 | 1.02 (0.88 - 1.19) | 0.7523 | 0.86 (0.69 - 1.09)   | 0.2092 | 184 (47.2) |
| 0.2765 | 0.90 (0.75 - 1.09) | 0.2984 | 0.82 (0.41 - 1.65)   | 0.5784 | 329 (84.6) |
| 0.6363 | 0.94 (0.76 - 1.18) | 0.6139 | 1.09 (0.27 - 4.35)   | 0.9051 | 346 (88.9) |
| 0.8437 | 0.96 (0.79 - 1.17) | 0.6971 | 1.93 (0.72 - 5.15)   | 0.1919 | 334 (86.1) |
| 0.2584 | 1.12 (0.90 - 1.40) | 0.3078 | 2.25 (0.56 - 9.01)   | 0.2525 | 347 (89.2) |
| 0.6081 | 1.00 (0.86 - 1.16) | 0.9629 | 0.86 (0.66 - 1.13)   | 0.2813 | 212 (54.4) |
| 0.426  | 0.90 (0.78 - 1.04) | 0.1633 | 1.19 (0.86 - 1.65)   | 0.281  | 229 (58.7) |
| 0.8609 | 1.00 (0.81 - 1.22) | 0.9868 | 12.41 (3.05 - 50.57) | 0.0004 | 347 (89.0) |
| 0.3071 | 1.03 (0.88 - 1.19) | 0.7486 | 1.41 (1.03 - 1.94)   | 0.0334 | 232 (59.5) |
| 0.6692 | 0.96 (0.72 - 1.28) | 0.786  | 0.45 (0.06 - 3.19)   | 0.4222 | 359 (92.1) |
| 0.4796 | 1.02 (0.88 - 1.19) | 0.7923 | 1.13 (0.90 - 1.43)   | 0.2906 | 160 (41.1) |
| 0.3834 | 0.95 (0.78 - 1.16) | 0.6284 | 0.44 (0.16 - 1.19)   | 0.1062 | 323 (82.8) |
| 0.889  | 1.03 (0.85 - 1.25) | 0.7708 | 0.74 (0.27 - 1.97)   | 0.5411 | 315 (80.8) |
| 0.2764 | 0.95 (0.80 - 1.12) | 0.53   | 0.90 (0.75 - 1.08)   | 0.2479 | 116 (29.7) |
| 0.239  | 0.94 (0.79 - 1.10) | 0.4261 | 0.72 (0.47 - 1.12)   | 0.1485 | 264 (67.9) |
| 0.3762 | 0.97 (0.83 - 1.13) | 0.6915 | 0.76 (0.52 - 1.10)   | 0.1439 | 237 (60.9) |
| 0.3467 | 0.95 (0.82 - 1.11) | 0.5458 | 0.83 (0.61 - 1.14)   | 0.2582 | 220 (56.4) |
| 0.2405 | 0.89 (0.77 - 1.03) | 0.1253 | 1.02 (0.77 - 1.36)   | 0.8865 | 219 (56.2) |
| 0.3094 | 1.07 (0.92 - 1.24) | 0.4058 | 1.14 (0.85 - 1.52)   | 0.388  | 211 (54.1) |
| 0.1907 | 0.90 (0.78 - 1.05) | 0.1983 | 0.92 (0.73 - 1.15)   | 0.4593 | 168 (43.1) |
| 0.4279 | 0.89 (0.69 - 1.14) | 0.3558 | 1.90 (0.47 - 7.64)   | 0.3638 | 357 (91.5) |
| 0.8692 | 0.93 (0.79 - 1.09) | 0.3517 | 1.11 (0.90 - 1.36)   | 0.3358 | 130 (33.3) |
| 0.5885 | 1.09 (0.94 - 1.27) | 0.2578 | 0.88 (0.66 - 1.19)   | 0.4107 | 208 (53.3) |
| 0.4712 | 1.02 (0.88 - 1.19) | 0.8142 | 1.34 (0.94 - 1.93)   | 0.1097 | 238 (61.2) |
| 0.2645 | 0.94 (0.80 - 1.11) | 0.4633 | 0.73 (0.47 - 1.13)   | 0.1559 | 263 (67.6) |
| 0.3103 | 0.93 (0.80 - 1.08) | 0.3262 | 0.91 (0.64 - 1.29)   | 0.5951 | 224 (57.6) |
| 0.4831 | 0.97 (0.83 - 1.13) | 0.6915 | 0.83 (0.58 - 1.20)   | 0.3201 | 240 (61.7) |
| 0.1575 | 0.91 (0.77 - 1.08) | 0.2829 | 0.69 (0.43 - 1.13)   | 0.1406 | 273 (70.5) |
| 0.1811 | 0.92 (0.78 - 1.08) | 0.3138 | 0.73 (0.46 - 1.14)   | 0.1619 | 271 (69.7) |
| 0.4269 | 1.15 (0.87 - 1.50) | 0.3278 | 0.71 (0.18 - 2.85)   | 0.6304 | 358 (91.8) |
| 0.3844 | 0.90 (0.72 - 1.13) | 0.3654 | 1.04 (0.26 - 4.18)   | 0.9536 | 337 (86.4) |

| AAO_Women<br>Genotype n(%)<br>1/2<br>Cases | AAO_Women<br>Genotype n(%)<br>2/2<br>Cases | AAO_Women Trend<br>Model<br>HR (95%CI) | AAO_Women<br>Trend P-value | AAO_Women<br>Dominant Model<br>HR (95%CI) | AAO_Women<br>Dominant P-value |
|--------------------------------------------|--------------------------------------------|----------------------------------------|----------------------------|-------------------------------------------|-------------------------------|
| 181 (46.9)                                 | 60 (15.5)                                  | 1.01 (0.87 - 1.18)                     | 0.9006                     | 0.89 (0.73 - 1.10)                        | 0.289                         |
| 185 (47.4)                                 | 66 (16.9)                                  | 1.09 (0.95 - 1.26)                     | 0.2196                     | 1.10 (0.90 - 1.36)                        | 0.353                         |
| 59 (15.1)                                  | 2 (0.5)                                    | 1.02 (0.79 - 1.31)                     | 0.9057                     | 1.05 (0.80 - 1.38)                        | 0.7451                        |
| 41 (10.5)                                  | 0 (0.0)                                    | 0.76 (0.55 - 1.06)                     | 0.1102                     | 0.76 (0.55 - 1.06)                        | 0.1102                        |
| 200 (51.4)                                 | 79 (20.3)                                  | 1.05 (0.91 - 1.22)                     | 0.4719                     | 1.10 (0.88 - 1.37)                        | 0.4095                        |
| 197 (50.5)                                 | 65 (16.7)                                  | 0.98 (0.85 - 1.13)                     | 0.7573                     | 1.01 (0.82 - 1.25)                        | 0.9109                        |
| 208 (53.3)                                 | 75 (19.2)                                  | 0.96 (0.84 - 1.11)                     | 0.617                      | 1.05 (0.84 - 1.31)                        | 0.6712                        |
| 100 (25.7)                                 | 5 (1.3)                                    | 0.95 (0.78 - 1.18)                     | 0.6638                     | 0.96 (0.77 - 1.20)                        | 0.7277                        |
| 188 (48.5)                                 | 60 (15.5)                                  | 1.11 (0.95 - 1.29)                     | 0.1789                     | 1.08 (0.88 - 1.33)                        | 0.4787                        |
| 208 (53.3)                                 | 75 (19.2)                                  | 0.96 (0.84 - 1.11)                     | 0.617                      | 1.05 (0.84 - 1.31)                        | 0.6712                        |
| 37 (9.5)                                   | 3 (0.8)                                    | 1.25 (0.93 - 1.68)                     | 0.1464                     | 1.25 (0.90 - 1.74)                        | 0.1759                        |
| 98 (25.2)                                  | 5 (1.3)                                    | 0.83 (0.67 - 1.03)                     | 0.0886                     | 0.82 (0.65 - 1.03)                        | 0.085                         |
| 72 (18.5)                                  | 2 (0.5)                                    | 1.01 (0.79 - 1.29)                     | 0.9429                     | 1.00 (0.78 - 1.30)                        | 0.9708                        |
| 132 (33.9)                                 | 21 (5.4)                                   | 1.11 (0.93 - 1.31)                     | 0.2529                     | 1.08 (0.88 - 1.32)                        | 0.4632                        |
| 56 (14.4)                                  | 6 (1.5)                                    | 1.01 (0.79 - 1.29)                     | 0.9611                     | 0.97 (0.74 - 1.28)                        | 0.8287                        |
| 81 (20.8)                                  | 11 (2.8)                                   | 1.11 (0.90 - 1.37)                     | 0.3179                     | 1.07 (0.84 - 1.35)                        | 0.5904                        |
| 118 (30.3)                                 | 16 (4.1)                                   | 0.91 (0.77 - 1.09)                     | 0.3218                     | 0.90 (0.73 - 1.11)                        | 0.3208                        |
| 162 (41.5)                                 | 29 (7.4)                                   | 0.93 (0.79 - 1.09)                     | 0.3789                     | 0.89 (0.73 - 1.08)                        | 0.2297                        |
| 116 (29.7)                                 | 20 (5.1)                                   | 1.21 (1.02 - 1.44)                     | 0.0329                     | 1.20 (0.97 - 1.47)                        | 0.0948                        |
| 193 (49.5)                                 | 99 (25.4)                                  | 1.05 (0.91 - 1.21)                     | 0.5456                     | 0.98 (0.78 - 1.23)                        | 0.8617                        |
| 48 (12.3)                                  | 2 (0.5)                                    | 1.37 (1.02 - 1.83)                     | 0.0355                     | 1.32 (0.98 - 1.78)                        | 0.0671                        |
| 201 (51.9)                                 | 88 (22.7)                                  | 1.04 (0.91 - 1.20)                     | 0.5532                     | 1.10 (0.87 - 1.38)                        | 0.4351                        |
| 57 (14.6)                                  | 4 (1.0)                                    | 1.08 (0.84 - 1.40)                     | 0.53                       | 1.07 (0.82 - 1.41)                        | 0.6138                        |
| 190 (48.7)                                 | 67 (17.2)                                  | 1.02 (0.88 - 1.17)                     | 0.8254                     | 1.07 (0.87 - 1.32)                        | 0.5167                        |
| 156 (40.0)                                 | 21 (5.4)                                   | 0.88 (0.75 - 1.04)                     | 0.147                      | 0.88 (0.72 - 1.07)                        | 0.2019                        |
| 119 (30.6)                                 | 13 (3.3)                                   | 1.01 (0.84 - 1.21)                     | 0.941                      | 0.97 (0.79 - 1.20)                        | 0.7781                        |
| 175 (45.0)                                 | 50 (12.9)                                  | 0.92 (0.79 - 1.06)                     | 0.2579                     | 0.88 (0.72 - 1.08)                        | 0.2305                        |
| 126 (32.3)                                 | 17 (4.4)                                   | 1.11 (0.93 - 1.33)                     | 0.2568                     | 1.07 (0.87 - 1.31)                        | 0.5343                        |
| 142 (36.4)                                 | 28 (7.2)                                   | 0.97 (0.83 - 1.14)                     | 0.7455                     | 0.98 (0.80 - 1.20)                        | 0.8279                        |
| 199 (51.0)                                 | 89 (22.8)                                  | 1.09 (0.94 - 1.25)                     | 0.2549                     | 1.12 (0.90 - 1.41)                        | 0.3129                        |
| 195 (50.0)                                 | 59 (15.1)                                  | 0.99 (0.86 - 1.14)                     | 0.8903                     | 1.02 (0.83 - 1.26)                        | 0.8395                        |
| 122 (31.4)                                 | 5 (1.3)                                    | 1.02 (0.83 - 1.25)                     | 0.8635                     | 1.00 (0.81 - 1.24)                        | 0.9716                        |
| 162 (41.6)                                 | 38 (9.8)                                   | 1.10 (0.95 - 1.29)                     | 0.2086                     | 1.08 (0.88 - 1.31)                        | 0.4676                        |
| 83 (21.3)                                  | 12 (3.1)                                   | 1.15 (0.95 - 1.41)                     | 0.1594                     | 1.13 (0.89 - 1.42)                        | 0.3097                        |
| 131 (33.6)                                 | 18 (4.6)                                   | 0.86 (0.72 - 1.03)                     | 0.1018                     | 0.81 (0.66 - 1.00)                        | 0.0504                        |
| 32 (8.3)                                   | 7 (1.8)                                    | 1.23 (0.94 - 1.61)                     | 0.1405                     | 1.23 (0.88 - 1.72)                        | 0.2181                        |
| 81 (20.8)                                  | 4 (1.0)                                    | 0.92 (0.74 - 1.15)                     | 0.4516                     | 0.93 (0.73 - 1.18)                        | 0.5476                        |
| 62 (15.9)                                  | 3 (0.8)                                    | 0.85 (0.66 - 1.10)                     | 0.2252                     | 0.81 (0.62 - 1.06)                        | 0.1264                        |
| 50 (12.9)                                  | 4 (1.0)                                    | 1.26 (0.96 - 1.64)                     | 0.0913                     | 1.25 (0.93 - 1.67)                        | 0.135                         |
| 25 (6.4)                                   | 0 (0.0)                                    | 0.90 (0.60 - 1.35)                     | 0.6196                     | 0.90 (0.60 - 1.35)                        | 0.6196                        |
| 50 (12.8)                                  | 3 (0.8)                                    | 1.21 (0.93 - 1.57)                     | 0.1652                     | 1.23 (0.92 - 1.65)                        | 0.1587                        |
| 160 (41.1)                                 | 32 (8.2)                                   | 0.90 (0.77 - 1.06)                     | 0.2245                     | 0.83 (0.68 - 1.01)                        | 0.0671                        |
| 115 (29.6)                                 | 12 (3.1)                                   | 1.19 (0.99 - 1.43)                     | 0.0696                     | 1.19 (0.96 - 1.47)                        | 0.112                         |
| 182 (46.7)                                 | 69 (17.7)                                  | 1.04 (0.89 - 1.20)                     | 0.6391                     | 0.96 (0.78 - 1.18)                        | 0.6756                        |
| 188 (48.3)                                 | 82 (21.1)                                  | 1.14 (0.99 - 1.32)                     | 0.075                      | 1.12 (0.90 - 1.39)                        | 0.3228                        |
| 165 (42.3)                                 | 27 (6.9)                                   | 1.07 (0.91 - 1.25)                     | 0.4117                     | 1.13 (0.93 - 1.38)                        | 0.2202                        |
| 168 (43.1)                                 | 38 (9.7)                                   | 0.92 (0.79 - 1.07)                     | 0.2562                     | 0.91 (0.74 - 1.11)                        | 0.3286                        |
| 99 (25.4)                                  | 5 (1.3)                                    | 1.11 (0.90 - 1.37)                     | 0.3478                     | 1.09 (0.87 - 1.36)                        | 0.4578                        |

|            |           |                    |        |                    |        |
|------------|-----------|--------------------|--------|--------------------|--------|
| 95 (24.4)  | 14 (3.6)  | 1.05 (0.87 - 1.27) | 0.6081 | 1.02 (0.82 - 1.28) | 0.8301 |
| 177 (45.6) | 33 (8.5)  | 1.04 (0.89 - 1.21) | 0.6364 | 1.05 (0.86 - 1.29) | 0.6236 |
| 133 (34.1) | 19 (4.9)  | 1.02 (0.86 - 1.21) | 0.7944 | 1.05 (0.86 - 1.29) | 0.6301 |
| 142 (36.4) | 20 (5.1)  | 0.97 (0.81 - 1.17) | 0.7806 | 0.89 (0.73 - 1.09) | 0.2745 |
| 143 (36.7) | 37 (9.5)  | 1.03 (0.88 - 1.19) | 0.7447 | 1.02 (0.84 - 1.25) | 0.8371 |
| 185 (47.6) | 84 (21.6) | 0.96 (0.84 - 1.10) | 0.573  | 0.96 (0.77 - 1.19) | 0.7137 |
| 126 (32.3) | 24 (6.2)  | 0.80 (0.67 - 0.95) | 0.0118 | 0.73 (0.59 - 0.90) | 0.0032 |
| 134 (34.4) | 7 (1.8)   | 1.14 (0.94 - 1.39) | 0.1846 | 1.11 (0.91 - 1.37) | 0.308  |
| 117 (30.1) | 9 (2.3)   | 1.03 (0.84 - 1.25) | 0.7869 | 0.99 (0.80 - 1.23) | 0.9348 |
| 196 (50.4) | 36 (9.3)  | 0.89 (0.76 - 1.04) | 0.1409 | 0.90 (0.74 - 1.11) | 0.3204 |
| 66 (17.0)  | 2 (0.5)   | 0.71 (0.55 - 0.92) | 0.0083 | 0.70 (0.54 - 0.92) | 0.0091 |
| 169 (43.3) | 38 (9.7)  | 0.92 (0.79 - 1.07) | 0.2952 | 0.92 (0.75 - 1.12) | 0.4187 |
| 61 (15.6)  | 2 (0.5)   | 0.70 (0.54 - 0.91) | 0.0069 | 0.69 (0.53 - 0.91) | 0.0074 |
| 100 (25.7) | 8 (2.1)   | 1.04 (0.85 - 1.27) | 0.7135 | 1.01 (0.81 - 1.26) | 0.9193 |
| 171 (43.8) | 41 (10.5) | 0.91 (0.78 - 1.05) | 0.2032 | 0.94 (0.77 - 1.15) | 0.54   |
| 89 (22.9)  | 4 (1.0)   | 1.04 (0.83 - 1.30) | 0.7295 | 1.02 (0.81 - 1.29) | 0.8564 |
| 108 (27.7) | 12 (3.1)  | 0.83 (0.69 - 1.01) | 0.0592 | 0.80 (0.64 - 0.99) | 0.0439 |
| 77 (19.8)  | 6 (1.5)   | 1.16 (0.92 - 1.47) | 0.1959 | 1.10 (0.86 - 1.40) | 0.4358 |
| 192 (49.2) | 95 (24.4) | 0.93 (0.81 - 1.08) | 0.3516 | 0.90 (0.71 - 1.12) | 0.3385 |
| 181 (46.5) | 45 (11.6) | 1.09 (0.93 - 1.27) | 0.2816 | 1.07 (0.87 - 1.31) | 0.5195 |
| 213 (54.8) | 75 (19.3) | 0.94 (0.81 - 1.10) | 0.4552 | 0.89 (0.71 - 1.12) | 0.3168 |
| 120 (30.8) | 17 (4.4)  | 1.14 (0.95 - 1.35) | 0.1595 | 1.13 (0.92 - 1.40) | 0.242  |
| 184 (47.2) | 35 (9.0)  | 1.03 (0.88 - 1.20) | 0.7418 | 1.00 (0.82 - 1.22) | 1      |
| 162 (41.6) | 29 (7.5)  | 0.91 (0.78 - 1.07) | 0.2442 | 0.92 (0.76 - 1.13) | 0.4357 |
| 135 (34.7) | 23 (5.9)  | 0.96 (0.81 - 1.14) | 0.6224 | 0.89 (0.73 - 1.09) | 0.2678 |
| 89 (22.8)  | 7 (1.8)   | 0.79 (0.64 - 0.99) | 0.0362 | 0.76 (0.60 - 0.96) | 0.0196 |
| 100 (25.6) | 9 (2.3)   | 0.96 (0.78 - 1.18) | 0.697  | 0.90 (0.72 - 1.12) | 0.3273 |
| 76 (19.6)  | 1 (0.3)   | 0.85 (0.67 - 1.09) | 0.2068 | 0.85 (0.66 - 1.09) | 0.2003 |
| 150 (38.5) | 24 (6.2)  | 0.91 (0.77 - 1.07) | 0.2521 | 0.92 (0.75 - 1.13) | 0.4187 |
| 178 (45.8) | 46 (11.8) | 0.98 (0.85 - 1.14) | 0.803  | 0.99 (0.81 - 1.22) | 0.9516 |
| 146 (37.6) | 21 (5.4)  | 1.08 (0.92 - 1.27) | 0.368  | 1.13 (0.92 - 1.38) | 0.2482 |
| 125 (32.1) | 19 (4.9)  | 1.10 (0.93 - 1.31) | 0.2556 | 1.12 (0.91 - 1.38) | 0.28   |
| 37 (9.5)   | 2 (0.5)   | 1.09 (0.80 - 1.50) | 0.5737 | 1.08 (0.77 - 1.50) | 0.6549 |
| 165 (42.4) | 46 (11.8) | 0.93 (0.80 - 1.08) | 0.3493 | 0.89 (0.73 - 1.09) | 0.2693 |
| 37 (9.5)   | 2 (0.5)   | 0.86 (0.63 - 1.18) | 0.3496 | 0.84 (0.60 - 1.18) | 0.3175 |
| 147 (37.9) | 38 (9.8)  | 0.94 (0.80 - 1.10) | 0.4047 | 0.87 (0.71 - 1.06) | 0.1599 |
| 51 (13.1)  | 1 (0.3)   | 0.69 (0.52 - 0.92) | 0.0125 | 0.68 (0.50 - 0.91) | 0.0097 |
| 43 (11.0)  | 2 (0.5)   | 0.85 (0.63 - 1.15) | 0.2986 | 0.82 (0.60 - 1.12) | 0.2063 |
| 53 (13.6)  | 2 (0.5)   | 0.88 (0.66 - 1.16) | 0.3553 | 0.85 (0.64 - 1.13) | 0.2568 |
| 52 (13.4)  | 4 (1.0)   | 0.99 (0.76 - 1.28) | 0.9291 | 0.99 (0.74 - 1.31) | 0.9357 |
| 51 (13.1)  | 0 (0.0)   | 0.94 (0.70 - 1.27) | 0.6927 | 0.94 (0.70 - 1.27) | 0.6927 |
| 112 (28.7) | 6 (1.5)   | 0.81 (0.66 - 1.00) | 0.0482 | 0.80 (0.64 - 0.99) | 0.0418 |
| 80 (20.6)  | 11 (2.8)  | 1.27 (1.03 - 1.57) | 0.0244 | 1.20 (0.95 - 1.52) | 0.1336 |
| 93 (23.8)  | 6 (1.5)   | 0.82 (0.66 - 1.02) | 0.0741 | 0.78 (0.62 - 0.99) | 0.0404 |
| 112 (28.7) | 6 (1.5)   | 1.05 (0.86 - 1.30) | 0.6106 | 1.02 (0.82 - 1.27) | 0.8344 |
| 91 (23.3)  | 9 (2.3)   | 1.11 (0.91 - 1.36) | 0.3011 | 1.11 (0.88 - 1.39) | 0.3909 |
| 54 (13.8)  | 4 (1.0)   | 0.90 (0.69 - 1.16) | 0.4031 | 0.88 (0.67 - 1.17) | 0.3788 |
| 174 (44.7) | 86 (22.1) | 0.99 (0.87 - 1.14) | 0.9035 | 1.00 (0.81 - 1.24) | 0.9901 |
| 73 (18.7)  | 3 (0.8)   | 1.10 (0.86 - 1.40) | 0.454  | 1.07 (0.83 - 1.38) | 0.5939 |
| 197 (50.5) | 73 (18.7) | 1.02 (0.88 - 1.18) | 0.8328 | 0.95 (0.77 - 1.18) | 0.6645 |
| 61 (15.6)  | 2 (0.5)   | 1.14 (0.88 - 1.48) | 0.3071 | 1.16 (0.88 - 1.52) | 0.2952 |
| 85 (21.8)  | 10 (2.6)  | 0.94 (0.77 - 1.15) | 0.5525 | 0.93 (0.74 - 1.18) | 0.5575 |
| 195 (50.1) | 74 (19.0) | 1.02 (0.88 - 1.18) | 0.8045 | 0.95 (0.77 - 1.18) | 0.6545 |

|            |            |                    |        |                    |        |
|------------|------------|--------------------|--------|--------------------|--------|
| 64 (16.4)  | 7 (1.8)    | 0.91 (0.73 - 1.13) | 0.3987 | 0.95 (0.74 - 1.23) | 0.7174 |
| 181 (46.4) | 69 (17.7)  | 1.00 (0.86 - 1.16) | 0.9675 | 0.89 (0.72 - 1.09) | 0.2636 |
| 142 (36.5) | 28 (7.2)   | 1.05 (0.89 - 1.23) | 0.5683 | 1.07 (0.87 - 1.30) | 0.5334 |
| 175 (44.9) | 59 (15.1)  | 1.01 (0.88 - 1.16) | 0.8452 | 1.08 (0.88 - 1.32) | 0.4743 |
| 179 (45.9) | 109 (27.9) | 1.03 (0.89 - 1.18) | 0.7216 | 0.98 (0.78 - 1.23) | 0.8445 |
| 165 (42.3) | 41 (10.5)  | 1.05 (0.90 - 1.23) | 0.5101 | 1.03 (0.84 - 1.26) | 0.7759 |
| 56 (14.4)  | 4 (1.0)    | 0.88 (0.69 - 1.14) | 0.3341 | 0.87 (0.66 - 1.14) | 0.3092 |
| 42 (10.8)  | 1 (0.3)    | 0.95 (0.70 - 1.31) | 0.7701 | 0.94 (0.68 - 1.29) | 0.6873 |
| 53 (13.7)  | 1 (0.3)    | 0.93 (0.70 - 1.24) | 0.6196 | 0.91 (0.68 - 1.22) | 0.5504 |
| 41 (10.5)  | 1 (0.3)    | 1.03 (0.75 - 1.41) | 0.8492 | 1.01 (0.74 - 1.40) | 0.9357 |
| 145 (37.2) | 33 (8.5)   | 1.07 (0.91 - 1.24) | 0.4095 | 1.09 (0.89 - 1.33) | 0.4238 |
| 138 (35.4) | 23 (5.9)   | 0.88 (0.75 - 1.04) | 0.1308 | 0.89 (0.72 - 1.09) | 0.2569 |
| 42 (10.8)  | 1 (0.3)    | 0.94 (0.69 - 1.27) | 0.6731 | 0.95 (0.69 - 1.31) | 0.7655 |
| 137 (35.1) | 21 (5.4)   | 1.02 (0.86 - 1.20) | 0.8304 | 1.05 (0.86 - 1.29) | 0.6337 |
| 30 (7.7)   | 1 (0.3)    | 1.52 (1.06 - 2.19) | 0.0224 | 1.49 (1.03 - 2.16) | 0.0346 |
| 168 (43.2) | 61 (15.7)  | 1.07 (0.93 - 1.23) | 0.3279 | 1.11 (0.91 - 1.36) | 0.3072 |
| 61 (15.6)  | 6 (1.5)    | 1.16 (0.92 - 1.46) | 0.2015 | 1.20 (0.92 - 1.57) | 0.1725 |
| 73 (18.7)  | 2 (0.5)    | 0.89 (0.69 - 1.14) | 0.3492 | 0.87 (0.68 - 1.13) | 0.2999 |
| 184 (47.2) | 90 (23.1)  | 1.00 (0.87 - 1.14) | 0.9787 | 1.02 (0.82 - 1.27) | 0.8303 |
| 112 (28.8) | 13 (3.3)   | 0.98 (0.81 - 1.18) | 0.7997 | 0.94 (0.75 - 1.16) | 0.545  |
| 132 (33.9) | 20 (5.1)   | 1.08 (0.91 - 1.29) | 0.3629 | 1.07 (0.87 - 1.31) | 0.5401 |
| 143 (36.7) | 27 (6.9)   | 1.12 (0.95 - 1.31) | 0.1922 | 1.09 (0.89 - 1.33) | 0.4083 |
| 140 (35.9) | 31 (7.9)   | 0.99 (0.84 - 1.16) | 0.8887 | 0.95 (0.78 - 1.16) | 0.6315 |
| 144 (36.9) | 35 (9.0)   | 1.08 (0.93 - 1.25) | 0.3306 | 1.15 (0.94 - 1.40) | 0.1779 |
| 167 (42.8) | 55 (14.1)  | 0.99 (0.86 - 1.14) | 0.9386 | 1.03 (0.84 - 1.26) | 0.7776 |
| 31 (7.9)   | 2 (0.5)    | 1.23 (0.88 - 1.72) | 0.2227 | 1.21 (0.85 - 1.73) | 0.296  |
| 186 (47.7) | 74 (19.0)  | 0.89 (0.78 - 1.03) | 0.1144 | 0.87 (0.70 - 1.07) | 0.186  |
| 148 (37.9) | 34 (8.7)   | 0.92 (0.80 - 1.07) | 0.2957 | 0.96 (0.79 - 1.17) | 0.6926 |
| 138 (35.5) | 13 (3.3)   | 1.03 (0.87 - 1.22) | 0.7235 | 1.10 (0.89 - 1.34) | 0.3849 |
| 113 (29.0) | 13 (3.3)   | 0.95 (0.79 - 1.15) | 0.6245 | 0.92 (0.75 - 1.14) | 0.4674 |
| 146 (37.5) | 19 (4.9)   | 0.93 (0.78 - 1.11) | 0.4445 | 0.88 (0.72 - 1.08) | 0.2113 |
| 131 (33.7) | 18 (4.6)   | 0.97 (0.82 - 1.15) | 0.7369 | 0.98 (0.80 - 1.21) | 0.8598 |
| 104 (26.9) | 10 (2.6)   | 1.07 (0.88 - 1.29) | 0.5029 | 1.08 (0.87 - 1.35) | 0.4848 |
| 103 (26.5) | 15 (3.9)   | 1.02 (0.85 - 1.22) | 0.8465 | 1.00 (0.81 - 1.25) | 0.9776 |
| 32 (8.2)   | 0 (0.0)    | 1.12 (0.78 - 1.61) | 0.5333 | 1.12 (0.78 - 1.61) | 0.5333 |
| 50 (12.8)  | 3 (0.8)    | 1.03 (0.80 - 1.33) | 0.8076 | 1.12 (0.84 - 1.50) | 0.448  |

| AAO_Women Recessive<br>Model<br>HR (95%CI) | AAO_Women<br>Recessive P-value |
|--------------------------------------------|--------------------------------|
| 1.28 (0.97 - 1.69)                         | 0.0769                         |
| 1.16 (0.89 - 1.51)                         | 0.2675                         |
| 0.59 (0.15 - 2.36)                         | 0.4532                         |
| ( - )                                      | --                             |
| 1.04 (0.81 - 1.33)                         | 0.7548                         |
| 0.91 (0.69 - 1.19)                         | 0.4823                         |
| 0.84 (0.65 - 1.09)                         | 0.1871                         |
| 0.82 (0.34 - 1.99)                         | 0.6572                         |
| 1.26 (0.96 - 1.67)                         | 0.0982                         |
| 0.84 (0.65 - 1.09)                         | 0.1871                         |
| 1.66 (0.53 - 5.18)                         | 0.3821                         |
| 0.81 (0.34 - 1.96)                         | 0.6432                         |
| 1.17 (0.29 - 4.70)                         | 0.8248                         |
| 1.40 (0.90 - 2.18)                         | 0.1334                         |
| 1.50 (0.67 - 3.36)                         | 0.3275                         |
| 1.78 (0.97 - 3.24)                         | 0.0618                         |
| 0.89 (0.54 - 1.47)                         | 0.653                          |
| 1.04 (0.71 - 1.52)                         | 0.8338                         |
| 1.63 (1.03 - 2.56)                         | 0.0354                         |
| 1.15 (0.91 - 1.44)                         | 0.2418                         |
| 7.83 (1.93 - 31.85)                        | 0.004                          |
| 1.02 (0.80 - 1.30)                         | 0.8682                         |
| 1.43 (0.53 - 3.83)                         | 0.4784                         |
| 0.95 (0.73 - 1.23)                         | 0.688                          |
| 0.79 (0.51 - 1.23)                         | 0.307                          |
| 1.37 (0.79 - 2.39)                         | 0.2625                         |
| 0.92 (0.68 - 1.24)                         | 0.5837                         |
| 1.61 (0.99 - 2.62)                         | 0.0573                         |
| 0.93 (0.63 - 1.37)                         | 0.7077                         |
| 1.11 (0.87 - 1.40)                         | 0.4051                         |
| 0.93 (0.70 - 1.23)                         | 0.6008                         |
| 1.37 (0.57 - 3.31)                         | 0.4852                         |
| 1.32 (0.94 - 1.85)                         | 0.1053                         |
| 1.67 (0.94 - 2.98)                         | 0.0819                         |
| 1.02 (0.63 - 1.63)                         | 0.944                          |
| 1.68 (0.79 - 3.55)                         | 0.1774                         |
| 0.67 (0.25 - 1.81)                         | 0.4322                         |
| 4.76 (1.51 - 14.99)                        | 0.0076                         |
| 1.96 (0.73 - 5.26)                         | 0.1826                         |
| ( - )                                      | --                             |
| 1.24 (0.40 - 3.87)                         | 0.7116                         |
| 1.11 (0.78 - 1.60)                         | 0.5581                         |
| 1.49 (0.84 - 2.66)                         | 0.1724                         |
| 1.21 (0.93 - 1.57)                         | 0.1513                         |
| 1.29 (1.01 - 1.64)                         | 0.0438                         |
| 0.93 (0.63 - 1.38)                         | 0.7258                         |
| 0.86 (0.61 - 1.21)                         | 0.3872                         |
| 1.72 (0.71 - 4.17)                         | 0.2298                         |



|                     |        |
|---------------------|--------|
| 1.33 (0.78 - 2.27)  | 0.3023 |
| 1.04 (0.72 - 1.48)  | 0.8461 |
| 0.92 (0.58 - 1.46)  | 0.7257 |
| 1.64 (1.04 - 2.59)  | 0.0317 |
| 1.07 (0.76 - 1.50)  | 0.7019 |
| 0.93 (0.73 - 1.19)  | 0.5674 |
| 0.93 (0.61 - 1.40)  | 0.7202 |
| 1.99 (0.94 - 4.23)  | 0.0722 |
| 1.63 (0.84 - 3.17)  | 0.1491 |
| 0.77 (0.54 - 1.09)  | 0.1384 |
| 0.54 (0.14 - 2.19)  | 0.3907 |
| 0.85 (0.61 - 1.19)  | 0.3459 |
| 0.54 (0.14 - 2.19)  | 0.3906 |
| 1.50 (0.74 - 3.02)  | 0.2622 |
| 0.75 (0.54 - 1.05)  | 0.0912 |
| 1.59 (0.59 - 4.27)  | 0.3558 |
| 0.88 (0.49 - 1.56)  | 0.6581 |
| 3.80 (1.68 - 8.58)  | 0.0013 |
| 0.94 (0.74 - 1.18)  | 0.5717 |
| 1.22 (0.90 - 1.67)  | 0.2062 |
| 0.98 (0.76 - 1.26)  | 0.8683 |
| 1.35 (0.83 - 2.20)  | 0.2236 |
| 1.14 (0.81 - 1.62)  | 0.4538 |
| 0.78 (0.53 - 1.15)  | 0.2073 |
| 1.30 (0.85 - 1.99)  | 0.218  |
| 1.07 (0.51 - 2.26)  | 0.8608 |
| 2.37 (1.22 - 4.63)  | 0.0112 |
| 0.95 (0.13 - 6.74)  | 0.9561 |
| 0.78 (0.51 - 1.18)  | 0.234  |
| 0.94 (0.69 - 1.27)  | 0.6741 |
| 0.97 (0.63 - 1.51)  | 0.9086 |
| 1.17 (0.73 - 1.85)  | 0.5133 |
| 1.70 (0.42 - 6.85)  | 0.454  |
| 0.96 (0.70 - 1.31)  | 0.7932 |
| 1.00 (0.25 - 4.03)  | 0.9964 |
| 1.10 (0.79 - 1.54)  | 0.57   |
| 1.66 (0.23 - 11.85) | 0.6132 |
| 3.39 (0.84 - 13.71) | 0.0862 |
| 3.56 (0.88 - 14.37) | 0.075  |
| 0.97 (0.36 - 2.60)  | 0.9505 |
| ( - )               | --     |
| 0.85 (0.38 - 1.90)  | 0.6875 |
| 3.06 (1.67 - 5.61)  | 0.0003 |
| 1.27 (0.57 - 2.84)  | 0.5633 |
| 1.97 (0.88 - 4.43)  | 0.1011 |
| 1.38 (0.71 - 2.68)  | 0.3359 |
| 0.93 (0.35 - 2.50)  | 0.8866 |
| 0.97 (0.76 - 1.24)  | 0.8218 |
| 2.53 (0.80 - 7.93)  | 0.1122 |
| 1.12 (0.87 - 1.45)  | 0.3692 |
| 1.10 (0.27 - 4.42)  | 0.8947 |
| 0.91 (0.49 - 1.71)  | 0.7776 |
| 1.14 (0.88 - 1.46)  | 0.3285 |

|                     |        |
|---------------------|--------|
| 0.56 (0.27 - 1.19)  | 0.1308 |
| 1.23 (0.95 - 1.60)  | 0.1186 |
| 1.04 (0.71 - 1.53)  | 0.8432 |
| 0.92 (0.70 - 1.22)  | 0.5649 |
| 1.09 (0.87 - 1.36)  | 0.4372 |
| 1.18 (0.85 - 1.63)  | 0.3234 |
| 0.93 (0.34 - 2.48)  | 0.8778 |
| 3.03 (0.42 - 21.72) | 0.2694 |
| 3.02 (0.42 - 21.65) | 0.2708 |
| 3.03 (0.42 - 21.72) | 0.2694 |
| 1.09 (0.76 - 1.56)  | 0.6255 |
| 0.73 (0.47 - 1.11)  | 0.14   |
| 0.51 (0.07 - 3.64)  | 0.5024 |
| 0.91 (0.58 - 1.41)  | 0.6636 |
| 7.79 (1.08 - 56.30) | 0.0418 |
| 1.08 (0.82 - 1.42)  | 0.6022 |
| 1.12 (0.50 - 2.51)  | 0.7885 |
| 1.43 (0.36 - 5.74)  | 0.6139 |
| 0.97 (0.76 - 1.23)  | 0.7818 |
| 1.30 (0.75 - 2.26)  | 0.3499 |
| 1.29 (0.82 - 2.03)  | 0.2616 |
| 1.39 (0.94 - 2.06)  | 0.0989 |
| 1.12 (0.77 - 1.61)  | 0.5578 |
| 0.98 (0.69 - 1.39)  | 0.9259 |
| 0.92 (0.69 - 1.23)  | 0.5854 |
| 2.40 (0.60 - 9.66)  | 0.2187 |
| 0.85 (0.66 - 1.10)  | 0.2072 |
| 0.74 (0.52 - 1.06)  | 0.1021 |
| 0.74 (0.43 - 1.29)  | 0.2945 |
| 1.14 (0.66 - 1.98)  | 0.641  |
| 1.24 (0.78 - 1.97)  | 0.3532 |
| 0.88 (0.55 - 1.42)  | 0.607  |
| 1.06 (0.57 - 1.99)  | 0.8526 |
| 1.14 (0.68 - 1.91)  | 0.6165 |
| ( - )               | --     |
| 0.48 (0.15 - 1.52)  | 0.2129 |
